# Supplementary material for: Molecular Responses to Cadmium Exposure in Two Contrasting Durum Wheat Genotypes
Source: Int J Mol Sci. 2021 Jul 8;22(14):7343. doi: 10.3390/ijms22147343 (PMC8306872; doi:10.3390/ijms22147343)
Supplement: Supplementary file 1 [file ijms-22-07343-s001.zip]

Archive with 8 entries (8 files):
- Figure S1_Near-Isogenic Line Breeding Scheme.pdf
- Table S1_Expression data.xlsx
- Table S2_More expressed in L-Cd CTRL.xlsx
- Table S3_More expressed in H-Cd CTRL.xlsx
- Table S4_ Up-regulated only in L-Cd treated plants.xlsx
- Table S5_ Down-regulated only in L-Cd treated plants.xlsx
- Table S6_ Up-regulated only in H-Cd treated plants.xlsx
- Table S7_Down-regulated only in H-Cd treated plants.xlsx
