# Supplementary material for: Molecular Responses to Cadmium Exposure in Two Contrasting Durum Wheat Genotypes
Source: Int J Mol Sci. 2021 Jul 8;22(14):7343. doi: 10.3390/ijms22147343 (PMC8306872; doi:10.3390/ijms22147343)
Supplement: Supplementary file 1 [file ijms-22-07343-s001.zip › Table S1_Expression data.xlsx]

## Sheet: Foglio1
gene_id	L_root_CTRL	L_root_CD	H_root_CTRL	H_root_CD	CV	CRTL root L Vs H	L Root CTRL Vs CD	H Root CTRL Vs CD	GO_annotation	blastx_hit_def	Annotation
contig104901	0.553946	0.56175	0.563156	0.537208	0.0215058
contig20652	15.0128	14.0268	14.8723	12.8219	0.0709813				GO:0016740	AT4G36720.1	HVA22-like protein K
contig267	1.80654	1.58116	1.82625	1.66566	0.0679779				GO:0016020	AT4G14160.1	Sec23/Sec24 protein transport family protein
contig18345	12.074	12.9848	14.0966	12.1614	0.073215					AT4G26100.1	casein kinase 1
contig21117	50.892	51.7994	54.1819	47.6867	0.05256				GO:0005634
contig3393	8.17112	8.68677	8.76819	8.0432	0.0431791				GO:0005737	AT2G35780.1	serine carboxypeptidase-like 26
contig43232	1.28828	1.25144	1.06059	1.10858	0.093256				GO:0004872	AT3G02130.1	receptor-like protein kinase 2
contig16413	14.5911	14.1552	14.0489	12.0427	0.0828388				GO:0006464	AT3G06620.1	PAS domain-containing protein tyrosine kinase family protein
contig5492	19.2472	17.0673	16.6247	17.0752	0.0674896				GO:0006950	AT5G37370.1	PRP38 family protein
contig37744	34.0246	30.4393	32.1983	29.6413	0.0617846				GO:0016740	AT2G44050.1	6 7-dimethyl-8-ribityllumazine synthase / DMRL synthase / lumazine synthase / riboflavin synthase
contig80921	3.16514	2.72641	2.56995	2.8523	0.0892469				GO:0003723	AT2G21790.1	ribonucleotide reductase 1
contig96030	4.35998	4.59741	4.3625	4.4034	0.0254642				GO:0005886	AT1G77290.1	Glutathione S-transferase family protein
contig49556	1.18011	1.10388	1.15178	1.21348	0.0399244
contig26690	8.30491	9.43494	8.92427	8.64325	0.0541507				GO:0008150	AT5G12170.2	CRT (chloroquine-resistance transporter)-like transporter 3
contig15707	14.2503	16.1539	16.1464	15.996	0.0592896					AT1G60670.2	Protein of unknown function (DUF3755)
contig30316	4.84754	5.64564	4.98211	4.50507	0.0956816
contig41974	22.1207	18.1269	22.8457	21.554	0.0988198				GO:0005622	AT3G12300.1	unknown protein; FUNCTIONS IN: molecular_function unknown; INVOLVED IN: biological_process unknown; LOCATED IN: endomembrane system; EXPRESSED IN: 23 plant structures; EXPRESSED DURING: 15 growth stages; CONTAINS InterPro DOMAIN/s: Protein of unknown function DUF667 (InterPro:IPR007714); Has 373 Blast hits to 371 proteins in 116 species: Archae - 0; Bacteria - 0; Metazoa - 213; Fungi - 4; Plants …
contig24616	28.1053	23.6231	28.4385	28.4501	0.0868933				GO:0005515	AT3G23490.1	cyanase
contig29551	6.01019	5.15828	5.8931	5.55303	0.0677366				GO:0019538	AT1G24120.1	ARG1-like 1
contig51455	17.4854	13.6174	14.38	14.9503	0.110945
contig24595	13.838	12.5349	11.244	11.5192	0.0956817				GO:0006810	AT1G29690.1	MAC/Perforin domain-containing protein
contig152457	0.159113	0.146537	0.172279	0.154325	0.0683366
contig142720	0.389326	0.429436	0.377595	0.376269	0.0633028
contig42667	5.59703	5.06917	5.05311	4.67842	0.0740623				GO:0005829	AT4G40050.1	Protein of unknown function (DUF3550/UPF0682)
contig32382	7.18436	6.30159	7.05597	6.71905	0.0579097				GO:0016740	AT3G20650.1	mRNA capping enzyme family protein
contig20181	14.5312	15.8409	15.3776	13.4541	0.0708694				GO:0016020	AT1G15080.1	lipid phosphate phosphatase 2
contig85901	1.4298	1.25384	1.53514	1.6049	0.10491
contig46572	6.35489	6.75762	6.16091	5.43493	0.0896348
contig25693	362.696	302.495	306.219	298.494	0.0954757
contig23173	21.9356	20.1375	20.3111	18.172	0.0765311				GO:0000166	AT1G12680.1	phosphoenolpyruvate carboxylase-related kinase 2
contig29652	10.246	8.96314	8.53932	9.04074	0.0797019
contig10290	15.1143	14.2135	14.8384	14.9414	0.0265598				GO:0016787	AT1G22620.1	Phosphoinositide phosphatase family protein
contig10994	29.3376	23.5787	25.76	25.2779	0.0931486
contig30117	6.79844	5.784	6.74774	5.64916	0.0981299				GO:0016301	AT3G03900.1	adenosine-5'-phosphosulfate (APS) kinase 3
contig23024	11.7481	10.4112	12.8376	11.439	0.0860315				GO:0000166	AT3G16170.1	AMP-dependent synthetase and ligase family protein
contig86651	0.551239	0.460618	0.459593	0.476297	0.0894251
contig1126	6.80534	5.84179	6.53492	5.92795	0.0745427				GO:0005737	AT5G42370.2	Calcineurin-like metallo-phosphoesterase superfamily protein
contig12743	7.00424	5.18679	5.9046	5.82392	0.126191				GO:0009856	AT4G21090.2	MITOCHONDRIAL FERREDOXIN 2
contig23398	28.887	22.7875	26.5182	23.4248	0.111651				GO:0005488	AT1G08110.4	lactoylglutathione lyase family protein / glyoxalase I family protein
contig26458	9.1776	10.7847	9.32192	8.27087	0.110815				GO:0005634	AT3G29575.1	ABI five binding protein 3
contig16528	0.821601	0.686191	0.826668	0.704996	0.0982253				GO:0005739	AT3G18180.1	Glycosyltransferase family 61 protein
contig75288	6.8711	6.08313	7.022	6.95396	0.0649561				GO:0016740	AT5G49680.2	Golgi-body localisation protein domain ;RNA pol II promoter Fmp27 protein domain
contig7726	6.17201	4.63985	6.17872	5.77193	0.127557				GO:0008152	AT2G22480.1	phosphofructokinase 5
contig89000	1.21487	1.08179	1.14982	1.14723	0.047317
contig55381	3.53018	4.47616	3.5886	3.58423	0.119907				GO:0016787	AT1G65810.1	P-loop containing nucleoside triphosphate hydrolases superfamily protein
contig22411	4.73209	4.2406	4.93229	4.13866	0.0847172				GO:0016787
contig19367	18.0143	14.9068	18.2492	15.6941	0.0998265				GO:0006950	AT2G26890.1	DNAJ heat shock N-terminal domain-containing protein
contig24115	32.0674	34.7629	36.5416	27.7562	0.116595				GO:0000166	AT3G18820.1	RAB GTPase homolog G3F
contig36221	10.4144	10.5413	11.7071	9.1553	0.099804				GO:0008152	AT1G18640.2	3-phosphoserine phosphatase
contig19428	4.82284	3.53931	4.41735	3.89852	0.135591					AT1G21610.3	wound-responsive family protein
contig48600	2.74655	2.46086	3.05519	2.37681	0.115577
contig52141	1.3328	1.13613	1.20614	1.06786	0.0954149				GO:0005623	AT3G13160.1	Tetratricopeptide repeat (TPR)-like superfamily protein
contig51076	0.715349	0.590661	0.731092	0.684762	0.0924132
contig1177	9.5358	8.18979	8.28406	7.4954	0.101389				GO:0016787	AT1G04290.1	Thioesterase superfamily protein
contig23174	21.5088	20.2723	22.2211	20.7975	0.0400309				GO:0000166	AT1G12680.1	phosphoenolpyruvate carboxylase-related kinase 2
contig15883	27.3516	25.3185	26.6775	21.4858	0.104005				GO:0016740	AT3G52090.2	DNA-directed RNA polymerase RBP11-like
contig11680	23.3408	18.5636	24.9652	20.3387	0.132413				GO:0009056	AT4G13360.1	ATP-dependent caseinolytic (Clp) protease/crotonase family protein
contig1516	3.83504	3.4853	3.67547	3.80262	0.04287
contig47627	8.95363	8.74336	9.62602	8.25847	0.0637914				GO:0016020	AT5G14040.1	phosphate transporter 3;1
contig101603	1.39063	1.09262	1.32602	1.4713	0.123403
contig22007	26.36	26.9329	27.509	21.237	0.113167				GO:0005488	AT1G74410.1	RING/U-box superfamily protein
contig44377	24.5224	18.3781	23.3901	24.4324	0.128483				GO:0005739	AT4G33380.1	unknown protein; Has 194 Blast hits to 189 proteins in 23 species: Archae - 0; Bacteria - 0; Metazoa - 0; Fungi - 0; Plants - 184; Viruses - 0; Other Eukaryotes - 10 (source: NCBI BLink).
contig28495	14.7451	13.7255	15.4551	12.7597	0.0831822				GO:0005886	AT3G17440.1	novel plant snare 13
contig54140	2.70009	2.25262	2.74196	2.63925	0.0869246				GO:0005886	AT3G54460.1	SNF2 domain-containing protein / helicase domain-containing protein / F-box family protein
contig1297	54.7939	58.2227	68.5915	60.1291	0.0971151				GO:0006464	AT1G70660.1	MMS ZWEI homologue 2
contig31471	11.7643	12.5896	12.1656	13.09	0.0458736				GO:0005622	AT3G18140.1	Transducin/WD40 repeat-like superfamily protein
contig22669	16.7679	14.61	13.6219	14.8658	0.0878851				GO:0005737	AT4G02120.1	CTP synthase family protein
contig18181	25.6959	28.8995	29.7413	23.9017	0.101001				GO:0005488	AT1G74410.1	RING/U-box superfamily protein
contig15110	19.3872	17.9226	18.6375	14.3166	0.127933				GO:0030234	AT4G15415.2	Protein phosphatase 2A regulatory B subunit family protein
contig51186	5.66946	6.27764	6.86619	5.04593	0.131365				GO:0016787	AT1G18440.1	Peptidyl-tRNA hydrolase family protein
contig79910	1.27125	1.5692	1.55656	1.26728	0.119771
contig29866	3.99363	2.99902	3.49986	2.99604	0.14152				GO:0005634	AT5G62610.1	basic helix-loop-helix (bHLH) DNA-binding superfamily protein
contig41024	4.59497	4.51984	4.9459	4.83512	0.0423228					AT3G14910.1	unknown protein; Has 158 Blast hits to 158 proteins in 77 species: Archae - 0; Bacteria - 0; Metazoa - 104; Fungi - 0; Plants - 33; Viruses - 0; Other Eukaryotes - 21 (source: NCBI BLink).
contig145813	0.417065	0.376032	0.354585	0.347875	0.0834159
contig62973	4.6352	4.49025	5.33143	4.26952	0.0979514				GO:0008152	AT3G13800.1	Metallo-hydrolase/oxidoreductase superfamily protein
contig60993	4.26377	3.82762	4.2998	4.6125	0.0759216
contig57657	1.67549	2.1422	1.91874	1.67336	0.121406				GO:0005488	AT5G20510.1	alfin-like 5
contig7158	29.4566	24.4095	28.5738	30.8761	0.0981251				GO:0000003	AT3G08850.1	HEAT repeat ;WD domain G-beta repeat protein protein
contig38170	11.999	11.0824	10.4927	9.01185	0.117754				GO:0019725	AT1G77370.1	Glutaredoxin family protein
contig41666	4.46317	3.69278	3.4996	3.49658	0.121265				GO:0003824	AT4G16700.1	phosphatidylserine decarboxylase 1
contig48482	3.06213	2.29253	2.86857	2.4944	0.130388				GO:0005737	AT2G38680.1	5'-nucleotidases;magnesium ion binding
contig59927	20.6333	15.4399	15.3647	16.6354	0.145683
contig78724	2.39283	2.13228	2.67577	2.58864	0.0985114
contig25558	6.34011	5.21097	5.0509	5.15873	0.110961
contig75208	1.1036	0.974207	0.961889	1.0216	0.0632643
contig20368	1.83999	1.7326	1.77894	1.53992	0.0752519
contig14632	54.8837	52.5716	53.0502	49.2661	0.044631				GO:0016020	AT3G57330.1	autoinhibited Ca2+-ATPase 11
contig97882	0.458515	0.42989	0.47449	0.427515	0.0509338
contig11741	5.72289	5.66823	5.94983	6.34138	0.0516641
contig139469	0.32727	0.273108	0.264387	0.338828	0.124933
contig5787	27.9132	22.0598	25.4918	28.1792	0.109525				GO:0005623	AT3G50050.1	Eukaryotic aspartyl protease family protein
contig28740	19.4804	16.195	17.262	16.3531	0.0873658					AT3G24315.1	Sec20 family protein
contig113261	3.63607	3.93475	4.24593	3.6003	0.0781217
contig8063	5.52822	4.54152	4.78511	4.47789	0.0997069
contig23416	10.1504	10.352	10.3912	8.79122	0.0766716				GO:0016020	AT5G14040.1	phosphate transporter 3;1
contig15760	5.91925	5.94627	7.15141	5.2002	0.133611				GO:0007275	AT3G61790.1	Protein with RING/U-box and TRAF-like domains
contig16569	45.092	40.0517	48.5472	34.2641	0.148135				GO:0003676	AT2G40960.1	Single-stranded nucleic acid binding R3H protein
contig52016	4.2653	3.51906	3.86285	3.57353	0.0898352					AT4G24740.1	FUS3-complementing gene 2
contig17388	10.0486	8.19054	10.3225	7.91309	0.136221				GO:0005488	AT3G08505.2	zinc finger (CCCH-type/C3HC4-type RING finger) family protein
contig5053	30.0907	32.1952	37.1541	36.3963	0.0994599				GO:0016020	AT4G19645.1	TRAM LAG1 and CLN8 (TLC) lipid-sensing domain containing protein
contig98722	1.02063	0.840902	0.787899	0.901714	0.112672
contig60193	3.02784	2.40427	3.14612	2.88819	0.113637				GO:0005737	AT3G23750.1	Leucine-rich repeat protein kinase family protein
contig2335	39.275	30.8937	37.8962	37.5635	0.102989				GO:0006464	AT1G70320.1	ubiquitin-protein ligase 2
contig14614	3.50003	2.66754	2.58638	3.29579	0.150729					AT3G55140.1	Pectin lyase-like superfamily protein
contig34521	13.2633	11.007	10.3328	12.677	0.116517				GO:0005515	AT2G06005.1	FRIGIDA interacting protein 1
contig47199	6.63537	5.64919	5.83088	5.90662	0.0721962					AT2G37160.2	Transducin/WD40 repeat-like superfamily protein
contig64129	0.9554	0.81278	0.780078	0.929727	0.0989781
contig35450	8.90995	6.937	8.63517	8.99508	0.115558				GO:0005737	AT4G10730.1	Protein kinase superfamily protein
contig28424	6.82641	6.84407	6.1211	6.22091	0.0593134				GO:0005488	AT4G26180.1	Mitochondrial substrate carrier family protein
contig15236	10.534	9.54242	11.1065	8.60981	0.110737
contig41055	1.10449	0.927342	0.903511	0.826309	0.125028
contig64155	6.14428	7.31306	6.93514	7.99337	0.108667				GO:0000166
contig48017	13.4098	9.80533	12.6896	13.1823	0.13621				GO:0016043	AT3G58390.1	Eukaryotic release factor 1 (eRF1) family protein
contig101629	1.58408	1.36856	1.36124	1.24955	0.100552
contig36019	35.8268	38.0981	40.1957	29.5614	0.128047				GO:0008152	AT3G02870.1	Inositol monophosphatase family protein
contig50705	2.4253	2.09035	2.11604	2.37576	0.0769015				GO:0005829	AT3G12070.1	RAB geranylgeranyl transferase beta subunit 2
contig77840	13.0627	13.3964	15.1309	13.0911	0.0720832				GO:0006950	AT4G23400.1	plasma membrane intrinsic protein 1;5
contig40952	110.275	107.796	101.415	87.2153	0.101669
contig2472	129.096	128.271	167.092	141.941	0.127899					AT2G39050.1	hydroxyproline-rich glycoprotein family protein
contig134912	4.33171	4.37936	4.29336	3.19135	0.141472
contig5990	7.7534	8.44727	9.38034	7.39127	0.106232
contig140667	0.328937	0.35532	0.300156	0.309473	0.0753829
contig41543	7.92777	5.47847	6.22544	6.59517	0.156372				GO:0006464	AT2G43080.1	P4H isoform 1
contig97403	5.15145	3.95217	3.9363	4.12137	0.135226				GO:0000166	AT5G50000.1	Protein kinase superfamily protein
contig8695	5.54947	4.79232	4.58249	4.55108	0.0957556				GO:0005215	AT5G09400.1	K+ uptake permease 7
contig105515	0.438296	0.443729	0.451408	0.586271	0.148149				GO:0005488	AT4G19190.1	zinc knuckle (CCHC-type) family protein
contig38067	1.46662	1.2695	1.22642	1.08502	0.124892
contig7727	4.60908	3.45822	4.27083	3.78249	0.126645				GO:0008152	AT2G22480.1	phosphofructokinase 5
contig37565	11.0503	8.68043	10.2525	10.9046	0.10611				GO:0005515	AT2G06005.1	FRIGIDA interacting protein 1
contig95851	1.19158	0.940384	1.27748	1.23992	0.130849
contig76282	10.5382	9.59065	8.90115	7.76181	0.127115
contig32206	1.98977	1.74203	2.01298	1.90437	0.0641831
contig29507	2.91144	2.55333	2.20926	2.233	0.133052
contig10236	9.39042	10.5441	9.51179	7.76982	0.123208				GO:0000166	AT4G30360.1	cyclic nucleotide-gated channel 17
contig6541	61.9329	47.6717	59.6581	51.8288	0.120565
contig7123	14.3675	15.1795	13.7668	12.6307	0.0767287				GO:0005768	AT1G63690.2	SIGNAL PEPTIDE PEPTIDASE-LIKE 2
contig14406	17.9726	15.1489	15.7995	13.9267	0.1079					AT1G25682.1	Family of unknown function (DUF572)
contig36044	14.7924	10.4366	12.8181	13.0936	0.140215				GO:0016020
contig36633	38.6248	37.1776	46.5194	36.7557	0.114929				GO:0005737	AT4G30600.1	signal recognition particle receptor alpha subunit family protein
contig4437	25.6755	27.0142	28.6967	21.461	0.120246				GO:0005829	AT1G17370.1	oligouridylate binding protein 1B
contig38709	6.80552	5.924	7.16443	5.44064	0.124925					AT5G20580.1	BEST Arabidopsis thaliana protein match is: FRIGIDA interacting protein 1 (TAIR:AT2G06005.1); Has 167 Blast hits to 167 proteins in 73 species: Archae - 0; Bacteria - 25; Metazoa - 58; Fungi - 25; Plants - 43; Viruses - 0; Other Eukaryotes - 16 (source: NCBI BLink).
contig32310	5.36709	3.76226	4.7002	5.10554	0.148589
contig59841	0.84334	0.628861	0.871566	0.786965	0.138512
contig30608	4.30642	4.05585	3.84221	3.19359	0.123824
contig21323	22.1825	21.0732	20.3311	22.6554	0.048899				GO:0005886	AT2G26510.1	Xanthine/uracil permease family protein
contig2095	5.20119	3.91863	5.50724	4.60144	0.145972				GO:0005739	AT3G58830.1	haloacid dehalogenase (HAD) superfamily protein
contig1959	12.6944	9.79474	12.5445	10.2522	0.133518				GO:0006810	AT2G39480.1	P-glycoprotein 6
contig38103	12.8313	14.932	13.6391	11.9138	0.0960413
contig34982	10.8235	8.49116	8.43201	10.1887	0.127454
contig56862	2.08731	2.15127	2.27822	1.87166	0.0810441				GO:0005737	AT5G50380.1	exocyst subunit exo70 family protein F1
contig57388	4.14186	4.21511	4.12417	3.81798	0.0431111				GO:0005737	AT1G57680.1	FUNCTIONS IN: molecular_function unknown; INVOLVED IN: biological_process unknown; LOCATED IN: endomembrane system; EXPRESSED IN: 24 plant structures; EXPRESSED DURING: 15 growth stages; CONTAINS InterPro DOMAIN/s: Uncharacterised conserved protein UCP031277 (InterPro:IPR016971); Has 70 Blast hits to 70 proteins in 19 species: Archae - 0; Bacteria - 0; Metazoa - 1; Fungi - 0; Plants - 66; Viruses…
contig25031	18.9945	13.4645	14.662	16.1072	0.150811				GO:0006464	AT1G60220.1	UB-like protease 1D
contig56683	8.87666	8.61459	7.45808	7.76737	0.0824892
contig40503	1.12825	0.957721	1.06413	1.21907	0.100661				GO:0016301	AT4G32250.1	Protein kinase superfamily protein
contig131451	0.981868	0.757071	0.752365	1.01026	0.159741
contig2692	29.8097	25.5771	32.3082	29.4316	0.0949396				GO:0003677	AT1G27000.1	Protein of unknown function (DUF1664)
contig33388	5.82377	4.38722	5.38793	4.59266	0.133448				GO:0000166	AT5G14640.1	shaggy-like kinase 13
contig24153	13.6131	12.2973	12.639	9.75764	0.136089				GO:0005737	AT1G77370.1	Glutaredoxin family protein
contig57468	1.0691	0.856054	0.845717	0.85868	0.118971				GO:0005488	AT3G19210.1	homolog of RAD54
contig12843	31.676	24.4376	23.2802	31.1427	0.158868
contig15416	44.0421	31.4776	34.8246	40.8814	0.150624				GO:0003723	AT5G64220.1	Calmodulin-binding transcription activator protein with CG-1 and Ankyrin domains
contig96746	0.544314	0.475544	0.462186	0.582879	0.110755
contig41017	1.38583	1.23315	1.03107	1.0311	0.147314
contig4462	44.3329	39.5104	47.417	35.0774	0.130401					AT1G66240.1	homolog of anti-oxidant 1
contig38659	6.04668	4.63417	5.691	4.42215	0.152407				GO:0016020	AT2G47830.1	Cation efflux family protein
contig29183	21.6135	18.9484	26.6848	22.3062	0.14335				GO:0006950	AT2G47590.1	photolyase/blue-light receptor 2
contig112703	7.32524	8.30935	7.38297	6.14872	0.121419
contig40617	10.6045	7.76203	9.29127	8.57841	0.133009				GO:0008152	AT4G02405.1	S-adenosyl-L-methionine-dependent methyltransferases superfamily protein
contig16305	0.880427	0.744923	0.716919	0.836581	0.0964639					AT3G14205.1	Phosphoinositide phosphatase family protein
contig44720	2.20676	2.10205	2.19607	1.67797	0.122028				GO:0016787	AT5G28950.1	unknown protein; BEST Arabidopsis thaliana protein match is: unknown protein (TAIR:AT5G41980.1); Has 448 Blast hits to 446 proteins in 74 species: Archae - 0; Bacteria - 0; Metazoa - 31; Fungi - 21; Plants - 396; Viruses - 0; Other Eukaryotes - 0 (source: NCBI BLink).
contig75982	1.9227	1.4966	1.58175	1.60391	0.113122				GO:0019538	AT5G62390.1	BCL-2-associated athanogene 7
contig5815	35.5229	30.4077	28.3881	34.2681	0.10325					AT5G46410.2	SCP1-like small phosphatase 4
contig96435	0.401785	0.346132	0.419216	0.389372	0.0800956
contig29277	6.63903	6.14267	6.69786	6.31193	0.0410977					AT1G16170.1	unknown protein; FUNCTIONS IN: molecular_function unknown; INVOLVED IN: biological_process unknown; LOCATED IN: cellular_component unknown; EXPRESSED IN: 24 plant structures; EXPRESSED DURING: 15 growth stages; BEST Arabidopsis thaliana protein match is: unknown protein (TAIR:AT1G79660.1); Has 55 Blast hits to 55 proteins in 13 species: Archae - 0; Bacteria - 0; Metazoa - 0; Fungi - 0; Plants - 5…
contig100680	2.94294	2.72811	2.95714	2.88024	0.0364255				GO:0005215	AT1G19800.2	trigalactosyldiacylglycerol 1
contig59663	4.79557	5.63336	5.82239	3.99509	0.165843				GO:0007275	AT3G61790.1	Protein with RING/U-box and TRAF-like domains
contig14218	13.3219	10.5959	13.0879	10.8198	0.121084				GO:0008152	AT4G16566.1	histidine triad nucleotide-binding 4
contig21405	37.4335	30.3541	28.3236	34.2531	0.124544				GO:0016787	AT3G02870.1	Inositol monophosphatase family protein
contig60727	1.43895	1.24054	1.3917	1.49502	0.0784548
contig58874	9.67774	9.15374	7.88181	9.09559	0.0849079				GO:0016787	AT3G05640.1	Protein phosphatase 2C family protein
contig81195	1.2106	1.16415	1.04044	1.12692	0.0634451
contig32700	18.8283	21.004	17.8987	18.441	0.0715115
contig51664	4.06836	3.94683	2.97832	3.15239	0.155766
contig32377	0.804277	0.679443	0.747479	0.622997	0.110781
contig52144	11.9787	9.05077	8.3267	9.26244	0.165757
contig45971	3.50479	3.2466	3.08539	3.08867	0.061027				GO:0030246	AT3G61610.1	Galactose mutarotase-like superfamily protein
contig1875	6.37833	7.39265	7.42368	6.46128	0.0826982				GO:0016020	AT5G20350.1	Ankyrin repeat family protein with DHHC zinc finger domain
contig63144	8.19121	7.87617	7.0518	7.87308	0.0629292
contig59872	19.8044	16.0719	18.4758	17.8466	0.0859097				GO:0005829	AT5G05980.1	DHFS-FPGS homolog B
contig20393	17.467	15.1771	18.1914	12.5629	0.160256				GO:0016787	AT5G61060.2	histone deacetylase 5
contig71001	10.3913	10.3893	11.8652	10.3215	0.0697851				GO:0016043	AT3G58390.1	Eukaryotic release factor 1 (eRF1) family protein
contig33291	10.8621	7.69448	9.54753	9.71018	0.138636
contig59212	5.36999	6.29028	6.222	4.37625	0.16103				GO:0005488	AT3G50700.1	indeterminate(ID)-domain 2
contig43889	1.9756	2.10538	2.09025	1.97435	0.0349598				GO:0003824	AT1G11780.1	oxidoreductase 2OG-Fe(II) oxygenase family protein
contig25159	8.04048	6.29533	7.3391	6.52411	0.113204				GO:0003700	AT2G35530.1	basic region/leucine zipper transcription factor 16
contig20279	19.0893	16.0651	19.2668	15.3741	0.115645				GO:0003723	AT3G52120.1	SWAP (Suppressor-of-White-APricot)/surp domain-containing protein / D111/G-patch domain-containing protein
contig133516	1.18724	1.20223	1.232	1.08055	0.0561291
contig1094	21.1369	15.744	20.8599	18.4424	0.13189				GO:0005737	AT4G36940.1	nicotinate phosphoribosyltransferase 1
contig66340	5.60957	4.27528	5.31411	4.81383	0.117119					AT1G25580.1	NAC (No Apical Meristem) domain transcriptional regulator superfamily protein
contig68142	6.53614	5.1789	5.54519	5.00249	0.123133
contig113235	0.329874	0.390281	0.342843	0.309116	0.100366
contig121428	0.893201	0.921888	0.812027	0.999924	0.0855825
contig49232	30.5272	31.7426	29.7792	22.3462	0.148475				GO:0006464	AT4G31170.1	Protein kinase superfamily protein
contig70630	0.570121	0.524835	0.605902	0.488332	0.0939812
contig58223	7.14657	6.95259	6.74493	5.33154	0.126028				GO:0005215	AT3G20320.1	trigalactosyldiacylglycerol2
contig10993	2.54986	1.94428	1.92375	2.34131	0.140422
contig134747	1.00519	0.773047	0.88332	0.912209	0.107039
contig84550	0.667018	0.672748	0.624578	0.543637	0.0950257
contig129922	0.701646	0.633676	0.606775	0.520577	0.121685
contig33543	5.03002	4.57093	5.62305	5.54869	0.0946615				GO:0003723	AT2G38610.1	RNA-binding KH domain-containing protein
contig19964	10.308	8.59942	9.98669	9.02803	0.0844277				GO:0005886	AT5G66850.1	mitogen-activated protein kinase kinase kinase 5
contig41777	1.38142	1.12906	1.17408	1.3556	0.100814				GO:0006950	AT1G19340.1	Methyltransferase MT-A70 family protein
contig42856	11.7937	8.95202	10.4422	10.5492	0.111469				GO:0006139	AT3G01150.1	polypyrimidine tract-binding protein 1
contig45726	4.45501	3.47074	3.89242	3.06894	0.159409				GO:0005737	AT5G27710.1	unknown protein; Has 49 Blast hits to 49 proteins in 17 species: Archae - 0; Bacteria - 0; Metazoa - 0; Fungi - 0; Plants - 48; Viruses - 0; Other Eukaryotes - 1 (source: NCBI BLink).
contig33622	3.37899	2.57271	2.73326	2.71215	0.126437				GO:0005515	AT3G15354.1	SPA1-related 3
contig26346	22.2555	15.244	21.4014	17.7508	0.170238				GO:0016740	AT1G10310.1	NAD(P)-binding Rossmann-fold superfamily protein
contig69461	2.67318	2.04447	2.68155	1.96102	0.167088					AT4G15230.1	pleiotropic drug resistance 2
contig157674	2.13424	2.03455	2.68472	2.19664	0.127849				GO:0003824
contig12925	15.6391	14.4828	17.3073	12.9607	0.121656				GO:0000166	AT1G06290.1	acyl-CoA oxidase 3
contig42528	14.6252	10.174	13.0257	14.0904	0.152907
contig35714	4.74211	5.13799	4.38271	4.9034	0.0662303
contig14002	19.7469	15.5794	20.8113	21.0889	0.132144				GO:0016301	AT3G24715.1	Protein kinase superfamily protein with octicosapeptide/Phox/Bem1p domain
contig87435	0.345164	0.34544	0.313935	0.259921	0.127407
contig39733	2.7214	3.23805	2.66268	3.10109	0.0963334					AT2G02970.1	GDA1/CD39 nucleoside phosphatase family protein
contig24722	2.38614	1.78478	1.66496	1.91384	0.163068
contig40395	1.73034	1.55431	1.63073	1.92434	0.0936189
contig37029	2.4568	1.64771	2.17025	2.20583	0.16027				GO:0005634	AT5G07890.1	myosin heavy chain-related
contig10090	12.1336	10.1051	10.6079	8.57838	0.141543				GO:0008219	AT4G29130.1	hexokinase 1
contig33346	40.7422	29.2156	37.3099	33.2225	0.142233				GO:0040029	AT5G01400.1	HEAT repeat-containing protein
contig34529	4.05734	3.11609	3.62503	3.70502	0.107089				GO:0003824	AT2G03667.1	Asparagine synthase family protein
contig16697	0.33837	0.361981	0.38067	0.30262	0.0972859
contig9305	15.2971	13.782	15.2785	14.3655	0.0504295				GO:0005515	AT5G06580.1	FAD-linked oxidases family protein
contig52808	16.1741	18.6979	20.354	17.1124	0.101567
contig69968	0.85993	0.712313	0.696268	0.783865	0.0982202					AT3G24255.1	RNA-directed DNA polymerase (reverse transcriptase)-related family protein
contig12772	10.2476	7.6949	7.84495	8.13419	0.140577					AT3G19190.1	autophagy 2
contig65481	1.48968	1.71532	1.61794	1.58191	0.0582658					AT5G54900.1	RNA-binding protein 45A
contig38254	2.04187	1.97878	2.55048	2.76028	0.164182					AT2G35680.1	Phosphotyrosine protein phosphatases superfamily protein
contig28236	9.96239	8.13758	11.8063	11.2505	0.158332				GO:0005737	AT4G10730.1	Protein kinase superfamily protein
contig2143	26.0694	22.95	23.5439	20.1436	0.104962				GO:0008152	AT4G24160.1	alpha/beta-Hydrolases superfamily protein
contig1649	4.2932	3.4105	4.79137	3.60435	0.158039					AT1G57540.1	unknown protein; Has 29 Blast hits to 29 proteins in 11 species: Archae - 0; Bacteria - 0; Metazoa - 0; Fungi - 0; Plants - 29; Viruses - 0; Other Eukaryotes - 0 (source: NCBI BLink).
contig10480	3.02409	3.17468	3.71409	3.17985	0.0924753
contig40492	5.0263	4.34242	5.93346	4.37669	0.151527				GO:0008152	AT2G43180.1	Phosphoenolpyruvate carboxylase family protein
contig23830	13.4807	15.1474	15.5048	11.7872	0.12213				GO:0005488	AT3G43240.1	ARID/BRIGHT DNA-binding domain-containing protein
contig9536	12.6421	13.5416	15.6471	12.806	0.101162					AT3G26890.1	unknown protein; BEST Arabidopsis thaliana protein match is: unknown protein (TAIR:AT5G41110.1); Has 393 Blast hits to 383 proteins in 134 species: Archae - 0; Bacteria - 61; Metazoa - 171; Fungi - 74; Plants - 80; Viruses - 0; Other Eukaryotes - 7 (source: NCBI BLink).
contig55877	2.35271	1.95798	2.3875	2.434	0.0960363
contig103913	4.93033	5.60147	5.18722	4.99114	0.0585476
contig14114	25.0672	24.6308	22.6776	16.9748	0.166675				GO:0016787	AT1G30540.1	Actin-like ATPase superfamily protein
contig46763	37.0386	29.8208	32.4172	27.233	0.132242
contig758	3.41806	3.15024	2.9378	2.79693	0.0879428
contig23872	41.7136	42.3885	41.8147	34.1882	0.0975201				GO:0009628	AT5G63890.2	histidinol dehydrogenase
contig26270	10.3823	7.77151	9.79847	10.6233	0.134323				GO:0019538	AT5G17840.1	DnaJ/Hsp40 cysteine-rich domain superfamily protein
contig26808	4.72247	4.23948	4.10676	5.78791	0.161888
contig8549	1.41534	1.21015	1.01894	1.15371	0.137321				GO:0005634	AT5G35910.1	Polynucleotidyl transferase ribonuclease H fold protein with HRDC domain
contig67910	13.4887	10.311	10.069	10.6063	0.143467				GO:0016301	AT1G09840.1	shaggy-like protein kinase 41
contig2673	22.268	19.883	26.6376	20.6257	0.135319				GO:0005777	AT4G02610.1	Aldolase-type TIM barrel family protein
contig42909	1.69799	1.43751	1.42277	1.92751	0.148033				GO:0030246	AT1G34300.1	lectin protein kinase family protein
contig38588	2.60783	2.21307	2.27201	2.93996	0.134067					AT3G24820.1	BSD domain-containing protein
contig18051	11.904	11.8102	15.1975	13.8461	0.123951				GO:0016740	AT1G13560.1	aminoalcoholphosphotransferase 1
contig488	1.77424	1.48361	1.64845	1.65485	0.0727927				GO:0000003	AT1G60170.1	pre-mRNA processing ribonucleoprotein binding region-containing protein
contig23314	12.2717	11.4173	13.5034	10.8742	0.095367				GO:0005488	AT3G43240.1	ARID/BRIGHT DNA-binding domain-containing protein
contig24799	18.0798	13.3629	15.0458	13.2059	0.151636
contig22326	8.27412	6.9778	7.75915	6.69862	0.0970954				GO:0009991	AT1G09020.1	homolog of yeast sucrose nonfermenting 4
contig56331	4.73164	5.10511	5.9544	4.08856	0.156765					AT1G58210.1	kinase interacting family protein
contig48985	9.69594	7.04274	10.4244	7.79172	0.181308				GO:0016787	AT1G48420.1	D-cysteine desulfhydrase
contig8944	17.6858	15.8557	17.4428	15.6063	0.0641508				GO:0016020	AT1G71900.1	Protein of unknown function (DUF803)
contig18729	7.5948	5.57513	5.47937	6.1423	0.157495				GO:0005488	AT2G36810.1	ARM repeat superfamily protein
contig4082	12.561	12.4284	11.4818	9.19881	0.136215					AT4G31430.2	unknown protein; LOCATED IN: plasma membrane; EXPRESSED IN: 25 plant structures; EXPRESSED DURING: 15 growth stages; Has 35333 Blast hits to 34131 proteins in 2444 species: Archae - 798; Bacteria - 22429; Metazoa - 974; Fungi - 991; Plants - 531; Viruses - 0; Other Eukaryotes - 9610 (source: NCBI BLink).
contig47580	2.49724	2.0577	2.13881	1.82849	0.130264				GO:0006350	AT4G19600.1	Cyclin family protein
contig18164	16.8252	15.1933	16.0552	14.7503	0.0587097				GO:0016787	AT3G13960.1	growth-regulating factor 5
contig664	12.0661	10.7491	11.824	9.81756	0.0932809
contig36434	2.25945	2.34181	1.93875	2.42144	0.0944811
contig11592	11.5783	9.15519	12.0547	12.1151	0.124814				GO:0005622	AT4G38600.1	HEAT repeat ;HECT-domain (ubiquitin-transferase)
contig14231	10.6517	8.84925	7.2182	8.11504	0.167313
contig109386	2.13583	2.44578	2.13764	1.55354	0.180231
contig16184	55.8265	59.6586	68.0313	68.2587	0.0986113				GO:0005829	AT5G50850.1	Transketolase family protein
contig9573	9.86573	7.2128	9.17394	8.6997	0.128623					AT5G66810.1	CONTAINS InterPro DOMAIN/s: CTLH C-terminal LisH motif (InterPro:IPR006595); BEST Arabidopsis thaliana protein match is: LisH and RanBPM domains containing protein (TAIR:AT1G61150.1); Has 333 Blast hits to 242 proteins in 88 species: Archae - 0; Bacteria - 0; Metazoa - 104; Fungi - 47; Plants - 152; Viruses - 0; Other Eukaryotes - 30 (source: NCBI BLink).
contig32028	10.5078	7.27289	10.3041	10.383	0.162729					AT5G18830.3	squamosa promoter binding protein-like 7
contig11854	5.79999	6.27908	7.18143	6.21403	0.0913739				GO:0003700	AT2G47900.3	tubby like protein 3
contig7035	12.9535	10.5087	13.8475	13.3978	0.117601				GO:0005737	AT1G47550.2	exocyst complex component sec3A
contig11769	15.9239	13.6513	14.1196	12.2609	0.108108				GO:0009058	AT5G03905.1	Iron-sulphur cluster biosynthesis family protein
contig38450	3.2862	2.87267	3.30579	3.37722	0.0711958
contig30024	14.6564	13.8843	12.6013	10.4184	0.143755				GO:0016740	AT3G27190.1	uridine kinase-like 2
contig19473	4.91421	4.94882	4.47559	3.75028	0.123365				GO:0016787	AT5G12010.1	unknown protein; INVOLVED IN: response to salt stress; LOCATED IN: chloroplast plasma membrane membrane; EXPRESSED IN: 23 plant structures; EXPRESSED DURING: 13 growth stages; BEST Arabidopsis thaliana protein match is: unknown protein (TAIR:AT4G29780.1); Has 1807 Blast hits to 1807 proteins in 277 species: Archae - 0; Bacteria - 0; Metazoa - 736; Fungi - 347; Plants - 385; Viruses - 0; Other Euk…
contig73283	27.2502	25.6444	24.7058	24.7123	0.0468652
contig29160	1.78067	1.43567	1.40121	1.70051	0.119894				GO:0005737	AT1G63430.2	Leucine-rich repeat protein kinase family protein
contig1342	27.1581	26.5105	32.8624	27.6096	0.102326				GO:0016787	AT1G44820.1	Peptidase M20/M25/M40 family protein
contig31923	13.5047	9.8972	12.097	11.0079	0.132522
contig54166	5.15542	4.07849	4.33543	4.57174	0.101403
contig4480	1.34373	1.14044	1.19683	1.28348	0.0726958
contig6056	21.3285	16.94	15.3256	21.1393	0.161585
contig35028	4.06752	3.10511	4.28569	3.63124	0.138231				GO:0009987	AT5G50920.1	CLPC homologue 1
contig15420	45.0868	30.6522	42.0009	43.6516	0.163221
contig36587	5.10579	5.36896	7.38476	6.20428	0.170495				GO:0005488	AT1G27750.1	nucleic acid binding
contig4855	22.5968	23.4435	28.3852	22.587	0.114782				GO:0005488	AT1G27980.1	dihydrosphingosine phosphate lyase
contig4831	3.30274	3.98252	3.20979	3.28079	0.104886				GO:0005488	AT5G16760.1	Inositol 1 3 4-trisphosphate 5/6-kinase family protein
contig111968	0.508972	0.453338	0.488239	0.397729	0.105288
contig4443	3.3729	3.654	4.61757	3.47922	0.150671				GO:0005622	AT5G25510.1	Protein phosphatase 2A regulatory B subunit family protein
contig39210	9.97541	10.5672	8.80099	8.80469	0.0924363					AT3G54480.1	SKP1/ASK-interacting protein 5
contig104851	1.10133	1.01277	1.07114	0.860516	0.105909
contig42808	11.5791	9.68282	12.118	11.4962	0.094535				GO:0005975	AT4G34260.1	1 2-alpha-L-fucosidases
contig105096	2.59027	2.422	2.87242	2.38996	0.0859362
contig63026	1.74018	1.70438	1.25999	1.3003	0.170671
contig44043	7.29992	7.03992	7.99013	5.81807	0.128771
contig11986	11.137	9.15908	10.1944	10.4066	0.0798954				GO:0005739	AT5G41960.1	unknown protein; FUNCTIONS IN: molecular_function unknown; INVOLVED IN: biological_process unknown; LOCATED IN: chloroplast; EXPRESSED IN: 22 plant structures; EXPRESSED DURING: 13 growth stages; Has 1807 Blast hits to 1807 proteins in 277 species: Archae - 0; Bacteria - 0; Metazoa - 736; Fungi - 347; Plants - 385; Viruses - 0; Other Eukaryotes - 339 (source: NCBI BLink).
contig37801	1.35988	1.20348	1.11128	1.04907	0.114416				GO:0005488	AT2G47390.1	Prolyl oligopeptidase family protein
contig38169	3.89341	3.64565	3.72733	3.80277	0.0280743				GO:0005739	AT3G59820.2	LETM1-like protein
contig23725	11.5235	9.29418	12.3453	13.1432	0.143312				GO:0000166	AT1G50410.1	SNF2 domain-containing protein / helicase domain-containing protein / zinc finger protein-related
contig59402	0.141806	0.127816	0.159633	0.127433	0.109157				GO:0006464	AT4G05200.1	cysteine-rich RLK (RECEPTOR-like protein kinase) 25
contig62473	1.37094	1.07846	1.02236	1.04401	0.144363				GO:0019538	AT1G08750.1	Peptidase C13 family
contig53119	2.75149	2.36081	2.51328	1.79287	0.173084				GO:0009536
contig113683	0.420115	0.420473	0.46937	0.42476	0.05508
contig19605	6.67937	9.12254	9.89938	7.46548	0.178301				GO:0016787	AT3G62260.2	Protein phosphatase 2C family protein
contig70587	3.23845	2.37991	2.7267	2.34251	0.15548					AT1G50910.1	unknown protein; Has 1105 Blast hits to 802 proteins in 217 species: Archae - 2; Bacteria - 177; Metazoa - 445; Fungi - 210; Plants - 58; Viruses - 6; Other Eukaryotes - 207 (source: NCBI BLink).
contig55871	7.9211	5.47425	6.63297	5.64834	0.175064				GO:0016740	AT5G55810.2	nicotinate/nicotinamide mononucleotide adenyltransferase
contig57707	4.0841	3.03462	3.55072	3.5889	0.120287				GO:0005488	AT1G28560.2	snRNA activating complex family protein
contig70772	2.203	1.75449	1.90413	1.76285	0.109905				GO:0016020	AT5G58575.1	CONTAINS InterPro DOMAIN/s: Sgf11 transcriptional regulation (InterPro:IPR013246); Has 30201 Blast hits to 17322 proteins in 780 species: Archae - 12; Bacteria - 1396; Metazoa - 17338; Fungi - 3422; Plants - 5037; Viruses - 0; Other Eukaryotes - 2996 (source: NCBI BLink).
contig87730	2.68436	2.61782	2.18968	2.07025	0.128007
contig43266	5.32862	5.53027	6.36383	4.76626	0.120429					AT3G24860.1	Homeodomain-like superfamily protein
contig14549	22.623	19.2978	22.8767	15.9473	0.161627
contig52160	13.0324	11.7599	10.5477	10.4133	0.106935
contig42933	6.91386	5.81787	6.23334	4.83891	0.145891
contig65404	2.41712	2.02122	2.37926	1.75277	0.147116
contig22691	8.6184	9.59516	6.49418	7.23455	0.173812					AT5G54500.2	flavodoxin-like quinone reductase 1
contig57866	2.44575	2.38783	2.54441	2.25757	0.0497379
contig848	29.6169	32.4757	36.2163	27.6119	0.118655				GO:0005737	AT4G30600.1	signal recognition particle receptor alpha subunit family protein
contig6451	72.2772	68.3181	74.1961	58.9383	0.0991651				GO:0000003	AT1G73030.1	SNF7 family protein
contig27224	14.7886	13.3455	12.0858	11.5338	0.111903					AT4G31430.2	unknown protein; LOCATED IN: plasma membrane; EXPRESSED IN: 25 plant structures; EXPRESSED DURING: 15 growth stages; Has 35333 Blast hits to 34131 proteins in 2444 species: Archae - 798; Bacteria - 22429; Metazoa - 974; Fungi - 991; Plants - 531; Viruses - 0; Other Eukaryotes - 9610 (source: NCBI BLink).
contig48830	7.06489	6.8174	6.80932	5.53619	0.105349				GO:0009605	AT3G55870.1	ADC synthase superfamily protein
contig64190	1.58411	1.2693	1.38482	1.49921	0.0955321
contig19586	30.5718	25.9929	34.8235	24.8602	0.157117				GO:0005488	AT4G13930.1	serine hydroxymethyltransferase 4
contig38001	0.628175	0.532003	0.52181	0.616432	0.0964874
contig29256	22.8359	16.8554	21.7164	23.3218	0.13983				GO:0005739	AT2G25840.2	Nucleotidylyl transferase superfamily protein
contig16061	7.21877	5.36977	7.24101	6.49056	0.133577				GO:0016020	AT4G27860.1	vacuolar iron transporter (VIT) family protein
contig53029	5.42949	4.92008	4.86059	4.14981	0.108722				GO:0005622	AT1G21780.1	BTB/POZ domain-containing protein
contig58663	1.06027	1.13205	0.989831	1.25293	0.101269					AT1G10430.1	protein phosphatase 2A-2
contig29442	4.69268	3.96901	4.23002	4.29684	0.0696361
contig26521	12.4289	10.7204	11.1493	8.95788	0.13266
contig9638	9.63628	9.53136	9.46985	8.17403	0.0749041				GO:0005488	AT3G27260.1	global transcription factor group E8
contig47370	3.89709	3.78305	4.78388	3.76294	0.120379				GO:0006464	AT3G44610.1	Protein kinase superfamily protein
contig5265	7.42946	5.13801	6.27295	5.43464	0.169158					AT1G76405.2	unknown protein; FUNCTIONS IN: molecular_function unknown; INVOLVED IN: biological_process unknown; LOCATED IN: chloroplast envelope; EXPRESSED IN: 21 plant structures; EXPRESSED DURING: 13 growth stages; BEST Arabidopsis thaliana protein match is: unknown protein (TAIR:AT1G20816.1); Has 52 Blast hits to 52 proteins in 19 species: Archae - 0; Bacteria - 0; Metazoa - 0; Fungi - 0; Plants - 50; Vir…
contig18522	9.72107	9.5882	10.8729	7.26075	0.161758				GO:0005622	AT1G26580.1	FUNCTIONS IN: molecular_function unknown; INVOLVED IN: biological_process unknown; LOCATED IN: cellular_component unknown; EXPRESSED IN: 24 plant structures; EXPRESSED DURING: 15 growth stages; BEST Arabidopsis thaliana protein match is: ELM2 domain-containing protein (TAIR:AT2G03470.1); Has 161 Blast hits to 161 proteins in 17 species: Archae - 0; Bacteria - 0; Metazoa - 1; Fungi - 4; Plants - 1…
contig37072	13.6353	12.3223	13.885	9.51394	0.162435
contig106531	1.32606	1.23699	1.28673	0.944234	0.144669
contig69590	1.35383	0.980212	1.33336	1.37551	0.148962
contig41643	27.1659	20.5124	21.0403	20.7595	0.143268
contig37337	9.01209	8.02725	10.2085	7.36324	0.143163					AT1G51130.1	Nse4 component of Smc5/6 DNA repair complex
contig153321	2.49079	2.17162	3.04233	2.32656	0.151294
contig57400	0.392691	0.35235	0.356733	0.347489	0.0568541					AT1G09980.1	Putative serine esterase family protein
contig12096	11.3974	10.134	10.8927	9.28882	0.0882333					AT3G53970.1	proteasome inhibitor-related
contig22947	11.8913	11.3551	12.243	10.1374	0.0807943				GO:0000166	AT5G57940.1	cyclic nucleotide gated channel 5
contig30294	10.0995	9.61375	10.5312	8.22049	0.104316				GO:0009058	AT3G57560.1	N-acetyl-l-glutamate kinase
contig62212	3.82902	3.27442	4.16833	2.98656	0.149568				GO:0016787	AT3G05740.1	RECQ helicase l1
contig21649	11.9093	11.353	10.0902	8.67992	0.136743				GO:0005886	AT2G28370.1	Uncharacterised protein family (UPF0497)
contig16524	22.5076	16.4777	17.2619	18.9262	0.142516
contig27442	25.7832	19.2504	21.5617	25.7313	0.139958				GO:0005737	AT4G08670.1	Bifunctional inhibitor/lipid-transfer protein/seed storage 2S albumin superfamily protein
contig29150	3.40129	2.65569	3.20046	3.2595	0.104419				GO:0005737	AT3G03770.1	Leucine-rich repeat protein kinase family protein
contig53402	10.4059	6.7839	9.39088	8.48388	0.175346				GO:0016020	AT5G08540.1	unknown protein; FUNCTIONS IN: molecular_function unknown; INVOLVED IN: biological_process unknown; LOCATED IN: chloroplast thylakoid membrane chloroplast chloroplast envelope; EXPRESSED IN: 24 plant structures; EXPRESSED DURING: 13 growth stages; Has 30201 Blast hits to 17322 proteins in 780 species: Archae - 12; Bacteria - 1396; Metazoa - 17338; Fungi - 3422; Plants - 5037; Viruses - 0; Other E…
contig43343	6.00095	5.27127	6.00143	5.74882	0.0597881				GO:0005737	AT2G31300.1	actin-related protein C1B
contig31104	15.2903	15.4898	15.7397	13.0652	0.082871				GO:0009536	AT1G09660.1	RNA-binding KH domain-containing protein
contig40041	4.21077	4.34854	3.92022	2.93488	0.165552				GO:0008152	AT4G29890.1	choline monooxygenase putative (CMO-like)
contig93544	2.76592	2.2272	2.25906	2.18803	0.115308
contig23436	24.3721	29.6594	29.3394	25.597	0.0975478				GO:0008152	AT2G21940.4	shikimate kinase 1
contig136080	4.53132	3.9999	4.10623	3.00577	0.165072					AT3G05500.1	Rubber elongation factor protein (REF)
contig51483	4.87024	4.81392	5.46499	4.99891	0.0586925					AT4G33280.1	AP2/B3-like transcriptional factor family protein
contig36404	8.94879	6.56242	7.5959	8.23192	0.129216				GO:0006950	AT3G44340.1	clone eighty-four
contig64151	5.15743	4.30454	4.07478	4.02522	0.119707				GO:0005488	AT4G14965.1	membrane-associated progesterone binding protein 4
contig9959	6.39656	4.41338	5.33214	5.64684	0.150758					AT5G23390.1	Plant protein of unknown function (DUF639)
contig9684	8.08322	8.86807	8.94202	8.92831	0.0477901					AT5G40690.1	CONTAINS InterPro DOMAIN/s: EF-Hand 1 calcium-binding site (InterPro:IPR018247); BEST Arabidopsis thaliana protein match is: unknown protein (TAIR:AT2G41730.1); Has 1807 Blast hits to 1807 proteins in 277 species: Archae - 0; Bacteria - 0; Metazoa - 736; Fungi - 347; Plants - 385; Viruses - 0; Other Eukaryotes - 339 (source: NCBI BLink).
contig16306	2.37899	1.82637	1.97004	2.02934	0.114355					AT5G01850.1	Protein kinase superfamily protein
contig58310	3.1992	2.41456	2.53684	2.24118	0.1612					AT4G04210.1	plant UBX domain containing protein 4
contig34569	3.28941	2.65027	3.51415	3.32996	0.117868					AT3G12640.1	RNA binding (RRM/RBD/RNP motifs) family protein
contig116095	0.715205	0.791142	0.560034	0.598859	0.159344
contig21261	15.8387	14.2088	14.2506	13.7129	0.0636783				GO:0009536	AT3G24740.1	Protein of unknown function (DUF1644)
contig42244	17.7914	16.839	12.4731	15.7748	0.147317
contig59779	3.04426	2.75959	3.61908	3.54129	0.126412				GO:0003824	AT3G03910.1	glutamate dehydrogenase 3
contig34070	19.2404	17.1469	25.1342	18.6377	0.175072				GO:0005488
contig44344	26.5108	22.9898	20.3584	30.6512	0.17759					AT4G33210.1	F-box family protein
contig6596	20.4624	21.3326	22.5642	16.7886	0.122568				GO:0016020	AT1G33230.1	TMPIT-like protein
contig53335	3.90678	3.4383	2.85438	2.95403	0.147423				GO:0000166	AT1G76810.1	eukaryotic translation initiation factor 2 (eIF-2) family protein
contig71112	1.91975	1.54441	1.81064	1.86371	0.0931432
contig5546	27.8208	22.2148	30.0366	25.81	0.125461				GO:0003824	AT5G65750.1	2-oxoglutarate dehydrogenase E1 component
contig41025	7.47429	6.28089	7.67188	8.59292	0.12666					AT3G14910.1	unknown protein; Has 158 Blast hits to 158 proteins in 77 species: Archae - 0; Bacteria - 0; Metazoa - 104; Fungi - 0; Plants - 33; Viruses - 0; Other Eukaryotes - 21 (source: NCBI BLink).
contig330	42.6314	36.9644	46.5518	39.9822	0.0979732				GO:0005829	AT1G80490.2	TOPLESS-related 1
contig5773	31.7908	37.4787	36.8726	25.7028	0.165951				GO:0009058	AT3G12290.1	Amino acid dehydrogenase family protein
contig96955	3.62869	3.80965	3.18603	3.18017	0.0922027
contig25240	1.70242	1.27817	1.56823	1.31985	0.137999				GO:0005618	AT3G26430.1	GDSL-like Lipase/Acylhydrolase superfamily protein
contig9093	6.99863	4.70542	5.63718	5.63739	0.164392				GO:0005737	AT1G72050.2	transcription factor IIIA
contig34665	15.2146	16.356	16.298	11.3691	0.158875				GO:0008152	AT4G21540.1	sphingosine kinase 1
contig15199	4.27478	3.71225	4.5754	3.17605	0.157438					AT3G09670.1	Tudor/PWWP/MBT superfamily protein
contig34717	2.35977	1.5808	1.89488	1.81557	0.170689				GO:0005730	AT1G09760.1	U2 small nuclear ribonucleoprotein A
contig42687	10.9367	7.20612	8.87883	10.2948	0.177506					AT2G43210.1	Ubiquitin-like superfamily protein
contig54539	29.962	29.7169	29.2291	24.7938	0.0858452
contig35431	11.9582	11.2057	11.4276	9.74302	0.085519				GO:0005777	AT1G48320.1	Thioesterase superfamily protein
contig27489	19.0072	15.4446	17.5546	15.5512	0.10144				GO:0003723	AT3G52120.1	SWAP (Suppressor-of-White-APricot)/surp domain-containing protein / D111/G-patch domain-containing protein
contig51881	1.58982	1.73405	2.13971	1.53461	0.156246				GO:0005737	AT1G48440.1	B-cell receptor-associated 31-like
contig47443	15.5797	13.1578	15.2492	14.5414	0.0734019				GO:0005829	AT2G27210.1	BRI1 suppressor 1 (BSU1)-like 3
contig23368	24.8757	22.1767	22.9954	22.6913	0.050759
contig31627	3.6933	2.43841	2.99945	3.61042	0.184053
contig11416	4.92502	4.58868	5.29767	4.27601	0.0920928					AT3G14470.1	NB-ARC domain-containing disease resistance protein
contig8980	25.4131	17.3689	19.9098	19.2797	0.168521				GO:0004872	AT5G56290.1	peroxin 5
contig32232	0.812966	0.601991	0.803605	0.745762	0.131394
contig11444	14.1596	10.7239	9.43413	11.6239	0.17383					AT4G25770.1	alpha/beta-Hydrolases superfamily protein
contig38204	5.43299	3.7457	4.21831	4.206	0.164166				GO:0016020	AT5G46560.1	CONTAINS InterPro DOMAIN/s: Inner nuclear membrane protein MAN1 (InterPro:IPR018996); Has 58 Blast hits to 58 proteins in 29 species: Archae - 0; Bacteria - 4; Metazoa - 11; Fungi - 15; Plants - 20; Viruses - 0; Other Eukaryotes - 8 (source: NCBI BLink).
contig8099	5.45118	4.33817	5.39656	4.57676	0.114728					AT5G43500.1	actin-related protein 9
contig40775	53.0874	41.8105	47.7374	33.8187	0.187367
contig36014	10.9267	7.63339	8.27302	8.50918	0.163243
contig114331	0.179026	0.150924	0.196808	0.189721	0.112596
contig13457	15.1919	10.3983	10.8346	13.8698	0.185336
contig74732	0.146233	0.15186	0.163396	0.140368	0.0652329
contig54343	7.82773	6.32261	5.66997	7.36392	0.144147
contig58839	7.23062	6.89823	6.45912	6.11229	0.0734835				GO:0009536	AT1G59520.3	CW7
contig68291	2.79273	2.43527	2.09904	2.19056	0.130268
contig62324	19.7376	16.1695	17.8735	17.2869	0.0839697
contig22264	5.71764	6.17827	6.00109	5.31637	0.0647928				GO:0016020	AT1G01120.1	3-ketoacyl-CoA synthase 1
contig77131	2.14701	2.28139	1.97739	1.80951	0.0997846
contig1413	2123.97	1751.67	2225.56	1664.97	0.14152				GO:0016020	AT2G24520.1	H(+)-ATPase 5
contig15922	30.0071	30.7454	27.6196	25.8608	0.0784031				GO:0005739	AT2G25570.1	binding
contig104977	0.909136	0.931134	1.03913	0.830627	0.0927386
contig8038	7.42604	5.18883	6.65917	6.71723	0.144621				GO:0006950	AT5G46550.1	DNA-binding bromodomain-containing protein
contig49670	0.392768	0.451189	0.416258	0.526229	0.130434				GO:0006950	AT4G16270.1	Peroxidase superfamily protein
contig21188	5.71782	5.0731	5.84437	4.20289	0.144214					AT2G36810.1	ARM repeat superfamily protein
contig40450	16.5195	17.191	14.6827	13.639	0.105496					AT3G54480.1	SKP1/ASK-interacting protein 5
contig124965	0.968266	0.69498	0.750623	0.85261	0.147361
contig42136	2.96112	2.72181	2.01352	2.64314	0.156373
contig25203	10.4821	11.2415	12.8542	11.0283	0.0894519				GO:0000166	AT5G43930.4	Transducin family protein / WD-40 repeat family protein
contig26924	25.0253	22.7276	22.264	18.0485	0.132072
contig130895	2.05356	1.76893	1.67586	1.43308	0.14798
contig26546	2.76784	2.18889	2.28177	2.81643	0.129014					AT1G31120.1	K+ uptake permease 10
contig100428	0.934511	0.84171	1.02889	0.726866	0.146236
contig26629	1.99339	2.21156	2.99547	2.18933	0.188718				GO:0016740
contig78468	2.05916	1.71481	1.51746	1.47455	0.157556				GO:0009536	AT2G02590.1	FUNCTIONS IN: molecular_function unknown; INVOLVED IN: biological_process unknown; LOCATED IN: chloroplast; EXPRESSED IN: 21 plant structures; EXPRESSED DURING: 13 growth stages; CONTAINS InterPro DOMAIN/s: Putative small multi-drug export (InterPro:IPR009577); Has 405 Blast hits to 405 proteins in 185 species: Archae - 65; Bacteria - 295; Metazoa - 0; Fungi - 0; Plants - 23; Viruses - 0; Other E…
contig43775	18.5393	18.2774	17.1413	12.9581	0.15459				GO:0003824	AT4G12230.1	alpha/beta-Hydrolases superfamily protein
contig34832	12.5649	10.4622	13.765	11.1846	0.122382				GO:0016787	AT1G44820.1	Peptidase M20/M25/M40 family protein
contig30689	5.30535	3.96064	5.2322	4.9621	0.127596				GO:0007275	AT1G28210.2	DNAJ heat shock family protein
contig35349	13.0424	12.4462	12.3336	9.75231	0.122841				GO:0006950	AT5G37370.1	PRP38 family protein
contig49398	1.1549	1.23411	1.18014	0.999461	0.0881685
contig39264	18.3349	13.605	16.0788	14.1604	0.137719
contig12924	25.2147	21.4673	24.7483	18.5337	0.138767				GO:0000166	AT1G06290.1	acyl-CoA oxidase 3
contig13763	2.67745	2.00836	2.57934	2.04342	0.150591
contig42184	6.83355	5.29876	4.87069	4.96128	0.166405					AT1G20930.1	cyclin-dependent kinase B2;2
contig31782	19.199	18.4085	21.7654	15.2425	0.1441				GO:0006810	AT1G03950.1	vacuolar protein sorting-associated protein 2.3
contig24278	8.54325	6.58236	6.50546	8.22095	0.143356				GO:0009056	AT1G50030.1	target of rapamycin
contig48176	0.852137	0.934111	0.740236	0.876622	0.0955709					AT5G45360.1	F-box family protein
contig51127	5.33034	4.28148	4.03633	3.58824	0.171465
contig73885	0.743109	0.902906	0.998152	1.01816	0.137067					AT5G07900.1	Mitochondrial transcription termination factor family protein
contig43944	1.76881	1.54016	1.32895	1.51374	0.117263					AT4G04210.1	plant UBX domain containing protein 4
contig23442	23.6532	22.134	25.3079	16.7969	0.167757					AT1G53400.1	Ubiquitin domain-containing protein
contig73977	10.3775	8.72032	10.038	8.74611	0.0910826				GO:0003824	AT2G46580.1	Pyridoxamine 5'-phosphate oxidase family protein
contig39468	4.75106	3.79977	4.91924	3.756	0.142696
contig5373	17.8369	15.1114	21.3481	16.3368	0.152936				GO:0005886	AT2G19830.1	SNF7 family protein
contig2861	19.3683	16.1656	20.7796	18.9712	0.102703				GO:0016020	AT2G26260.1	3beta-hydroxysteroid-dehydrogenase/decarboxylase isoform 2
contig16356	4.88057	3.06421	3.90432	3.94441	0.187982
contig40866	3.68951	3.59619	3.66569	3.31896	0.0477673				GO:0009536	AT3G02070.1	Cysteine proteinases superfamily protein
contig57640	2.54452	2.06541	2.47369	2.24768	0.0937258				GO:0003824	AT3G55140.1	Pectin lyase-like superfamily protein
contig38445	5.33146	4.09687	4.60264	4.49936	0.111056				GO:0019538	AT4G39370.3	ubiquitin-specific protease 27
contig27444	3.99147	3.27783	3.69482	2.84064	0.145271
contig33011	5.99053	5.53427	5.43695	3.98907	0.165472				GO:0009987	AT5G61540.1	N-terminal nucleophile aminohydrolases (Ntn hydrolases) superfamily protein
contig3595	6.10423	4.25352	5.22398	4.82304	0.152565					AT5G23390.1	Plant protein of unknown function (DUF639)
contig9517	2.8641	2.51204	3.03561	2.30936	0.122977					AT4G32820.2	Tetratricopeptide repeat (TPR)-like superfamily protein
contig66355	0.315273	0.344848	0.285958	0.348577	0.0902814
contig11940	10.4979	8.13086	7.14993	8.79461	0.163007
contig79178	0.299458	0.355356	0.353896	0.276139	0.123733
contig31324	0.708281	0.784891	0.738684	0.653666	0.076305
contig61752	5.35911	3.40614	4.58798	4.90681	0.18288				GO:0005488	AT5G04560.2	HhH-GPD base excision DNA repair family protein
contig6646	5.97772	4.89516	6.13838	4.25513	0.168818					AT3G09670.1	Tudor/PWWP/MBT superfamily protein
contig16999	33.8205	32.0591	34.8205	26.9063	0.110352					AT1G22050.1	membrane-anchored ubiquitin-fold protein 6 precursor
contig13304	12.8054	9.27606	9.49838	9.75014	0.160652				GO:0009987	AT3G27640.1	Transducin/WD40 repeat-like superfamily protein
contig48669	15.8532	11.2223	17.2875	13.5058	0.184305
contig98309	0.75277	0.675205	0.802009	0.946386	0.143762
contig72984	0.645403	0.584821	0.739425	0.530497	0.143262
contig39528	9.19379	6.89637	6.58063	9.52324	0.189364
contig41618	5.83005	4.22229	5.28248	5.41026	0.131866					AT2G44200.1	CBF1-interacting co-repressor CIR N-terminal;Pre-mRNA splicing factor
contig48914	5.65673	4.49625	5.88453	6.7349	0.162125				GO:0005488	AT5G22760.1	PHD finger family protein
contig105601	1.25901	1.23943	1.25075	1.34989	0.0397868
contig39451	0.87433	0.734625	0.659883	0.67861	0.131627					AT1G73370.1	sucrose synthase 6
contig12118	25.374	20.3048	20.8204	24.7763	0.115044				GO:0016301	AT4G24740.1	FUS3-complementing gene 2
contig31369	2.74587	2.706	2.79646	2.27524	0.0912138					AT1G13980.1	sec7 domain-containing protein
contig99976	3.27686	2.56605	2.6295	2.92903	0.114169
contig266	6.4386	5.99515	6.66739	4.64825	0.152185				GO:0016020	AT2G21630.1	Sec23/Sec24 protein transport family protein
contig10634	19.4149	18.3357	20.6229	17.3693	0.0739965				GO:0005829	AT5G05980.1	DHFS-FPGS homolog B
contig51849	8.88847	8.36211	8.95434	8.0255	0.0517438				GO:0009058	AT2G16710.3	Iron-sulphur cluster biosynthesis family protein
contig15214	15.5361	12.0255	10.7846	14.2745	0.163139				GO:0005622	AT1G27840.3	Transducin/WD40 repeat-like superfamily protein
contig47956	5.1631	3.31577	3.73912	4.20422	0.193134
contig20760	11.4425	9.24207	10.0914	10.0609	0.0892774				GO:0005488	AT3G05670.1	RING/U-box protein
contig16320	11.8914	8.21512	10.3877	9.96769	0.149504				GO:0003676	AT2G32980.1	unknown protein; Has 158 Blast hits to 154 proteins in 73 species: Archae - 0; Bacteria - 61; Metazoa - 0; Fungi - 0; Plants - 55; Viruses - 28; Other Eukaryotes - 14 (source: NCBI BLink).
contig3171	31.3515	27.7958	30.552	28.8037	0.0546385				GO:0008152	AT2G43180.1	Phosphoenolpyruvate carboxylase family protein
contig37296	42.2879	44.3051	33.2289	39.6134	0.120917				GO:0016049	AT1G20330.1	sterol methyltransferase 2
contig19853	3.87688	3.38227	3.04838	2.84867	0.136659				GO:0000166	AT3G63480.1	ATP binding microtubule motor family protein
contig30691	9.16	10.1362	11.755	9.1914	0.120967				GO:0009719	AT5G52660.2	Homeodomain-like superfamily protein
contig66976	20.5944	15.6622	21.1803	23.4741	0.162529
contig19998	60.4548	52.5576	62.3782	47.4485	0.124866				GO:0005622	AT3G13340.1	Transducin/WD40 repeat-like superfamily protein
contig10583	42.4049	37.9875	33.3713	43.4706	0.117415
contig29935	14.1307	13.8322	14.5723	11.1985	0.113199				GO:0006810	AT4G30560.1	cyclic nucleotide gated channel 9
contig40630	10.618	8.76389	10.8066	12.2422	0.134546
contig39190	2.14913	1.78883	1.94054	1.35345	0.186453					AT3G58130.1	N-acetylglucosaminylphosphatidylinositol de-N-acetylase family protein
contig76180	16.4809	13.9354	14.1708	10.4402	0.181116
contig46185	14.3905	12.0426	14.4475	12.0571	0.10337				GO:0005856	AT5G53310.1	myosin heavy chain-related
contig5153	11.4858	10.9149	12.7955	13.135	0.087267					AT1G08040.1	Protein of unknown function (DUF707)
contig50023	11.2492	8.48658	9.32188	9.99808	0.119554				GO:0005886	AT4G30790.1	INVOLVED IN: autophagy; EXPRESSED IN: 24 plant structures; EXPRESSED DURING: 15 growth stages; CONTAINS InterPro DOMAIN/s: Autophagy-related protein 17 (InterPro:IPR007240) Autophagy-related protein 11 (InterPro:IPR019460); Has 8793 Blast hits to 6268 proteins in 570 species: Archae - 89; Bacteria - 657; Metazoa - 4844; Fungi - 808; Plants - 441; Viruses - 15; Other Eukaryotes - 1939 (source: NCB…
contig74820	1.0559	0.890494	0.956823	0.694857	0.16946				GO:0005886	AT4G35730.1	Regulator of Vps4 activity in the MVB pathway protein
contig52723	1.20773	0.993248	0.936158	0.934141	0.12727				GO:0016740	AT1G47578.1	Biotin/lipoate A/B protein ligase family
contig3743	27.2672	28.539	33.4125	23.6018	0.143724				GO:0000166	AT3G18820.1	RAB GTPase homolog G3F
contig27784	3.20585	2.80801	2.94141	3.23166	0.0676903				GO:0005488	AT2G40300.1	ferritin 4
contig34116	1.82239	1.18032	1.40881	1.44479	0.181712				GO:0005488	AT4G38180.1	FAR1-related sequence 5
contig113123	0.841092	0.761474	0.7888	0.699066	0.0765168
contig41031	20.6688	15.988	21.7731	17.1642	0.146118				GO:0003677	AT3G07565.4	Protein of unknown function (DUF3755)
contig29838	35.2116	32.3774	30.4716	25.9598	0.125354				GO:0006950	AT5G37370.1	PRP38 family protein
contig31006	1.39115	1.33639	1.07048	1.14409	0.123627
contig43506	5.70877	6.66564	5.94984	4.86336	0.128219
contig43696	10.0061	6.99103	7.77292	7.97201	0.15704				GO:0009536
contig39405	4.43685	4.4924	3.87968	3.19341	0.151247				GO:0005622	AT4G38600.1	HEAT repeat ;HECT-domain (ubiquitin-transferase)
contig47592	0.551693	0.537964	0.571099	0.467112	0.0851992
contig13541	1.65456	1.70343	1.90579	1.39444	0.126383
contig40852	2.10067	2.15838	2.295	1.84	0.0908428				GO:0005737	AT1G72300.1	Leucine-rich receptor-like protein kinase family protein
contig18103	2.63911	2.2243	2.88046	2.24087	0.128196				GO:0005886	AT3G54460.1	SNF2 domain-containing protein / helicase domain-containing protein / F-box family protein
contig46014	14.0766	10.3516	8.94771	11.0164	0.195064
contig4156	14.6566	9.46804	12.6616	13.1469	0.174817				GO:0005975	AT1G65930.1	cytosolic NADP+-dependent isocitrate dehydrogenase
contig17776	17.2618	13.8417	14.522	14.2265	0.104099				GO:0003676
contig26006	4.70756	4.49041	5.0595	4.16901	0.0812521					AT3G54380.1	SAC3/GANP/Nin1/mts3/eIF-3 p25 family
contig135534	0.691821	0.612727	0.616869	0.603626	0.0645544
contig28178	1.76646	1.34448	1.35833	1.21496	0.16829
contig38671	15.42	10.5673	14.7492	12.84	0.162651				GO:0016020	AT2G42780.1	FUNCTIONS IN: molecular_function unknown; INVOLVED IN: regulation of transcription; LOCATED IN: integral to membrane nucleus; EXPRESSED IN: 20 plant structures; EXPRESSED DURING: 11 growth stages; CONTAINS InterPro DOMAIN/s: RNA polymerase II transcription factor SIII subunit A (InterPro:IPR010684); Has 187 Blast hits to 186 proteins in 77 species: Archae - 0; Bacteria - 0; Metazoa - 104; Fungi -…
contig12035	13.6531	11.1799	13.7307	11.5144	0.108709				GO:0005623	AT1G02305.1	Cysteine proteinases superfamily protein
contig80680	1.84656	2.1094	1.89922	1.77413	0.0755743
contig31783	2.45298	1.83609	1.88488	1.88965	0.145042
contig60679	1.05639	0.899256	0.687836	0.886209	0.171149				GO:0016020	AT3G48760.1	DHHC-type zinc finger family protein
contig155115	0.325087	0.303808	0.332453	0.291395	0.0604605
contig81262	2.06188	1.87602	1.71733	1.76519	0.0824945
contig15743	5.28148	5.02589	5.8542	3.97533	0.156192				GO:0005622	AT2G34450.2	HMG-box (high mobility group) DNA-binding family protein
contig36634	5.24189	4.024	5.32356	4.18003	0.146081
contig12879	43.5021	36.35	49.3134	46.5428	0.127055				GO:0005829	AT1G55150.1	DEA(D/H)-box RNA helicase family protein
contig50152	1.06713	0.926217	1.0469	1.0274	0.0615601
contig41175	18.4668	15.411	19.1532	15.6761	0.111177					AT5G45740.1	Ubiquitin domain-containing protein
contig27728	10.5888	7.93148	10.2304	8.42366	0.141217				GO:0006810	AT1G29820.1	Magnesium transporter CorA-like family protein
contig9002	15.0605	11.5777	11.452	11.533	0.142721				GO:0009536	AT4G25070.2	unknown protein; EXPRESSED IN: cultured cell; BEST Arabidopsis thaliana protein match is: unknown protein (TAIR:AT3G48860.2); Has 30201 Blast hits to 17322 proteins in 780 species: Archae - 12; Bacteria - 1396; Metazoa - 17338; Fungi - 3422; Plants - 5037; Viruses - 0; Other Eukaryotes - 2996 (source: NCBI BLink).
contig37219	16.1288	16.8337	21.3194	15.9796	0.144048				GO:0003676	AT5G11200.2	DEAD/DEAH box RNA helicase family protein
contig41906	4.6887	5.01319	6.26327	4.26721	0.169933				GO:0005488	AT4G16490.1	ARM repeat superfamily protein
contig31799	44.627	52.5743	43.779	38.1574	0.1325				GO:0016049	AT1G20330.1	sterol methyltransferase 2
contig30521	3.84573	3.14728	3.66921	3.07862	0.110637
contig9216	10.9215	9.95785	11.4207	7.86787	0.156487				GO:0009605	AT4G08920.1	cryptochrome 1
contig9022	0.74918	0.772416	0.784998	0.7471	0.0241017				GO:0009058	AT5G39990.1	Core-2/I-branching beta-1 6-N-acetylglucosaminyltransferase family protein
contig14243	1.50336	1.34761	1.27776	1.29902	0.0750947
contig57349	7.55978	7.58505	8.06938	7.1797	0.0479834				GO:0016020	AT2G14255.1	Ankyrin repeat family protein with DHHC zinc finger domain
contig55762	6.76873	7.98431	7.78063	6.65892	0.0933523
contig18667	20.7567	17.4212	16.7075	15.2479	0.132976				GO:0005829	AT4G03080.1	BRI1 suppressor 1 (BSU1)-like 1
contig33230	6.54855	6.34222	7.3136	4.57786	0.18668				GO:0005622	AT4G35140.1	Transducin/WD40 repeat-like superfamily protein
contig31524	3.43675	2.17033	3.0073	2.93487	0.182459
contig7902	18.9838	18.0638	22.8115	18.6923	0.109498				GO:0016020	AT1G21790.1	TRAM LAG1 and CLN8 (TLC) lipid-sensing domain containing protein
contig13717	2.70941	2.18081	2.67189	2.30167	0.107286
contig77860	2.66148	2.42207	1.75388	2.73142	0.18631
contig128170	0.684848	0.603646	0.652056	0.606094	0.0613934
contig61910	1.92362	1.40304	2.00975	1.73555	0.152089				GO:0005488	AT3G02890.1	RING/FYVE/PHD zinc finger superfamily protein
contig29313	9.59255	7.82625	6.14071	7.11428	0.189994
contig76710	4.69687	4.67299	5.44144	3.98065	0.126998				GO:0016020	AT2G04620.1	Cation efflux family protein
contig43035	26.4234	21.5887	22.9664	23.1167	0.0872191
contig53063	73.7076	46.4793	66.0211	60.6878	0.186031				GO:0000166	AT2G25760.2	Protein kinase family protein
contig46647	7.20267	7.64714	8.97421	6.05049	0.161793
contig70396	2.57389	2.52929	1.92737	1.9086	0.163928				GO:0006950	AT3G13226.1	regulatory protein RecX family protein
contig8210	6.67733	5.54513	8.18939	8.36777	0.185679
contig12009	4.77198	4.38807	5.22172	4.03605	0.110669				GO:0009536	AT5G10060.1	ENTH/VHS family protein
contig14569	11.1839	8.90074	10.5878	10.0791	0.0951749				GO:0005739	AT3G28430.1	unknown protein; FUNCTIONS IN: molecular_function unknown; INVOLVED IN: biological_process unknown; LOCATED IN: mitochondrion; EXPRESSED IN: 17 plant structures; EXPRESSED DURING: 6 growth stages; CONTAINS InterPro DOMAIN/s: Protein of unknown function FPL (InterPro:IPR019155); Has 243 Blast hits to 233 proteins in 101 species: Archae - 0; Bacteria - 0; Metazoa - 110; Fungi - 0; Plants - 53; Viru…
contig53395	1.53494	1.20891	1.22068	1.0336	0.166958
contig13974	3.10401	2.24184	2.21486	2.62238	0.163441
contig15260	21.6905	21.6607	25.0689	18.6494	0.120498
contig124754	0.41732	0.311176	0.350145	0.372694	0.122178
contig26970	3.77399	3.70889	4.26739	3.51974	0.0834897
contig27485	6.60234	5.27771	4.46311	5.28998	0.163655
contig26644	7.84856	7.58267	6.70402	6.29822	0.102502				GO:0006810	AT1G29690.1	MAC/Perforin domain-containing protein
contig27825	27.8283	20.0357	18.7469	20.9062	0.185747
contig38893	32.4514	35.3881	32.831	22.4968	0.18452
contig67586	14.5114	13.6238	9.85869	11.4131	0.170969
contig135	649.034	679.593	832.884	566.166	0.163464
contig17118	1.42837	1.38414	1.26617	1.67328	0.11902					AT3G04710.1	ankyrin repeat family protein
contig18768	3.61685	3.56916	4.25532	2.85287	0.160434					AT3G03320.1	RNA-binding ASCH domain protein
contig42817	13.0796	12.7037	11.7968	10.6826	0.0884954
contig19687	1.68617	1.08261	1.17762	1.23636	0.206775					AT2G35130.2	Tetratricopeptide repeat (TPR)-like superfamily protein
contig1204	8.30692	7.36185	8.28264	7.33758	0.0697771				GO:0006810	AT3G21580.1	cobalt ion transmembrane transporters
contig77169	0.500818	0.393796	0.538173	0.595498	0.16756
contig65459	1.59791	1.66693	2.02843	2.21312	0.156249
contig5328	8.18265	6.71486	6.25799	7.39591	0.117529				GO:0005622	AT5G47730.1	Sec14p-like phosphatidylinositol transfer family protein
contig44476	0.974711	0.967074	0.979276	0.820564	0.0820251					AT4G38370.1	Phosphoglycerate mutase family protein
contig10126	4.09092	5.05328	5.16619	3.33313	0.196211				GO:0003824	AT1G08200.1	UDP-D-apiose/UDP-D-xylose synthase 2
contig67312	3.26678	3.68063	4.0967	3.56514	0.0941217
contig26953	45.2785	38.9374	31.6694	38.0773	0.144633					AT1G71830.1	somatic embryogenesis receptor-like kinase 1
contig108003	1.56509	1.73426	1.53269	1.21993	0.141729
contig72578	9.87786	7.99947	8.43197	7.74468	0.111915				GO:0005488	AT4G26180.1	Mitochondrial substrate carrier family protein
contig16513	8.14078	6.65079	8.16222	5.90504	0.155762					AT5G58020.1	unknown protein; CONTAINS InterPro DOMAIN/s: Protein of unknown function DUF602 (InterPro:IPR006735); Has 385 Blast hits to 385 proteins in 189 species: Archae - 0; Bacteria - 0; Metazoa - 153; Fungi - 117; Plants - 50; Viruses - 0; Other Eukaryotes - 65 (source: NCBI BLink).
contig33751	12.1845	10.3059	9.21862	10.1053	0.11928				GO:0016020	AT4G14305.1	Peroxisomal membrane 22 kDa (Mpv17/PMP22) family protein
contig53644	3.15957	2.8937	2.30487	2.64231	0.132466
contig90902	1.15832	1.00665	1.10671	1.07983	0.0580869					AT4G29130.1	hexokinase 1
contig1355	7.07492	5.60215	7.67791	5.57606	0.163652				GO:0009056	AT4G16070.1	Mono-/di-acylglycerol lipase N-terminal;Lipase class 3
contig36839	2.55557	2.26684	2.64251	2.00593	0.122376				GO:0008152	AT3G02410.1	alpha/beta-Hydrolases superfamily protein
contig61484	2.95049	2.66333	3.24979	2.39206	0.131261				GO:0003700	AT1G13960.1	WRKY DNA-binding protein 4
contig98954	3.27266	3.38033	3.17722	3.40104	0.0313399				GO:0030246	AT3G61610.1	Galactose mutarotase-like superfamily protein
contig955	3.31154	2.9867	3.26408	2.38994	0.141799				GO:0003700	AT4G38180.1	FAR1-related sequence 5
contig48262	5.04208	5.20903	6.08529	4.79318	0.106367				GO:0005488	AT1G19860.1	Zinc finger C-x8-C-x5-C-x3-H type family protein
contig18514	1.88827	1.72011	1.95899	1.76619	0.0598619
contig12593	2.79859	2.02854	2.40149	2.27042	0.135603
contig25070	19.7547	21.3276	24.0683	21.5122	0.0824038				GO:0006464	AT1G23260.1	MMS ZWEI homologue 1
contig3273	17.6998	15.1996	19.0297	15.3864	0.110304					AT5G16270.1	sister chromatid cohesion 1 protein 4
contig38295	2.19346	2.10465	2.27492	1.91061	0.0737872
contig35633	1.54604	1.66954	1.18673	1.74153	0.160433
contig17826	11.9192	8.94346	9.27001	10.2879	0.132413				GO:0006950	AT1G60490.1	vacuolar protein sorting 34
contig12887	4.12467	3.54483	3.6025	3.44908	0.0823168				GO:0004518	AT3G20420.1	RNAse THREE-like protein 2
contig57556	9.17901	8.68428	8.88401	7.02903	0.114282					AT1G09794.1	Cox19 family protein (CHCH motif)
contig7775	8.87631	6.47418	6.04717	6.80446	0.178149
contig31386	16.1604	12.3612	17.1036	12.7082	0.164633				GO:0008150	AT5G49570.1	peptide-N-glycanase 1
contig28877	10.3245	7.70309	6.81907	7.15292	0.199005
contig78300	1.67647	1.28358	1.45639	1.14504	0.164955					AT5G58920.1	unknown protein; Has 1807 Blast hits to 1807 proteins in 277 species: Archae - 0; Bacteria - 0; Metazoa - 736; Fungi - 347; Plants - 385; Viruses - 0; Other Eukaryotes - 339 (source: NCBI BLink).
contig38989	7.59943	7.32165	8.7675	7.26767	0.0905617					AT4G16144.1	associated molecule with the SH3 domain of STAM 3
contig49721	16.6185	11.5176	13.8731	12.8426	0.157786
contig133767	1.76289	1.68747	1.74053	1.20764	0.16456
contig29906	35.1	21.8802	29.3079	26.6235	0.195389					AT4G02880.2	unknown protein; FUNCTIONS IN: molecular_function unknown; INVOLVED IN: biological_process unknown; LOCATED IN: cellular_component unknown; EXPRESSED IN: 24 plant structures; EXPRESSED DURING: 15 growth stages; BEST Arabidopsis thaliana protein match is: unknown protein (TAIR:AT1G03290.2).
contig61020	1.64617	1.48989	1.98874	1.89124	0.129724				GO:0016020
contig11980	2.17323	1.86532	2.00699	2.20888	0.0769488
contig21920	11.3235	9.3993	8.40324	7.82012	0.166351				GO:0006464	AT4G11670.1	Protein of unknown function (DUF810)
contig25225	22.7608	18.7908	22.7798	25.3647	0.121005				GO:0005488	AT4G28260.1	unknown protein; Has 50 Blast hits to 42 proteins in 12 species: Archae - 0; Bacteria - 0; Metazoa - 1; Fungi - 0; Plants - 49; Viruses - 0; Other Eukaryotes - 0 (source: NCBI BLink).
contig11779	17.443	14.6025	16.2002	16.5726	0.073328				GO:0005488	AT4G37460.1	Tetratricopeptide repeat (TPR)-like superfamily protein
contig111595	0.622395	0.693618	0.739324	0.679983	0.0704587
contig85050	0.846031	0.847854	0.720345	0.621856	0.143866
contig35497	2.75219	2.27471	1.83033	2.27872	0.164819
contig5101	5.2517	5.05758	4.80191	4.83087	0.0423401				GO:0016020	AT2G28110.1	Exostosin family protein
contig12852	2.76885	2.99597	3.13764	2.44132	0.10712					AT2G15730.1	P-loop containing nucleoside triphosphate hydrolases superfamily protein
contig36437	10.4408	8.95588	10.3575	8.56538	0.100204				GO:0016740	AT2G45330.1	RNA 2'-phosphotransferase Tpt1 / KptA family
contig23465	5.37801	5.15814	5.29014	4.71534	0.0573007				GO:0006464	AT4G08500.1	MAPK/ERK kinase kinase 1
contig17866	10.535	9.37331	11.1786	6.9029	0.198383				GO:0005515	AT5G51750.1	subtilase 1.3
contig49573	1.32285	0.880795	1.06337	1.1366	0.166164
contig120035	0.227946	0.253208	0.311387	0.259047	0.133251
contig126078	0.383675	0.272691	0.276429	0.256923	0.195391				GO:0003824
contig38076	8.10661	7.14372	9.2236	6.28829	0.164282				GO:0008219	AT5G61900.1	Calcium-dependent phospholipid-binding Copine family protein
contig31534	4.44256	4.46326	4.27738	3.92592	0.0581138					AT4G39870.1	TLD-domain containing nucleolar protein
contig43378	4.12063	2.86103	2.9856	3.88869	0.182882				GO:0016740	AT5G25150.1	TBP-associated factor 5
contig11038	5.17507	3.74579	4.3724	4.50165	0.131732
contig32225	0.768348	0.842439	0.942421	0.971757	0.106019
contig8095	10.9594	9.10123	13.3785	9.11206	0.190374				GO:0006810	AT2G39480.1	P-glycoprotein 6
contig32063	3.32412	2.82671	2.52996	2.64548	0.123729
contig16376	5.38927	5.31665	6.5408	5.66854	0.0981312				GO:0003824	AT4G11410.1	NAD(P)-binding Rossmann-fold superfamily protein
contig69532	0.331854	0.282892	0.328982	0.283603	0.0888454
contig67546	1.7279	1.98044	2.10614	1.48721	0.150602				GO:0016787	AT5G67170.1	SEC-C motif-containing protein / OTU-like cysteine protease family protein
contig46910	12.583	10.4123	8.57644	11.4784	0.158485					AT5G20020.1	RAS-related GTP-binding nuclear protein 2
contig76670	18.6443	18.5126	21.8103	17.1792	0.103169
contig131349	1.02757	0.839212	0.939686	0.836404	0.100495
contig13726	13.8045	9.78608	10.4773	12.0447	0.155073
contig69030	0.543507	0.355764	0.472555	0.478838	0.168914
contig44471	4.36227	4.85815	4.29894	4.92683	0.0708306
contig23546	6.76952	4.87731	5.33638	5.67879	0.142253
contig21199	3.23979	3.6026	3.06099	3.24816	0.0690036
contig117335	1.17639	1.0855	1.15596	1.07325	0.0454667				GO:0003824	AT1G78910.1	Pseudouridine synthase family protein
contig16542	33.842	27.5579	37.2684	30.8909	0.127923					AT1G27000.1	Protein of unknown function (DUF1664)
contig25795	9.34953	8.82602	9.99667	7.34847	0.127004				GO:0005488	AT4G03080.1	BRI1 suppressor 1 (BSU1)-like 1
contig33953	16.5843	13.1945	17.3682	17.5296	0.125277				GO:0005488	AT1G08110.4	lactoylglutathione lyase family protein / glyoxalase I family protein
contig37171	1.8558	1.21197	1.3872	1.50917	0.18246				GO:0005622	AT5G51230.1	VEFS-Box of polycomb protein
contig79404	8.87122	8.26073	6.54892	9.94985	0.16918				GO:0005215	AT2G40540.1	potassium transporter 2
contig115514	1.86941	1.36099	1.758	1.64246	0.131773
contig27902	12.529	9.06868	8.64117	9.50739	0.177537
contig895	21.0244	25.3794	20.4199	17.5368	0.153589				GO:0008152	AT3G55960.1	Haloacid dehalogenase-like hydrolase (HAD) superfamily protein
contig51183	4.00969	4.67155	4.63317	3.96206	0.0892786				GO:0007275	AT2G29900.1	Presenilin-2
contig18357	6.5007	7.05681	7.23505	5.22023	0.140038				GO:0016020	AT2G26600.1	Glycosyl hydrolase superfamily protein
contig15901	8.15824	6.45469	7.85923	7.71252	0.0995099				GO:0016020	AT4G38360.2	Protein of unknown function (DUF300)
contig58460	2.33089	1.6462	1.98526	1.70506	0.163374
contig2585	10.4477	8.60831	10.8679	8.84319	0.116867				GO:0016740	AT5G19485.1	transferases;nucleotidyltransferases
contig31389	8.72204	8.45136	10.6528	7.79891	0.137782					AT5G65910.1	BSD domain-containing protein
contig11250	13.2566	9.29887	9.93721	10.1509	0.165832				GO:0003700	AT5G44180.1	Homeodomain-like transcriptional regulator
contig19359	24.9327	17.7386	21.5126	28.4855	0.198756
contig90693	2.41217	1.99577	2.166	2.14001	0.0793433
contig18494	1.97523	1.46165	1.45154	2.11454	0.196718					AT5G37030.1	P-loop containing nucleoside triphosphate hydrolases superfamily protein
contig39803	7.61658	4.50859	6.90836	6.37173	0.209416
contig20424	9.50692	8.51367	9.9089	7.59107	0.117159				GO:0005488	AT3G02280.1	Flavodoxin family protein
contig87653	1.60704	1.07338	1.32474	1.38612	0.162839
contig68933	4.62451	4.6228	4.87224	3.09345	0.189392					AT5G66290.1	unknown protein; FUNCTIONS IN: molecular_function unknown; INVOLVED IN: N-terminal protein myristoylation; LOCATED IN: cellular_component unknown; EXPRESSED IN: 14 plant structures; EXPRESSED DURING: 7 growth stages; Has 1807 Blast hits to 1807 proteins in 277 species: Archae - 0; Bacteria - 0; Metazoa - 736; Fungi - 347; Plants - 385; Viruses - 0; Other Eukaryotes - 339 (source: NCBI BLink).
contig36040	14.2356	11.167	11.018	13.8065	0.13546				GO:0005618	AT2G18080.1	Serine carboxypeptidase S28 family protein
contig38841	17.8974	18.9353	20.6571	16.7333	0.0897176
contig37723	1.71974	1.6724	1.63614	1.10534	0.18744
contig13714	5.54641	4.27926	3.79423	4.39572	0.164792
contig55419	7.4077	7.30082	8.27348	7.43115	0.0592351				GO:0016020	AT1G67410.1	Exostosin family protein
contig42209	20.43	14.8427	20.4079	15.7593	0.166768					AT4G00990.1	Transcription factor jumonji (jmjC) domain-containing protein
contig39637	7.00205	4.87997	4.70291	6.70103	0.205774
contig135820	1.45322	1.43233	1.06146	1.44596	0.141951
contig20276	25.7676	29.4908	28.0232	37.1149	0.163509
contig36682	4.71325	3.60232	4.02962	4.1543	0.111025
contig3569	7.48671	8.32638	9.60798	6.62855	0.158458					AT5G47310.1	PPPDE putative thiol peptidase family protein
contig39529	1.67171	1.46241	1.61667	1.06073	0.189992
contig3274	17.1685	15.5437	19.6641	14.9222	0.125808					AT5G16270.1	sister chromatid cohesion 1 protein 4
contig17429	10.775	6.8911	9.12833	9.15683	0.177538				GO:0003676	AT5G35910.1	Polynucleotidyl transferase ribonuclease H fold protein with HRDC domain
contig3096	8.20611	8.38229	7.51507	9.03935	0.0756127				GO:0016020	AT1G67410.1	Exostosin family protein
contig57336	7.22909	6.16561	7.85546	5.9755	0.130866				GO:0009058	AT2G16710.3	Iron-sulphur cluster biosynthesis family protein
contig1777	9.41332	8.07037	8.11298	10.9137	0.147245
contig6595	17.3962	17.4516	20.7808	14.494	0.146579				GO:0016020	AT1G33230.1	TMPIT-like protein
contig15558	10.2184	9.1279	11.6653	10.1594	0.101342				GO:0016020	AT5G20350.1	Ankyrin repeat family protein with DHHC zinc finger domain
contig54157	8.49386	10.8131	10.4084	7.41173	0.172965					AT3G24315.1	Sec20 family protein
contig91701	1.20505	0.941526	0.986043	0.874947	0.142656				GO:0009536	AT3G47590.1	alpha/beta-Hydrolases superfamily protein
contig99790	1.38492	0.938597	1.08789	1.13936	0.16306
contig67334	4.10823	3.67644	3.47324	3.51931	0.0783195
contig11510	3.60085	3.36474	4.18106	2.82574	0.160822					AT3G14470.1	NB-ARC domain-containing disease resistance protein
contig57600	2.82259	2.68189	3.05825	2.59517	0.07249				GO:0004872	AT1G60800.1	NSP-interacting kinase 3
contig9882	24.738	22.9183	32.9087	28.9287	0.163173				GO:0005829	AT3G22960.1	Pyruvate kinase family protein
contig105768	6.00834	4.1643	4.77834	4.18933	0.180449
contig72236	2.86276	1.78178	2.14588	2.53093	0.20107					AT2G21790.1	ribonucleotide reductase 1
contig2735	7.66356	6.285	7.4727	7.86268	0.0968138					AT3G21430.2	DNA binding
contig163699	0.434858	0.459506	0.62823	0.514447	0.168887				GO:0006810	AT5G52450.1	MATE efflux family protein
contig84814	0.550841	0.488391	0.628357	0.513521	0.111943
contig66988	2.09598	2.04001	2.16942	2.18383	0.0315736				GO:0016787	AT5G47435.2	formyltetrahydrofolate deformylase putative
contig7690	7.92275	5.62204	6.32268	6.85149	0.145166					AT3G24870.1	Helicase/SANT-associated DNA binding protein
contig108063	0.900926	0.612934	0.708135	0.732782	0.162267					AT5G43310.1	COP1-interacting protein-related
contig25147	10.4296	9.58308	10.6724	7.28611	0.162591				GO:0016020	AT2G21630.1	Sec23/Sec24 protein transport family protein
contig108982	0.624366	0.437714	0.424332	0.421024	0.206775				GO:0005623	AT1G62710.1	beta vacuolar processing enzyme
contig33400	11.8056	9.224	8.87277	10.7766	0.134596
contig88639	0.630767	0.521314	0.608658	0.393142	0.200189
contig148882	3.43301	2.67701	2.13513	2.43135	0.208068
contig28382	0.9813	0.735005	0.901962	1.07335	0.155502					AT3G26980.1	membrane-anchored ubiquitin-fold protein 4 precursor
contig32327	4.06512	2.95955	2.93651	2.79649	0.184432
contig82535	4.82159	3.56346	4.4675	3.8484	0.137189				GO:0016301	AT5G13280.1	aspartate kinase 1
contig101423	6.56885	5.01392	4.70742	5.68985	0.150172					AT3G02560.1	Ribosomal protein S7e family protein
contig34290	3.59468	2.99863	2.99654	3.1966	0.088054				GO:0003824	AT5G41480.1	Folylpolyglutamate synthetase family protein
contig19431	4.99782	3.63607	4.88073	4.03522	0.150297
contig48353	31.5716	22.3013	27.0113	22.6024	0.168812
contig28624	17.2939	10.8507	15.5663	15.6206	0.186967
contig3419	197.857	256.646	252.89	210.871	0.129033				GO:0030234	AT3G12490.2	cystatin B
contig57220	2.64445	2.51002	2.56634	1.825	0.158536
contig80124	1.5556	1.09884	1.39506	1.65716	0.170843
contig94474	0.905316	0.613962	0.719776	0.781954	0.161176
contig113828	1.97462	1.52201	1.37945	1.54426	0.160084				GO:0005488	AT1G05890.2	RING/U-box superfamily protein
contig154069	1.62371	1.9062	1.94377	2.02563	0.0931709
contig38526	20.2302	13.0923	14.308	19.1879	0.211337				GO:0016787	AT5G56730.1	Insulinase (Peptidase family M16) protein
contig13177	9.28493	9.7886	10.7892	7.76417	0.134046
contig9232	9.40268	5.96354	6.48545	7.30459	0.207615
contig22087	2.19548	1.61488	2.31424	1.93796	0.153757				GO:0005886	AT3G03140.1	Tudor/PWWP/MBT superfamily protein
contig62329	1.63107	1.42469	1.88084	1.44932	0.131998
contig9164	10.4524	8.99389	11.056	9.31112	0.0970257				GO:0006519	AT3G49680.1	branched-chain aminotransferase 3
contig62340	7.00805	5.41674	6.68229	7.30389	0.12577				GO:0016043	AT1G04050.1	homolog of SU(var)3-9 1
contig5260	12.8336	11.1734	13.7121	10.8932	0.110811				GO:0005215	AT2G39890.1	proline transporter 1
contig27110	12.4472	9.10966	9.91628	9.15493	0.15467
contig79067	2.00971	1.66275	1.51164	1.63905	0.124989
contig3773	7.13682	7.7661	7.1934	4.96609	0.182229				GO:0005622
contig10924	14.2186	9.33728	12.0581	14.883	0.19813
contig15162	10.2937	8.03796	12.5898	11.8438	0.188085				GO:0008289	AT2G15900.1	Phox-associated domain;Phox-like;Sorting nexin C-terminal
contig6278	12.1904	9.22501	10.1525	11.3918	0.122218				GO:0006464	AT2G43080.1	P4H isoform 1
contig16180	15.2066	13.6106	17.3894	11.4194	0.175118					AT3G52250.1	Duplicated homeodomain-like superfamily protein
contig92180	3.18471	2.60897	3.54173	3.28164	0.124765
contig101939	2.43019	2.08396	2.08279	1.44148	0.205279				GO:0005783	AT1G05360.1	BEST Arabidopsis thaliana protein match is: SNARE associated Golgi protein family (TAIR:AT4G14950.1); Has 332 Blast hits to 326 proteins in 115 species: Archae - 0; Bacteria - 11; Metazoa - 174; Fungi - 0; Plants - 74; Viruses - 0; Other Eukaryotes - 73 (source: NCBI BLink).
contig57505	1.0909	0.888326	0.939326	0.871402	0.105406
contig111948	2.74842	1.86293	2.55877	2.58584	0.16116
contig84237	1.99873	1.89404	1.81592	1.31934	0.171449				GO:0005739	AT5G07900.1	Mitochondrial transcription termination factor family protein
contig108601	0.303655	0.335777	0.402497	0.456012	0.18207
contig4270	63.9678	67.8263	70.6371	50.2192	0.143307				GO:0009607	AT5G01650.2	Tautomerase/MIF superfamily protein
contig52387	1.52297	1.16973	1.33578	1.33528	0.107645
contig67204	9.06994	6.36857	8.52654	8.77449	0.150409
contig95524	2.18845	1.78173	2.3437	1.69823	0.155839				GO:0005886	AT1G16360.1	LEM3 (ligand-effect modulator 3) family protein / CDC50 family protein
contig78545	2.01526	1.64015	1.77581	1.61116	0.104693
contig42107	19.1534	12.3411	18.6836	18.7704	0.18973				GO:0005488	AT5G21990.1	Tetratricopeptide repeat (TPR)-like superfamily protein
contig142420	3.82681	4.81579	3.9243	3.70625	0.124439
contig52433	7.67525	8.18804	8.90922	6.49358	0.130094				GO:0008289	AT3G43230.1	RING/FYVE/PHD-type zinc finger family protein
contig19021	9.81855	7.24658	9.42856	7.77214	0.145863					AT5G66810.1	CONTAINS InterPro DOMAIN/s: CTLH C-terminal LisH motif (InterPro:IPR006595); BEST Arabidopsis thaliana protein match is: LisH and RanBPM domains containing protein (TAIR:AT1G61150.1); Has 333 Blast hits to 242 proteins in 88 species: Archae - 0; Bacteria - 0; Metazoa - 104; Fungi - 47; Plants - 152; Viruses - 0; Other Eukaryotes - 30 (source: NCBI BLink).
contig31177	3.097	2.64244	3.76674	3.72696	0.163102				GO:0030234	AT5G12150.1	Rho GTPase activation protein (RhoGAP) with PH domain
contig57532	3.2006	3.42732	3.81151	2.29758	0.201821
contig4333	41.7803	41.6931	45.1719	35.2532	0.101135				GO:0008150	AT4G30920.1	Cytosol aminopeptidase family protein
contig55713	2.62507	1.87907	1.69977	2.16914	0.19293
contig18294	0.619992	0.524848	0.537815	0.618973	0.0889288
contig115810	2.35327	1.73105	1.66839	1.95095	0.160753
contig8783	9.49925	6.81055	6.6313	8.9974	0.184771				GO:0005739	AT2G39340.1	SAC3/GANP/Nin1/mts3/eIF-3 p25 family
contig47620	7.94329	7.97193	7.90138	5.80767	0.143935				GO:0016787	AT3G50950.2	HOPZ-ACTIVATED RESISTANCE 1
contig57017	2.38266	2.09059	2.43167	1.83587	0.126909
contig81401	0.323763	0.356471	0.284735	0.30859	0.0943589
contig159836	1.05644	0.889127	0.808566	1.17307	0.167108
contig49683	2.10636	1.70734	1.621	1.71846	0.121051					AT4G33530.1	K+ uptake permease 5
contig48097	16.2258	16.1595	20.0474	14.5585	0.139175				GO:0005737	AT2G35420.1	RING/U-box superfamily protein
contig141998	0.249604	0.27499	0.264793	0.236525	0.0659071
contig12714	56.8513	62.6463	63.9001	43.4468	0.16506				GO:0003824	AT5G43940.2	GroES-like zinc-binding dehydrogenase family protein
contig50274	17.0191	13.268	11.0509	16.4061	0.193368
contig23566	6.7818	5.0793	5.9555	6.58603	0.125686				GO:0003676	AT4G31180.1	Class II aminoacyl-tRNA and biotin synthetases superfamily protein
contig7122	12.9977	12.1168	12.8779	11.4544	0.0582243				GO:0005737	AT1G63690.2	SIGNAL PEPTIDE PEPTIDASE-LIKE 2
contig47981	2.40485	1.80815	1.89242	1.69961	0.160166				GO:0003824	AT1G56345.1	Pseudouridine synthase family protein
contig65204	1.53658	1.2245	1.10559	1.14912	0.155285
contig104630	1.18747	0.952163	0.886709	1.13126	0.137513
contig6877	1.73881	1.96579	1.36852	2.28359	0.209439
contig2697	11.9072	10.1375	12.8261	9.03814	0.155564				GO:0003824	AT3G10370.1	FAD-dependent oxidoreductase family protein
contig8388	14.2115	11.6183	11.8363	16.24	0.16212					AT1G15780.1	unknown protein; BEST Arabidopsis thaliana protein match is: unknown protein (TAIR:AT2G10440.1); Has 103701 Blast hits to 43153 proteins in 1828 species: Archae - 30; Bacteria - 7385; Metazoa - 38639; Fungi - 11531; Plants - 7727; Viruses - 307; Other Eukaryotes - 38082 (source: NCBI BLink).
contig26265	1.75485	1.16792	1.31409	1.31601	0.183021
contig44257	2.39007	2.17555	2.61177	2.10635	0.0984239					AT3G24490.1	Alcohol dehydrogenase transcription factor Myb/SANT-like family protein
contig97442	0.798106	0.890136	0.762931	0.577171	0.173545
contig124588	1.08547	0.976125	1.26585	1.01354	0.118562
contig29041	3.96587	3.97386	5.07494	3.39872	0.170949					AT3G46710.1	NB-ARC domain-containing disease resistance protein
contig12730	6.38512	4.01059	5.12793	4.91901	0.191431				GO:0003700	AT2G35530.1	basic region/leucine zipper transcription factor 16
contig54553	7.43409	9.06844	10.1254	7.29178	0.160532				GO:0005488	AT3G29270.1	RING/U-box superfamily protein
contig115844	3.71925	2.92143	2.94782	3.84702	0.146708
contig27121	10.7713	7.60612	11.2566	8.77198	0.178149					AT3G23440.1	embryo sac development arrest 6
contig44763	1.82367	1.63614	1.60274	1.49413	0.0836576				GO:0009536	AT5G07950.1	unknown protein; FUNCTIONS IN: molecular_function unknown; INVOLVED IN: biological_process unknown; LOCATED IN: chloroplast; EXPRESSED IN: 20 plant structures; EXPRESSED DURING: 9 growth stages; Has 30201 Blast hits to 17322 proteins in 780 species: Archae - 12; Bacteria - 1396; Metazoa - 17338; Fungi - 3422; Plants - 5037; Viruses - 0; Other Eukaryotes - 2996 (source: NCBI BLink).
contig31744	3.00804	2.34624	2.97837	2.19024	0.161001					AT4G05450.1	mitochondrial ferredoxin 1
contig49328	3.54587	3.7807	4.15352	2.93759	0.141527
contig4584	16.4631	17.2698	19.3662	17.5884	0.0693087				GO:0005975	AT3G55260.1	beta-hexosaminidase 1
contig56836	6.01295	5.73532	6.15587	5.46769	0.0522135				GO:0005840	AT4G26060.1	Ribosomal protein L18ae family
contig4204	24.5005	26.5942	26.9929	21.9251	0.0929903				GO:0016787	AT1G27770.1	autoinhibited Ca2+-ATPase 1
contig23213	27.5967	24.4295	32.6683	22.5365	0.165242				GO:0005886	AT5G47540.1	Mo25 family protein
contig39228	9.13205	8.11466	8.70135	6.01238	0.17307
contig31885	5.77958	4.62544	6.40758	4.83314	0.153873				GO:0003676	AT5G47430.1	DWNN domain a CCHC-type zinc finger
contig51291	2.50883	2.05518	2.26905	1.9958	0.105478					AT5G65560.1	Pentatricopeptide repeat (PPR) superfamily protein
contig69922	5.40618	3.79975	4.74934	3.95318	0.166678					AT5G55100.2	SWAP (Suppressor-of-White-APricot)/surp domain-containing protein
contig2825	4.92608	4.15892	3.70854	4.24982	0.117979				GO:0006950	AT3G13226.1	regulatory protein RecX family protein
contig10244	2.41952	2.02327	2.24077	2.58415	0.103935
contig45383	4.66249	3.82257	3.16734	4.28189	0.161526
contig12006	42.646	42.413	39.4368	34.5526	0.0947585
contig6540	113.296	87.4727	95.3361	104.406	0.111633
contig66614	12.8187	8.78584	11.0305	11.1617	0.151243
contig987	19.3427	14.2322	16.8813	18.6009	0.131434				GO:0003824	AT5G02310.1	proteolysis 6
contig1938	30.9073	27.9076	30.7145	34.2075	0.0833079				GO:0009058	AT5G66120.2	3-dehydroquinate synthase putative
contig58621	0.993834	0.874937	0.943198	0.673837	0.161182					AT5G20520.1	alpha/beta-Hydrolases superfamily protein
contig62771	1.44474	1.57362	1.05775	1.1249	0.191068				GO:0016020	AT5G09220.1	amino acid permease 2
contig44346	18.1086	18.8123	14.8303	21.1479	0.143175
contig8638	3.81547	3.97076	4.50733	3.14844	0.144967				GO:0016043	AT3G04380.1	SET-domain containing protein lysine methyltransferase family protein
contig102383	1.03472	0.744198	0.83971	1.02915	0.157853
contig3245	9.57469	9.87354	11.0177	10.225	0.0612286					AT5G13020.1	Emsy N Terminus (ENT)/ plant Tudor-like domains-containing protein
contig19132	3.58506	2.41317	2.49235	2.88802	0.188259
contig89566	1.88275	1.67163	1.50678	1.30838	0.153217				GO:0016301
contig107489	1.62655	1.62296	1.76237	1.68019	0.0388907					AT5G60390.1	GTP binding Elongation factor Tu family protein
contig21909	11.7923	9.41596	12.2299	12.4707	0.122205				GO:0005886	AT3G19340.1	Protein of unknown function (DUF3754)
contig8171	0.049597	0.0370155	0.0515235	0.057728	0.177461				GO:0005622	AT3G27640.1	Transducin/WD40 repeat-like superfamily protein
contig138754	2.17451	1.92921	2.08637	1.73212	0.0980667
contig44016	6.99501	4.63992	5.76524	5.72462	0.166491
contig12121	4.61919	4.19389	5.00143	3.95961	0.103831				GO:0016787	AT5G03455.1	Rhodanese/Cell cycle control phosphatase superfamily protein
contig26044	4.57774	3.93544	5.1257	3.89342	0.133653				GO:0016740	AT5G45760.1	Transducin/WD40 repeat-like superfamily protein
contig81968	0.841798	0.582539	0.690371	0.65041	0.158799				GO:0003824
contig46119	25.0668	24.8284	21.6412	16.381	0.184072
contig60839	4.95538	4.39249	5.37875	5.03334	0.0827421
contig111986	2.6065	2.63057	2.43751	2.49796	0.035793
contig27450	4.29119	3.35414	4.18507	3.90594	0.106602				GO:0009908	AT5G23150.1	Tudor/PWWP/MBT domain-containing protein
contig7026	60.9636	62.8771	71.9961	61.3629	0.0808175				GO:0005488
contig97178	3.73509	3.45455	4.32	2.76255	0.181275
contig96364	0.614828	0.472267	0.620958	0.547837	0.123289
contig10001	15.1362	14.0489	15.2245	11.3572	0.129398				GO:0003824	AT5G62980.1	Dihydroneopterin aldolase
contig14219	3.01633	2.68345	2.9292	2.24654	0.12689				GO:0008152	AT4G16566.1	histidine triad nucleotide-binding 4
contig31336	2.1164	1.69049	2.24041	1.93093	0.119977					AT4G33690.1	unknown protein; FUNCTIONS IN: molecular_function unknown; INVOLVED IN: biological_process unknown; LOCATED IN: chloroplast; EXPRESSED IN: pollen tube; Has 543 Blast hits to 512 proteins in 106 species: Archae - 0; Bacteria - 0; Metazoa - 281; Fungi - 54; Plants - 72; Viruses - 0; Other Eukaryotes - 136 (source: NCBI BLink).
contig135866	0.91362	0.643158	0.693002	0.68055	0.167266				GO:0000003	AT4G20060.1	ARM repeat superfamily protein
contig47125	4.05585	4.05976	3.6765	2.70834	0.175737				GO:0005829	AT5G18590.1	Galactose oxidase/kelch repeat superfamily protein
contig13323	2.65368	2.30845	2.52331	2.16546	0.0902685
contig4436	6.2416	4.7727	6.01969	4.23025	0.182571				GO:0008289	AT1G15240.2	Phox-associated domain;Phox-like;Sorting nexin C-terminal
contig38807	1.0227	0.968063	1.05119	0.988842	0.0364305
contig2592	7.94417	6.45272	8.76316	7.23534	0.129846				GO:0005488	AT3G08505.2	zinc finger (CCCH-type/C3HC4-type RING finger) family protein
contig3472	12.2603	8.63803	10.1127	8.08848	0.190732
contig59680	43.4588	27.6547	40.2807	44.6969	0.199976
contig80369	1.04848	0.974366	0.991122	0.731277	0.14987
contig26855	1.1393	0.799466	1.06585	0.988164	0.146417
contig96146	0.470871	0.44628	0.534484	0.413425	0.109824
contig73943	0.579432	0.552688	0.489066	0.708592	0.158375					AT1G55810.1	uridine kinase-like 3
contig40322	4.65257	3.3417	3.64892	3.61361	0.150889
contig79279	6.49522	5.49061	5.93539	4.23986	0.173176				GO:0009987	AT2G30600.5	BTB/POZ domain-containing protein
contig103980	0.632953	0.511856	0.40829	0.477041	0.185278
contig27997	3.34814	2.99983	2.65487	2.92284	0.0958299
contig67009	1.78955	1.7822	1.80475	1.26212	0.159786
contig138507	1.34951	1.96527	1.36995	1.61199	0.182118				GO:0005215	AT1G34580.1	Major facilitator superfamily protein
contig32092	10.2125	9.8135	10.5359	6.70272	0.189688				GO:0003676	AT3G13440.1	S-adenosyl-L-methionine-dependent methyltransferases superfamily protein
contig24209	6.52941	7.98263	7.55137	5.79654	0.141998					AT1G55475.1	unknown protein; FUNCTIONS IN: molecular_function unknown; INVOLVED IN: biological_process unknown; LOCATED IN: endomembrane system; BEST Arabidopsis thaliana protein match is: unknown protein (TAIR:AT3G13480.1); Has 35333 Blast hits to 34131 proteins in 2444 species: Archae - 798; Bacteria - 22429; Metazoa - 974; Fungi - 991; Plants - 531; Viruses - 0; Other Eukaryotes - 9610 (source: NCBI BLink…
contig97250	0.675024	0.573148	0.6583	0.498294	0.136108
contig47803	2.95696	2.75742	2.05505	2.77162	0.15078
contig13478	29.2324	18.9509	24.7019	19.7434	0.20656					AT4G02880.2	unknown protein; FUNCTIONS IN: molecular_function unknown; INVOLVED IN: biological_process unknown; LOCATED IN: cellular_component unknown; EXPRESSED IN: 24 plant structures; EXPRESSED DURING: 15 growth stages; BEST Arabidopsis thaliana protein match is: unknown protein (TAIR:AT1G03290.2).
contig157977	0.287101	0.254696	0.295424	0.266848	0.0673956
contig55411	26.9617	21.6114	25.6332	20.5009	0.131248
contig89585	5.74712	4.17377	4.26998	5.62734	0.171225
contig36188	3.07519	3.13727	2.77682	2.59416	0.0881822
contig37756	4.76943	4.33882	5.12663	3.38364	0.170961				GO:0008152	AT5G01710.1	methyltransferases
contig46083	2.57482	2.01025	2.28991	1.80989	0.153551				GO:0009058
contig25637	14.4624	11.3728	13.5941	10.8733	0.137285				GO:0003677
contig33686	0.319235	0.410088	0.312005	0.250727	0.203344
contig116033	0.384378	0.447238	0.567506	0.555289	0.180162
contig19103	2.73886	3.26808	2.94131	2.34528	0.136777				GO:0006464	AT2G45590.1	Protein kinase superfamily protein
contig9471	4.63468	4.88303	5.38996	4.48686	0.0817095					AT3G62240.1	RING/U-box superfamily protein
contig1419	8.78453	6.8505	6.04761	6.80699	0.163961
contig38111	2.34512	2.20257	2.60685	1.97381	0.116157				GO:0016787	AT3G56690.1	Cam interacting protein 111
contig8096	6.86165	10.6254	9.46427	9.94172	0.178347				GO:0006464	AT3G62260.2	Protein phosphatase 2C family protein
contig98593	4.20013	4.02791	3.63325	2.9739	0.146779				GO:0016020	AT3G04460.1	peroxin-12
contig89343	0.730574	0.569483	0.574335	0.553109	0.136707
contig37412	9.71775	6.10177	9.86728	8.52092	0.203583				GO:0003677	AT2G03780.1	Translin family protein
contig100478	0.591553	0.378643	0.489022	0.516086	0.1786
contig41869	4.41193	2.77992	4.05595	3.72112	0.187271					AT1G50620.1	RING/FYVE/PHD zinc finger superfamily protein
contig11501	9.57034	6.93611	9.21519	9.66494	0.145628
contig40191	5.42246	4.08325	4.15207	4.22458	0.142531
contig38555	5.37439	4.70871	5.41225	4.09972	0.12718					AT4G17540.1	unknown protein; Has 30201 Blast hits to 17322 proteins in 780 species: Archae - 12; Bacteria - 1396; Metazoa - 17338; Fungi - 3422; Plants - 5037; Viruses - 0; Other Eukaryotes - 2996 (source: NCBI BLink).
contig76357	5.10513	3.17313	4.01037	3.86445	0.197983
contig25703	2.48902	1.86624	2.2971	2.28529	0.11753				GO:0007165	AT3G24650.1	AP2/B3-like transcriptional factor family protein
contig12097	11.0517	10.1923	13.6376	10.0557	0.147916					AT3G53970.1	proteasome inhibitor-related
contig38591	14.2536	10.8335	11.7417	15.9871	0.178177				GO:0005737
contig53831	7.61776	5.48891	7.24338	5.86107	0.158138				GO:0005488	AT4G38120.1	ARM repeat superfamily protein
contig761	26.0111	23.4343	26.8128	20.0504	0.12655				GO:0016020	AT3G56740.1	Ubiquitin-associated (UBA) protein
contig44999	3.71202	2.89065	3.9629	3.08684	0.148534
contig49681	1.51697	1.3108	1.71675	1.59501	0.111092				GO:0003824	AT5G51030.1	NAD(P)-binding Rossmann-fold superfamily protein
contig12262	1.59076	1.20148	1.67332	1.44385	0.140086
contig5164	4.2582	4.08415	4.44906	4.40762	0.0384831
contig20970	18.3434	20.2289	25.2923	18.6361	0.156112				GO:0006464	AT5G41340.1	ubiquitin conjugating enzyme 4
contig123311	1.62004	1.67292	1.5116	1.06665	0.187856
contig61347	8.85882	8.96521	7.33393	7.2462	0.115803				GO:0009987	AT5G61540.1	N-terminal nucleophile aminohydrolases (Ntn hydrolases) superfamily protein
contig52650	1.26625	0.871711	0.822033	0.927331	0.206761				GO:0009536	AT3G02070.1	Cysteine proteinases superfamily protein
contig25763	20.9163	18.6423	16.6069	19.0904	0.0940697				GO:0005829	AT1G02080.1	transcription regulators
contig38655	4.04403	3.09813	3.50847	2.49148	0.199637				GO:0005488	AT2G36810.1	ARM repeat superfamily protein
contig21121	12.6585	10.1671	10.922	8.77877	0.152068
contig18603	10.452	10.3685	11.6285	8.62616	0.120463				GO:0005654	AT5G48630.2	Cyclin family protein
contig49150	2.32909	2.35226	2.39106	1.74044	0.14051				GO:0005829	AT1G08410.1	P-loop containing nucleoside triphosphate hydrolases superfamily protein
contig21634	2.65394	2.42266	3.00109	2.71164	0.0882014				GO:0030234	AT5G12150.1	Rho GTPase activation protein (RhoGAP) with PH domain
contig10886	11.2685	9.75864	11.6146	8.5305	0.138423				GO:0016787	AT2G03270.1	DNA-binding protein putative
contig13604	5.27395	4.19113	4.74535	4.43649	0.100157
contig28303	15.2234	13.0641	12.7294	12.9743	0.0858705
contig24242	55.075	36.8769	44.4877	42.914	0.16887				GO:0016301	AT4G24740.1	FUS3-complementing gene 2
contig26073	17.4295	13.5794	14.5782	15.5827	0.107423
contig40242	2.84134	3.07873	2.98262	1.91654	0.197603
contig13866	5.40801	3.8984	4.30239	4.67492	0.140421
contig53111	3.75968	2.43071	2.98946	2.75651	0.189527					AT5G07900.1	Mitochondrial transcription termination factor family protein
contig138692	2.0966	1.69814	1.58348	1.42753	0.167996
contig6131	4.07058	2.7658	3.06002	3.34774	0.168929
contig4166	2.39483	1.77503	2.18976	1.54904	0.194529
contig145974	2.24589	1.93225	2.14995	1.62452	0.13865				GO:0005739	AT1G21920.1	Histone H3 K4-specific methyltransferase SET7/9 family protein
contig42650	1.76488	1.16096	1.37882	1.27522	0.187938
contig60261	10.506	8.43906	8.65565	9.24162	0.100729
contig71506	0.858834	0.678696	0.708285	0.705233	0.110877				GO:0016301	AT5G21170.2	5'-AMP-activated protein kinase beta-2 subunit protein
contig38851	33.8639	24.5002	23.1405	23.3028	0.196318
contig57818	25.4041	20.9966	20.8465	25.6074	0.114101				GO:0003824	AT3G03330.1	NAD(P)-binding Rossmann-fold superfamily protein
contig36015	17.7178	12.4602	17.5461	15.5425	0.154637				GO:0000003	AT1G60170.1	pre-mRNA processing ribonucleoprotein binding region-containing protein
contig16437	7.06743	4.82919	5.97862	6.50629	0.156519
contig8446	5.80896	5.10447	5.44052	6.87322	0.13208					AT2G44200.1	CBF1-interacting co-repressor CIR N-terminal;Pre-mRNA splicing factor
contig24925	16.1858	16.5344	16.2811	10.597	0.192767				GO:0003824	AT2G39410.2	alpha/beta-Hydrolases superfamily protein
contig52722	10.4225	9.59405	11.015	7.22395	0.174119				GO:0016020	AT4G00550.1	digalactosyl diacylglycerol deficient 2
contig19482	6.92914	4.5785	5.8158	5.60495	0.168145				GO:0016787
contig39197	12.558	12.6291	12.2874	9.1947	0.141846					AT1G78070.1	Transducin/WD40 repeat-like superfamily protein
contig15382	5.00887	4.01623	4.9336	5.1004	0.105707					AT1G17450.2	B-block binding subunit of TFIIIC
contig67750	17.319	12.8525	11.8931	14.1782	0.168244				GO:0000166	AT4G12020.2	protein kinase family protein
contig59168	1.58514	1.68453	1.69901	1.40431	0.0852011				GO:0003824	AT1G78910.1	Pseudouridine synthase family protein
contig68201	0.73373	0.81379	0.7344	0.992854	0.149065
contig83413	1.13395	0.869323	1.08704	0.945664	0.121684					AT2G18040.1	peptidylprolyl cis/trans isomerase NIMA-interacting 1
contig60247	5.9648	4.5111	4.68446	4.32974	0.152374
contig51068	2.31499	2.33492	2.8308	1.62942	0.216715				GO:0009719	AT1G17440.1	Transcription initiation factor TFIID subunit A
contig49600	1.26932	1.25903	1.42964	1.36935	0.0615843
contig19357	11.5402	9.35691	10.4389	7.26117	0.189093				GO:0003824	AT5G07360.1	Amidase family protein
contig14090	3.15583	2.73534	2.31117	2.39768	0.144783
contig47654	14.6622	10.0038	12.0513	12.342	0.155494				GO:0005886	AT5G07980.1	dentin sialophosphoprotein-related
contig14764	2.54962	1.62763	1.66546	1.88255	0.221213
contig20578	39.7693	27.9813	36.9508	35.2276	0.143751				GO:0006950	AT1G49670.2	ARP protein (REF)
contig101198	3.3215	2.16431	2.32593	2.45588	0.201413
contig37730	4.73425	3.12271	4.08121	3.43371	0.18628				GO:0016043	AT2G22740.2	SU(VAR)3-9 homolog 6
contig40640	19.6843	15.6403	18.7265	13.713	0.162821
contig18250	3.36774	2.76529	3.2588	3.20621	0.0840868				GO:0005622	AT5G52230.1	methyl-CPG-binding domain protein 13
contig57361	1.54224	1.14529	1.35792	1.15532	0.145186				GO:0003700	AT4G35550.1	WUSCHEL related homeobox 13
contig13816	1.40236	0.962331	1.20327	1.02437	0.172387					AT5G27620.1	cyclin H;1
contig97997	2.54479	2.27915	1.97212	1.79045	0.1553
contig77646	0.676456	0.512832	0.746627	0.625745	0.153716
contig89790	0.606722	0.462228	0.430034	0.507076	0.153386
contig8627	22.2464	17.5861	24.5834	15.4477	0.209721
contig563	9.35608	7.49257	7.6923	5.71128	0.19709				GO:0006350	AT1G70060.1	SIN3-like 4
contig4631	10.9572	8.83408	11.3876	10.7706	0.107946				GO:0005886	AT1G34320.1	Protein of unknown function (DUF668)
contig56873	11.4343	8.22461	10.1924	7.51328	0.192435				GO:0005622	AT1G80500.1	SNARE-like superfamily protein
contig40326	4.59482	3.79892	3.35964	3.93382	0.130369				GO:0005515	AT2G31530.1	SecY protein transport family protein
contig6599	27.8612	21.6518	28.176	29.4824	0.130576				GO:0016020	AT1G30470.1	SIT4 phosphatase-associated family protein
contig33349	4.15799	3.36209	3.39559	3.72274	0.101091				GO:0016787	AT5G48370.1	Thioesterase/thiol ester dehydrase-isomerase superfamily protein
contig693	4.17356	2.92465	3.55805	4.17934	0.1614				GO:0006464	AT3G53090.1	ubiquitin-protein ligase 7
contig106208	1.66765	1.18966	1.19767	1.08049	0.203587
contig16378	17.3993	10.7321	12.9338	13.0738	0.206184				GO:0005488
contig60182	13.7305	11.3294	12.908	10.6639	0.115875
contig65489	2.62636	1.84379	1.7032	2.07581	0.196976				GO:0005488	AT3G20800.1	Cell differentiation Rcd1-like protein
contig6452	36.0096	40.5313	47.8566	29.209	0.204026				GO:0000003	AT1G73030.1	SNF7 family protein
contig15346	3.25284	2.45698	3.26523	2.54807	0.152174
contig105365	1.06143	0.802917	0.952117	0.695277	0.183858
contig48592	4.36532	3.51203	4.24701	3.34229	0.133054				GO:0005488	AT3G22370.1	alternative oxidase 1A
contig51547	2.50985	2.05289	2.18772	3.08156	0.186239
contig9428	21.9643	19.5387	22.1981	19.2349	0.0754059				GO:0006810	AT1G05940.1	cationic amino acid transporter 9
contig14192	2.18949	2.0159	1.94028	1.57665	0.133633				GO:0005622	AT5G10710.2	INVOLVED IN: chromosome segregation cell division; LOCATED IN: chromosome centromeric region nucleus; EXPRESSED IN: 23 plant structures; EXPRESSED DURING: 13 growth stages; CONTAINS InterPro DOMAIN/s: Centromere protein Cenp-O (InterPro:IPR018464); Has 43 Blast hits to 43 proteins in 15 species: Archae - 0; Bacteria - 0; Metazoa - 11; Fungi - 0; Plants - 31; Viruses - 0; Other Eukaryotes - 1 (sou…
contig90564	3.88282	4.24773	3.07603	3.72633	0.131139
contig4435	6.1665	4.38768	5.64194	4.29145	0.181421				GO:0005488	AT1G15240.2	Phox-associated domain;Phox-like;Sorting nexin C-terminal
contig21559	26.0296	19.6991	20.8878	17.9504	0.164355				GO:0005215	AT2G34690.1	Glycolipid transfer protein (GLTP) family protein
contig16448	14.7134	14.2383	16.0815	13.1552	0.0833907				GO:0008152	AT4G24160.1	alpha/beta-Hydrolases superfamily protein
contig81111	2.13195	1.69037	1.97435	1.81116	0.101203
contig56490	0.536269	0.494544	0.555414	0.656824	0.122867				GO:0016301	AT3G59410.2	protein kinase family protein
contig46731	4.4801	5.17302	6.2168	4.34826	0.169179				GO:0005622	AT5G25510.1	Protein phosphatase 2A regulatory B subunit family protein
contig71822	0.877017	0.764792	0.805723	0.701643	0.0934313					AT3G59490.2	unknown protein; FUNCTIONS IN: molecular_function unknown; INVOLVED IN: biological_process unknown; EXPRESSED IN: 22 plant structures; EXPRESSED DURING: 13 growth stages; Has 30201 Blast hits to 17322 proteins in 780 species: Archae - 12; Bacteria - 1396; Metazoa - 17338; Fungi - 3422; Plants - 5037; Viruses - 0; Other Eukaryotes - 2996 (source: NCBI BLink).
contig56064	3.94509	3.54441	3.60412	4.10745	0.0711404
contig28124	2.80254	2.42881	3.06231	2.91015	0.0964012				GO:0009908	AT4G02560.1	Homeodomain-like superfamily protein
contig96629	0.639596	0.580981	0.782525	0.711421	0.128823
contig74872	1.99018	1.38165	1.85079	1.72207	0.150028					AT4G15090.1	FRS (FAR1 Related Sequences) transcription factor family
contig11614	4.20389	3.02294	4.56062	3.45323	0.183427				GO:0009856	AT1G71820.2	SEC6
contig49086	14.428	10.3831	14.3054	10.7579	0.176254				GO:0016740	AT2G45330.1	RNA 2'-phosphotransferase Tpt1 / KptA family
contig85660	1.13607	1.13502	1.28514	0.891136	0.146751
contig72636	1.11318	0.7814	0.855855	0.74315	0.190709				GO:0003676	AT1G26370.1	RNA helicase family protein
contig57796	10.7809	8.34864	11.8866	8.16104	0.187418				GO:0016020	AT3G58600.1	Adaptin ear-binding coat-associated protein 1 NECAP-1
contig20579	7.9885	5.49309	6.94448	5.89092	0.170452				GO:0003723	AT5G25060.1	RNA recognition motif (RRM)-containing protein
contig6677	84.412	105.888	119.305	75.7566	0.206253				GO:0005829	AT3G52880.2	monodehydroascorbate reductase 1
contig32773	6.24361	6.41186	8.58758	6.89131	0.152372				GO:0005198	AT2G45140.1	plant VAP homolog 12
contig40002	2.06027	1.46547	2.01974	1.85489	0.146675				GO:0016787	AT4G18550.1	alpha/beta-Hydrolases superfamily protein
contig26972	35.8998	30.5032	34.9073	32.4872	0.0726905				GO:0005829	AT5G58220.1	transthyretin-like protein
contig33315	4.89378	4.15176	4.65069	3.15021	0.183321				GO:0008152	AT4G02405.1	S-adenosyl-L-methionine-dependent methyltransferases superfamily protein
contig10291	6.00401	5.92284	7.28934	5.43932	0.128269				GO:0016787	AT1G22620.1	Phosphoinositide phosphatase family protein
contig54777	7.24247	7.55388	8.96268	5.20702	0.21392				GO:0005622
contig11120	14.8072	9.15237	10.6511	12.3303	0.206618				GO:0003723	AT3G50670.1	U1 small nuclear ribonucleoprotein-70K
contig81550	1.07815	1.05039	0.952408	0.841193	0.10955				GO:0005737	AT1G13200.1	F-box and associated interaction domains-containing protein
contig44027	7.26091	5.08431	6.11749	5.09737	0.175581				GO:0006810	AT3G13090.1	multidrug resistance-associated protein 8
contig56	23.0506	18.1437	19.3401	19.3488	0.106646				GO:0006464	AT3G17205.1	ubiquitin protein ligase 6
contig90187	0.331118	0.37475	0.259273	0.323831	0.147782				GO:0004872	AT2G24720.1	glutamate receptor 2.2
contig42939	4.65993	4.20049	4.80372	4.08785	0.0782742
contig31976	8.41929	9.19214	9.79055	7.27484	0.12526				GO:0003700	AT1G13450.1	Homeodomain-like superfamily protein
contig45150	11.2898	9.22471	12.0158	9.32354	0.134327				GO:0008219	AT5G61900.1	Calcium-dependent phospholipid-binding Copine family protein
contig45746	10.0752	6.93506	7.24868	9.41398	0.185362
contig49105	2.75175	1.90551	2.65378	2.24547	0.163196				GO:0005488	AT2G33835.1	Zinc finger C-x8-C-x5-C-x3-H type family protein
contig107588	1.39171	1.24669	1.57309	1.20434	0.123098					AT1G74410.1	RING/U-box superfamily protein
contig4499	2.0434	1.41689	2.0708	1.58964	0.184045				GO:0005515	AT3G43920.2	dicer-like 3
contig92415	3.2885	3.60562	3.82015	2.78256	0.133618
contig1060	23.7373	24.2362	25.332	18.2397	0.138447				GO:0005623	AT5G62810.1	peroxin 14
contig41988	9.60549	8.58665	8.20412	7.20444	0.118164				GO:0005739	AT4G23160.1	cysteine-rich RLK (RECEPTOR-like protein kinase) 8
contig15179	26.5353	23.9306	29.9475	21.0222	0.14979				GO:0009056	AT2G02380.1	glutathione S-transferase (class zeta) 2
contig18081	15.1059	10.335	10.0002	11.7441	0.197707
contig26007	11.7168	9.27695	11.244	8.17017	0.164896				GO:0005829	AT1G79260.1	CONTAINS InterPro DOMAIN/s: Domain of unknown function DUF1794 (InterPro:IPR014878); Has 30201 Blast hits to 17322 proteins in 780 species: Archae - 12; Bacteria - 1396; Metazoa - 17338; Fungi - 3422; Plants - 5037; Viruses - 0; Other Eukaryotes - 2996 (source: NCBI BLink).
contig13110	3.32584	3.14761	4.15205	3.17504	0.137519					AT1G11950.1	Transcription factor jumonji (jmjC) domain-containing protein
contig6529	6.44324	5.36531	7.42721	6.14538	0.134358				GO:0005488	AT1G61140.1	SNF2 domain-containing protein / helicase domain-containing protein / zinc finger protein-related
contig20067	2.06583	1.66935	2.08265	1.66386	0.125885				GO:0005739
contig38490	1.01926	0.795762	0.899808	0.83647	0.109844					AT1G43760.1	DNAse I-like superfamily protein
contig57853	2.74554	1.94011	2.52631	2.17755	0.152663					AT2G36490.1	demeter-like 1
contig55641	8.9818	6.59131	5.69663	8.89829	0.2195
contig34846	2.41539	1.75811	1.9403	1.55403	0.19189				GO:0016787	AT1G05790.1	lipase class 3 family protein
contig28768	10.2206	10.0143	10.5263	7.82917	0.127534
contig90088	2.90659	2.37941	2.51371	2.20499	0.119291				GO:0005739	AT1G07040.1	unknown protein; INVOLVED IN: biological_process unknown; LOCATED IN: chloroplast; EXPRESSED IN: 24 plant structures; EXPRESSED DURING: 14 growth stages; BEST Arabidopsis thaliana protein match is: unknown protein (TAIR:AT1G27030.1); Has 540 Blast hits to 538 proteins in 187 species: Archae - 0; Bacteria - 333; Metazoa - 0; Fungi - 0; Plants - 67; Viruses - 0; Other Eukaryotes - 140 (source: NCBI…
contig8148	10.6089	10.0364	10.6513	12.1287	0.0822927					AT1G15780.1	unknown protein; BEST Arabidopsis thaliana protein match is: unknown protein (TAIR:AT2G10440.1); Has 103701 Blast hits to 43153 proteins in 1828 species: Archae - 30; Bacteria - 7385; Metazoa - 38639; Fungi - 11531; Plants - 7727; Viruses - 307; Other Eukaryotes - 38082 (source: NCBI BLink).
contig39976	6.0643	7.46366	8.20453	5.17164	0.202841				GO:0006464	AT3G23610.3	dual specificity protein phosphatase 1
contig45664	21.2713	17.9124	19.8936	24.8918	0.140176
contig21454	20.5461	15.3619	24.8655	20.231	0.191851				GO:0003700	AT4G26640.2	WRKY family transcription factor family protein
contig35055	2.00629	1.88888	2.24412	2.2419	0.0845575				GO:0016020	AT2G40935.1	PLAC8 family protein
contig22683	92.1305	74.5332	88.0674	91.0493	0.0939905				GO:0016787	AT5G54140.1	IAA-leucine-resistant (ILR1)-like 3
contig32934	6.92624	4.65129	4.30651	5.00749	0.224221				GO:0005739	AT1G35510.1	O-fucosyltransferase family protein
contig62566	1.16501	0.775164	0.943634	1.07865	0.1717
contig28526	1.0248	0.734534	0.830598	0.659714	0.194391				GO:0005737	AT4G23160.1	cysteine-rich RLK (RECEPTOR-like protein kinase) 8
contig70730	3.33314	3.85697	4.05831	3.44438	0.0929991
contig35639	5.1523	4.2447	5.38998	4.02743	0.142102				GO:0005488	AT1G61690.1	phosphoinositide binding
contig105688	1.15906	0.727781	0.888627	1.00145	0.192746
contig30976	4.69222	3.08065	4.60469	3.60967	0.19607				GO:0005488	AT3G08880.1	unknown protein; BEST Arabidopsis thaliana protein match is: unknown protein (TAIR:AT5G01570.1); Has 177 Blast hits to 175 proteins in 60 species: Archae - 4; Bacteria - 33; Metazoa - 18; Fungi - 11; Plants - 59; Viruses - 0; Other Eukaryotes - 52 (source: NCBI BLink).
contig35648	0.917322	0.651582	0.81158	0.829644	0.137969
contig19922	14.4451	11.3878	13.2049	10.1789	0.153858				GO:0005623	AT5G47780.1	galacturonosyltransferase 4
contig30386	0.10578	0.0788493	0.0867278	0.0962294	0.126976				GO:0000166	AT2G45540.2	WD-40 repeat family protein / beige-related
contig36224	0.930079	0.803372	0.899459	0.789474	0.0814549
contig31422	7.74239	6.0902	5.58675	8.47482	0.195017				GO:0005737	AT5G18640.1	alpha/beta-Hydrolases superfamily protein
contig23440	3.03144	2.23643	2.50088	2.41414	0.134346
contig77217	7.83521	5.89011	7.10338	6.73575	0.11737
contig88610	6.98623	5.39714	7.05923	8.69157	0.191274
contig6600	27.1871	21.3596	28.3022	28.9587	0.131285				GO:0016020	AT1G30470.1	SIT4 phosphatase-associated family protein
contig16645	12.0314	7.88238	9.6678	8.11648	0.202662					AT5G13560.1	unknown protein; BEST Arabidopsis thaliana protein match is: unknown protein (TAIR:AT2G37370.1); Has 12055 Blast hits to 8846 proteins in 811 species: Archae - 217; Bacteria - 1046; Metazoa - 6104; Fungi - 1115; Plants - 528; Viruses - 14; Other Eukaryotes - 3031 (source: NCBI BLink).
contig51366	7.64421	6.54327	5.71203	4.53525	0.215102
contig25331	3.33205	2.50071	2.59612	2.45571	0.151206
contig35358	4.85601	3.42125	3.10608	3.36019	0.214856					AT3G46220.2	unknown protein; INVOLVED IN: biological_process unknown; EXPRESSED IN: 24 plant structures; EXPRESSED DURING: 13 growth stages; CONTAINS InterPro DOMAIN/s: Protein of unknown function DUF2042 (InterPro:IPR018611).
contig87878	1.42862	1.12964	1.1862	1.14859	0.113556
contig27865	1.84709	2.26576	1.75343	1.66352	0.141467				GO:0016020	AT5G45380.1	solute:sodium symporters;urea transmembrane transporters
contig46708	0.833021	0.769068	0.707227	0.510923	0.197489
contig8268	2.93667	2.28703	2.90782	2.75047	0.110399
contig117564	0.315399	0.33223	0.343671	0.261688	0.115822				GO:0004518	AT2G36490.1	demeter-like 1
contig49665	17.5999	16.8801	16.9537	15.5632	0.0510025				GO:0004872	AT1G75760.1	ER lumen protein retaining receptor family protein
contig43922	12.1976	11.1415	9.84153	8.37083	0.159252				GO:0019538
contig8842	1.84541	1.46591	1.70367	1.32539	0.147269				GO:0005886	AT4G33110.1	S-adenosyl-L-methionine-dependent methyltransferases superfamily protein
contig33458	2.95184	2.47804	3.2075	2.46728	0.131727				GO:0019538	AT5G53350.1	CLP protease regulatory subunit X
contig13642	9.37404	7.75319	11.3264	7.32729	0.203003				GO:0003723	AT3G04610.1	RNA-binding KH domain-containing protein
contig38498	1.90162	1.22841	1.57577	1.22229	0.21921				GO:0005829	AT4G36080.1	phosphotransferases alcohol group as acceptor;binding;inositol or phosphatidylinositol kinases
contig58543	1.945	1.63064	1.58982	1.62583	0.0976478
contig10604	54.7414	59.5964	80.4972	66.6965	0.171429					AT5G39570.1	FUNCTIONS IN: molecular_function unknown; INVOLVED IN: biological_process unknown; LOCATED IN: cytosol nucleus; EXPRESSED IN: 25 plant structures; EXPRESSED DURING: 14 growth stages; BEST Arabidopsis thaliana protein match is: glycine-rich protein (TAIR:AT3G29075.1); Has 30201 Blast hits to 17322 proteins in 780 species: Archae - 12; Bacteria - 1396; Metazoa - 17338; Fungi - 3422; Plants - 5037; …
contig38514	10.3837	7.36999	6.81646	7.51147	0.199967
contig46169	17.352	15.6178	13.9365	12.2236	0.149049					AT2G15695.1	Protein of unknown function DUF829 transmembrane 53
contig14314	5.98023	4.46842	4.06698	3.90245	0.205764
contig32737	63.5235	69.791	71.8618	41.3757	0.226574
contig105114	6.82532	4.88889	4.12056	6.19667	0.222805
contig92581	0.486166	0.406877	0.503482	0.506488	0.098334
contig23364	5.65028	4.66485	6.11543	4.74798	0.133358				GO:0005515	AT3G05520.2	Subunits of heterodimeric actin filament capping protein Capz superfamily
contig25969	4.21683	3.71847	4.62798	2.74363	0.212244					AT4G38260.1	Protein of unknown function (DUF833)
contig24764	2.24576	1.58615	1.92527	1.5132	0.185528				GO:0006810	AT5G09550.1	GDP dissociation inhibitor family protein / Rab GTPase activator family protein
contig27413	2.12797	2.35688	2.23587	1.58108	0.165066
contig64395	4.1135	3.20784	3.55622	3.43922	0.107425
contig61472	1.70885	1.47074	1.22408	1.11543	0.192064				GO:0016020	AT5G14040.1	phosphate transporter 3;1
contig27057	4.16551	3.56968	4.13721	2.92974	0.157426				GO:0005829	AT2G26570.1	Plant protein of unknown function (DUF827)
contig104885	1.56373	1.70248	1.83352	1.215	0.168689
contig23799	1.35035	1.07751	1.18131	1.17445	0.0947809
contig16689	8.6685	6.67263	8.19324	7.5629	0.110986				GO:0003723	AT5G25060.1	RNA recognition motif (RRM)-containing protein
contig9637	14.1178	14.6331	13.8036	12.9087	0.0522087				GO:0005488	AT3G27260.1	global transcription factor group E8
contig50154	1.75998	1.31141	1.77457	1.5015	0.140141				GO:0008135	AT5G10630.2	Translation elongation factor EF1A/initiation factor IF2gamma family protein
contig138271	1.37108	0.998372	1.00569	1.01975	0.165454
contig7297	43.3066	43.7119	55.6679	35.2821	0.188823				GO:0005737	AT3G10410.1	SERINE CARBOXYPEPTIDASE-LIKE 49
contig97328	0.83139	0.94682	0.682467	0.783701	0.135299				GO:0005975	AT4G30310.2	FGGY family of carbohydrate kinase
contig1154	3.68898	2.85857	2.5516	3.02938	0.158452
contig61823	12.5808	10.0677	9.30933	7.23865	0.225172				GO:0006810	AT1G60030.1	nucleobase-ascorbate transporter 7
contig16211	1.77724	1.42411	1.47929	1.43199	0.109827
contig19484	15.1846	17.308	17.5366	14.6223	0.0912721				GO:0005886	AT2G26510.1	Xanthine/uracil permease family protein
contig74786	2.02465	1.4493	1.5238	1.66503	0.153377				GO:0040029	AT5G20320.1	dicer-like 4
contig9418	2.93108	3.02412	3.18622	2.24893	0.144963
contig50731	11.1366	8.02102	10.3767	9.62642	0.135939					AT5G58510.1	unknown protein; FUNCTIONS IN: molecular_function unknown; INVOLVED IN: biological_process unknown; LOCATED IN: chloroplast; EXPRESSED IN: 23 plant structures; EXPRESSED DURING: 14 growth stages; BEST Arabidopsis thaliana protein match is: unknown protein (TAIR:AT5G55060.2); Has 30201 Blast hits to 17322 proteins in 780 species: Archae - 12; Bacteria - 1396; Metazoa - 17338; Fungi - 3422; Plants …
contig48781	11.403	9.9158	11.7419	10.9125	0.0723114				GO:0005737	AT5G20680.1	TRICHOME BIREFRINGENCE-LIKE 16
contig62376	4.05863	5.51362	5.1809	3.57257	0.200029				GO:0007275	AT1G08700.1	Presenilin-1
contig4983	8.89022	6.43868	7.68984	7.88979	0.13029					AT3G05680.2	embryo defective 2016
contig98354	1.28876	0.925521	1.02362	0.746311	0.227306
contig32552	1.76044	1.5368	1.585	1.28509	0.127313				GO:0016787	AT2G05920.1	Subtilase family protein
contig24366	9.56251	10.0112	11.2376	7.8607	0.144547				GO:0016787	AT4G39120.1	myo-inositol monophosphatase like 2
contig20568	34.0982	31.2073	31.5872	27.326	0.0900733				GO:0009607	AT5G10270.1	cyclin-dependent kinase C;1
contig11082	15.9972	14.9646	14.5948	13.7395	0.0630993				GO:0016740	AT3G60910.1	S-adenosyl-L-methionine-dependent methyltransferases superfamily protein
contig23080	11.7461	11.3307	14.446	14.3549	0.128109				GO:0000003	AT1G74960.2	fatty acid biosynthesis 1
contig12773	9.22475	5.96306	7.16956	7.40471	0.181					AT4G38180.1	FAR1-related sequence 5
contig72383	4.48169	3.63543	4.40058	2.91377	0.190744
contig25610	0.456194	0.420614	0.539821	0.389813	0.143399
contig31398	8.53527	5.34799	8.38067	6.59718	0.211243					AT3G45830.1	unknown protein; FUNCTIONS IN: molecular_function unknown; INVOLVED IN: biological_process unknown; LOCATED IN: cellular_component unknown; EXPRESSED IN: 24 plant structures; EXPRESSED DURING: 15 growth stages; BEST Arabidopsis thaliana protein match is: unknown protein (TAIR:AT1G02290.1); Has 499 Blast hits to 438 proteins in 100 species: Archae - 0; Bacteria - 7; Metazoa - 236; Fungi - 15; Plan…
contig48667	3.19981	2.82179	2.53257	2.10205	0.174058
contig54325	1.67983	1.55507	1.51181	1.02582	0.199
contig38167	18.8122	15.4243	12.8996	15.58	0.154555				GO:0003676	AT1G66810.1	Zinc finger C-x8-C-x5-C-x3-H type family protein
contig42023	3.40811	2.75638	3.94545	3.21426	0.147815					AT2G17350.1	unknown protein; Has 119 Blast hits to 93 proteins in 40 species: Archae - 0; Bacteria - 3; Metazoa - 18; Fungi - 12; Plants - 44; Viruses - 0; Other Eukaryotes - 42 (source: NCBI BLink).
contig9839	4.86809	5.0259	5.57223	3.62578	0.172254				GO:0005488	AT5G42940.1	RING/U-box superfamily protein
contig27295	24.5545	15.3543	21.8517	19.7411	0.190626
contig11924	2.5121	1.84547	2.308	2.42796	0.130781
contig69445	1.45674	1.26015	1.40201	1.35939	0.0606912
contig38075	15.6564	12.3703	16.3821	12.9339	0.138109				GO:0008219	AT5G61900.1	Calcium-dependent phospholipid-binding Copine family protein
contig1136	1.70234	1.37546	1.244	1.18302	0.168418
contig48861	3.68233	2.74626	3.04071	2.43912	0.178174
contig58467	3.75604	2.88446	3.08331	2.64347	0.154582					AT2G20320.1	DENN (AEX-3) domain-containing protein
contig19580	27.3438	22.4387	31.8841	24.0175	0.15808				GO:0008152	AT4G05530.1	indole-3-butyric acid response 1
contig25062	4.90827	3.64756	3.90479	3.87919	0.137319
contig71488	0.983672	0.898274	1.16195	0.819673	0.15205				GO:0005488	AT2G32630.1	Pentatricopeptide repeat (PPR-like) superfamily protein
contig96191	0.619321	0.632819	0.621075	0.609637	0.0153206					AT2G33620.1	AT hook motif DNA-binding family protein
contig56256	14.7241	12.2508	10.424	9.21828	0.205618					AT1G60030.1	nucleobase-ascorbate transporter 7
contig39129	7.13079	8.92002	9.41732	7.06812	0.14901				GO:0016740	AT3G20650.1	mRNA capping enzyme family protein
contig61699	3.51925	2.54529	3.0861	2.35473	0.183857
contig80578	2.68851	1.85382	2.08417	2.21675	0.159218
contig12619	15.9513	16.1766	19.1356	12.8445	0.160375				GO:0009536	AT3G48060.1	BAH domain ;TFIIS helical bundle-like domain
contig10043	44.1962	44.0295	55.6342	42.6997	0.129363				GO:0009536	AT1G01090.1	pyruvate dehydrogenase E1 alpha
contig76226	3.78023	3.07129	4.40042	3.72978	0.145008
contig73894	1.69489	1.21114	1.61895	1.25486	0.171182
contig17727	5.63772	3.42924	3.9292	4.76627	0.218471
contig9017	8.66931	6.64199	8.42368	7.07557	0.12923				GO:0005739	AT2G04340.1	unknown protein; Has 24 Blast hits to 24 proteins in 10 species: Archae - 0; Bacteria - 0; Metazoa - 0; Fungi - 0; Plants - 24; Viruses - 0; Other Eukaryotes - 0 (source: NCBI BLink).
contig67908	2.91416	3.01573	2.17571	2.21439	0.173143
contig43194	8.13928	6.2189	6.14383	7.91971	0.15076
contig19126	7.4402	6.81209	9.53344	6.48963	0.18073				GO:0003700	AT5G45710.1	winged-helix DNA-binding transcription factor family protein
contig39246	5.4655	4.00848	5.24115	4.22212	0.153323				GO:0005488	AT4G16390.1	pentatricopeptide (PPR) repeat-containing protein
contig40899	3.85782	4.15826	4.53361	3.59511	0.0999967				GO:0005737	AT1G72470.1	exocyst subunit exo70 family protein D1
contig33896	13.0267	12.2429	15.6036	10.9158	0.152435				GO:0003676	AT3G13224.2	RNA-binding (RRM/RBD/RNP motifs) family protein
contig24122	19.237	15.2844	19.9457	13.8476	0.174147				GO:0016787	AT5G64300.1	GTP cyclohydrolase II
contig131050	0.300006	0.241946	0.252915	0.214159	0.141794				GO:0005739	AT5G07900.1	Mitochondrial transcription termination factor family protein
contig124579	3.02439	2.7384	3.02882	2.88413	0.0472228
contig49454	1.5426	1.13004	1.87016	1.47804	0.201538				GO:0003676	AT5G50990.1	Tetratricopeptide repeat (TPR)-like superfamily protein
contig11814	65.8467	63.907	76.699	59.3185	0.110848				GO:0005215	AT4G01100.2	adenine nucleotide transporter 1
contig63559	4.63802	5.49173	5.25072	4.50057	0.0959001				GO:0006464	AT3G57870.1	sumo conjugation enzyme 1
contig32465	0.78422	0.659297	0.714559	0.626965	0.0989512					AT5G02700.1	F-box/RNI-like superfamily protein
contig47483	1.02111	0.807244	0.961059	0.700346	0.167183				GO:0006259	ATMG00860.1	DNA/RNA polymerases superfamily protein
contig91420	0.391821	0.284552	0.298099	0.281517	0.16682
contig25467	8.97261	9.8154	9.83414	7.58159	0.116978				GO:0005840	AT1G17080.1	Ribosomal protein L18ae family
contig20069	24.4159	19.3262	21.794	20.1113	0.105166				GO:0005737	AT5G20680.1	TRICHOME BIREFRINGENCE-LIKE 16
contig5779	7.27267	6.57452	5.49959	5.56186	0.137072
contig68261	5.05548	4.06219	3.85995	4.7572	0.127486
contig26213	2.24996	1.7487	2.18281	1.66324	0.151955				GO:0003824	AT4G15475.1	F-box/RNI-like superfamily protein
contig66246	3.32182	2.86242	3.36446	3.49201	0.084306				GO:0005488	AT4G19190.1	zinc knuckle (CCHC-type) family protein
contig43842	1.93402	1.49242	1.70361	1.32395	0.163723
contig39196	10.4397	9.83021	9.35904	6.87154	0.171632					AT1G78070.1	Transducin/WD40 repeat-like superfamily protein
contig52458	1.71138	1.77994	1.78738	1.58829	0.0537166
contig29234	9.3612	7.43928	9.48724	8.80357	0.106847				GO:0005488	AT5G65950.1	FUNCTIONS IN: molecular_function unknown; INVOLVED IN: biological_process unknown; LOCATED IN: cellular_component unknown; EXPRESSED IN: 25 plant structures; EXPRESSED DURING: 15 growth stages; CONTAINS InterPro DOMAIN/s: Protein of unknown function DUF1683 C-terminal (InterPro:IPR012880) Foie gras liver health family 1 (InterPro:IPR021773); Has 30201 Blast hits to 17322 proteins in 780 species: …
contig49158	4.93559	3.28216	3.396	4.8928	0.2207
contig21195	4.88079	4.0494	4.84703	3.84205	0.121914				GO:0004518	AT4G30100.1	P-loop containing nucleoside triphosphate hydrolases superfamily protein
contig38370	0.504159	0.534401	0.545922	0.548068	0.0379445				GO:0005488	AT3G23330.1	Tetratricopeptide repeat (TPR)-like superfamily protein
contig45729	2.36186	2.36408	2.80657	2.20266	0.106729				GO:0005737	AT5G61070.1	histone deacetylase of the RPD3/HDA1 superfamily 18
contig18636	0.314882	0.299925	0.249987	0.393613	0.18924
contig1810	6.70066	4.55864	6.52529	5.49167	0.17104				GO:0003723	AT5G53060.1	RNA-binding KH domain-containing protein
contig110737	0.541866	0.492592	0.378271	0.463501	0.146303				GO:0016787	AT3G52570.1	alpha/beta-Hydrolases superfamily protein
contig31211	12.1987	9.44931	11.0988	8.42253	0.163462				GO:0000166	AT3G03940.1	Protein kinase family protein
contig31786	1.85304	1.27293	1.2221	1.73573	0.210408
contig26362	25.827	19.7312	25.8232	16.9292	0.202731
contig59411	16.7631	15.9809	11.6356	11.1965	0.207619
contig26964	21.8471	21.2705	22.0804	14.2999	0.187776
contig89433	0.734476	0.504807	0.536374	0.493495	0.199063
contig33305	0.413378	0.373577	0.341311	0.416526	0.0925508					AT4G10200.1	TTF-type zinc finger protein with HAT dimerisation domain
contig20416	9.75811	8.05331	8.48026	7.72448	0.104828					AT2G13770.1	CONTAINS InterPro DOMAIN/s: Putative harbinger transposase-derived nuclease (InterPro:IPR006912); Has 451 Blast hits to 352 proteins in 33 species: Archae - 0; Bacteria - 0; Metazoa - 28; Fungi - 8; Plants - 388; Viruses - 0; Other Eukaryotes - 27 (source: NCBI BLink).
contig1420	11.2528	9.82365	9.33074	7.55834	0.160656
contig9893	5.10631	3.57494	3.48022	3.31588	0.214911
contig29394	24.9181	21.9523	25.0644	22.5587	0.0677246				GO:0005737	AT5G47010.1	RNA helicase putative
contig64249	1.22683	1.20925	1.00554	1.46283	0.152562
contig36560	14.9275	11.6806	18.3268	13.6244	0.191034
contig71608	1.30829	1.16365	0.913861	0.992115	0.161388
contig27816	21.7771	16.3589	18.2014	22.981	0.155219
contig84062	1.17225	1.0513	1.30451	1.20382	0.0881992
contig107078	0.469691	0.815855	0.773998	0.744343	0.223908
contig44921	16.2265	14.0106	15.2694	15.8035	0.0627183				GO:0000166	AT4G12020.2	protein kinase family protein
contig56336	2.34248	2.00532	1.58048	1.4736	0.216381
contig36504	2.22262	2.36336	2.84463	1.76764	0.192855
contig81641	2.08163	1.47325	1.45456	1.62463	0.176165
contig64428	2.02835	1.6644	1.43125	1.52608	0.157594				GO:0005737
contig13068	2.80308	2.00986	2.89845	1.83076	0.227851				GO:0016740	AT5G44740.2	Y-family DNA polymerase H
contig133	45.8583	32.7011	37.6306	30.2418	0.188204
contig60226	1.50611	1.60085	1.59605	1.45427	0.046455
contig40901	9.01471	6.52467	7.43869	6.53239	0.158955
contig35515	24.0067	24.2042	30.0042	21.1665	0.149269				GO:0008152	AT5G46410.2	SCP1-like small phosphatase 4
contig74524	9.70924	10.3426	10.3899	7.5146	0.142522				GO:0005634	AT5G25150.1	TBP-associated factor 5
contig69658	3.66502	3.13668	2.83324	2.57273	0.153748
contig53804	4.71287	3.27494	3.32662	4.71894	0.203899
contig5443	5.61655	4.23382	4.16415	4.35302	0.149731					AT5G62760.1	P-loop containing nucleoside triphosphate hydrolases superfamily protein
contig52135	3.57598	3.18836	2.44967	3.41453	0.157648
contig21428	9.43151	12.2667	10.6108	7.86953	0.185051				GO:0005886	AT2G39210.1	Major facilitator superfamily protein
contig24928	5.31398	4.39234	4.78964	6.35317	0.162903				GO:0016020	AT4G38360.2	Protein of unknown function (DUF300)
contig16461	11.0236	7.14034	10.7571	9.46344	0.184796				GO:0000003	AT1G74960.2	fatty acid biosynthesis 1
contig123356	0.481815	0.484771	0.510946	0.551659	0.0637539
contig20489	7.87539	7.10279	8.66354	6.08482	0.14815				GO:0005739	AT2G25570.1	binding
contig9964	8.61936	7.75143	10.2802	7.73854	0.139021				GO:0007165	AT5G60410.2	DNA-binding protein with MIZ/SP-RING zinc finger PHD-finger and SAP domain
contig70990	3.73114	3.48901	3.33639	2.5477	0.156301
contig46019	3.81114	2.60519	2.7308	2.90224	0.181345
contig31343	1.55277	1.25799	1.23213	1.02877	0.170202					AT4G18465.1	RNA helicase family protein
contig64310	4.07951	4.48517	4.34604	3.33115	0.126714
contig47828	9.14355	5.58293	6.68019	7.75153	0.208569				GO:0009536	AT2G41460.1	apurinic endonuclease-redox protein
contig60119	2.01635	1.50248	1.61852	1.7984	0.129305
contig59777	1.31211	1.50879	1.34605	1.03808	0.150105
contig63006	0.571979	0.415337	0.668561	0.570171	0.188207
contig69705	2.64444	1.85146	1.91265	2.34844	0.17155				GO:0009058	AT2G03220.1	fucosyltransferase 1
contig3051	3.5369	3.12215	3.8632	2.59834	0.166581					AT5G41220.1	glutathione S-transferase THETA 3
contig47699	12.062	14.2976	12.0012	9.45302	0.165643				GO:0030246	AT3G17940.1	Galactose mutarotase-like superfamily protein
contig27001	11.8222	10.1747	12.1876	9.21924	0.128689				GO:0005829	AT4G34660.1	SH3 domain-containing protein
contig60799	2.74608	3.35612	3.4332	2.51309	0.150371
contig6826	20.7754	16.9493	26.6255	22.3692	0.184754				GO:0005618	AT4G36195.1	Serine carboxypeptidase S28 family protein
contig29597	7.15598	8.41993	8.27405	7.72355	0.0729519					AT4G00755.1	F-box family protein
contig41275	21.2105	19.7603	20.2997	26.0949	0.132692				GO:0005623	AT4G28370.1	RING/U-box superfamily protein
contig19825	5.92481	5.76325	6.10641	5.27567	0.0618313				GO:0016787	AT2G46620.1	P-loop containing nucleoside triphosphate hydrolases superfamily protein
contig9080	5.36342	5.38389	6.78176	4.49945	0.171495				GO:0005488	AT1G27750.1	nucleic acid binding
contig13903	45.3364	44.7013	46.802	31.6951	0.166481				GO:0016740	AT4G29010.1	Enoyl-CoA hydratase/isomerase family
contig30885	4.53486	3.55505	4.77549	4.45254	0.123378					AT4G38280.1	BEST Arabidopsis thaliana protein match is: Integral membrane protein hemolysin-III homolog (TAIR:AT2G45250.1); Has 65 Blast hits to 65 proteins in 13 species: Archae - 0; Bacteria - 0; Metazoa - 0; Fungi - 2; Plants - 63; Viruses - 0; Other Eukaryotes - 0 (source: NCBI BLink).
contig14459	35.3909	26.2633	28.3314	25.0321	0.160984
contig62477	37.6833	32.7869	27.7889	29.3034	0.137729
contig114547	1.67896	1.37809	1.92087	1.50047	0.145592				GO:0007049	AT5G66130.1	RADIATION SENSITIVE 17
contig122829	0.378992	0.5104	0.507708	0.544262	0.150047
contig91788	1.61023	1.46677	1.81052	1.23123	0.159412					AT5G07900.1	Mitochondrial transcription termination factor family protein
contig4049	42.1407	42.8299	49.4467	32.0653	0.172303				GO:0006810	AT3G47810.2	Calcineurin-like metallo-phosphoesterase superfamily protein
contig47134	4.4356	3.04603	3.53956	2.58097	0.233291					AT5G35330.1	methyl-CPG-binding domain protein 02
contig68378	2.67589	2.67143	2.60016	2.36869	0.0560143
contig7500	4.53352	4.92877	4.86524	4.48796	0.047893
contig30957	1.29892	1.06694	1.21638	1.01143	0.115382
contig1572	9.52503	6.52805	8.0163	10.7808	0.211582					AT5G58510.1	unknown protein; FUNCTIONS IN: molecular_function unknown; INVOLVED IN: biological_process unknown; LOCATED IN: chloroplast; EXPRESSED IN: 23 plant structures; EXPRESSED DURING: 14 growth stages; BEST Arabidopsis thaliana protein match is: unknown protein (TAIR:AT5G55060.2); Has 30201 Blast hits to 17322 proteins in 780 species: Archae - 12; Bacteria - 1396; Metazoa - 17338; Fungi - 3422; Plants …
contig104052	0.383101	0.280338	0.307187	0.3582	0.141
contig7400	8.95596	7.48783	7.24049	6.79351	0.122869
contig38592	12.382	8.47302	10.5304	12.2972	0.168628				GO:0019538	AT1G17110.2	ubiquitin-specific protease 15
contig44539	61.3539	37.564	58.6304	52.2546	0.202701				GO:0000166	AT2G25760.2	Protein kinase family protein
contig51573	4.93023	3.18656	3.30594	4.24791	0.210647
contig3594	7.11316	5.76871	7.72001	6.65006	0.120735				GO:0005739	AT3G18800.1	unknown protein; FUNCTIONS IN: molecular_function unknown; INVOLVED IN: biological_process unknown; LOCATED IN: plasma membrane; EXPRESSED IN: 17 plant structures; EXPRESSED DURING: 12 growth stages; Has 58 Blast hits to 58 proteins in 12 species: Archae - 0; Bacteria - 0; Metazoa - 0; Fungi - 0; Plants - 58; Viruses - 0; Other Eukaryotes - 0 (source: NCBI BLink).
contig36967	1.63841	1.24959	1.48201	1.40833	0.111839
contig27433	1.69391	1.38306	1.66697	1.62321	0.089314
contig7063	15.8605	12.3495	14.48	12.1061	0.130858
contig945	16.9549	14.0979	19.3038	16.3487	0.128316				GO:0005488	AT2G14260.1	proline iminopeptidase
contig44773	8.60074	8.18706	12.0877	7.9603	0.210382				GO:0005783	AT1G65020.1	FUNCTIONS IN: molecular_function unknown; INVOLVED IN: biological_process unknown; LOCATED IN: endoplasmic reticulum plasma membrane; EXPRESSED IN: 23 plant structures; EXPRESSED DURING: 13 growth stages; CONTAINS InterPro DOMAIN/s: NERD (InterPro:IPR011528); Has 69 Blast hits to 69 proteins in 27 species: Archae - 0; Bacteria - 18; Metazoa - 8; Fungi - 0; Plants - 36; Viruses - 0; Other Eukaryot…
contig41771	0.475562	0.322952	0.363878	0.346582	0.179349				GO:0005737	AT3G42170.1	BED zinc finger ;hAT family dimerisation domain
contig1791	7.896	7.81261	8.94775	6.94858	0.103612				GO:0005739	AT3G46620.1	zinc finger (C3HC4-type RING finger) family protein
contig11726	4.12317	2.8346	3.36979	3.32663	0.155771				GO:0003824	AT2G36230.1	Aldolase-type TIM barrel family protein
contig12851	14.883	14.0597	18.6637	13.1477	0.159513					AT3G58050.1	unknown protein; BEST Arabidopsis thaliana protein match is: unknown protein (TAIR:AT2G41960.1); Has 13384 Blast hits to 8116 proteins in 546 species: Archae - 41; Bacteria - 766; Metazoa - 5596; Fungi - 1431; Plants - 589; Viruses - 46; Other Eukaryotes - 4915 (source: NCBI BLink).
contig20923	91.2056	74.7166	91.4393	76.2891	0.109773
contig10465	4.38767	5.02141	5.3627	3.59622	0.169231
contig38129	7.07178	6.47387	7.6363	5.04259	0.170082				GO:0005622	AT3G13224.2	RNA-binding (RRM/RBD/RNP motifs) family protein
contig33303	13.6573	8.09705	9.80572	9.92098	0.226097				GO:0005488	AT4G38120.1	ARM repeat superfamily protein
contig113498	0.717875	0.572714	0.68246	0.537053	0.137608
contig27341	38.6211	27.6509	25.8954	31.6446	0.182529
contig48833	1.24519	0.771644	0.905535	1.04855	0.204244
contig25698	5.11599	3.87325	3.67449	4.13549	0.152222				GO:0005886	AT5G03040.1	IQ-domain 2
contig27170	23.7659	21.6217	24.2584	24.2886	0.0538338				GO:0016020	AT2G14255.1	Ankyrin repeat family protein with DHHC zinc finger domain
contig6845	1.62209	1.08007	1.3477	1.45706	0.165372
contig85567	2.47593	1.98364	2.13792	2.10235	0.0971104
contig40116	15.4651	10.7107	10.9121	10.1504	0.208156				GO:0003824	AT5G49970.1	pyridoxin (pyrodoxamine) 5'-phosphate oxidase
contig21530	17.1488	15.3565	17.6595	13.0283	0.132554					AT1G15780.1	unknown protein; BEST Arabidopsis thaliana protein match is: unknown protein (TAIR:AT2G10440.1); Has 103701 Blast hits to 43153 proteins in 1828 species: Archae - 30; Bacteria - 7385; Metazoa - 38639; Fungi - 11531; Plants - 7727; Viruses - 307; Other Eukaryotes - 38082 (source: NCBI BLink).
contig16887	4.89671	3.70522	4.46953	3.7819	0.135441				GO:0006464	AT1G60220.1	UB-like protease 1D
contig46654	6.08503	4.44426	5.23641	4.9594	0.132421				GO:0016787	AT3G21180.1	autoinhibited Ca(2+)-ATPase 9
contig58151	3.15934	2.60739	3.47133	2.89986	0.121375					AT3G24490.1	Alcohol dehydrogenase transcription factor Myb/SANT-like family protein
contig4580	1.01957	0.757324	0.924178	0.768844	0.146132
contig7263	43.766	29.726	41.4967	32.405	0.185344				GO:0006950	AT4G15802.1	heat shock factor binding protein
contig22818	17.4365	14.6138	18.6987	13.8362	0.142423					AT5G49950.1	alpha/beta-Hydrolases superfamily protein
contig27879	11.0584	10.2085	14.0364	10.2657	0.158435				GO:0006950	AT2G26890.1	DNAJ heat shock N-terminal domain-containing protein
contig35691	2.04322	1.56183	1.26444	1.59384	0.198792				GO:0009058	AT1G10095.1	Protein prenylyltransferase superfamily protein
contig99706	2.53603	2.87565	3.73859	2.72786	0.178891
contig26542	14.0437	12.6241	16.2345	12.282	0.130157				GO:0005623	AT1G51350.1	ARM repeat superfamily protein
contig51376	0.819941	0.608067	0.824911	0.622183	0.16673
contig35613	1.63117	1.17798	1.2702	1.47362	0.146712				GO:0008152	AT5G47810.1	phosphofructokinase 2
contig18423	10.3095	10.5662	12.138	7.3378	0.19862				GO:0009536	AT2G43630.1	FUNCTIONS IN: molecular_function unknown; INVOLVED IN: biological_process unknown; LOCATED IN: chloroplast thylakoid membrane chloroplast nucleus chloroplast envelope; EXPRESSED IN: 22 plant structures; EXPRESSED DURING: 13 growth stages; BEST Arabidopsis thaliana protein match is: glycine-rich protein (TAIR:AT3G59640.2); Has 67 Blast hits to 67 proteins in 20 species: Archae - 0; Bacteria - 4; M…
contig18804	1.45813	0.932931	1.13301	1.31571	0.188127					AT1G70620.3	cyclin-related
contig4638	14.9774	12.7029	14.7385	14.9367	0.0764098					AT1G23330.1	alpha/beta-Hydrolases superfamily protein
contig27021	2.66189	2.34569	2.55676	2.24274	0.0781434
contig49359	4.67917	3.64664	3.74671	3.23625	0.159233				GO:0005737	AT4G20310.2	Peptidase M50 family protein
contig64554	4.06151	3.67239	3.10161	2.85944	0.159156
contig26662	4.9621	2.90832	3.80333	3.76676	0.218401
contig60239	0.531991	0.568595	0.507177	0.599015	0.0732171
contig101065	1.34044	1.12833	1.08611	1.441	0.135813
contig34107	3.56911	3.51616	3.83062	4.03696	0.0647369				GO:0003824	AT3G54690.1	Sugar isomerase (SIS) family protein
contig167507	0.613218	0.49271	0.692386	0.454216	0.194627					AT3G01490.1	Protein kinase superfamily protein
contig10622	21.746	15.5534	19.3236	18.5459	0.135869
contig29043	14.3712	10.8873	10.5342	8.85508	0.207483
contig35326	0.650838	0.793914	0.72379	0.497517	0.190406
contig65219	1.8482	1.90083	1.5671	1.4835	0.120956
contig3696	3.39573	3.72817	2.55189	3.00694	0.159903
contig91234	2.8201	2.01673	2.99814	2.55622	0.164681				GO:0005739	AT3G19970.1	alpha/beta-Hydrolases superfamily protein
contig50683	9.76622	7.03326	7.16986	8.26126	0.156953
contig28648	20.9999	16.3718	20.3438	19.2339	0.106287					AT3G30380.1	alpha/beta-Hydrolases superfamily protein
contig30337	2.95155	2.21733	2.85002	2.09794	0.171517
contig3630	17.1358	10.5026	11.7803	15.1655	0.223275				GO:0030528	AT1G79000.2	histone acetyltransferase of the CBP family 1
contig47650	2.72149	2.75541	2.622	1.72723	0.199259
contig2515	8.97194	7.38514	6.26503	6.71977	0.161405
contig49269	8.51268	6.36246	6.87862	7.01151	0.128533				GO:0005737	AT5G14420.1	RING domain ligase2
contig93152	0.26823	0.412613	0.357292	0.380292	0.174543
contig158065	1.37402	1.01722	1.26134	1.29408	0.124336					AT4G24970.1	Histidine kinase- DNA gyrase B- and HSP90-like ATPase family protein
contig81116	7.00861	4.55567	5.20493	6.9625	0.209707
contig9647	9.32449	8.97481	11.9575	9.94642	0.132639					AT4G16144.1	associated molecule with the SH3 domain of STAM 3
contig95628	0.315541	0.236097	0.226382	0.267879	0.15361					AT1G49300.1	RAB GTPase homolog G3E
contig44753	2.5451	2.27805	2.71659	1.94487	0.141971				GO:0005739	AT5G52880.1	F-box family protein
contig13967	16.4508	11.9856	11.506	12.4224	0.173459					AT5G15050.1	Core-2/I-branching beta-1 6-N-acetylglucosaminyltransferase family protein
contig55926	8.59776	6.25502	6.02859	7.5897	0.169055				GO:0006259	AT3G09100.2	mRNA capping enzyme family protein
contig29128	4.70976	4.07733	5.76742	3.89763	0.18312
contig23964	1.94006	1.58839	1.98362	1.17812	0.223675				GO:0016301	AT5G63610.1	cyclin-dependent kinase E;1
contig22506	8.90961	8.84008	10.7272	7.43531	0.150309				GO:0005634	AT5G59710.1	VIRE2 interacting protein 2
contig77438	3.82757	3.87918	3.75657	2.99949	0.114465
contig49383	10.056	9.46275	10.7751	8.39811	0.103911					AT3G24315.1	Sec20 family protein
contig42062	10.5641	8.27724	8.58855	6.28629	0.207738
contig26519	5.06089	4.65409	7.16988	5.42426	0.198548				GO:0005739	AT1G61030.1	WAPL (Wings apart-like protein regulation of heterochromatin) protein
contig70580	2.49894	2.58755	3.12976	2.32941	0.131199				GO:0006950	AT3G07525.2	autophagocytosis-associated family protein
contig40092	3.99993	2.64727	2.93387	2.81323	0.197601				GO:0009628	AT1G16590.1	DNA-binding HORMA family protein
contig85394	1.58093	0.938457	1.08444	1.23968	0.227654
contig71045	6.61746	5.42297	4.99655	6.11961	0.124467
contig56545	5.29744	3.93451	3.50866	4.26283	0.179488
contig46632	3.64749	2.77287	3.10649	2.81776	0.130378
contig7373	19.4539	12.4134	14.6456	14.9442	0.192071				GO:0016301	AT2G17930.1	Phosphatidylinositol 3- and 4-kinase family protein with FAT domain
contig54168	4.49553	6.24423	6.14184	5.25074	0.148762				GO:0016740	AT5G14860.1	UDP-Glycosyltransferase superfamily protein
contig51711	3.29512	2.19426	2.39016	2.40305	0.191523					AT5G38690.1	Zinc-finger domain of monoamine-oxidase A repressor R1 protein
contig40559	4.12464	2.75185	3.04754	2.60036	0.219699				GO:0008152	AT5G24750.1	UDP-Glycosyltransferase superfamily protein
contig26836	10.7355	7.77887	14.1148	12.4031	0.239718				GO:0030154	AT2G22540.1	K-box region and MADS-box transcription factor family protein
contig56916	8.00041	9.04471	9.22838	5.96032	0.186098				GO:0008150	AT1G62610.4	NAD(P)-binding Rossmann-fold superfamily protein
contig16270	9.62214	5.89837	9.21349	8.09389	0.203382				GO:0003676	AT3G12640.1	RNA binding (RRM/RBD/RNP motifs) family protein
contig8979	14.8559	10.3563	13.4292	11.2655	0.163806				GO:0019538	AT1G09730.1	Cysteine proteinases superfamily protein
contig14716	5.64186	5.34303	4.13713	4.32196	0.152872
contig58946	6.28449	4.72487	3.86828	5.73448	0.208173
contig63178	14.8215	11.7507	10.5739	15.6283	0.183179					AT5G09400.1	K+ uptake permease 7
contig16614	4.45935	5.19463	5.88252	3.77601	0.188658				GO:0003824
contig19481	2.95367	2.78146	3.28491	1.87599	0.22126				GO:0016787
contig78601	0.324506	0.295181	0.246384	0.249176	0.135563				GO:0016020	AT3G12100.1	Cation efflux family protein
contig49809	8.64139	6.56472	6.90685	5.92921	0.165499
contig32605	3.96176	2.72931	2.63337	3.50377	0.198434
contig13949	87.5201	73.4891	82.3415	77.319	0.0760471				GO:0006810	AT3G47810.2	Calcineurin-like metallo-phosphoesterase superfamily protein
contig148387	0.363454	0.446745	0.523141	0.577172	0.194798					AT3G22960.1	Pyruvate kinase family protein
contig37622	8.51504	5.61824	7.3424	8.14439	0.17391
contig114585	1.88203	1.78345	1.71069	1.90936	0.0502297
contig71237	0.433026	0.417644	0.479202	0.597668	0.169129
contig59247	10.0683	7.11498	7.34803	7.20357	0.179776				GO:0016020	AT3G59090.2	CONTAINS InterPro DOMAIN/s: Protein of unknown function DUF1084 (InterPro:IPR009457); BEST Arabidopsis thaliana protein match is: tobamovirus multiplication 1 (TAIR:AT4G21790.1); Has 198 Blast hits to 197 proteins in 29 species: Archae - 0; Bacteria - 0; Metazoa - 0; Fungi - 2; Plants - 190; Viruses - 0; Other Eukaryotes - 6 (source: NCBI BLink).
contig14125	4.20831	4.31865	5.07198	4.38686	0.0868853				GO:0016787	AT1G10430.1	protein phosphatase 2A-2
contig8738	8.8788	6.42228	7.7206	7.48586	0.132139				GO:0009987	AT2G30600.5	BTB/POZ domain-containing protein
contig14392	3.41317	2.65723	4.32849	3.5166	0.196554				GO:0009536	AT5G55060.1	unknown protein; FUNCTIONS IN: molecular_function unknown; INVOLVED IN: biological_process unknown; LOCATED IN: cellular_component unknown; EXPRESSED IN: 25 plant structures; EXPRESSED DURING: 15 growth stages; BEST Arabidopsis thaliana protein match is: unknown protein (TAIR:AT5G58510.1); Has 223 Blast hits to 218 proteins in 80 species: Archae - 0; Bacteria - 2; Metazoa - 117; Fungi - 6; Plants…
contig35796	11.4199	8.35584	7.46522	7.32571	0.220737
contig99631	2.83159	2.39241	2.03555	2.91776	0.16108
contig159017	1.43906	2.1978	1.6644	1.56159	0.194864
contig33198	9.04946	9.22968	10.0387	6.95413	0.14912				GO:0003676	AT1G05890.2	RING/U-box superfamily protein
contig37533	4.21802	4.23417	4.36953	3.19944	0.135199				GO:0016787	AT3G47590.1	alpha/beta-Hydrolases superfamily protein
contig113045	1.29454	0.897222	0.814077	1.05569	0.208174				GO:0005739	AT3G61380.1	Phosphatidylinositol N-acetyglucosaminlytransferase subunit P-related
contig23768	6.15159	6.83513	8.27211	6.41049	0.136775				GO:0016020	AT5G20350.1	Ankyrin repeat family protein with DHHC zinc finger domain
contig37969	3.85714	2.76081	3.27017	2.74084	0.166915				GO:0009536	AT1G20670.1	DNA-binding bromodomain-containing protein
contig21625	43.3107	46.4285	50.3437	31.2449	0.192454				GO:0005488	AT1G64850.1	Calcium-binding EF hand family protein
contig95269	1.23518	1.04221	1.14503	0.897547	0.134209
contig98129	1.27462	0.82846	0.905561	0.964832	0.196943				GO:0005886	AT5G57690.1	diacylglycerol kinase 4
contig24401	11.0479	10.9953	12.9681	8.23587	0.180097				GO:0008150	AT5G03730.2	Protein kinase superfamily protein
contig61503	0.750748	0.600805	0.775086	0.55599	0.161853
contig76230	7.7388	5.34143	5.99881	8.91504	0.232844
contig79410	4.61177	3.88518	3.2749	2.66365	0.231123
contig61022	1.75433	1.1446	1.28355	1.29958	0.193482
contig110193	2.10169	1.89126	1.5786	1.76461	0.119863
contig12303	17.0889	12.2912	19.6379	18.62	0.192331				GO:0005829	AT1G32440.1	plastidial pyruvate kinase 3
contig9604	17.4807	16.1167	18.3473	11.6687	0.186668					AT2G02160.1	CCCH-type zinc finger family protein
contig21893	40.3889	41.3309	46.4905	31.0391	0.161619				GO:0005829	AT2G02760.1	ubiquiting-conjugating enzyme 2
contig81067	0.728978	0.447623	0.588658	0.602598	0.194406
contig138511	2.89566	3.44437	3.01083	2.07844	0.199653
contig110002	2.96587	2.59297	2.2881	3.39833	0.170578
contig87921	4.72461	3.46569	3.27886	3.87683	0.167498
contig67410	0.502523	0.495756	0.510856	0.373929	0.13776				GO:0006464	AT1G34110.1	Leucine-rich receptor-like protein kinase family protein
contig91607	0.763956	0.6418	0.95751	0.784996	0.165157
contig9079	8.47549	6.59554	7.31795	7.8495	0.105569				GO:0003676	AT1G27750.1	nucleic acid binding
contig47591	6.21344	8.42445	7.94606	5.60917	0.191542
contig3744	20.0618	14.1809	13.6714	15.4327	0.183897				GO:0005739	AT3G57810.2	Cysteine proteinases superfamily protein
contig23408	8.46629	5.10211	6.16287	7.3619	0.215272					AT1G24460.1	unknown protein; FUNCTIONS IN: molecular_function unknown; INVOLVED IN: biological_process unknown; LOCATED IN: cellular_component unknown; EXPRESSED IN: 23 plant structures; EXPRESSED DURING: 14 growth stages; BEST Arabidopsis thaliana protein match is: unknown protein (TAIR:AT4G31570.1); Has 181008 Blast hits to 85359 proteins in 3551 species: Archae - 3290; Bacteria - 48304; Metazoa - 70793; F…
contig50522	25.0007	14.8151	19.2891	19.6868	0.21162
contig15508	15.4936	13.9367	16.9144	13.4706	0.104812				GO:0005975	AT1G65930.1	cytosolic NADP+-dependent isocitrate dehydrogenase
contig113099	6.79039	5.15587	6.02254	4.45842	0.181181
contig118412	4.97081	4.29598	4.58965	4.94609	0.0683089
contig90419	0.805893	0.658452	0.792256	0.578776	0.154181				GO:0006139	AT5G52630.1	mitochondrial RNAediting factor 1
contig14759	10.8191	7.30847	10.9593	11.0503	0.181348					AT4G31080.2	Protein of unknown function (DUF2296)
contig16944	14.4789	20.2431	21.1416	14.2265	0.210014				GO:0016020	AT4G28770.2	Tetraspanin family protein
contig62372	2.2542	2.70703	2.80659	1.63985	0.226245
contig19406	8.96598	6.14383	5.38851	8.05362	0.232026
contig24619	10.5675	8.77794	7.84251	6.98714	0.179619
contig559	6.50741	5.04205	4.79832	4.54361	0.168533
contig65399	18.3594	13.6169	17.1146	14.2358	0.143516				GO:0003723	AT3G04610.1	RNA-binding KH domain-containing protein
contig82361	1.32717	0.929452	0.929656	1.01426	0.179937
contig37458	2.88466	2.39237	3.17889	2.04128	0.192933
contig42912	48.118	40.4698	42.3165	37.228	0.10871				GO:0006464	AT4G32660.1	Protein kinase superfamily protein
contig25110	23.7789	15.2088	18.3793	20.5953	0.185413				GO:0006464	AT2G43850.1	Integrin-linked protein kinase family
contig36620	2.68215	1.61764	1.80412	2.10486	0.226818
contig2588	17.4859	21.2024	23.5949	16.1689	0.173574				GO:0005488	AT5G06260.1	TLD-domain containing nucleolar protein
contig72472	0.744173	0.669818	0.645357	0.598735	0.0914022
contig17974	3.59402	2.86924	3.41433	2.4025	0.176318				GO:0006950	AT1G21710.1	8-oxoguanine-DNA glycosylase 1
contig44466	6.16158	5.08952	5.09522	4.65177	0.122399
contig8918	25.0274	33.279	33.5425	21.0631	0.219655				GO:0005829	AT3G26420.1	RNA-binding (RRM/RBD/RNP motifs) family protein with retrovirus zinc finger-like domain
contig20259	4.8435	3.79326	5.16236	3.4595	0.189305
contig39406	8.41687	7.87799	5.75896	5.99151	0.1902
contig6151	7.89473	7.17764	6.97319	6.87349	0.063769				GO:0003723	AT5G42820.2	Zinc finger C-x8-C-x5-C-x3-H type family protein
contig12856	31.1254	42.3607	35.4365	25.6283	0.210064				GO:0009536	AT5G16150.1	plastidic GLC translocator
contig57900	1.21101	0.988689	0.994601	1.01847	0.100643				GO:0016787	AT5G08110.1	nucleic acid binding;ATP-dependent helicases;ATP binding;helicases;ATP-dependent helicases
contig59440	20.2005	13.189	15.1034	14.2693	0.198023
contig39970	7.97885	7.64109	8.45109	6.59216	0.102937					AT3G11850.1	Protein of unknown function DUF593
contig2639	8.84156	8.99593	9.72258	7.4211	0.110088				GO:0016787	AT1G76900.1	tubby like protein 1
contig70861	3.33745	2.42627	2.66185	2.76047	0.138359
contig99148	6.02132	5.64008	5.25375	4.6415	0.109249				GO:0005739	AT1G78230.1	Outer arm dynein light chain 1 protein
contig27346	3.10412	3.38454	3.69151	2.51996	0.156931				GO:0016020	AT2G04620.1	Cation efflux family protein
contig56416	0.756144	0.636232	0.695448	0.591546	0.106835					AT3G11910.1	ubiquitin-specific protease 13
contig13523	6.50782	7.05639	6.0688	5.79993	0.0863958				GO:0016301	AT5G16760.1	Inositol 1 3 4-trisphosphate 5/6-kinase family protein
contig51384	2.52445	2.18812	2.87401	2.14832	0.13911					AT5G48340.1	unknown protein; Has 1807 Blast hits to 1807 proteins in 277 species: Archae - 0; Bacteria - 0; Metazoa - 736; Fungi - 347; Plants - 385; Viruses - 0; Other Eukaryotes - 339 (source: NCBI BLink).
contig30783	3.29989	3.66683	2.53165	3.00483	0.153502
contig33915	4.70169	3.45999	4.34874	3.42126	0.161376				GO:0009790	AT3G20420.1	RNAse THREE-like protein 2
contig49305	6.11234	4.8219	5.56665	4.62307	0.13011
contig27838	11.0598	8.64817	10.3564	9.04644	0.114942				GO:0006950	AT5G46550.1	DNA-binding bromodomain-containing protein
contig62121	2.31368	2.18766	2.43334	2.36704	0.044755				GO:0005829	AT2G26350.1	peroxin 10
contig3248	17.0101	20.279	19.1604	16.2805	0.102123				GO:0005515	AT5G06580.1	FAD-linked oxidases family protein
contig59778	4.28188	4.32423	3.44001	3.35187	0.136444				GO:0009628	AT3G03910.1	glutamate dehydrogenase 3
contig13200	7.80467	7.00702	7.86116	6.089	0.115633				GO:0007165	AT3G57520.1	seed imbibition 2
contig7442	31.5916	26.8313	33.0648	21.8645	0.1789				GO:0016787	AT2G41530.1	S-formylglutathione hydrolase
contig31621	29.5456	20.8803	17.9551	23.6481	0.214712				GO:0009908	AT4G32551.2	LisH dimerisation motif;WD40/YVTN repeat-like-containing domain
contig99513	0.965126	0.682127	0.832823	0.835881	0.139575
contig25217	9.23854	9.4387	10.7527	8.74872	0.0896757				GO:0006950	AT3G53570.1	FUS3-complementing gene 1
contig148227	1.22569	1.58886	1.79905	1.56303	0.153591				GO:0005488
contig24707	3.20578	2.86761	2.84647	2.57341	0.0901366				GO:0005622	AT1G27840.3	Transducin/WD40 repeat-like superfamily protein
contig20766	5.55066	5.67931	7.94024	5.53713	0.190607				GO:0016787	AT5G20660.1	Zn-dependent exopeptidases superfamily protein
contig73400	3.91083	3.89087	4.36315	3.67543	0.0729994
contig34114	1.25615	1.10251	1.17941	1.01625	0.0903618
contig45885	1.38225	1.35772	1.48256	1.17515	0.0949433
contig112125	2.4543	1.84091	2.45759	1.8769	0.159921
contig29180	24.3751	23.9855	29.6112	25.5982	0.0993562				GO:0019725	AT3G47300.1	SELT-like protein precursor
contig69805	7.90653	7.31959	8.74561	7.54611	0.0794436				GO:0005515	AT1G69390.1	homologue of bacterial MinE 1
contig7599	10.6092	9.25929	11.6592	10.4884	0.0935224				GO:0006350	AT1G70060.1	SIN3-like 4
contig34528	2.91764	2.33857	3.17936	2.81842	0.12487				GO:0003824	AT2G03667.1	Asparagine synthase family protein
contig6220	38.0349	34.5985	43.9159	27.991	0.18415				GO:0006810	AT3G07560.1	peroxin 13
contig4217	4.33302	2.98595	3.74151	3.9589	0.151227				GO:0016787	AT1G32490.1	RNA helicase family protein
contig63025	3.34501	2.56214	2.37817	2.50489	0.162529
contig9781	3.68845	2.75693	4.32977	3.81774	0.179692					AT4G29000.1	Tesmin/TSO1-like CXC domain-containing protein
contig77636	3.5725	4.21785	4.35641	4.486	0.0975235
contig22458	19.3832	17.5297	21.0064	20.9118	0.082785
contig66755	2.50859	1.68362	2.28761	2.03927	0.166151
contig42206	11.5215	10.5601	12.4147	6.98292	0.229661				GO:0005739	AT5G19150.1	pfkB-like carbohydrate kinase family protein
contig8651	2.49047	1.75415	2.02882	1.98793	0.149209				GO:0006810
contig51925	11.7367	11.8397	11.3278	10.6323	0.0481201				GO:0005739	AT3G14100.1	RNA-binding (RRM/RBD/RNP motifs) family protein
contig11561	18.3735	19.1063	20.5143	19.3902	0.045944				GO:0006139	AT4G32180.1	pantothenate kinase 2
contig39735	6.59853	7.34675	7.74393	4.94787	0.185578					AT3G07790.1	DGCR14-related
contig63826	5.70635	5.30875	5.43796	4.08046	0.140495				GO:0003676	AT3G57910.1	D111/G-patch domain-containing protein
contig6214	8.83269	6.12435	7.7663	8.40476	0.152764				GO:0005488
contig19249	55.0641	48.8622	64.5063	38.93	0.20727				GO:0009056	AT3G10850.1	Metallo-hydrolase/oxidoreductase superfamily protein
contig38214	15.21	10.7665	12.3003	12.4119	0.146065					AT5G58510.1	unknown protein; FUNCTIONS IN: molecular_function unknown; INVOLVED IN: biological_process unknown; LOCATED IN: chloroplast; EXPRESSED IN: 23 plant structures; EXPRESSED DURING: 14 growth stages; BEST Arabidopsis thaliana protein match is: unknown protein (TAIR:AT5G55060.2); Has 30201 Blast hits to 17322 proteins in 780 species: Archae - 12; Bacteria - 1396; Metazoa - 17338; Fungi - 3422; Plants …
contig25902	3.9081	2.86174	3.82984	3.40946	0.137023				GO:0016301	AT5G35410.1	Protein kinase superfamily protein
contig14121	1.7151	1.66243	1.61676	1.66355	0.0241433
contig102142	2.29408	1.58731	2.31256	2.19021	0.163834
contig45181	2.4747	3.03636	3.46452	2.63597	0.152488
contig42915	4.12432	3.67651	3.09109	4.06774	0.127323
contig32740	20.7793	21.6718	21.6333	21.0355	0.0208188
contig2520	5.82888	4.30764	4.06416	4.39148	0.171981
contig28613	11.7739	10.3972	13.4224	9.62053	0.147725
contig37566	3.87059	3.13841	2.86339	3.30308	0.129063				GO:0005515	AT2G06005.1	FRIGIDA interacting protein 1
contig166690	1.35367	1.50038	1.25288	1.03104	0.153502
contig133227	0.780094	0.714538	0.533188	0.518597	0.20538				GO:0016020	AT5G57350.1	H(+)-ATPase 3
contig161	28.5528	18.3014	23.0708	26.8231	0.187796
contig61167	12.0322	12.4743	14.3344	8.74012	0.195706
contig85073	0.838006	0.774534	0.669469	0.696442	0.102819					AT3G62390.1	TRICHOME BIREFRINGENCE-LIKE 6
contig36994	0.738121	0.56174	0.590176	0.462851	0.193567
contig41943	1.63068	2.13237	2.66941	1.65446	0.242238				GO:0005737	AT3G07040.1	NB-ARC domain-containing disease resistance protein
contig9335	12.3467	10.3588	11.8707	11.5419	0.0735096
contig42419	6.1777	4.14719	5.20383	4.37446	0.185098				GO:0016787	AT1G30300.1	Metallo-hydrolase/oxidoreductase superfamily protein
contig8887	2.2719	1.57358	2.49205	2.03579	0.187935					AT4G12760.1	unknown protein; Has 30201 Blast hits to 17322 proteins in 780 species: Archae - 12; Bacteria - 1396; Metazoa - 17338; Fungi - 3422; Plants - 5037; Viruses - 0; Other Eukaryotes - 2996 (source: NCBI BLink).
contig4187	2.08514	1.41987	1.59467	1.33848	0.207883
contig69991	11.9448	11.1441	15.8427	10.6488	0.190366
contig56992	2.45945	1.91245	2.1301	1.53397	0.193327
contig14693	2.76412	2.46307	2.94077	2.01205	0.159671				GO:0006259	ATMG00860.1	DNA/RNA polymerases superfamily protein
contig30094	12.8759	8.55529	10.711	12.2375	0.173172				GO:0016043	AT5G15540.1	PHD finger family protein
contig2336	44.6486	33.3736	33.198	40.3656	0.147881				GO:0005622	AT1G70320.1	ubiquitin-protein ligase 2
contig43307	2.45495	1.51843	1.56496	1.98936	0.232126				GO:0005488	AT4G27640.1	ARM repeat superfamily protein
contig70008	12.0518	7.37011	7.92726	8.05609	0.24339
contig36026	2.56694	3.16959	3.49087	2.45472	0.168825				GO:0005737	AT5G39590.1	TLD-domain containing nucleolar protein
contig21296	1.92059	1.75812	2.01909	1.84007	0.0592203					AT3G07870.1	F-box and associated interaction domains-containing protein
contig23352	7.50385	6.7867	9.92203	6.32076	0.209805					AT5G06830.1	unknown protein; CONTAINS InterPro DOMAIN/s: Protein of unknown function DUF773 (InterPro:IPR008491); Has 365 Blast hits to 359 proteins in 109 species: Archae - 9; Bacteria - 13; Metazoa - 209; Fungi - 7; Plants - 47; Viruses - 0; Other Eukaryotes - 80 (source: NCBI BLink).
contig47850	1.54413	1.17523	1.61118	1.10362	0.188557
contig37447	4.29965	2.86862	4.20511	2.9114	0.220572				GO:0005634	AT4G34412.1	CONTAINS InterPro DOMAIN/s: Kinase binding protein CGI-121 (InterPro:IPR013926); Has 275 Blast hits to 275 proteins in 139 species: Archae - 0; Bacteria - 5; Metazoa - 98; Fungi - 109; Plants - 42; Viruses - 0; Other Eukaryotes - 21 (source: NCBI BLink).
contig105060	0.615921	0.514045	0.367313	0.546347	0.205013
contig42479	24.1653	19.888	22.2559	19.4033	0.103125				GO:0005488
contig33600	5.64306	5.07739	4.75256	5.6282	0.0827885					AT1G45150.1	unknown protein; Has 219 Blast hits to 202 proteins in 78 species: Archae - 0; Bacteria - 166; Metazoa - 0; Fungi - 0; Plants - 36; Viruses - 0; Other Eukaryotes - 17 (source: NCBI BLink).
contig68341	7.50721	5.2733	6.14892	5.46596	0.165815				GO:0003700	AT2G01060.1	myb-like HTH transcriptional regulator family protein
contig57318	0.989158	0.887485	0.958689	0.758332	0.114255					AT2G02955.1	maternal effect embryo arrest 12
contig12629	0.897053	0.668015	0.950165	0.824469	0.146866
contig9472	4.35362	4.29839	4.55564	3.73144	0.0834293				GO:0005488	AT3G62240.1	RING/U-box superfamily protein
contig35622	0.484774	0.543357	0.595997	0.408109	0.158733
contig9400	13.246	9.64995	14.6423	12.4563	0.168276				GO:0006259	AT3G09100.2	mRNA capping enzyme family protein
contig9235	2.46313	2.24646	2.70276	1.83726	0.158933					AT2G30600.5	BTB/POZ domain-containing protein
contig88174	4.59566	3.4355	3.40845	4.20466	0.150083				GO:0009628	AT3G03910.1	glutamate dehydrogenase 3
contig11131	22.8907	21.4366	21.7426	22.5819	0.0309266				GO:0009536	AT1G09660.1	RNA-binding KH domain-containing protein
contig11415	12.597	9.41925	13.6866	12.0959	0.151715				GO:0008219	AT4G29130.1	hexokinase 1
contig75556	1.39018	1.13996	1.62309	1.62176	0.159462				GO:0006810	AT3G62080.2	SNF7 family protein
contig29961	4.64841	3.17111	4.10136	3.14256	0.195956				GO:0009987	AT3G03320.1	RNA-binding ASCH domain protein
contig41092	4.88203	4.28193	5.20884	3.24226	0.196254				GO:0016020	AT2G20790.1	clathrin adaptor complexes medium subunit family protein
contig7462	6.03724	6.66681	7.27211	5.37309	0.12891				GO:0005488	AT5G63200.1	tetratricopeptide repeat (TPR)-containing protein
contig2985	16.3694	9.952	16.0245	13.6427	0.211237				GO:0009856	AT1G71820.2	SEC6
contig926	21.5083	19.3285	21.5604	17.3847	0.100226				GO:0006810	AT1G05940.1	cationic amino acid transporter 9
contig17192	6.74187	5.53969	6.91907	4.78832	0.168817				GO:0008152	AT1G28320.1	protease-related
contig82831	2.42952	1.68372	1.62837	2.49795	0.227052
contig44577	1.49231	1.00458	1.22874	0.983966	0.201638					AT3G54110.1	plant uncoupling mitochondrial protein 1
contig160449	0.334669	0.601633	0.470338	0.444391	0.23701
contig67202	4.65487	3.15816	3.63853	3.10903	0.197085				GO:0019725	AT1G20110.1	RING/FYVE/PHD zinc finger superfamily protein
contig52124	2.59449	2.63541	2.49332	1.91636	0.138761				GO:0005737
contig22553	5.64122	8.38789	9.33079	6.96941	0.213335				GO:0004871	AT2G02710.1	PAS/LOV protein B
contig28108	5.78177	3.98672	4.45115	4.89685	0.160024
contig5806	12.2286	9.23946	8.38899	12.3833	0.193806
contig41279	6.73201	5.49601	5.0713	4.75837	0.157076
contig93984	0.968797	0.714713	0.96705	0.832135	0.140237					AT3G58600.1	Adaptin ear-binding coat-associated protein 1 NECAP-1
contig36500	5.1186	4.63311	3.95334	3.19285	0.198249
contig26726	2.34431	1.62225	2.04373	1.59838	0.188617				GO:0005737
contig45980	6.32279	5.69771	7.3073	4.2931	0.213804				GO:0005777	AT2G29590.1	Thioesterase superfamily protein
contig20036	6.7251	3.7459	5.74565	6.26594	0.233481				GO:0007275	AT1G65580.1	Endonuclease/exonuclease/phosphatase family protein
contig9049	5.17828	4.01923	4.54581	3.98398	0.126371				GO:0006464	AT4G23130.2	cysteine-rich RLK (RECEPTOR-like protein kinase) 5
contig32417	4.19826	3.90621	4.4554	2.94396	0.170435				GO:0016020	AT4G18260.1	Cytochrome b561/ferric reductase transmembrane protein family
contig70188	4.52302	2.88508	2.71867	3.63672	0.239648
contig73917	8.168	5.04275	8.02094	6.09102	0.22281					AT1G35220.1	unknown protein; FUNCTIONS IN: molecular_function unknown; INVOLVED IN: biological_process unknown; LOCATED IN: cellular_component unknown; EXPRESSED IN: 22 plant structures; EXPRESSED DURING: 13 growth stages; Has 313 Blast hits to 185 proteins in 75 species: Archae - 0; Bacteria - 0; Metazoa - 200; Fungi - 0; Plants - 67; Viruses - 0; Other Eukaryotes - 46 (source: NCBI BLink).
contig64612	2.67028	2.13804	2.82055	2.29617	0.128062
contig5138	11.5192	8.582	6.89369	10.7721	0.22315
contig19312	1.78652	1.46732	1.445	1.69738	0.10582				GO:0016049	AT2G16950.1	transportin 1
contig39308	13.137	10.22	13.9588	11.6366	0.135121				GO:0008150	AT1G74910.1	ADP-glucose pyrophosphorylase family protein
contig54197	2.66179	2.80808	2.40606	2.42148	0.0757111
contig44250	4.02927	3.11528	2.89275	4.09924	0.175289
contig4735	12.0267	7.42484	10.7553	11.2194	0.195417				GO:0016787	AT1G07110.1	fructose-2 6-bisphosphatase
contig39029	9.56344	9.36036	9.36097	7.75279	0.0935878					AT1G32700.1	PLATZ transcription factor family protein
contig62561	5.9816	5.37526	5.83465	6.64737	0.0882884
contig92894	0.411197	0.244925	0.29379	0.320167	0.219824
contig44287	22.1556	21.7701	25.4245	22.026	0.075632				GO:0016787	AT5G20060.2	alpha/beta-Hydrolases superfamily protein
contig125651	0.5221	0.389973	0.485072	0.418175	0.133341
contig9141	3.67465	2.82362	3.46258	2.17977	0.222492					AT4G12640.1	RNA recognition motif (RRM)-containing protein
contig19518	2.83029	2.0462	2.33193	2.24358	0.141194				GO:0007165	AT5G60410.2	DNA-binding protein with MIZ/SP-RING zinc finger PHD-finger and SAP domain
contig31626	3.53332	2.39815	2.68272	2.72742	0.171967
contig8877	55.4671	34.407	35.9825	40.694	0.23053
contig42952	1.5285	1.20143	1.44332	1.49125	0.104027					AT5G59950.5	RNA-binding (RRM/RBD/RNP motifs) family protein
contig24367	13.244	14.4788	17.2152	9.45975	0.236794				GO:0016787	AT4G39120.1	myo-inositol monophosphatase like 2
contig76432	12.921	10.2024	10.7267	15.9091	0.208637
contig80636	6.9054	5.43787	4.67097	4.61057	0.19756
contig5133	4.43601	3.61381	3.82489	3.12042	0.145385					AT3G54470.1	uridine 5'-monophosphate synthase / UMP synthase (PYRE-F) (UMPS)
contig131294	0.422099	0.505296	0.578441	0.337944	0.225493
contig25938	7.57213	5.02293	6.79348	8.53577	0.213044				GO:0016787	AT1G10130.1	endoplasmic reticulum-type calcium-transporting ATPase 3
contig15133	8.08787	6.2599	8.05326	7.08936	0.118589				GO:0016787	AT1G76130.1	alpha-amylase-like 2
contig35956	1.36127	1.22191	1.05365	1.45014	0.136111
contig1866	11.0705	9.01888	8.94172	9.85609	0.101822
contig43707	14.4851	12.5789	13.7785	11.5721	0.0983722				GO:0045182	AT1G17210.1	IAP-like protein 1
contig55681	11.0688	8.23939	11.3543	7.45301	0.207031					AT4G23180.1	cysteine-rich RLK (RECEPTOR-like protein kinase) 10
contig8197	8.76297	7.97586	10.0796	7.28281	0.140725				GO:0006259	AT3G09100.2	mRNA capping enzyme family protein
contig46762	21.387	17.6415	21.8441	20.7212	0.0928949				GO:0008150	AT5G49570.1	peptide-N-glycanase 1
contig1343	11.6679	8.01368	11.667	9.91392	0.168977				GO:0005829	AT2G46020.2	transcription regulatory protein SNF2 putative
contig5521	4.50686	4.54917	5.39237	4.3053	0.102637					AT2G28130.1	unknown protein; FUNCTIONS IN: molecular_function unknown; INVOLVED IN: biological_process unknown; LOCATED IN: cellular_component unknown; EXPRESSED IN: 25 plant structures; EXPRESSED DURING: 13 growth stages; Has 35333 Blast hits to 34131 proteins in 2444 species: Archae - 798; Bacteria - 22429; Metazoa - 974; Fungi - 991; Plants - 531; Viruses - 0; Other Eukaryotes - 9610 (source: NCBI BLink).
contig68963	0.768418	0.814017	0.894107	0.786852	0.0679443
contig37344	3.49528	3.1271	3.6517	2.58044	0.148111				GO:0006810	AT1G08960.1	cation exchanger 11
contig43929	5.21914	5.64167	6.18536	5.20246	0.083153
contig14341	14.9194	13.1529	11.2035	10.4983	0.160423				GO:0016787	AT4G14570.1	acylaminoacyl-peptidase-related
contig40373	5.42527	4.04659	4.42827	4.34914	0.131151
contig47653	15.2463	10.3321	12.8139	14.0773	0.160538					AT5G07980.1	dentin sialophosphoprotein-related
contig102195	0.745028	0.770655	0.72262	0.872346	0.085002					AT1G20930.1	cyclin-dependent kinase B2;2
contig16519	4.9894	4.74857	4.52509	3.87348	0.105756					AT3G58610.1	ketol-acid reductoisomerase
contig143311	0.436638	0.44115	0.546175	0.611657	0.167354
contig112721	3.10071	3.52218	2.71748	3.70248	0.135337					AT1G02170.1	metacaspase 1
contig26085	10.3876	10.7767	11.2394	9.64795	0.0640741				GO:0005737	AT4G28880.1	casein kinase I-like 3
contig81368	1.89799	2.44227	2.53737	2.32969	0.122638				GO:0005856	AT1G67400.1	ELMO/CED-12 family protein
contig30078	10.083	10.369	11.8096	8.68858	0.124987				GO:0005634	AT5G59710.1	VIRE2 interacting protein 2
contig13217	9.28188	8.32767	7.29598	7.51357	0.11125				GO:0008150	AT5G12170.2	CRT (chloroquine-resistance transporter)-like transporter 3
contig88688	1.41483	1.09201	0.949253	0.961054	0.196418
contig6805	3.97193	2.78313	2.94805	2.84983	0.178415				GO:0000166	AT5G18525.1	protein serine/threonine kinases;protein tyrosine kinases;ATP binding;protein kinases
contig277	5.62617	4.3672	5.69218	5.08489	0.118217				GO:0005488	AT2G16485.1	nucleic acid binding;zinc ion binding;DNA binding
contig14060	8.12862	5.464	7.85059	6.70046	0.172928				GO:0000166	AT1G33980.2	Smg-4/UPF3 family protein
contig7086	61.9407	46.9869	65.9473	66.1711	0.150356				GO:0009058	AT1G64400.1	AMP-dependent synthetase and ligase family protein
contig8161	23.7784	26.8342	30.0783	20.3925	0.164084				GO:0005737	AT3G20500.1	purple acid phosphatase 18
contig110386	0.351389	0.213558	0.274295	0.263188	0.206836
contig146125	6.31218	5.82839	6.82904	5.32254	0.106367
contig84734	2.88014	2.94074	2.84998	1.82478	0.203547
contig2073	5.39617	4.10206	5.91836	4.75532	0.156101				GO:0005730	AT5G67470.1	formin homolog 6
contig80770	2.17376	2.23218	2.36923	1.34307	0.229082
contig98247	0.364391	0.334708	0.383721	0.357082	0.0562533					AT3G51700.1	PIF1 helicase
contig21857	10.4581	8.2815	9.71756	5.89795	0.233864				GO:0005730	AT3G16810.1	pumilio 24
contig108413	0.82279	0.662818	0.597406	0.628784	0.147779
contig22822	27.2912	18.4914	24.4014	25.932	0.1613
contig117463	3.01387	2.01425	2.53807	1.98055	0.205253
contig52617	3.29447	3.02129	2.83389	2.46374	0.120134
contig103831	2.22306	2.3526	2.66536	1.695	0.18105
contig13325	3.6733	2.29907	2.89746	3.50168	0.202116
contig29113	5.8189	5.99062	6.70399	4.27164	0.179795				GO:0005488	AT2G42160.1	zinc finger (ubiquitin-hydrolase) domain-containing protein
contig74314	11.4366	10.4012	9.14738	10.1184	0.091657					AT1G80500.1	SNARE-like superfamily protein
contig54855	2.35314	2.09582	2.14712	2.13966	0.0526806					AT4G24630.1	DHHC-type zinc finger family protein
contig73047	6.52606	7.32374	8.60952	5.73253	0.174106				GO:0005773	AT5G13690.1	alpha-N-acetylglucosaminidase family / NAGLU family
contig83843	4.39785	3.76389	4.72583	3.08709	0.181378				GO:0005737	AT3G10410.1	SERINE CARBOXYPEPTIDASE-LIKE 49
contig76266	16.7635	17.5845	19.5002	18.8363	0.067658
contig16826	21.0319	23.3411	24.8723	19.4706	0.108134				GO:0008152	AT5G36250.1	Protein phosphatase 2C family protein
contig29120	9.63883	8.58738	10.7576	7.29032	0.163208				GO:0030528	AT1G43850.1	SEUSS transcriptional co-regulator
contig49832	1.01165	0.797089	1.14149	0.766423	0.192337
contig11081	32.4581	31.0392	32.1619	27.817	0.068823					AT3G60910.1	S-adenosyl-L-methionine-dependent methyltransferases superfamily protein
contig1937	15.853	13.3449	19.6327	13.6639	0.185353				GO:0009058	AT5G66120.2	3-dehydroquinate synthase putative
contig67091	1.47445	1.09154	1.86194	1.45706	0.213872					AT4G15802.1	heat shock factor binding protein
contig27465	3.71347	2.80115	2.93188	3.31118	0.128834
contig59035	2.36903	1.51925	1.77729	1.47332	0.230777
contig38909	12.4348	9.76979	10.8378	7.95108	0.183714					AT3G48670.1	XH/XS domain-containing protein
contig31311	28.4385	20.6815	18.3713	26.9931	0.205633
contig30953	4.35688	5.04734	5.67127	3.66321	0.185099				GO:0005622	AT3G10572.1	3-phosphoinositide-dependent protein kinase-1 putative
contig70837	1.68241	1.47062	1.6938	1.04992	0.204105				GO:0005739	AT1G21150.1	Mitochondrial transcription termination factor family protein
contig15484	17.932	14.066	20.1847	16.3055	0.150957				GO:0000166	AT3G04500.1	RNA-binding (RRM/RBD/RNP motifs) family protein
contig12594	1.18785	1.10872	1.25037	0.917167	0.129647
contig14264	4.90733	4.52058	4.89907	3.32936	0.168849
contig113399	0.45518	0.346144	0.475631	0.359356	0.160842
contig43197	6.32059	6.02934	6.1944	5.19307	0.085666				GO:0003824	AT1G12350.1	4-phospho-panto-thenoylcysteine synthetase
contig40347	2.51194	2.4715	2.78984	1.68862	0.199919
contig124046	0.311666	0.277901	0.326611	0.417958	0.179463
contig14230	2.50354	1.87477	2.21336	2.11431	0.119582
contig37906	3.59605	2.69528	4.01185	2.84424	0.189763
contig109368	0.852548	1.0346	0.805174	1.02664	0.127052				GO:0005739	AT1G21150.1	Mitochondrial transcription termination factor family protein
contig7182	34.6085	28.2497	43.635	27.3209	0.224812				GO:0016301	AT2G20470.1	AGC (cAMP-dependent cGMP-dependent and protein kinase C) kinase family protein
contig3083	22.4384	26.3249	29.4992	19.0175	0.18768
contig45583	13.7417	10.7891	9.65771	11.6271	0.150649				GO:0016020	AT3G02420.1	unknown protein; FUNCTIONS IN: molecular_function unknown; INVOLVED IN: biological_process unknown; LOCATED IN: membrane; EXPRESSED IN: 25 plant structures; EXPRESSED DURING: 15 growth stages; CONTAINS InterPro DOMAIN/s: Uncharacterised protein family UPF0121 (InterPro:IPR005344); Has 72 Blast hits to 71 proteins in 25 species: Archae - 0; Bacteria - 0; Metazoa - 2; Fungi - 2; Plants - 60; Viruse…
contig33574	4.66735	3.91258	4.40059	2.84088	0.203782
contig46081	17.7255	14.7802	17.7224	14.4484	0.111352
contig42993	2.79301	1.69591	1.97222	2.10986	0.217677
contig84486	4.0948	2.98262	2.94806	3.5516	0.159931
contig64480	1.83172	1.2753	1.13993	1.67669	0.220519				GO:0030234	AT2G26760.1	Cyclin B1;4
contig22387	11.097	9.86335	13.1291	9.59186	0.147579					AT3G10210.1	SEC14 cytosolic factor family protein / phosphoglyceride transfer family protein
contig78613	1.85683	1.29426	1.51474	1.37152	0.164986				GO:0005739	AT5G27460.1	Tetratricopeptide repeat (TPR)-like superfamily protein
contig7837	32.5274	32.6098	45.4657	29.1974	0.205675				GO:0006629	AT1G11910.1	aspartic proteinase A1
contig49798	4.7558	4.9362	5.40509	3.85722	0.136786				GO:0005737
contig55880	1.70312	1.86219	2.46864	1.99888	0.164271
contig114541	3.545	3.48939	2.77536	3.05768	0.113824
contig17397	37.0599	34.7381	41.989	26.1824	0.188777				GO:0016020	AT1G33810.1	unknown protein; FUNCTIONS IN: molecular_function unknown; INVOLVED IN: biological_process unknown; LOCATED IN: chloroplast thylakoid membrane chloroplast chloroplast envelope; EXPRESSED IN: 22 plant structures; EXPRESSED DURING: 13 growth stages; Has 39 Blast hits to 39 proteins in 18 species: Archae - 0; Bacteria - 0; Metazoa - 0; Fungi - 0; Plants - 39; Viruses - 0; Other Eukaryotes - 0 (sourc…
contig34244	2.62293	2.41656	3.26184	2.65423	0.132984					AT5G58210.3	hydroxyproline-rich glycoprotein family protein
contig34553	1.70865	1.41389	1.52427	1.32512	0.110686				GO:0016020	AT4G14290.1	alpha/beta-Hydrolases superfamily protein
contig51367	9.71341	7.91588	8.23659	6.23847	0.177651
contig55851	1.70717	1.75001	1.93029	1.48505	0.106515
contig13090	21.0363	16.079	14.9289	22.1184	0.192294
contig26650	14.9011	9.10626	12.6952	12.0462	0.196102				GO:0005829	AT2G46020.2	transcription regulatory protein SNF2 putative
contig4186	4.29	2.81516	2.67915	3.94055	0.234489
contig2545	4.03597	4.06787	4.75182	3.42078	0.133669				GO:0005488	AT5G63200.1	tetratricopeptide repeat (TPR)-containing protein
contig26804	1.03507	0.826093	1.19765	0.848288	0.178695
contig32492	4.74136	6.35336	6.49451	3.76767	0.246355				GO:0006950	AT3G54850.1	plant U-box 14
contig27626	8.58653	6.07129	5.92879	8.739	0.210012				GO:0006810	AT2G40860.1	protein kinase family protein / protein phosphatase 2C ( PP2C) family protein
contig36822	25.1641	18.1859	21.4802	24.2022	0.140675				GO:0006464	AT3G17850.1	Protein kinase superfamily protein
contig1352	14.5776	14.5764	19.9256	13.4212	0.186765				GO:0003677	AT1G19140.2	FUNCTIONS IN: molecular_function unknown; INVOLVED IN: ubiquinone biosynthetic process; LOCATED IN: mitochondrion; EXPRESSED IN: 24 plant structures; EXPRESSED DURING: 15 growth stages; CONTAINS InterPro DOMAIN/s: COQ9 (InterPro:IPR013718) Ubiquinone biosynthesis protein COQ9 (InterPro:IPR012762); Has 35333 Blast hits to 34131 proteins in 2444 species: Archae - 798; Bacteria - 22429; Metazoa - 97…
contig29817	3.97027	3.75218	6.12349	4.63256	0.231661					AT1G11950.1	Transcription factor jumonji (jmjC) domain-containing protein
contig5374	28.5278	21.9014	33.2924	24.6558	0.182541				GO:0005886	AT2G19830.1	SNF7 family protein
contig48570	2.21118	1.89289	1.66018	2.17086	0.130053
contig38446	4.93271	4.27659	4.36288	4.02178	0.0874073				GO:0016787	AT4G39370.3	ubiquitin-specific protease 27
contig41881	3.22872	2.80051	2.548	1.98681	0.196441				GO:0000166	AT3G01490.1	Protein kinase superfamily protein
contig21680	17.8661	14.8398	16.8973	17.0963	0.0775267
contig25646	5.34517	5.96959	6.74425	5.3166	0.114926					AT2G17350.1	unknown protein; Has 119 Blast hits to 93 proteins in 40 species: Archae - 0; Bacteria - 3; Metazoa - 18; Fungi - 12; Plants - 44; Viruses - 0; Other Eukaryotes - 42 (source: NCBI BLink).
contig1042	9.92054	8.09928	6.9955	7.90687	0.148861
contig54355	2.95872	2.36626	2.37095	1.9342	0.174731
contig25501	3.79261	4.04165	4.62022	3.88866	0.0907427				GO:0000166	AT5G60550.1	geminivirus rep interacting kinase 2
contig4779	4.31388	3.49056	4.1397	3.21711	0.13748
contig98170	0.790499	0.592624	0.630495	0.503504	0.190598				GO:0005488
contig24591	6.27583	4.20546	6.40244	4.62773	0.209093				GO:0005515	AT2G42080.1	Chaperone DnaJ-domain superfamily protein
contig98106	1.13407	0.954603	1.02004	0.84755	0.121327
contig126612	0.184728	0.133886	0.189409	0.129428	0.20143
contig76632	2.91545	2.62206	3.43748	2.08087	0.205019				GO:0005739	AT4G29000.1	Tesmin/TSO1-like CXC domain-containing protein
contig97861	1.38248	1.03267	0.922002	1.09291	0.177424
contig69257	43.3313	39.811	51.5275	37.5973	0.141982				GO:0005739
contig64904	2.81011	2.45739	3.45011	2.10228	0.212458				GO:0008135	AT4G36650.1	plant-specific TFIIB-related protein
contig86860	2.23196	1.89952	2.57581	1.6938	0.184199
contig44312	13.7776	8.09494	8.9033	10.1691	0.245255				GO:0005829	AT2G16940.2	Splicing factor CC1-like
contig60597	2.01056	1.31943	1.52879	1.43194	0.193426
contig41899	3.81477	2.73526	2.7729	2.72995	0.177454
contig11378	8.90475	7.77014	9.71267	7.05718	0.141036				GO:0016020	AT2G38020.1	vacuoleless1 (VCL1)
contig33353	3.35437	2.90771	3.10971	3.14296	0.0584504				GO:0005773	AT3G18430.1	Calcium-binding EF-hand family protein
contig11995	0.782166	0.625173	0.64918	0.577754	0.132985
contig25168	4.5166	4.31147	3.74789	2.94742	0.180899
contig98872	2.66888	1.78762	2.06189	1.78387	0.200628
contig129906	1.38211	1.42625	1.04269	1.09988	0.157099
contig11827	58.6557	56.639	64.1545	46.554	0.130132				GO:0005886	AT5G64130.3	cAMP-regulated phosphoprotein 19-related protein
contig80160	6.29393	4.62025	4.65561	5.1374	0.150908
contig48909	3.79642	2.51416	2.82054	3.89665	0.212901				GO:0006950	AT1G09210.1	calreticulin 1b
contig14846	4.31683	3.45861	4.3693	4.42447	0.110545				GO:0005739	AT1G32810.2	RING/FYVE/PHD zinc finger superfamily protein
contig28089	6.56662	4.82439	6.99304	4.74495	0.201554
contig66602	1.14736	1.00622	0.926134	1.10734	0.0955078
contig37656	8.02539	6.06182	5.89948	6.01926	0.156619				GO:0005737
contig39965	9.73349	6.27892	7.59652	10.2868	0.220363				GO:0019538	AT4G24560.1	ubiquitin-specific protease 16
contig61476	4.53072	4.1021	4.38241	2.99233	0.173945				GO:0006950	AT5G37370.1	PRP38 family protein
contig48335	2.43738	2.20708	2.68289	1.94489	0.136171
contig54979	0.476372	0.481225	0.665176	0.387454	0.232149					AT2G17240.1	unknown protein; FUNCTIONS IN: molecular_function unknown; INVOLVED IN: biological_process unknown; LOCATED IN: chloroplast; EXPRESSED IN: 23 plant structures; EXPRESSED DURING: 14 growth stages; BEST Arabidopsis thaliana protein match is: unknown protein (TAIR:AT3G24506.1); Has 2795 Blast hits to 943 proteins in 155 species: Archae - 0; Bacteria - 388; Metazoa - 809; Fungi - 72; Plants - 153; Vi…
contig77688	2.49908	3.53438	2.92984	2.86204	0.145203
contig116419	1.29322	1.58458	1.51963	1.40325	0.088779					AT2G02180.1	tobamovirus multiplication protein 3
contig2455	13.1415	10.2172	9.77673	11.3658	0.134989				GO:0005488	AT3G62900.1	CW-type Zinc Finger
contig1164	2.65132	2.15916	2.00305	2.28836	0.121464					AT4G32660.1	Protein kinase superfamily protein
contig22867	1.24637	1.12245	1.28986	1.32304	0.0704913
contig59933	1.26876	1.43137	1.27869	1.19016	0.0780428					AT2G18710.1	SECY homolog 1
contig6668	74.5471	68.1228	84.9245	57.5813	0.160839				GO:0005515	AT2G31200.1	actin depolymerizing factor 6
contig137325	1.46314	1.83343	1.24057	1.1583	0.21202					AT1G44542.1	Cyclase family protein
contig32442	1.41377	1.01694	1.33404	1.00505	0.177865				GO:0008289	AT1G14910.1	ENTH/ANTH/VHS superfamily protein
contig90441	2.23899	1.9476	2.52813	1.80167	0.151335					AT1G80570.2	RNI-like superfamily protein
contig61785	3.48259	3.02267	2.60428	3.22442	0.120254
contig32744	3.432	2.83384	3.6406	2.82988	0.130503
contig54116	3.30694	3.39152	3.83077	2.55844	0.161426
contig71509	1.39362	0.915888	1.25274	1.09499	0.17666
contig61929	3.07665	3.06655	3.01281	2.33404	0.125351
contig88137	0.930173	0.585378	0.733455	0.686844	0.197121
contig38582	14.1172	11.617	10.5115	12.1414	0.124709
contig51920	2.34201	1.90059	1.73423	1.78507	0.142538
contig48028	6.71167	6.75105	7.84136	5.75361	0.126149					AT1G21065.1	unknown protein; INVOLVED IN: biological_process unknown; LOCATED IN: chloroplast; EXPRESSED IN: 22 plant structures; EXPRESSED DURING: 13 growth stages; CONTAINS InterPro DOMAIN/s: Uncharacterised protein family UPF0047 (InterPro:IPR001602); Has 3800 Blast hits to 3784 proteins in 1137 species: Archae - 215; Bacteria - 2154; Metazoa - 42; Fungi - 99; Plants - 99; Viruses - 0; Other Eukaryotes - …
contig68242	5.45414	5.41965	6.43718	3.55918	0.230379				GO:0005515	AT3G15580.1	Ubiquitin-like superfamily protein
contig114442	1.65725	1.49246	1.12249	1.38503	0.158705					AT5G09680.1	reduced lateral root formation
contig33602	21.7075	29.5832	26.9477	22.2067	0.151454					AT5G57580.1	Calmodulin-binding protein
contig6439	7.46775	7.23997	6.58142	6.74407	0.0592232				GO:0009536	AT5G17280.1	CONTAINS InterPro DOMAIN/s: Oxidoreductase-like N-terminal (InterPro:IPR019180); Has 1807 Blast hits to 1807 proteins in 277 species: Archae - 0; Bacteria - 0; Metazoa - 736; Fungi - 347; Plants - 385; Viruses - 0; Other Eukaryotes - 339 (source: NCBI BLink).
contig105843	0.445027	0.361822	0.420105	0.248086	0.23777
contig65194	13.6408	10.8012	15.8209	15.2441	0.162016				GO:0016740	AT5G11110.1	sucrose phosphate synthase 2F
contig37165	2.80809	4.06379	3.44775	3.68471	0.150548				GO:0003677	AT2G33860.1	Transcriptional factor B3 family protein / auxin-responsive factor AUX/IAA-related
contig19521	7.61585	5.00105	6.34477	6.02915	0.172467
contig26334	10.1976	6.87934	8.18558	9.27134	0.165584				GO:0016020	AT4G33350.1	Tic22-like family protein
contig31606	20.7643	19.8438	23.7918	16.3873	0.150948				GO:0009607	AT5G10270.1	cyclin-dependent kinase C;1
contig73652	0.461726	0.442136	0.429046	0.583749	0.148184					AT3G62240.1	RING/U-box superfamily protein
contig14977	4.99935	3.81358	3.87254	3.71591	0.147014				GO:0009536	AT5G16950.1	unknown protein; Has 1807 Blast hits to 1807 proteins in 277 species: Archae - 0; Bacteria - 0; Metazoa - 736; Fungi - 347; Plants - 385; Viruses - 0; Other Eukaryotes - 339 (source: NCBI BLink).
contig67459	0.952976	0.930365	0.734414	0.54618	0.240758				GO:0005739	AT5G07900.1	Mitochondrial transcription termination factor family protein
contig12122	16.8125	13.9462	18.3405	15.0143	0.121216				GO:0005829	AT1G50380.1	Prolyl oligopeptidase family protein
contig56900	2.99799	2.2752	1.87962	2.06043	0.21297					AT3G50430.1	unknown protein; Has 54 Blast hits to 54 proteins in 22 species: Archae - 0; Bacteria - 0; Metazoa - 29; Fungi - 0; Plants - 24; Viruses - 0; Other Eukaryotes - 1 (source: NCBI BLink).
contig69842	1.6184	1.23126	1.93056	1.19928	0.232358				GO:0008152	AT3G13800.1	Metallo-hydrolase/oxidoreductase superfamily protein
contig133480	1.12271	0.870828	1.24327	1.17732	0.147507
contig1292	42.868	38.5095	47.7694	41.4758	0.0905723				GO:0005829	AT1G80490.2	TOPLESS-related 1
contig48264	5.66657	5.73529	6.00211	4.65731	0.10698				GO:0008152	AT5G48820.2	inhibitor/interactor with cyclin-dependent kinase
contig5189	1.88133	1.28249	1.66694	1.86301	0.166192				GO:0005622	AT3G21480.1	BRCT domain-containing DNA repair protein
contig78957	3.64244	3.81446	2.95195	3.64952	0.109094
contig25344	12.5756	12.2766	13.3754	7.93219	0.212262				GO:0003723	AT5G64200.1	ortholog of human splicing factor SC35
contig39361	1.21695	1.15311	1.66561	1.10282	0.201032				GO:0003824	ATMG00860.1	DNA/RNA polymerases superfamily protein
contig24648	2.49499	1.87264	1.99193	2.19833	0.127384					AT3G03940.1	Protein kinase family protein
contig39004	8.72053	6.11862	5.56959	7.63649	0.204836
contig93534	13.3938	7.84106	9.22604	9.15025	0.24363
contig52800	2.71624	2.70159	3.73208	2.20909	0.225329
contig47112	1.32489	1.37658	1.42639	1.05198	0.129118
contig43623	2.48184	1.70638	1.96492	1.93893	0.16175
contig12249	55.8648	63.6187	70.5837	52.8945	0.131194				GO:0006464	AT1G64230.4	ubiquitin-conjugating enzyme 28
contig25504	3.5904	3.37898	3.04158	3.12818	0.0757926					AT1G45150.1	unknown protein; Has 219 Blast hits to 202 proteins in 78 species: Archae - 0; Bacteria - 166; Metazoa - 0; Fungi - 0; Plants - 36; Viruses - 0; Other Eukaryotes - 17 (source: NCBI BLink).
contig70659	4.34311	3.59328	4.20434	3.07892	0.153327
contig71972	1.36531	1.53144	1.58643	1.3133	0.0900644					AT4G02210.1	unknown protein; BEST Arabidopsis thaliana protein match is: unknown protein (TAIR:AT2G24960.2); Has 791 Blast hits to 465 proteins in 19 species: Archae - 0; Bacteria - 0; Metazoa - 0; Fungi - 17; Plants - 748; Viruses - 0; Other Eukaryotes - 26 (source: NCBI BLink).
contig670	24.9787	16.7425	23.2186	19.4258	0.175967				GO:0005829	AT1G65440.1	global transcription factor group B1
contig7614	7.54447	5.57374	7.12455	5.92723	0.143919				GO:0000166	AT3G09010.1	Protein kinase superfamily protein
contig41952	4.92056	3.42589	3.00462	4.09492	0.216672
contig61255	2.6045	1.71196	2.36336	2.37682	0.169776				GO:0006259	AT2G32000.1	DNA topoisomerase type IA core
contig84150	11.6079	8.80368	9.03811	9.46397	0.131825				GO:0008152	AT1G04420.1	NAD(P)-linked oxidoreductase superfamily protein
contig65502	8.25635	5.70946	7.69165	7.89349	0.154714
contig45603	1.35435	0.970764	1.05062	1.13572	0.146589
contig78969	0.385953	0.348931	0.353705	0.30431	0.0964264				GO:0005488	AT3G62240.1	RING/U-box superfamily protein
contig29942	2.06136	1.9209	2.6172	1.8889	0.159496				GO:0003700	AT2G47900.3	tubby like protein 3
contig129223	0.407116	0.285151	0.380549	0.310586	0.165978
contig86278	3.70926	2.83622	2.67157	2.56623	0.176842				GO:0009536
contig74781	0.685587	0.664375	0.733118	0.536092	0.128578
contig16344	10.0202	7.36831	7.93051	9.3601	0.141901					AT5G58720.1	smr (Small MutS Related) domain-containing protein
contig82555	1.43083	1.01713	1.12395	1.37942	0.16088
contig9162	12.0705	9.51264	11.1179	9.81625	0.111631				GO:0006519	AT3G49680.1	branched-chain aminotransferase 3
contig4917	10.5342	7.8191	8.74812	7.81979	0.146593					AT3G55600.1	Membrane fusion protein Use1
contig9722	6.91295	4.99166	7.06941	5.74317	0.159965				GO:0005488	AT1G09060.3	Zinc finger RING-type;Transcription factor jumonji/aspartyl beta-hydroxylase
contig11949	24.0228	18.2249	23.9099	17.5379	0.16845				GO:0006519	AT2G31810.1	ACT domain-containing small subunit of acetolactate synthase protein
contig692	4.43248	2.88607	3.57419	4.56459	0.20345				GO:0006464	AT3G53090.1	ubiquitin-protein ligase 7
contig22873	40.9676	41.8387	32.6352	38.4891	0.107802
contig42571	6.10233	6.6653	6.6126	4.31276	0.18626				GO:0016043	AT4G34660.1	SH3 domain-containing protein
contig76559	20.1881	16.2083	14.7884	16.506	0.136049					AT5G64730.1	Transducin/WD40 repeat-like superfamily protein
contig65387	0.949162	0.690832	0.95252	0.879479	0.141493
contig63942	6.21735	9.04238	6.53519	6.30313	0.192459				GO:0016020	AT2G13650.1	golgi nucleotide sugar transporter 1
contig15076	32.0518	25.0395	36.0721	25.6446	0.178472				GO:0005515	AT4G29160.1	SNF7 family protein
contig23271	5.83882	6.44667	7.52635	4.83065	0.183153				GO:0016787	AT1G27150.1	Tetratricopeptide repeat (TPR)-like superfamily protein
contig128327	0.289251	0.261483	0.284079	0.22626	0.108059				GO:0009653	AT5G58230.1	Transducin/WD40 repeat-like superfamily protein
contig17016	15.0011	8.52569	11.1419	12.0248	0.228731
contig7777	1.42606	1.49429	1.37432	1.23173	0.0805877				GO:0005515	AT2G06005.1	FRIGIDA interacting protein 1
contig9942	8.27484	7.94791	8.06246	6.80823	0.0845866				GO:0005488	AT3G19950.1	RING/U-box superfamily protein
contig72606	1.63343	1.31516	1.53784	1.11833	0.164827				GO:0005488	AT1G33420.1	RING/FYVE/PHD zinc finger superfamily protein
contig3082	7.15422	6.52835	6.30141	6.24322	0.0635743
contig15925	46.2294	40.9264	61.581	57.218	0.185577				GO:0006139	AT2G39780.1	ribonuclease 2
contig34140	1.24963	0.780628	0.998719	1.04338	0.188948					AT5G19480.1	unknown protein; BEST Arabidopsis thaliana protein match is: unknown protein (TAIR:AT5G12230.1); Has 1807 Blast hits to 1807 proteins in 277 species: Archae - 0; Bacteria - 0; Metazoa - 736; Fungi - 347; Plants - 385; Viruses - 0; Other Eukaryotes - 339 (source: NCBI BLink).
contig144549	0.520185	0.733656	0.503093	0.748416	0.211967
contig12225	27.1305	22.8506	30.6729	20.7216	0.175237				GO:0006810	AT3G07560.1	peroxin 13
contig48098	5.29333	4.17243	5.46956	5.81843	0.137154
contig102388	3.63986	2.28594	3.04478	2.66697	0.198382
contig17642	3.43934	2.23256	2.38994	2.72872	0.198712				GO:0016301	AT3G56760.1	Protein kinase superfamily protein
contig57401	1.86395	1.63417	1.9291	1.91538	0.0747507					AT5G37870.1	Protein with RING/U-box and TRAF-like domains
contig46337	2.30533	1.58399	2.23762	1.9768	0.16136				GO:0019538	AT1G62710.1	beta vacuolar processing enzyme
contig65808	1.45107	1.14056	1.18795	1.09395	0.131159
contig123717	0.25596	0.232307	0.196921	0.237267	0.106944
contig57197	1.38564	0.832285	0.915062	0.943767	0.244146				GO:0007165	AT2G26300.1	G protein alpha subunit 1
contig6331	14.7584	8.85787	13.7283	13.8743	0.20854				GO:0009908	AT5G61150.1	leo1-like family protein
contig38846	7.43434	7.04383	8.91577	6.37211	0.144634					AT4G28300.1	Protein of unknown function (DUF1421)
contig38388	3.78682	3.35426	3.26977	2.96778	0.101132				GO:0005634	AT3G61860.1	RNA-binding (RRM/RBD/RNP motifs) family protein
contig80543	1.87692	1.31984	1.33648	1.84882	0.19367
contig49842	2.5589	1.89195	1.54731	1.61686	0.242372				GO:0005623	AT1G34270.1	Exostosin family protein
contig13226	24.1568	28.1272	28.0094	19.9117	0.155334				GO:0005488
contig33450	3.42018	3.6968	3.40672	2.50324	0.159612
contig14575	2.50233	2.33606	2.57824	1.74128	0.165628
contig35488	7.15784	7.15762	5.73425	4.10044	0.241048
contig27054	2.50626	1.88804	2.19698	2.21741	0.114701
contig79188	1.90028	1.58346	1.66754	1.91374	0.0941007
contig69626	1.65775	1.51492	1.95	1.70235	0.106137
contig39202	6.95919	5.61889	5.56986	4.3306	0.191062
contig16324	4.35303	4.87207	4.94781	4.09415	0.0900594				GO:0008152	AT4G11480.1	cysteine-rich RLK (RECEPTOR-like protein kinase) 32
contig126608	5.43566	5.37029	5.6661	5.44094	0.0236009
contig15825	1.55632	1.39507	1.78013	1.16059	0.177438
contig31504	10.123	7.89717	7.59967	7.26497	0.157385				GO:0006810	AT3G46980.3	phosphate transporter 4;3
contig28499	21.1821	18.4788	16.2101	11.8175	0.234237				GO:0006629	AT2G15230.1	lipase 1
contig65694	0.74354	0.731405	0.622502	0.55682	0.135012				GO:0006464	AT3G47580.1	Leucine-rich repeat protein kinase family protein
contig97738	1.61478	1.22824	1.48481	1.12968	0.164338
contig30764	3.63776	2.75796	2.66718	3.66579	0.170838
contig25111	9.33123	9.25069	8.85953	6.91869	0.131911				GO:0009536	AT5G25770.3	alpha/beta-Hydrolases superfamily protein
contig2734	12.4377	14.4041	12.8353	12.1049	0.0785761				GO:0005739	AT4G25150.1	HAD superfamily subfamily IIIB acid phosphatase
contig67628	1.36524	1.10039	1.25987	1.27216	0.0879812
contig67109	2.12868	2.34333	1.96346	2.51676	0.108263				GO:0016020	AT1G63120.1	RHOMBOID-like 2
contig43344	2.28734	1.93362	2.09684	1.85083	0.0943997				GO:0005737
contig6219	11.9054	8.19399	11.3965	7.73173	0.219003				GO:0019538	AT3G14270.1	phosphatidylinositol-4-phosphate 5-kinase family protein
contig10974	4.89773	5.9351	4.42052	3.34298	0.23146
contig31508	10.5733	7.20134	9.49043	9.39169	0.154275				GO:0016043	AT5G15540.1	PHD finger family protein
contig9759	4.21499	3.21711	4.31017	3.31357	0.15367				GO:0005488	AT1G04790.1	RING/U-box superfamily protein
contig103659	0.595274	0.439433	0.662289	0.48321	0.187242
contig107299	0.736693	0.790149	0.93535	0.540873	0.217341				GO:0003824	AT4G21770.1	Pseudouridine synthase family protein
contig13428	6.17843	4.13888	4.8844	4.17691	0.196708
contig85017	0.74066	0.632196	0.653572	0.471169	0.180029
contig64950	2.2255	2.25248	2.03546	1.74494	0.113323
contig25261	5.64995	5.28689	6.20303	4.95963	0.0964394				GO:0016787	AT1G48320.1	Thioesterase superfamily protein
contig10060	6.18534	6.07058	7.68872	5.43733	0.15034				GO:0004518	AT1G65580.1	Endonuclease/exonuclease/phosphatase family protein
contig27048	0.682173	0.516191	0.574164	0.458	0.171469					AT3G24255.1	RNA-directed DNA polymerase (reverse transcriptase)-related family protein
contig25771	10.0159	6.46431	9.50337	8.23285	0.184943					AT1G33500.1	unknown protein; Has 30201 Blast hits to 17322 proteins in 780 species: Archae - 12; Bacteria - 1396; Metazoa - 17338; Fungi - 3422; Plants - 5037; Viruses - 0; Other Eukaryotes - 2996 (source: NCBI BLink).
contig62357	3.58344	2.6926	3.92186	3.98564	0.167972
contig55929	7.1147	6.69834	7.01317	7.834	0.066978
contig57394	3.49314	2.7725	3.07081	3.22351	0.0958112
contig56032	2.09844	1.98762	2.50264	1.99266	0.113557
contig20886	7.80316	6.45842	9.80273	7.52763	0.176756				GO:0009790	AT5G62090.1	SEUSS-like 2
contig22513	16.9906	12.0655	9.61979	14.1909	0.237078
contig24202	9.94817	6.5205	6.72679	8.67116	0.205635				GO:0003676	AT5G43130.2	TBP-associated factor 4
contig28999	11.4792	7.54158	8.89723	8.50432	0.184697				GO:0008152	AT5G11850.1	Protein kinase superfamily protein
contig91967	2.74593	2.3625	2.0623	1.68806	0.202707
contig15533	9.17014	7.84047	8.99704	7.50714	0.0988527				GO:0005886	AT5G23490.1	unknown protein; BEST Arabidopsis thaliana protein match is: unknown protein (TAIR:AT5G08440.1); Has 202 Blast hits to 197 proteins in 48 species: Archae - 0; Bacteria - 13; Metazoa - 25; Fungi - 9; Plants - 109; Viruses - 0; Other Eukaryotes - 46 (source: NCBI BLink).
contig14550	12.6337	11.8776	17.1396	12.7855	0.175392
contig33185	2.02569	1.43231	1.42237	1.20789	0.230837				GO:0016020	AT4G21570.1	Protein of unknown function (DUF300)
contig57593	2.61927	2.77789	2.04686	2.20235	0.142465
contig7451	69.3847	47.7831	70.083	65.5303	0.165645				GO:0005829	AT1G63000.1	nucleotide-rhamnose synthase/epimerase-reductase
contig148557	1.5614	1.32531	1.22989	1.26541	0.110903
contig61297	0.435121	0.437118	0.585594	0.36481	0.203923
contig76779	3.45902	2.74052	3.18947	2.52573	0.142043
contig71027	2.38882	2.38393	2.09657	1.95374	0.0981782
contig58264	1.32328	1.35652	1.38388	0.962539	0.157232				GO:0003700	AT2G17410.1	ARID/BRIGHT DNA-binding domain-containing protein
contig110747	0.160611	0.166137	0.195526	0.119704	0.194486
contig46498	5.42541	3.99511	4.69475	5.75608	0.158136				GO:0005856	AT1G80260.1	Spc97 / Spc98 family of spindle pole body (SBP) component
contig3441	2.29413	1.82136	1.7199	2.07113	0.130546
contig9321	1.59319	1.17802	1.3954	0.924265	0.225973
contig17869	2.58163	1.99255	2.11532	2.24811	0.113642
contig26459	12.2778	14.2351	12.2048	11.7866	0.0866695				GO:0005634	AT3G29575.1	ABI five binding protein 3
contig48591	7.77783	4.97645	6.28063	5.66142	0.19347
contig23301	34.5409	28.5648	31.844	21.8936	0.186779				GO:0003676	AT2G37340.1	arginine/serine-rich zinc knuckle-containing protein 33
contig66261	6.91177	6.16224	4.69696	6.63885	0.161716
contig5426	14.8591	11.7167	13.1108	13.0306	0.097836				GO:0030154	AT1G55350.5	calpain-type cysteine protease family
contig58805	11.7995	7.6945	8.72356	13.173	0.248069
contig27917	81.6079	74.7138	90.3668	92.7298	0.0976036				GO:0003824	AT3G48170.1	aldehyde dehydrogenase 10A9
contig23389	3.07668	2.70575	3.38045	3.51538	0.113436
contig125413	1.0743	0.922615	1.01092	0.805148	0.122416
contig38068	1.72882	1.17498	1.1037	1.28333	0.212166
contig22323	3.92729	4.22677	3.46761	3.12781	0.131925
contig46577	0.655203	0.718649	0.432878	0.573947	0.207239
contig15882	11.9753	8.30055	12.3455	11.174	0.167322				GO:0016020	AT3G27530.1	golgin candidate 6
contig52515	2.16214	1.44559	1.59273	1.49059	0.198479
contig58059	4.54002	2.99723	3.28797	2.94635	0.216893				GO:0003723	AT3G06950.1	Pseudouridine synthase family protein
contig84634	4.1945	4.12825	5.21883	3.45585	0.171172
contig41103	10.45	9.69006	9.68465	11.4657	0.0816281				GO:0016787	AT2G19440.1	O-Glycosyl hydrolases family 17 protein
contig106782	0.559733	0.393192	0.545001	0.524897	0.150989
contig30645	16.2044	10.5177	12.8494	14.3139	0.178209				GO:0005886	AT1G73450.1	Protein kinase superfamily protein
contig119629	3.80435	3.73665	3.05647	3.66175	0.0964592				GO:0007165	AT1G08340.1	Rho GTPase activating protein with PAK-box/P21-Rho-binding domain
contig65010	8.49578	4.75422	6.26256	6.91532	0.234706
contig48476	2.00321	2.27178	2.49506	1.77287	0.147288
contig34761	3.10422	2.11642	2.33413	2.88085	0.176671					AT3G61420.1	BSD domain (BTF2-like transcription factors Synapse-associated proteins and DOS2-like proteins)
contig18389	2.63287	2.20936	2.15798	2.13982	0.102306
contig8646	9.1147	7.4927	10.5127	8.40332	0.143505				GO:0016020	AT3G27530.1	golgin candidate 6
contig6388	38.6247	45.3173	46.6741	30.1758	0.187853				GO:0006464	AT1G71830.1	somatic embryogenesis receptor-like kinase 1
contig88356	0.717669	0.656588	0.933319	0.781018	0.153923
contig72701	3.48336	2.70744	3.02657	2.70162	0.12366
contig102809	1.44135	0.937371	1.26009	1.71574	0.243956					AT2G34840.1	Coatomer epsilon subunit
contig49010	1.97738	1.77614	2.2543	1.24647	0.23482				GO:0016020	AT1G04970.1	lipid-binding serum glycoprotein family protein
contig47647	40.3599	30.7931	32.8588	30.8829	0.134199				GO:0005739	AT1G69340.1	appr-1-p processing enzyme family protein
contig31989	2.30625	1.80098	2.08235	1.48959	0.184154				GO:0005488	AT4G38180.1	FAR1-related sequence 5
contig63565	33.9548	27.049	31.6266	32.2335	0.0944329
contig28869	4.28847	3.90334	5.58145	3.45914	0.212166				GO:0005739	AT1G76660.1	FUNCTIONS IN: molecular_function unknown; INVOLVED IN: biological_process unknown; LOCATED IN: plasma membrane; EXPRESSED IN: 22 plant structures; EXPRESSED DURING: 13 growth stages; BEST Arabidopsis thaliana protein match is: hydroxyproline-rich glycoprotein family protein (TAIR:AT5G52430.1); Has 353 Blast hits to 231 proteins in 60 species: Archae - 0; Bacteria - 6; Metazoa - 57; Fungi - 22; Pl…
contig86547	3.83416	4.88648	5.14343	3.5203	0.181747
contig41036	2.7822	2.40041	3.4612	2.12427	0.215232
contig79991	0.517963	0.392686	0.427234	0.474335	0.120741
contig25190	6.7281	3.652	5.62284	5.53664	0.237013				GO:0003824	AT3G02280.1	Flavodoxin family protein
contig12205	1.7468	1.47193	1.1341	1.46452	0.172357
contig2889	12.4617	9.86343	10.4988	11.6727	0.104711				GO:0040029	AT4G19020.1	chromomethylase 2
contig22797	1.61736	0.908286	1.07849	1.32899	0.250471				GO:0008152	AT1G30590.1	RNA polymerase I specific transcription initiation factor RRN3 protein
contig36331	8.99935	11.7569	11.2076	8.38629	0.163089				GO:0016020	AT1G15080.1	lipid phosphate phosphatase 2
contig36743	18.2178	10.3518	11.6922	14.0659	0.254095				GO:0000166	AT1G50410.1	SNF2 domain-containing protein / helicase domain-containing protein / zinc finger protein-related
contig128312	2.82011	2.48675	2.70073	1.94183	0.156372
contig85136	2.15366	2.53746	2.66328	3.23586	0.169253
contig59273	2.73305	2.04928	2.12365	1.91384	0.164456
contig84192	3.39421	2.83649	2.51381	2.52305	0.146641
contig14061	8.00836	6.64927	9.6441	7.16744	0.166545				GO:0000166	AT1G33980.2	Smg-4/UPF3 family protein
contig44196	19.1872	22.0118	20.0667	16.6334	0.1146				GO:0005773	AT2G04690.1	Pyridoxamine 5'-phosphate oxidase family protein
contig82659	0.515467	0.310478	0.403024	0.463052	0.207957
contig35744	5.72779	3.92573	5.91304	4.81274	0.179766				GO:0005488	AT5G35210.1	metalloendopeptidases;zinc ion binding;DNA binding
contig9374	16.6191	16.3951	15.8017	13.4119	0.0945578				GO:0006950	AT1G16890.3	ubiquitin-conjugating enzyme 36
contig117536	0.2445	0.23942	0.30983	0.197122	0.187863
contig36721	8.90646	6.2742	6.9765	7.75178	0.150837				GO:0005488	AT1G12930.1	ARM repeat superfamily protein
contig41868	1.90117	1.95741	2.25642	1.31579	0.21181					AT1G16930.1	F-box/RNI-like/FBD-like domains-containing protein
contig119455	1.98294	1.30817	1.70592	1.96291	0.180632
contig4758	11.3264	9.18032	13.8487	11.8824	0.1661				GO:0003824	AT1G35190.1	2-oxoglutarate (2OG) and Fe(II)-dependent oxygenase superfamily protein
contig32621	3.85968	2.87914	3.50988	2.9276	0.14378
contig3624	52.8554	42.6742	45.4842	37.4257	0.144184				GO:0005829	AT1G79230.1	mercaptopyruvate sulfurtransferase 1
contig23354	9.64364	7.58236	6.30134	9.60675	0.197403				GO:0005488	AT1G66810.1	Zinc finger C-x8-C-x5-C-x3-H type family protein
contig19891	4.65785	3.1824	3.97378	3.45594	0.17008
contig9756	25.252	29.7097	33.8847	23.7846	0.162455				GO:0005773	AT4G38220.2	Peptidase M20/M25/M40 family protein
contig18658	2.02699	1.4847	1.91192	1.40031	0.181574				GO:0009536	AT1G74310.1	heat shock protein 101
contig4511	70.1055	63.1049	72.2863	38.8184	0.251289					AT5G57000.1	unknown protein; FUNCTIONS IN: molecular_function unknown; INVOLVED IN: biological_process unknown; LOCATED IN: cellular_component unknown; EXPRESSED IN: 24 plant structures; EXPRESSED DURING: 15 growth stages; BEST Arabidopsis thaliana protein match is: unknown protein (TAIR:AT1G72690.1); Has 153 Blast hits to 116 proteins in 29 species: Archae - 0; Bacteria - 6; Metazoa - 33; Fungi - 7; Plants …
contig10461	58.407	54.5283	68.8941	47.4898	0.155874				GO:0005739
contig25195	17.9296	12.7307	19.817	17.9753	0.178286				GO:0005777	AT3G03490.1	peroxin 19-1
contig2603	14.7373	9.02333	15.0578	12.4401	0.217208
contig21788	5.18973	4.45334	3.77635	3.95126	0.145861				GO:0009536	AT3G54190.1	Transducin/WD40 repeat-like superfamily protein
contig21107	6.78194	4.7209	6.98613	4.9772	0.201565					AT3G19190.1	autophagy 2
contig25890	5.64117	3.68379	3.54684	4.22056	0.224024				GO:0003677	AT4G10930.1	unknown protein; LOCATED IN: cellular_component unknown; EXPRESSED IN: 23 plant structures; EXPRESSED DURING: 14 growth stages; Has 30201 Blast hits to 17322 proteins in 780 species: Archae - 12; Bacteria - 1396; Metazoa - 17338; Fungi - 3422; Plants - 5037; Viruses - 0; Other Eukaryotes - 2996 (source: NCBI BLink).
contig74725	2.04343	1.74672	1.93593	1.69098	0.0884406
contig76717	4.77658	4.06176	3.2531	4.35389	0.156401
contig17038	11.2039	9.32223	13.5709	9.63706	0.177555				GO:0006350	AT4G19600.1	Cyclin family protein
contig75473	1.21339	0.957847	1.28674	1.05435	0.132343				GO:0003723	AT5G04430.2	binding to TOMV RNA 1L (long form)
contig92485	0.6669	0.46111	0.633055	0.54252	0.16115
contig9958	9.56835	6.96521	9.68206	7.80972	0.157292					AT5G23390.1	Plant protein of unknown function (DUF639)
contig54318	1.62263	1.06101	1.37411	1.59129	0.183347
contig77869	0.533904	0.340608	0.428464	0.419463	0.18432					AT1G04140.2	Transducin family protein / WD-40 repeat family protein
contig95604	1.91676	1.35142	1.36754	1.76902	0.178378
contig30648	5.5369	3.37245	4.07914	3.65475	0.23127
contig80492	1.06799	0.74218	0.719066	0.907538	0.189181
contig3750	14.4136	8.75046	12.3184	13.8785	0.206877				GO:0006810	AT1G22180.2	Sec14p-like phosphatidylinositol transfer family protein
contig30581	12.9637	8.11573	10.2	10.5173	0.190078				GO:0016043	AT2G23740.2	nucleic acid binding;sequence-specific DNA binding transcription factors;zinc ion binding
contig72073	2.75263	2.57475	2.66024	2.46864	0.0463426					AT1G73350.2	unknown protein; FUNCTIONS IN: molecular_function unknown; INVOLVED IN: biological_process unknown; EXPRESSED IN: 25 plant structures; EXPRESSED DURING: 15 growth stages; Has 50 Blast hits to 50 proteins in 20 species: Archae - 0; Bacteria - 0; Metazoa - 7; Fungi - 3; Plants - 36; Viruses - 0; Other Eukaryotes - 4 (source: NCBI BLink).
contig56811	3.06466	2.60555	2.2265	1.86479	0.210818
contig55133	3.12449	2.43029	2.99672	1.87491	0.220035
contig123152	3.71619	2.7916	2.72676	3.36632	0.150568
contig50255	9.60498	6.33005	7.69925	8.69788	0.173711
contig57812	9.3956	6.0463	6.23845	5.85951	0.244139
contig10697	3.8047	2.84418	3.23094	2.49496	0.181427
contig11953	4.62833	3.79114	4.47245	3.24703	0.158297				GO:0005488	AT3G27670.1	ARM repeat superfamily protein
contig40428	1.0672	0.997265	0.842109	0.749469	0.158096
contig15210	11.5644	8.29403	12.3899	9.32523	0.183445				GO:0006259	AT3G09100.2	mRNA capping enzyme family protein
contig24933	7.78257	6.70493	5.92883	4.5914	0.214791
contig56325	3.48771	3.34022	5.17537	3.18576	0.244115				GO:0003700	AT4G29000.1	Tesmin/TSO1-like CXC domain-containing protein
contig61115	8.65622	5.511	6.55868	6.10234	0.204023				GO:0016020	AT5G11700.2	BEST Arabidopsis thaliana protein match is: glycine-rich protein (TAIR:AT4G32920.3); Has 8203 Blast hits to 3102 proteins in 389 species: Archae - 3; Bacteria - 5624; Metazoa - 852; Fungi - 139; Plants - 704; Viruses - 77; Other Eukaryotes - 804 (source: NCBI BLink).
contig55636	2.63324	2.27075	2.76525	1.72311	0.198527
contig19639	9.45727	7.60394	9.37476	8.60982	0.0982532				GO:0009536
contig28751	6.965	4.77657	4.75769	4.57936	0.215141					AT1G66510.1	AAR2 protein family
contig76244	8.02295	6.15493	6.35056	5.58053	0.160761
contig34545	4.61316	5.43794	5.91754	4.62704	0.124546					AT3G13480.1	unknown protein; FUNCTIONS IN: molecular_function unknown; INVOLVED IN: biological_process unknown; LOCATED IN: endomembrane system; EXPRESSED IN: 23 plant structures; EXPRESSED DURING: 13 growth stages; BEST Arabidopsis thaliana protein match is: unknown protein (TAIR:AT1G55475.1); Has 30201 Blast hits to 17322 proteins in 780 species: Archae - 12; Bacteria - 1396; Metazoa - 17338; Fungi - 3422;…
contig83386	2.04228	2.09465	1.85881	1.90177	0.0567809					AT4G27130.1	Translation initiation factor SUI1 family protein
contig21152	5.88877	5.00274	6.18281	3.89031	0.196677				GO:0006810	AT1G29820.1	Magnesium transporter CorA-like family protein
contig16193	190.872	183.915	216.423	182.814	0.0810775					AT2G04410.1	RPM1-interacting protein 4 (RIN4) family protein
contig27818	7.38951	6.07054	6.10413	4.35865	0.207924
contig19761	14.9146	10.3937	12.2757	10.4356	0.177347				GO:0005488	AT4G22140.1	PHD finger family protein / bromo-adjacent homology (BAH) domain-containing protein
contig3631	18.0151	11.1244	10.7583	14.3368	0.249141				GO:0030528	AT1G79000.2	histone acetyltransferase of the CBP family 1
contig25856	1.39263	0.828062	1.22216	1.30225	0.209694
contig17430	6.39401	5.1964	7.26678	5.86577	0.141452				GO:0016020	AT2G31260.1	autophagy 9 (APG9)
contig48089	0.65716	0.548012	0.637384	0.801234	0.158693
contig14844	6.68032	5.97882	8.17345	6.81125	0.132773				GO:0005634	AT5G61330.1	rRNA processing protein-related
contig669	28.7811	20.0171	28.3597	22.8087	0.171662				GO:0005829	AT1G65440.1	global transcription factor group B1
contig16760	3.30865	3.59939	3.29865	1.97874	0.238082				GO:0007275	AT5G37930.1	Protein with RING/U-box and TRAF-like domains
contig37786	1.84549	1.56986	2.01973	1.7869	0.102809				GO:0003676	AT3G02065.2	P-loop containing nucleoside triphosphate hydrolases superfamily protein
contig21205	2.70249	2.1151	2.82075	2.23738	0.139749					AT4G33280.1	AP2/B3-like transcriptional factor family protein
contig109571	0.449921	0.441417	0.585136	0.437014	0.149209					AT3G07360.1	plant U-box 9
contig2451	2.43578	1.6713	1.876	2.22323	0.167086				GO:0016740	AT4G00060.1	Nucleotidyltransferase family protein
contig1501	3.03591	1.87616	2.43683	2.38566	0.195029				GO:0005730	AT1G18450.1	actin-related protein 4
contig114599	1.16835	0.675229	1.17854	1.03088	0.232116
contig106065	0.512596	0.484524	0.641115	0.669059	0.159158
contig76639	5.35529	5.11127	4.90485	3.28228	0.201351				GO:0009536	AT1G20670.1	DNA-binding bromodomain-containing protein
contig76041	1.45996	1.20073	1.4774	1.52475	0.103065
contig85670	2.00752	1.62534	1.52765	1.74278	0.120159
contig27959	5.85646	4.67045	5.69453	5.57484	0.097586					AT1G03687.1	DTW domain-containing protein
contig20822	38.9249	28.249	33.6176	42.6099	0.174872
contig73985	1.9928	1.42455	1.73801	1.5537	0.147005
contig10707	155.265	147.1	197.83	154.416	0.141017					AT2G04410.1	RPM1-interacting protein 4 (RIN4) family protein
contig20637	4.68572	2.66928	3.3871	4.63338	0.256677					AT1G17450.2	B-block binding subunit of TFIIIC
contig63482	1.74312	1.26683	1.39728	1.19299	0.174141
contig102920	1.4097	1.2907	1.28132	0.94489	0.162307					AT1G28530.1	unknown protein; INVOLVED IN: biological_process unknown; LOCATED IN: chloroplast; EXPRESSED IN: 19 plant structures; EXPRESSED DURING: 10 growth stages; Has 20 Blast hits to 20 proteins in 6 species: Archae - 0; Bacteria - 0; Metazoa - 0; Fungi - 0; Plants - 20; Viruses - 0; Other Eukaryotes - 0 (source: NCBI BLink).
contig70243	1.95238	1.64831	1.46215	1.28521	0.179675
contig144811	0.828832	0.771261	0.660443	0.496569	0.212175
contig43025	0.779512	1.2198	0.829062	1.03988	0.209719
contig141633	0.214657	0.232867	0.265764	0.203922	0.118119					AT5G18960.1	FAR1-related sequence 12
contig63613	25.6395	20.0842	15.9409	27.265	0.233912			UP
contig81035	5.6822	4.51139	5.56587	3.35998	0.226624
contig5581	4.45482	3.172	4.22086	3.05858	0.191537				GO:0016020	AT4G32400.1	Mitochondrial substrate carrier family protein
contig57817	6.32006	6.09311	7.33388	4.94663	0.158702
contig89919	0.686244	0.59395	0.6974	0.776123	0.108383
contig18495	13.4282	12.6196	15.6514	10.0774	0.177782				GO:0016020	AT1G03670.1	ankyrin repeat family protein
contig14070	5.44903	5.35832	7.08549	4.32228	0.20561				GO:0005488	AT5G15790.1	RING/U-box superfamily protein
contig53183	2.32089	2.81727	3.26644	2.57275	0.146762				GO:0006810	AT4G34940.1	armadillo repeat only 1
contig85354	9.07418	6.95187	6.19731	6.78167	0.17342					AT5G11200.2	DEAD/DEAH box RNA helicase family protein
contig25854	28.7505	34.3149	31.7546	25.5939	0.125221
contig106177	0.667494	0.449758	0.400343	0.498732	0.230341
contig5221	26.8699	23.0696	35.8935	20.2248	0.257202				GO:0016301	AT1G10210.1	mitogen-activated protein kinase 1
contig13846	13.7413	9.95728	13.896	13.1153	0.145502				GO:0005737	AT3G51580.2	unknown protein; FUNCTIONS IN: molecular_function unknown; INVOLVED IN: biological_process unknown; LOCATED IN: endomembrane system; EXPRESSED IN: 24 plant structures; EXPRESSED DURING: 15 growth stages.
contig95965	1.73	1.10411	1.22348	1.7369	0.229524
contig42919	2.67744	1.76531	2.20541	1.89716	0.189646				GO:0030234	AT5G47080.1	casein kinase II beta chain 1
contig97480	0.245771	0.161384	0.245599	0.255023	0.193563				GO:0005739	AT5G07900.1	Mitochondrial transcription termination factor family protein
contig47076	1.15169	0.959807	1.24047	1.10216	0.105407				GO:0005488	AT2G30580.1	DREB2A-interacting protein 2
contig30174	3.85734	3.85523	3.75776	2.56412	0.179949					AT2G05630.2	Ubiquitin-like superfamily protein
contig42375	11.7612	7.99677	8.70111	7.76678	0.203882				GO:0006412	AT4G29080.1	phytochrome-associated protein 2
contig107285	2.2703	1.92684	2.3109	1.85175	0.112108
contig19878	48.0261	56.4675	65.8865	40.2993	0.209049				GO:0005515	AT2G06530.1	SNF7 family protein
contig30641	22.8033	22.5798	21.9243	16.521	0.142235					AT5G42850.1	Thioredoxin superfamily protein
contig18310	11.2378	7.7685	9.36776	11.0076	0.164104				GO:0005737	AT1G06840.1	Leucine-rich repeat protein kinase family protein
contig68645	1.0661	0.970603	0.926149	1.05795	0.0678074					AT5G41340.1	ubiquitin conjugating enzyme 4
contig116990	0.176407	0.199068	0.158577	0.24491	0.191669
contig44463	11.3394	12.0121	11.6452	10.0102	0.0775147				GO:0003700	AT1G53320.1	tubby like protein 7
contig18834	17.1519	16.8973	18.1604	15.0931	0.0759166					AT2G36680.1	Modifier of rudimentary (Mod(r)) protein
contig11970	3.50967	2.6261	2.39757	2.32446	0.200959				GO:0005488	AT1G08060.1	ATP-dependent helicase family protein
contig77446	2.6886	1.68372	1.78416	1.93817	0.225075				GO:0006810	AT5G07630.1	lipid transporters
contig47168	23.9683	16.1933	27.5431	25.8354	0.214318				GO:0005515	AT5G24650.1	Mitochondrial import inner membrane translocase subunit Tim17/Tim22/Tim23 family protein
contig79132	3.24217	3.33665	3.27997	2.63833	0.104435				GO:0008152	AT4G38370.1	Phosphoglycerate mutase family protein
contig16218	7.24564	8.76153	7.40876	5.51722	0.183953				GO:0016020	AT1G12760.1	Zinc finger C3HC4 type (RING finger) family protein
contig5559	5.81889	4.7799	4.16929	4.27865	0.158195
contig54142	4.46578	3.38911	4.75277	3.08983	0.206089				GO:0005634	AT2G36740.1	sequence-specific DNA binding transcription factors;DNA binding;DNA binding
contig31599	4.74853	4.24509	4.36034	3.67974	0.103755					AT5G26760.2	unknown protein; CONTAINS InterPro DOMAIN/s: Protein of unknown function DUF408 (InterPro:IPR007308); Has 35333 Blast hits to 34131 proteins in 2444 species: Archae - 798; Bacteria - 22429; Metazoa - 974; Fungi - 991; Plants - 531; Viruses - 0; Other Eukaryotes - 9610 (source: NCBI BLink).
contig33411	7.8196	7.42138	8.92618	6.8859	0.111361				GO:0016020	AT1G04940.1	translocon at the inner envelope membrane of chloroplasts 20
contig7312	9.0279	7.52852	9.77764	7.088	0.150834				GO:0009058	AT2G45440.1	dihydrodipicolinate synthase
contig14885	16.8955	12.1327	13.2632	12.4642	0.159966				GO:0008152	AT4G04570.1	cysteine-rich RLK (RECEPTOR-like protein kinase) 40
contig42068	2.22074	1.76726	2.16154	1.81498	0.117033
contig65936	0.720251	0.458784	0.673113	0.551447	0.197147
[truncated: 178,109 more rows]
