# Supplementary material for: Molecular Responses to Cadmium Exposure in Two Contrasting Durum Wheat Genotypes
Source: Int J Mol Sci. 2021 Jul 8;22(14):7343. doi: 10.3390/ijms22147343 (PMC8306872; doi:10.3390/ijms22147343)
Supplement: Supplementary file 1 [file ijms-22-07343-s001.zip › Table S2_More expressed in L-Cd CTRL.xlsx]

## Sheet: Foglio1
Contig_id	L_root_CTRL	L_root_CD	H_root_CTRL	H_root_CD	CRTL root L Vs H	Feature ID	GO	AGI CODE
contig10131	32.2154	14.842	1.57258	0.0484076	DOWN	contig10131
contig10166	171.536	107.299	80.3869	98.1851	DOWN	contig10166	helicase-like protein
contig105162	39.2777	16.0897	8.78978	34.1845	DOWN	contig105162
contig10800	19.2848	6.92622	7.85069	16.6734	DOWN	contig10800
contig10922	16.1664	9.55643	5.33021	7.50068	DOWN	contig10922
contig109336	22.5728	39.2701	8.37478	19.5404	DOWN	contig109336
contig11356	28.1638	16.5534	12.7936	16.1198	DOWN	contig11356
contig11760	36.3618	26.2181	17.9345	49.9753	DOWN	contig11760
contig11821	1367.88	967.556	677.439	552.203	DOWN	contig11821
contig1233	22.3084	11.5926	11.0543	18.3574	DOWN	contig1233	eukaryotic peptide chain release factor subunit 1-1	AT3G23340.1
contig126544	23.5566	23.7095	9.96489	9.92624	DOWN	contig126544		AT4G20380.8
contig13259	112.444	86.9752	52.7567	22.1686	DOWN	contig13259	peroxidase 12-like	AT1G71695.1
contig13262	21.5208	17.4133	7.98984	8.74941	DOWN	contig13262	two-component response regulator-like aprr1-like	AT5G61380.1
contig132964	27.9304	16.1807	13.1917	18.1307	DOWN	contig132964
contig13436	22.1413	12.1784	10.5859	18.1484	DOWN	contig13436
contig13617	16.362	8.39344	6.41631	12.7708	DOWN	contig13617
contig136674	15.822	11.6874	4.7937	4.59695	DOWN	contig136674		AT5G65420.3
contig14073	18.3795	9.86978	6.35281	12.2472	DOWN	contig14073
contig14237	28.5325	8.34158	10.1382	43.5085	DOWN	contig14237	protein iq-domain 14-like
contig14250	33.8647	20.2746	6.44495	11.5924	DOWN	contig14250	l-ascorbate peroxidase	AT4G35000.1
contig14287	17.6964	16.4598	0.34078	0.25244	DOWN	contig14287	Os07g0646300 [Oryza sativa Japonica Group]
contig146334	34.0955	23.1165	8.90656	9.91093	DOWN	contig146334	ap-2 complex subunit mu-like	AT5G46630.2
contig148954	22.7087	5.56553	8.88263	1.15885	DOWN	contig148954
contig155836	32.9243	69.6029	14.409	45.4312	DOWN	contig155836
contig15702	19.037	10.858	9.02489	19.1472	DOWN	contig15702
contig157348	77.5903	38.2899	36.324	23.6318	DOWN	contig157348	major facilitator superfamily with spx domain-containing protein	AT4G11810.1
contig158772	38.51	22.6642	19.0936	23.7217	DOWN	contig158772
contig16030	193.828	107.907	88.9992	266.452	DOWN	contig16030
contig16165	109.338	51.702	46.3697	81.2924	DOWN	contig16165
contig162781	18.3797	9.2193	8.74784	16.9483	DOWN	contig162781	phytosulfokine receptor 1-like	AT2G02220.1
contig163306	43.4432	31.0277	10.8673	12.3111	DOWN	contig163306
contig16419	22.7101	11.853	8.5344	26.8934	DOWN	contig16419
contig16553	259.503	137.967	100.938	197.91	DOWN	contig16553
contig166114	18.869	27.9768	1.1038	0.164188	DOWN	contig166114
contig166396	18.8033	9.45432	7.37704	16.704	DOWN	contig166396
contig166978	102.481	56.176	45.6772	15.0709	DOWN	contig166978	pvr3-like protein precursor	AT5G48485.1
contig167244	31.391	22.733	12.2261	8.005	DOWN	contig167244	myb-like transcription factor divaricata	AT4G39250.1
contig167296	26.4974	24.788	9.72098	8.59695	DOWN	contig167296
contig169137	27.5181	17.5436	12.076	18.7384	DOWN	contig169137	dna-binding protein escarola-like	AT4G14465.1
contig17075	20.802	12.1974	9.4197	19.0073	DOWN	contig17075	loc100284911 precursor	AT1G29080.1
contig17238	27.099	24.3868	11.4413	5.47888	DOWN	contig17238		AT5G45410.1
contig177	28.4922	17.8645	14.2014	19.8891	DOWN	contig177
contig18227	17.8593	10.8046	7.14781	14.3194	DOWN	contig18227
contig18353	87.8302	49.6135	41.4091	61.4189	DOWN	contig18353
contig19404	36.3571	9.60283	12.9373	22.276	DOWN	contig19404
contig19456	40.4478	48.4176	20.0848	11.5117	DOWN	contig19456	hypersensitive-induced response protein	AT5G62740.1
contig19472	372.383	362.867	132.495	84.0636	DOWN	contig19472	late embryogenesis abundant protein lea14-a-like	AT2G46140.1
contig19712	27.3926	31.2108	2.38031	2.074	DOWN	contig19712		AT3G66654.1
contig20260	21.5054	15.4235	9.7139	10.673	DOWN	contig20260
contig20855	24.2082	23.8738	9.49665	19.9091	DOWN	contig20855	aspartic proteinase nepenthesin-1-like	AT5G10770.1
contig20893	20.1863	20.5679	10.0236	7.41536	DOWN	contig20893	polyol transporter 5-like	AT3G18830.1
contig21014	134.302	98.2691	8.37362	13.8645	DOWN	contig21014	malate dehydrogenase mitochondrial-like	AT1G53240.1
contig21155	21.8972	14.4788	8.47921	10.1794	DOWN	contig21155
contig21193	19.3966	20.3023	8.58079	6.02816	DOWN	contig21193	probable nucleolar protein 5-2-like	AT3G05060.1
contig21317	44.0279	16.7348	17.938	37.491	DOWN	contig21317
contig21476	25.996	10.9528	8.95178	13.5032	DOWN	contig21476
contig21514	46.6287	21.7361	22.9292	39.0525	DOWN	contig21514
contig21551	17.6371	10.6613	6.65322	10.0655	DOWN	contig21551	receptor-like serine threonine-protein kinase ale2-like	AT5G56890.1
contig21612	35.1419	17.296	12.1212	36.5547	DOWN	contig21612
contig21613	18.4025	5.35769	9.19635	5.58809	DOWN	contig21613	hydrolase protein serine threonine phosphatase	AT4G23000.1
contig21766	26.9173	14.4147	12.5522	10.6888	DOWN	contig21766	phosphoenolpyruvate phosphate translocator chloroplastic-like	AT5G33320.1
contig21767	19.1117	11.2136	8.81735	6.8076	DOWN	contig21767	phosphoenolpyruvate phosphate translocator chloroplastic-like	AT5G33320.1
contig22086	18.6614	12.8857	5.7051	4.01203	DOWN	contig22086
contig22189	18.9182	7.93302	7.09736	12.6203	DOWN	contig22189
contig22261	124.498	107.349	60.0099	89.1465	DOWN	contig22261	stem 28 kda glyco
contig2233	71.1106	86.8585	14.6325	9.63234	DOWN	contig2233	protein	AT4G27960.2
contig22368	20.8874	13.8877	8.83489	21.3008	DOWN	contig22368
contig2246	41.9742	30.9252	7.00548	6.03217	DOWN	contig2246	fk506-binding protein 2-1 precursor	AT3G25220.1
contig22612	16.6253	13.9024	7.5554	11.5961	DOWN	contig22612
contig22693	21.2247	20.2574	8.73435	10.5914	DOWN	contig22693	protein rer1b	AT2G21600.1
contig22746	102.632	58.7375	46.5233	96.6829	DOWN	contig22746
contig22747	21.7724	9.31112	10.5008	14.4003	DOWN	contig22747
contig22854	19.8546	14.5286	8.48214	8.1471	DOWN	contig22854	homoserine kinase	AT2G17265.1
contig22935	15.4078	7.66641	7.04577	15.1281	DOWN	contig22935
contig23038	62.4706	33.9453	24.458	19.4903	DOWN	contig23038		AT5G42510.1
contig23421	32.6528	19.739	15.9231	24.5632	DOWN	contig23421
contig23490	23.9688	16.3188	4.55995	6.95277	DOWN	contig23490	probable aldehyde oxidase 2-like	AT3G43600.1
contig23694	47.3006	27.7747	19.9079	33.5557	DOWN	contig23694
contig23750	43.4029	21.671	18.1215	25.0291	DOWN	contig23750	callose synthase	AT2G31960.1
contig2376	40.4637	20.3503	11.4212	37.4102	DOWN	contig2376
contig23952	25.3522	10.3579	12.1249	29.9633	DOWN	contig23952
contig2397	17.2352	8.91788	7.93725	19.7364	DOWN	contig2397	serine threonine-protein kinase ctr1-like	AT1G08720.1
contig24043	16.7718	9.91018	5.23813	15.7956	DOWN	contig24043
contig24055	39.1694	20.9586	16.3019	36.5676	DOWN	contig24055
contig2415	22.547	8.95155	6.98656	17.0752	DOWN	contig2415	callose synthase	AT3G14570.1
contig24164	37.6116	30.2226	16.2927	27.2916	DOWN	contig24164
contig24186	57.3716	45.712	25.2406	62.608	DOWN	contig24186
contig24187	67.2259	50.9051	23.6695	63.6642	DOWN	contig24187	auxin-induced protein 10a5	AT4G00880.1
contig24340	71.4921	13.3049	30.151	15.8376	DOWN	contig24340	kda heat shock mitochondrial	AT5G51440.1
contig24501	17.21	10.8983	8.42991	15.0133	DOWN	contig24501
contig25117	20.989	19.155	10.3959	20.2522	DOWN	contig25117
contig25180	19.6458	9.85238	9.43218	13.6183	DOWN	contig25180	allyl alcohol dehydrogenase-like protein	AT3G59840.1
contig25322	21.3312	19.7624	7.17293	4.28572	DOWN	contig25322
contig25968	62.8547	33.0303	29.7735	60.411	DOWN	contig25968	PREDICTED: uncharacterized protein LOC100823109 [Brachypodium distachyon]	AT3G57785.1
contig26041	27.1442	19.509	6.79106	11.6029	DOWN	contig26041	two-component response regulator-like aprr1-like	AT2G46670.1
contig26069	75.7442	29.2791	35.1691	65.6589	DOWN	contig26069
contig26337	24.2651	7.96799	11.5387	17.5636	DOWN	contig26337	hiv tat-specific factor 1 homolog	AT5G16260.1
contig26723	73.2058	52.65	36.4405	42.4713	DOWN	contig26723
contig26752	19.5758	10.171	9.23596	14.7555	DOWN	contig26752
contig27175	77.4884	44.5367	32.7897	19.3335	DOWN	contig27175	5 -adenylylsulfate reductase chloroplastic-like	AT4G04610.1
contig2724	17.7687	8.52139	6.82316	13.3479	DOWN	contig2724
contig27241	24.7011	10.74	12.0311	24.502	DOWN	contig27241	Os01g0738000 [Oryza sativa Japonica Group]	AT4G39300.1
contig27368	19.6112	33.4569	8.11182	5.65714	DOWN	contig27368	phenylalanine ammonia-lyase-like	AT2G37040.1
contig27384	18.0496	12.417	7.38993	12.0973	DOWN	contig27384
contig28155	18.5568	8.01452	7.35932	17.2697	DOWN	contig28155
contig28302	20.5316	15.6249	8.60954	12.3807	DOWN	contig28302	calcium-binding protein pbp1	AT2G46600.1
contig28317	35.9239	16.2253	8.62655	18.3872	DOWN	contig28317	coatomer subunit beta -2-like	AT1G79990.1
contig28592	17.9976	9.24469	8.74594	12.1052	DOWN	contig28592
contig28750	56.8357	26.0261	25.2714	54.7912	DOWN	contig28750
contig29189	23.8499	13.0969	11.7739	5.23621	DOWN	contig29189	u-box domain-containing protein 33-like	AT2G45910.1
contig29382	18.4362	10.5403	7.72717	18.6216	DOWN	contig29382		AT1G53510.1
contig29446	64.9489	38.2395	27.2779	73.9998	DOWN	contig29446
contig29575	27.6567	13.5495	13.6356	29.3048	DOWN	contig29575		AT2G21790.1
contig29629	20.7746	12.1941	4.41077	7.6006	DOWN	contig29629
contig29665	120.426	217.222	50.3063	131.375	DOWN	contig29665
contig29901	71.4656	32.0764	32.7726	65.8625	DOWN	contig29901	rapid alkalinization factor 1 precursor	AT4G15800.1
contig30001	126.317	43.9929	58.0815	100.225	DOWN	contig30001
contig30031	19.9497	9.23174	9.97127	9.66517	DOWN	contig30031
contig30309	21.1968	25.8787	7.38296	2.23376	DOWN	contig30309		AT4G03030.1
contig30483	16.7484	13.8187	6.03034	8.71377	DOWN	contig30483	isoaspartyl peptidase l-asparaginase 1 subunit beta	AT5G08100.1
contig30983	16.2918	7.77147	7.73028	2.87451	DOWN	contig30983	kda class i heat shock protein 1	AT1G07400.1
contig31081	80.4499	55.2222	27.7991	79.6451	DOWN	contig31081
contig31189	74.0198	61.8706	26.3884	20.1174	DOWN	contig31189	60s ribosomal protein l9	AT1G33140.1
contig31622	23.6338	11.8505	11.1961	23.9349	DOWN	contig31622	PREDICTED: uncharacterized protein LOC100834363 [Brachypodium distachyon]	AT1G45170.1
contig31864	16.8266	6.75704	7.29381	17.2003	DOWN	contig31864
contig3190	77.6395	32.3322	24.3716	63.4119	DOWN	contig3190		AT5G60390.1
contig31942	65.4655	20.4067	25.7125	51.6681	DOWN	contig31942
contig32213	28.2826	12.3689	12.4726	28.6088	DOWN	contig32213
contig3222	66.7542	32.6281	27.7337	74.993	DOWN	contig3222
contig32560	39.1223	13.5849	10.776	23.935	DOWN	contig32560
contig32747	21.5799	9.40029	9.5373	14.0767	DOWN	contig32747	prostaglandin g h synthase 2-like	AT3G01420.1
contig32778	18.4234	8.22504	8.30105	20.7086	DOWN	contig32778
contig32922	47.8058	27.3443	22.8092	31.9078	DOWN	contig32922
contig33123	28.0883	14.3734	12.7469	24.2434	DOWN	contig33123
contig33206	37.0306	42.0437	17.2988	24.7815	DOWN	contig33206	ef hand family protein
contig33635	33.6761	21.7209	10.9826	12.7974	DOWN	contig33635		AT5G59410.1
contig33972	18.5371	7.64354	8.63822	23.8241	DOWN	contig33972	myosin 2	AT1G04160.1
contig34004	18.421	6.7843	8.51006	16.0029	DOWN	contig34004	auxin-induced in root cultures protein 12-like	AT3G07390.1
contig34065	21.319	12.7724	10.5595	16.3969	DOWN	contig34065
contig34066	20.0035	11.3293	6.77967	9.8181	DOWN	contig34066
contig34275	26.6571	11.7797	10.4072	29.9604	DOWN	contig34275
contig34878	21.9188	13.8647	9.63388	23.075	DOWN	contig34878	probable lrr receptor-like serine threonine-protein kinase at4g26540-like	AT5G56040.2
contig3504	27.2643	23.6772	13.5845	14.747	DOWN	contig3504	pantothenate kinase 2-like
contig35098	18.9759	12.2967	4.83964	7.27157	DOWN	contig35098
contig35153	16.719	8.96424	7.79863	10.0834	DOWN	contig35153
contig35205	18.5571	10.113	8.71087	8.94213	DOWN	contig35205	cysteine-rich receptor-like protein kinase 8-like	AT1G61390.1
contig35288	16.7633	12.5392	6.38859	8.59501	DOWN	contig35288
contig36051	47.7573	22.0599	19.6979	28.6327	DOWN	contig36051	histone-lysine n-methyltransferase ez2	AT4G02020.1
contig36167	31.4514	11.7198	9.41122	37.9352	DOWN	contig36167
contig36246	34.1381	20.0806	16.5845	31.727	DOWN	contig36246
contig36476	18.604	11.7248	6.08125	18.2466	DOWN	contig36476	coatomer subunit beta -2-like	AT1G79990.1
contig3678	61.017	30.5129	25.7575	41.887	DOWN	contig3678		AT1G80490.2
contig36841	17.3983	10.1806	7.55507	23.0344	DOWN	contig36841
contig37648	33.5283	16.5157	15.4007	21.467	DOWN	contig37648
contig3787	353.305	181.743	118.222	258.171	DOWN	contig3787
contig3828	702.197	422.1	316.931	481.028	DOWN	contig3828
contig38403	33.9799	19.0453	15.7975	29.4711	DOWN	contig38403		AT1G19660.1
contig386	16.2886	16.132	7.15713	17.3011	DOWN	contig386		AT2G37040.1
contig38623	26.746	14.1014	10.398	21.8291	DOWN	contig38623
contig38718	23.1154	16.0395	9.65999	27.8778	DOWN	contig38718	lipid transfer-like protein vas-like	AT1G62790.1
contig38865	16.3917	7.7586	6.72863	24.5122	DOWN	contig38865
contig38924	20.7531	12.9	9.91512	20.3482	DOWN	contig38924
contig3982	19.8307	20.102	9.17702	9.55837	DOWN	contig3982	polcalcin jun o 2	AT1G24620.1
contig40135	17.2679	8.37031	8.50274	14.6155	DOWN	contig40135	PREDICTED: uncharacterized protein LOC100840929 [Brachypodium distachyon]
contig40462	66.342	35.4768	26.6116	68.7669	DOWN	contig40462	rapid alkalinization factor 1 precursor	AT4G15800.1
contig4048	15.4135	7.60359	6.30264	11.5233	DOWN	contig4048	probable ion channel castor-like	AT5G43745.1
contig40583	78.728	78.3626	23.3118	32.3518	DOWN	contig40583	pollen ole e 1 allergen and extensin family protein	AT3G16660.1
contig41166	16.0063	9.0121	4.86481	11.6498	DOWN	contig41166
contig41703	19.761	6.82864	6.85986	21.4413	DOWN	contig41703
contig41879	15.772	7.39659	7.07142	9.26578	DOWN	contig41879	phosphatidate phosphatase lpin2-like	AT5G42870.1
contig41961	17.3771	11.561	8.59073	9.08485	DOWN	contig41961
contig42124	30.6932	15.4749	13.6847	23.4343	DOWN	contig42124
contig42183	37.994	33.0418	11.8048	19.8116	DOWN	contig42183
contig42444	180.357	101.68	74.2762	54.0583	DOWN	contig42444	5 -adenylylsulfate reductase chloroplastic-like	AT4G04610.1
contig42807	18.8022	21.4106	4.19333	3.23372	DOWN	contig42807	phenylalanine ammonia-lyase-like	AT3G53260.1
contig43064	115.383	50.0958	33.8607	31.6617	DOWN	contig43064	5 -adenylylsulfate reductase 2	AT1G62180.1
contig4358	15.0215	7.39764	5.82827	13.8935	DOWN	contig4358
contig44229	67.8662	37.6814	19.5804	22.8609	DOWN	contig44229	5 -adenylylsulfate reductase 2	AT1G62180.1
contig44243	16.522	10.6111	7.81755	12.5548	DOWN	contig44243	purple acid phosphatase 2-like	AT2G16430.2
contig45131	22.9607	17.5396	8.79105	25.4607	DOWN	contig45131		AT1G52150.2
contig45651	16.7664	5.62298	3.51054	10.9393	DOWN	contig45651		AT5G13100.1
contig45881	73.6822	65.0184	35.2526	22.2927	DOWN	contig45881	bowman-birk type trypsin inhibitor-like
contig46254	22.6471	23.8908	11	10.5677	DOWN	contig46254
contig46581	36.9002	18.0203	16.7517	26.3436	DOWN	contig46581	histone-lysine n-methyltransferase ez2	AT4G02020.1
contig46605	74.6016	33.9901	28.0618	9.90443	DOWN	contig46605
contig46873	39.4984	16.0635	10.1581	42.8375	DOWN	contig46873
contig47313	43.6619	18.8698	12.6807	7.9618	DOWN	contig47313		AT1G62180.1
contig47489	61.4965	19.9006	11.9751	61.7375	DOWN	contig47489	adrenodoxin-like mitochondrial-like	AT3G07480.1
contig48269	78.0905	37.5527	36.8926	46.1412	DOWN	contig48269
contig48874	23.7112	7.59893	9.95356	15.5387	DOWN	contig48874
contig48911	18.5231	10.5534	7.73582	7.26108	DOWN	contig48911	65-kda microtubule-associated protein 6-like	AT5G55230.2
contig4907	34.7593	18.2007	9.25982	13.1472	DOWN	contig4907
contig49441	22.6104	13.6482	5.68406	6.30958	DOWN	contig49441
contig49442	27.9829	17.2432	8.43465	8.22614	DOWN	contig49442
contig49755	31.0781	7.82731	7.61981	3.06929	DOWN	contig49755	auxin-induced protein 5ng4-like
contig49862	162.249	345.034	70.5445	43.212	DOWN	contig49862
contig4988	27.469	20.5725	12.3366	23.2428	DOWN	contig4988		AT3G22600.1
contig49895	47.4245	39.8247	17.2605	15.6451	DOWN	contig49895
contig50227	35.8988	22.7488	17.5923	24.5888	DOWN	contig50227
contig50582	23.0051	13.9111	5.49804	4.01849	DOWN	contig50582	chaperone protein dnaj mitochondrial-like	AT5G48030.1
contig50644	16.8358	12.6974	7.44616	21.385	DOWN	contig50644
contig5115	92.1783	46.2038	35.8854	68.8906	DOWN	contig5115	amidase -like	AT4G34880.1
contig5119	94.0122	154.209	31.6362	12.8725	DOWN	contig5119	germin-like protein 8-4-like	AT5G39150.1
contig51359	25.3608	16.6071	9.89725	26.1304	DOWN	contig51359
contig51926	28.3569	9.93217	13.6991	26.9777	DOWN	contig51926	transmembrane clptm1 family protein	AT5G08500.1
contig51937	21.9932	12.2067	10.0216	20.0553	DOWN	contig51937
contig51986	23.0742	20.801	10.6143	12.3161	DOWN	contig51986
contig52229	18.1976	9.23075	8.72952	14.9515	DOWN	contig52229
contig53163	25.7743	21.329	9.30072	17.3394	DOWN	contig53163	chitinase 10-like	AT1G02360.1
contig53333	29.1502	13.4551	14.3799	28.5639	DOWN	contig53333	chd3-type chromatin-remodeling factor pickle-like
contig53524	21.9558	8.86791	10.4265	11.3886	DOWN	contig53524
contig53679	44.5029	22.4085	20.2352	45.4435	DOWN	contig53679
contig53725	39.0591	26.3506	12.6282	33.3621	DOWN	contig53725	coatomer subunit beta -2-like	AT1G52360.2
contig53819	27.8201	15.7369	13.2616	18.902	DOWN	contig53819
contig53998	26.2719	22.3811	12.9411	9.57628	DOWN	contig53998	5 -adenylylsulfate reductase chloroplastic-like	AT4G04610.1
contig54460	16.7685	10.1442	7.01505	19.1262	DOWN	contig54460
contig54856	18.5294	16.4878	8.28635	13.1025	DOWN	contig54856	chitinase 10-like	AT1G02360.1
contig5543	16.0867	9.51522	1.15775	0.0406884	DOWN	contig5543
contig55598	25.2099	14.5626	11.1573	13.3284	DOWN	contig55598		AT1G73320.1
contig56045	16.4082	11.2969	6.95547	2.41704	DOWN	contig56045	male sterility ms5 family protein	AT1G04770.1
contig5668	311.605	272.007	102.279	86.0338	DOWN	contig5668	mitochondrial atp synthase subunit	AT5G59613.1
contig56933	26.9296	19.7093	12.509	24.4061	DOWN	contig56933
contig56982	25.7639	24.1407	7.26458	10.764	DOWN	contig56982	probable salt tolerance-like protein at1g75540-like
contig57021	17.3701	7.65102	6.55045	19.8741	DOWN	contig57021
contig57351	64.7206	24.0645	23.9458	72.8926	DOWN	contig57351
contig57480	22.9197	10.0317	9.64489	14.2509	DOWN	contig57480
contig5761	36.4166	25.7366	4.87577	4.00214	DOWN	contig5761	3-mercaptopyruvate sulfurtransferase-like	AT1G79230.1
contig57629	19.0856	8.19404	6.44818	14.9258	DOWN	contig57629
contig57752	16.8472	8.91936	7.82393	10.5478	DOWN	contig57752
contig58058	18.3194	6.60184	7.71986	17.5171	DOWN	contig58058
contig58465	27.8182	12.9862	11.5968	27.6762	DOWN	contig58465
contig58580	26.095	13.5378	12.7256	19.2233	DOWN	contig58580
contig59395	17.2977	8.18528	2.4603	5.85289	DOWN	contig59395	PREDICTED: uncharacterized protein LOC100838750 [Brachypodium distachyon]	AT4G28310.1
contig60883	17.2881	9.47492	6.79946	18.4108	DOWN	contig60883
contig61318	29.4814	12.993	8.47858	36.361	DOWN	contig61318
contig61741	48.6351	49.7209	23.2846	27.8615	DOWN	contig61741
contig61796	15.9939	7.31758	4.23445	5.914	DOWN	contig61796	bromodomain protein	AT1G20670.1
contig61807	18.193	11.0957	8.1597	7.20633	DOWN	contig61807	basic 7s globulin-like	AT1G03230.1
contig61842	25.754	17.2933	12.2213	15.8658	DOWN	contig61842	hypothetical protein SORBIDRAFT_01g033610 [Sorghum bicolor]
contig62796	25.0988	11.1436	10.8036	22.5429	DOWN	contig62796
contig62990	22.51	19.7837	8.43853	12.7145	DOWN	contig62990	polcalcin jun o 2	AT5G37770.1
contig64201	24.0321	12.7745	10.8494	18.2183	DOWN	contig64201
contig64687	22.8836	11.8783	10.3955	15.7227	DOWN	contig64687
contig64980	28.2868	20.061	4.14364	5.61745	DOWN	contig64980
contig65103	19.1431	4.28169	5.46152	20.3523	DOWN	contig65103		AT4G39300.1
contig65329	23.0304	16.2924	11.1537	18.3058	DOWN	contig65329
contig65667	25.0004	20.106	11.9754	21.1938	DOWN	contig65667
contig67104	49.0881	28.1376	23.8234	29.3167	DOWN	contig67104
contig68158	15.2479	7.24256	6.98133	17.4264	DOWN	contig68158
contig68204	43.1402	57.4301	17.7475	23.8233	DOWN	contig68204	aquaporin nip2-1-like	AT4G18910.1
contig68718	16.7567	16.4063	5.18243	4.99433	DOWN	contig68718
contig68768	16.5084	8.23785	8.21925	10.9695	DOWN	contig68768	glucose-6-phosphate 1- cytoplasmic isoform-like	AT5G40760.1
contig68906	27.4199	13.6711	13.4855	18.5759	DOWN	contig68906		AT1G60830.1
contig70585	16.9136	9.41352	7.44568	16.8295	DOWN	contig70585
contig70926	26.6651	17.0356	12.4874	23.4536	DOWN	contig70926	probable calcium-binding protein cml29-like	AT1G73630.1
contig71577	18.0612	12.408	8.70843	15.3934	DOWN	contig71577
contig7195	18.6196	21.4859	8.76051	5.25197	DOWN	contig7195	ferrochelatase- chloroplastic-like	AT2G30390.2
contig72264	27.2964	22.6427	11.897	20.5335	DOWN	contig72264
contig72772	23.2313	8.22161	8.09853	15.5676	DOWN	contig72772
contig73000	16.684	8.72101	0.479009	0.942109	DOWN	contig73000	PREDICTED: uncharacterized protein LOC100838750 [Brachypodium distachyon]	AT4G28310.1
contig74679	37.3455	38.9277	18.2728	33.0939	DOWN	contig74679
contig7489	28.0012	19.8624	13.2606	13.6935	DOWN	contig7489	two-component response regulator-like aprr1-like	AT5G61380.1
contig75692	18.9566	11.7373	9.30604	20.0788	DOWN	contig75692	cysteine-rich receptor-like protein kinase 25-like
contig75820	24.974	11.5966	9.41207	24.6691	DOWN	contig75820
contig7594	184.407	141.519	51.7589	54.7498	DOWN	contig7594	PREDICTED: uncharacterized protein LOC100831833 [Brachypodium distachyon]
contig78515	33.8314	19.2439	15.5432	27.7088	DOWN	contig78515
contig79541	20.5737	30.48	8.93229	5.59697	DOWN	contig79541	zinc finger protein constans-like 9-like	AT5G48250.1
contig79554	19.3515	6.94772	6.69335	16.6056	DOWN	contig79554
contig7981	21.5797	10.3396	9.00383	13.4923	DOWN	contig7981	gtp-binding protein homolog	AT5G13650.2
contig7982	17.4701	6.84605	5.16717	13.5236	DOWN	contig7982
contig80907	27.6406	21.4343	3.18682	4.86479	DOWN	contig80907	bowman-birk type trypsin inhibitor-like
contig81376	28.0237	14.1902	6.57254	27.5927	DOWN	contig81376
contig81618	27.5336	20.264	12.466	30.7147	DOWN	contig81618	probable glucuronosyltransferase os01g0926400-like	AT5G61840.1
contig8383	21.1526	11.75	9.70393	4.76882	DOWN	contig8383	PREDICTED: uncharacterized protein LOC100831783 [Brachypodium distachyon]	AT4G31330.1
contig845	18.2914	8.57605	7.49893	8.03112	DOWN	contig845
contig8512	27.6472	16.3059	11.5975	11.2641	DOWN	contig8512
contig85447	43.6718	13.6849	21.4296	5.65844	DOWN	contig85447
contig87844	17.3741	16.6034	7.60663	8.00894	DOWN	contig87844
contig8841	44.5094	59.8419	17.9688	8.20796	DOWN	contig8841	xylem cysteine proteinase 2-like	AT4G35350.1
contig8914	128.21	106.177	61.4541	44.5683	DOWN	contig8914	PREDICTED: uncharacterized protein LOC100841111 [Brachypodium distachyon]
contig89370	18.139	11.6063	8.27998	15.9304	DOWN	contig89370
contig93301	15.6265	9.58057	7.66234	14.6493	DOWN	contig93301
contig93535	21.9285	11.9173	9.83142	18.3473	DOWN	contig93535
contig94069	20.146	9.736	7.35546	7.9397	DOWN	contig94069
contig9490	53.1994	33.9094	2.84243	0.233972	DOWN	contig9490	abc transporter f family member 3-like	AT1G64550.1
contig95408	16.3332	7.61863	4.94289	7.81792	DOWN	contig95408
contig96575	48.7469	20.7584	18.9792	49.2505	DOWN	contig96575
contig9670	18.1983	9.55326	8.63249	17.2016	DOWN	contig9670
contig96918	18.6395	8.93471	8.66443	9.11955	DOWN	contig96918
contig97692	26.0818	4.93953	10.2129	1.62656	DOWN	contig97692	inorganic pyrophosphatase 1-like isoform 1	AT1G17710.1
contig98014	17.3415	8.06229	7.65161	14.653	DOWN	contig98014
contig9841	15.2115	8.62403	7.56223	10.46	DOWN	contig9841		AT4G28310.1
