# Supplementary material for: Molecular Responses to Cadmium Exposure in Two Contrasting Durum Wheat Genotypes
Source: Int J Mol Sci. 2021 Jul 8;22(14):7343. doi: 10.3390/ijms22147343 (PMC8306872; doi:10.3390/ijms22147343)
Supplement: Supplementary file 1 [file ijms-22-07343-s001.zip › Table S3_More expressed in H-Cd CTRL.xlsx]

## Sheet: Foglio1
gene_id	L_root_CTRL	L_root_CD	H_root_CTRL	H_root_CD	CRTL root L Vs H	GO	AGI CODE
contig3675	0.357001	0.389754	104.091	84.4372	UP
contig12529	0.127988	0.126152	16.0859	9.51077	UP
contig155446	0.704032	8.02346	71.4784	8.54285	UP	AT5G39890.1	Protein of unknown function (DUF1637)
contig46433	1.18921	12.429	96.8591	11.0816	UP	AT3G62550.1	Adenine nucleotide alpha hydrolases-like superfamily protein
contig75576	1.13115	5.53555	79.623	7.58446	UP	AT1G21270.1	wall-associated kinase 2
contig126163	0.394786	1.04275	24.0138	3.08257	UP	AT1G33055.1	unknown protein; FUNCTIONS IN: molecular_function unknown; INVOLVED IN: anaerobic respiration; LOCATED IN: endomembrane system; EXPRESSED IN: 13 plant structures; EXPRESSED DURING: 6 growth stages; Has 20 Blast hits to 20 proteins in 8 species: Archae - 0; Bacteria - 0; Metazoa - 0; Fungi - 0; Plants - 20; Viruses - 0; Other Eukaryotes - 0 (source: NCBI BLink).
contig16978	0.335246	0.147506	20.2681	25.0222	UP	AT5G11110.1	sucrose phosphate synthase 2F
contig155078	0.446721	0.681996	26.6108	1.16795	UP	AT3G25270.1	Ribonuclease H-like superfamily protein
contig52285	1.93873	9.27579	112.788	15.3555	UP	AT1G21210.1	wall associated kinase 4
contig71248	2.08748	7.41933	100.12	21.9217	UP
contig69882	0.614349	3.78389	26.7466	2.06372	UP
contig17450	0.792417	0.295032	33.1046	24.7115	UP	AT1G71695.1	Peroxidase superfamily protein
contig38106	0.461235	5.31691	18.9747	4.9072	UP	AT5G25940.1	early nodulin-related
contig75310	1.98646	7.0468	77.1268	10.8666	UP	AT2G47710.1	Adenine nucleotide alpha hydrolases-like superfamily protein
contig41537	2.75993	2.1895	104.913	13.3452	UP	AT4G10270.1	Wound-responsive family protein
contig100477	2.62884	16.5716	99.0861	5.80405	UP	AT3G29970.1	B12D protein
contig34834	2.3914	8.09845	88.5518	14.6411	UP	AT2G47710.1	Adenine nucleotide alpha hydrolases-like superfamily protein
contig61440	2.08283	5.16786	76.9088	14.6847	UP
contig71247	3.61503	11.8194	126.445	36.567	UP
contig156659	0.963892	2.7489	33.5739	4.66444	UP
contig24852	0.692283	246.855	23.7584	103.023	UP	AT2G20610.1	Tyrosine transaminase family protein
contig33251	2.81752	12.9609	92.1239	13.5721	UP
contig145171	0.830485	0.5294	26.866	0.669786	UP	AT1G68510.1	LOB domain-containing protein 42
contig85438	1.77691	5.46116	53.5961	3.60828	UP	AT4G38260.1	Protein of unknown function (DUF833)
contig58652	2.58213	6.23823	75.0075	19.6776	UP	AT4G10270.1	Wound-responsive family protein
contig145565	11.0149	51.5816	305.258	79.6334	UP	AT5G25940.1	early nodulin-related
contig37394	3.04068	1.65038	81.013	10.6467	UP	AT4G10265.1	Wound-responsive family protein
contig127072	3.13716	21.0376	80.9616	18.181	UP	AT5G25940.1	early nodulin-related
contig156008	2.20385	11.6045	56.6446	13.0258	UP	AT5G25940.1	early nodulin-related
contig29036	1.81088	8.07223	42.6324	6.76763	UP	AT5G51060.1	NADPH/respiratory burst oxidase protein D
contig75463	3.32627	12.3337	77.7765	20.4815	UP
contig97412	3.89362	5.16621	90.649	19.9385	UP
contig155767	2.11638	11.0521	48.7026	12.1279	UP	AT5G25940.1	early nodulin-related
contig33576	1.38763	6.2528	31.7864	6.6727	UP	AT1G09090.2	respiratory burst oxidase homolog B
contig130911	1.08441	1.21565	24.3321	5.40456	UP
contig65286	1.33106	2.31185	29.5589	6.87444	UP
contig155774	2.57868	17.7448	56.8984	16.4385	UP	AT5G25940.1	early nodulin-related
contig122193	2.06666	2.41115	45.5108	5.72629	UP	AT1G33055.1	unknown protein; FUNCTIONS IN: molecular_function unknown; INVOLVED IN: anaerobic respiration; LOCATED IN: endomembrane system; EXPRESSED IN: 13 plant structures; EXPRESSED DURING: 6 growth stages; Has 20 Blast hits to 20 proteins in 8 species: Archae - 0; Bacteria - 0; Metazoa - 0; Fungi - 0; Plants - 20; Viruses - 0; Other Eukaryotes - 0 (source: NCBI BLink).
contig25548	12.9746	99.1067	285.517	21.2975	UP	AT2G16060.1	hemoglobin 1
contig836	7.9835	6.09018	169.767	151.027	UP
contig11517	3.74657	12.6903	79.4094	150.555	UP	AT4G34840.1	Phosphorylase superfamily protein
contig31007	0.957414	0.625315	20.1244	16.912	UP	AT2G23570.1	methyl esterase 19
contig107416	1.08409	2.27693	22.3388	8.99889	UP	AT5G25940.1	early nodulin-related
contig51901	4.7092	7.27475	94.6469	21.2024	UP	AT5G39890.1	Protein of unknown function (DUF1637)
contig14487	1.86668	1.98625	37.2433	10.4989	UP	AT1G77120.1	alcohol dehydrogenase 1
contig36443	14.8146	49.349	289.807	49.3909	UP	AT5G25940.1	early nodulin-related
contig45349	1.64636	2.13063	31.8646	5.25227	UP	AT3G10040.1	sequence-specific DNA binding transcription factors
contig118389	5.88116	5.29756	112.187	24.4482	UP	AT4G10270.1	Wound-responsive family protein
contig24830	6.3433	5.0923	116.299	28.8145	UP	AT4G10270.1	Wound-responsive family protein
contig155715	1.68344	0.671809	30.8035	0.970049	UP
contig47467	1.05006	6.33496	18.8681	0.564126	UP	AT3G25730.1	ethylene response DNA binding factor 3
contig84005	4.28182	3.2348	76.9201	6.50553	UP	AT4G10270.1	Wound-responsive family protein
contig43722	18.5227	46.0854	331.802	95.0481	UP
contig53157	7.79735	16.026	138.79	28.1837	UP	AT5G39890.1	Protein of unknown function (DUF1637)
contig71213	4.24688	6.6175	75.2858	18.4895	UP	AT1G21200.1	sequence-specific DNA binding transcription factors
contig122857	9.2741	26.5412	163.577	44.8467	UP	AT5G25940.1	early nodulin-related
contig2839	1.88809	9.84551	33.2292	10.9048	UP	AT5G10530.1	Concanavalin A-like lectin protein kinase family protein
contig23417	1.19088	1.10871	20.7492	25.3414	UP	AT5G08100.1	N-terminal nucleophile aminohydrolases (Ntn hydrolases) superfamily protein
contig58422	7.20883	22.3815	122.899	25.2716	UP
contig137794	8.50449	17.2905	139.298	48.8463	UP	AT5G25940.1	early nodulin-related
contig141638	1.91665	7.41288	31.3299	16.5271	UP	AT5G25940.1	early nodulin-related
contig158566	1.15465	17.2956	18.866	8.35104	UP	AT4G02600.1	Seven transmembrane MLO family protein
contig67565	2.59942	3.28507	41.3455	4.14786	UP
contig167163	13.367	55.0791	209.532	5.92651	UP	AT5G43350.1	phosphate transporter 1;1
contig5342	3.33333	3.85334	52.1979	67.3857	UP	AT4G18930.1	RNA ligase/cyclic nucleotide phosphodiesterase family protein
contig61451	7.61023	4.90761	118.729	22.1683	UP	AT4G10270.1	Wound-responsive family protein
contig20039	3.18317	462.857	49.5632	287.94	UP	AT5G53970.1	Tyrosine transaminase family protein
contig55427	5.65741	15.0037	87.9998	21.5835	UP	AT5G47910.1	respiratory burst oxidase homologue D
contig156735	5.30434	13.2067	82.0518	18.0122	UP	AT5G07390.1	respiratory burst oxidase homolog A
contig6432	5.33921	1071.56	81.6418	218.63	UP	AT1G56430.1	nicotianamine synthase 4
contig59668	1.46792	4.78349	21.7973	9.13803	UP	AT2G47520.1	Integrase-type DNA-binding superfamily protein
contig3430	15.623	24.7903	226.984	63.111	UP	AT5G27760.1	Hypoxia-responsive family protein
contig109460	7.61811	8.78107	109.647	30.6733	UP
contig13016	2.10247	391.463	30.1899	114.6	UP	AT1G56430.1	nicotianamine synthase 4
contig73531	4.80036	3.65665	68.6719	11.329	UP
contig48835	4.43771	4.42195	62.9131	103.377	UP
contig138572	8.11697	8.27261	114.218	37.9349	UP
contig115324	6.4036	3.0141	89.136	21.1607	UP	AT4G10270.1	Wound-responsive family protein
contig69033	6.55835	3.40751	90.6506	11.1643	UP	AT4G10270.1	Wound-responsive family protein
contig128348	8.30596	6.94292	114.073	29.2469	UP	AT4G10270.1	Wound-responsive family protein
contig117489	1.44725	1.18014	19.7711	0.990618	UP	AT3G02550.1	LOB domain-containing protein 41
contig138679	14.7705	83.8367	201.623	32.2673	UP	AT5G39890.1	Protein of unknown function (DUF1637)
contig95081	19.7641	50.3581	267.369	78.2706	UP
contig141977	7.3726	22.6534	98.1115	28.1811	UP	AT3G02630.1	Plant stearoyl-acyl-carrier-protein desaturase family protein
contig56736	9.14853	5.80553	120.652	19.7529	UP	AT4G10265.1	Wound-responsive family protein
contig2557	4.43242	20.3599	57.0142	30.385	UP	AT4G37900.1	Protein of unknown function (duplicated DUF1399)
contig49357	1.99666	5.32134	25.4455	2.55317	UP	AT2G37460.1	nodulin MtN21 /EamA-like transporter family protein
contig30707	30.8356	192.526	384.499	52.4977	UP	AT2G16060.1	hemoglobin 1
contig156281	2.45489	5.53897	30.4718	3.24006	UP	AT5G25940.1	early nodulin-related
contig81981	2.92679	16.187	36.2904	3.64695	UP	AT1G12110.1	nitrate transporter 1.1
contig55476	7.84288	30.7509	96.5961	36.7355	UP	AT5G25940.1	early nodulin-related
contig155357	1.39312	2.78686	16.9026	1.84786	UP	AT2G28710.1	C2H2-type zinc finger family protein
contig25642	2.0542	1.87866	24.4514	19.3434	UP	AT5G01650.2	Tautomerase/MIF superfamily protein
contig19568	1.79031	4.98272	21.1149	7.80719	UP	AT1G70940.1	Auxin efflux carrier family protein
contig107112	2.33542	1.88438	27.5091	8.76549	UP
contig46311	3.12414	3.03509	36.6972	11.1301	UP	AT4G10270.1	Wound-responsive family protein
contig23370	2.55774	4.35311	30.0179	4.39319	UP	AT1G72360.2	Integrase-type DNA-binding superfamily protein
contig123724	6.94701	1.36528	79.8759	1.43846	UP	AT5G59720.1	heat shock protein 18.2
contig8559	1.88757	1.65941	21.6008	17.1671	UP
contig167550	14.8001	57.3511	168.605	6.14406	UP	AT2G32830.1	phosphate transporter 1;5
contig155750	11.036	58.0096	125.577	20.8618	UP	AT5G15120.1	Protein of unknown function (DUF1637)
contig92293	20.9242	55.3951	226.251	54.6897	UP	AT5G25940.1	early nodulin-related
contig81881	6.41594	13.7477	69.0124	10.6699	UP
contig4800	24.5375	177.3	262.986	12.3591	UP	AT1G77120.1	alcohol dehydrogenase 1
contig18348	2.36992	626.79	25.2364	257.918	UP	AT1G56430.1	nicotianamine synthase 4
contig34019	6.40121	15.2222	66.1413	18.9461	UP	AT5G58787.1	RING/U-box superfamily protein
contig40644	1.82814	3.67873	18.7105	0.530298	UP	AT5G17330.1	glutamate decarboxylase
contig49194	2.31813	2.57574	23.6782	2.56206	UP	AT5G47060.1	Protein of unknown function (DUF581)
contig37403	3.78284	8.19449	38.5316	11.7289	UP	AT1G32230.1	WWE protein-protein interaction domain protein family
contig1280	3.05152	1.92339	30.9352	32.5782	UP	AT1G32130.1	Transcription elongation factor (TFIIS) family protein
contig68404	5.93374	4.47355	59.0128	15.3218	UP	AT4G10270.1	Wound-responsive family protein
contig56926	4.04275	9.70776	39.8465	4.12597	UP	AT2G44310.1	Calcium-binding EF-hand family protein
contig38697	30.1732	77.6053	296.22	116.687	UP
contig27157	5.59173	11.0529	54.4541	10.1988	UP	AT1G72360.2	Integrase-type DNA-binding superfamily protein
contig77015	2.13904	2.46284	20.7415	5.77092	UP	AT3G10040.1	sequence-specific DNA binding transcription factors
contig150202	13.3127	0.916748	128.601	5.53526	UP
contig167322	2.47771	7.37978	23.8424	2.05687	UP
contig49517	12.9442	44.1149	123.372	24.9803	UP
contig72829	8.94861	8.07406	84.0892	15.9664	UP	AT4G10270.1	Wound-responsive family protein
contig18891	3.22966	4.67553	30.1048	9.94634	UP	AT2G30490.1	cinnamate-4-hydroxylase
contig72129	4.30113	2.97326	39.9307	2.22682	UP	AT5G25280.1	serine-rich protein-related
contig44671	5.39156	774.155	49.4296	437.232	UP
contig30379	6.03573	19.7031	54.6601	3.08125	UP	AT4G10520.1	Subtilase family protein
contig169382	2.69741	5.96255	24.4176	6.32671	UP
contig57089	39.3307	168.676	355.894	67.7657	UP	AT5G25940.1	early nodulin-related
contig43571	24.7166	149.507	223.288	4.50356	UP	AT1G77120.1	alcohol dehydrogenase 1
contig169600	3.46083	10.9102	31.1453	1.54681	UP	AT2G32830.1	phosphate transporter 1;5
contig52631	1.70551	1.67437	15.294	1.85313	UP	AT5G25280.1	serine-rich protein-related
contig39877	2.49141	4.94781	22.2963	4.0704	UP	AT2G19590.1	ACC oxidase 1
contig170187	12.6616	50.5035	113.201	10.248	UP	AT1G21680.1	DPP6 N-terminal domain-like protein
contig3715	2.01415	3.79864	17.9752	1.35052	UP
contig141171	2.8632	9.80281	25.4487	3.77858	UP
contig48377	2.98269	4.97979	25.945	5.13751	UP	AT5G45275.1	Major facilitator superfamily protein
contig58116	14.3915	35.7701	123.1	24.5937	UP	AT1G19530.1	unknown protein; FUNCTIONS IN: molecular_function unknown; INVOLVED IN: N-terminal protein myristoylation anaerobic respiration; LOCATED IN: cellular_component unknown; EXPRESSED IN: leaf apex inflorescence meristem hypocotyl root flower; EXPRESSED DURING: petal differentiation and expansion stage; Has 47 Blast hits to 47 proteins in 13 species: Archae - 0; Bacteria - 0; Metazoa - 0; Fungi - 0; P…
contig46013	7.54001	1488.74	64.4226	306.924	UP	AT1G56430.1	nicotianamine synthase 4
contig7360	1.78884	2.04959	15.1609	1.7893	UP	AT1G08090.1	nitrate transporter 2:1
contig32595	9.80067	20.0043	82.8562	26.6418	UP	AT2G35510.1	similar to RCD one 1
contig19663	2.69567	9.8736	22.7626	1.22112	UP	AT4G10530.1	Subtilase family protein
contig26761	2.63399	6.48651	21.5723	3.88457	UP
contig20065	3.24598	5.63778	26.4003	6.73293	UP	AT3G47160.2	RING/U-box superfamily protein
contig6354	20.6087	28.0886	163.637	28.1607	UP
contig76641	2.86196	7.56524	22.699	5.15696	UP	AT4G33420.1	Peroxidase superfamily protein
contig40818	4.56591	10.5771	35.9347	9.24059	UP	AT2G35680.1	Phosphotyrosine protein phosphatases superfamily protein
contig19664	2.46007	6.62472	19.277	1.14655	UP	AT4G10530.1	Subtilase family protein
contig63028	2.77035	1.94107	21.5502	8.97199	UP
contig72901	2.31551	7.31488	17.9744	1.62337	UP	AT1G68840.1	related to ABI3/VP1 2
contig44031	4.254	20.0624	32.8009	11.4925	UP	AT2G20670.1	Protein of unknown function (DUF506)
contig169110	5.38424	12.0167	41.4857	4.62618	UP	AT2G35930.1	plant U-box 23
contig49516	12.5531	33.8204	96.1811	30.6726	UP
contig51602	3.05178	3.91861	23.3333	3.21674	UP	AT1G08090.1	nitrate transporter 2:1
contig18469	10.2259	24.7753	78.1454	18.8406	UP	AT5G44730.2	Haloacid dehalogenase-like hydrolase (HAD) superfamily protein
contig46232	4.62533	14.7115	35.2283	3.08094	UP	AT5G49760.1	Leucine-rich repeat protein kinase family protein
contig169117	2.30796	4.31347	17.4616	5.68781	UP	AT5G60780.1	nitrate transporter 2.3
contig52252	2.86821	3.2937	21.4898	9.70733	UP	AT2G01420.2	Auxin efflux carrier family protein
contig27381	2.3361	7.18293	17.4135	1.90631	UP	AT1G68840.1	related to ABI3/VP1 2
contig5569	2.99187	10.4512	22.2878	4.58256	UP
contig36075	7.23923	17.1149	53.7796	10.2076	UP
contig27709	3.75679	12.1994	27.888	8.27628	UP
contig98921	6.3634	13.4628	47.162	9.91364	UP	AT1G72820.1	Mitochondrial substrate carrier family protein
contig12869	8.73975	16.5887	64.4626	10.8898	UP	AT1G72820.1	Mitochondrial substrate carrier family protein
contig1989	2.56295	4.40445	18.8954	1.26956	UP	AT1G66950.1	pleiotropic drug resistance 11
contig19771	7.12301	16.2429	52.2231	14.4815	UP	AT5G44730.2	Haloacid dehalogenase-like hydrolase (HAD) superfamily protein
contig56925	23.0911	42.0674	169.025	24.9683	UP
contig43996	7.15912	11.9531	52.3909	17.121	UP	AT3G28490.1	Oxoglutarate/iron-dependent oxygenase
contig52080	10.3378	24.4458	75.1082	22.3517	UP
contig23390	3.02327	3.50323	21.8701	9.77169	UP	AT4G17260.1	Lactate/malate dehydrogenase family protein
contig40433	4.19427	9.94241	30.3222	10.6976	UP
contig1350	10.1795	10.1887	73.3464	50.0607	UP	AT1G43890.1	RAB GTPASE HOMOLOG B18
contig27257	10.5844	17.7984	75.2376	41.6311	UP
contig4054	13.8458	9.38822	98.1337	13.4342	UP	AT3G02550.1	LOB domain-containing protein 41
contig168206	3.48736	5.20013	24.6381	2.84662	UP	AT1G43160.1	related to AP2 6
contig58740	3.19713	11.227	22.5556	1.13621	UP	AT1G77330.1	2-oxoglutarate (2OG) and Fe(II)-dependent oxygenase superfamily protein
contig52980	7.69493	18.4908	53.1171	44.0093	UP	AT5G39890.1	Protein of unknown function (DUF1637)
contig113142	8.07772	3.92688	55.5143	15.9753	UP
contig6866	7.55338	663.023	51.8952	281.886	UP	AT1G09240.1	nicotianamine synthase 3
contig71005	4.26058	14.8878	29.2234	7.06732	UP
contig12535	5.03282	10.1535	34.4422	10.7279	UP	AT2G20830.2	transferases;folic acid binding
contig50748	4.52335	13.8703	30.9519	11.9241	UP	AT2G06025.1	Acyl-CoA N-acyltransferases (NAT) superfamily protein
contig167146	2.72425	2.50288	18.5423	24.7355	UP
contig31954	6.7859	18.0803	45.7947	5.19244	UP	AT4G28700.1	ammonium transporter 1;4
contig29727	3.19578	8.4035	21.5595	4.35844	UP	AT1G68840.1	related to ABI3/VP1 2
contig74360	7.36951	9.19549	48.5918	5.18212	UP	AT1G72360.2	Integrase-type DNA-binding superfamily protein
contig27992	2.29572	5.55967	15.0975	1.56296	UP	AT4G10540.1	Subtilase family protein
contig44866	14.4696	28.5202	93.7318	27.2676	UP	AT1G03475.1	Coproporphyrinogen III oxidase
contig34018	5.94478	12.9033	38.209	10.8147	UP	AT5G01520.1	RING/U-box superfamily protein
contig45654	7.75597	5.21378	49.0849	8.11446	UP	AT3G02550.1	LOB domain-containing protein 41
contig9607	3.66566	5.1214	23.1943	9.67299	UP	AT1G58170.1	Disease resistance-responsive (dirigent-like protein) family protein
contig32546	11.9965	17.4463	75.8956	26.8274	UP	AT3G28490.1	Oxoglutarate/iron-dependent oxygenase
contig47390	4.45166	5.3011	27.9962	7.22506	UP	AT1G10390.1	Nucleoporin autopeptidase
contig14163	36.2828	140.267	226.775	58.2311	UP	AT5G37600.1	glutamine synthase clone R1
contig23497	4.10494	6.6176	25.6366	9.50033	UP	AT2G42280.1	basic helix-loop-helix (bHLH) DNA-binding superfamily protein
contig49036	7.28673	6.72516	45.2345	11.6543	UP	AT4G32690.1	hemoglobin 3
contig31463	16.5957	30.826	102.94	54.9942	UP	AT4G17260.1	Lactate/malate dehydrogenase family protein
contig62096	6.36611	777.998	39.4265	270.507	UP	AT1G56430.1	nicotianamine synthase 4
contig23634	2.59025	14.0154	15.5964	11.6336	UP	AT1G06260.1	Cysteine proteinases superfamily protein
contig40019	8.0564	11.9499	48.3716	11.5286	UP	AT5G08790.1	NAC (No Apical Meristem) domain transcriptional regulator superfamily protein
contig25584	3.06063	3.10355	18.3059	13.008	UP	AT4G17260.1	Lactate/malate dehydrogenase family protein
contig44100	10.7065	16.0906	63.4781	28.6337	UP	AT2G30490.1	cinnamate-4-hydroxylase
contig38380	11.726	27.0817	69.2494	20.6892	UP	AT2G47710.1	Adenine nucleotide alpha hydrolases-like superfamily protein
contig53230	3.56401	5.54243	20.9996	6.90004	UP	AT2G47710.1	Adenine nucleotide alpha hydrolases-like superfamily protein
contig11402	3.82534	14.5295	22.43	2.01058	UP	AT5G38960.1	RmlC-like cupins superfamily protein
contig75496	4.35494	6.72372	25.4282	11.3133	UP	AT2G19590.1	ACC oxidase 1
contig41710	8.59393	20.9933	50.1391	10.7715	UP
contig47410	11.0241	45.212	64.2532	22.9657	UP
contig30199	3.23382	6.14957	18.7721	3.92198	UP	AT1G64530.1	Plant regulator RWP-RK family protein
contig35105	3.39243	6.74866	19.6831	7.57806	UP	AT4G05200.1	cysteine-rich RLK (RECEPTOR-like protein kinase) 25
contig63036	5.78223	8.72578	33.5218	4.62186	UP	AT1G08090.1	nitrate transporter 2:1
contig71856	3.02052	4.30903	17.5071	2.8234	UP	AT1G30040.1	gibberellin 2-oxidase
contig5172	17.7446	23.7495	102.678	8.19595	UP
contig33412	5.23319	16.629	30.2389	6.68086	UP	AT3G13340.1	Transducin/WD40 repeat-like superfamily protein
contig6754	3.41626	4.11731	19.6938	2.66896	UP	AT1G08090.1	nitrate transporter 2:1
contig29588	3.27949	5.03136	18.8681	4.16877	UP	AT3G57062.1	unknown protein; FUNCTIONS IN: molecular_function unknown; INVOLVED IN: biological_process unknown; LOCATED IN: endomembrane system; Has 30201 Blast hits to 17322 proteins in 780 species: Archae - 12; Bacteria - 1396; Metazoa - 17338; Fungi - 3422; Plants - 5037; Viruses - 0; Other Eukaryotes - 2996 (source: NCBI BLink).
contig131248	3.73609	1.41885	21.3496	5.7439	UP
contig40805	9.80833	629.379	55.9267	348.498	UP	AT1G09240.1	nicotianamine synthase 3
contig63595	17.8428	84.4936	101.129	15.4114	UP
contig55580	3.61404	707.512	20.4538	383.42	UP
contig119480	4.58407	12.4521	25.9179	4.98169	UP	AT2G20670.1	Protein of unknown function (DUF506)
contig4706	21.9609	20.9024	124.08	95.916	UP	AT1G33140.1	Ribosomal protein L6 family
contig45999	4.94361	5.92378	27.8326	12.2239	UP	AT5G15100.1	Auxin efflux carrier family protein
contig22217	5.22662	6.93379	29.2975	9.27693	UP	AT1G01720.1	NAC (No Apical Meristem) domain transcriptional regulator superfamily protein
contig12240	56.5363	198.815	316.67	69.9918	UP	AT5G16570.1	glutamine synthetase 1;4
contig53940	46.4253	190.855	257.327	38.0305	UP	AT5G45890.1	senescence-associated gene 12
contig4198	4.59427	6.89149	25.1528	16.8866	UP
contig10700	4.65292	20.1413	25.1437	11.539	UP	AT3G55840.1	Hs1pro-1 protein
contig19334	23.8784	85.61	128.709	11.5217	UP	AT3G29970.1	B12D protein
contig27978	4.88911	7.39363	26.3368	18.1822	UP
contig13622	5.44525	7.88273	29.2592	8.18548	UP	AT1G01720.1	NAC (No Apical Meristem) domain transcriptional regulator superfamily protein
contig10245	2.97364	1.15084	15.9402	2.73917	UP
contig18598	9.22813	26.2682	49.3469	16.3612	UP	AT1G12110.1	nitrate transporter 1.1
contig24609	22.2421	28.6518	118.849	71.8898	UP
contig43878	4.14354	5.42437	22.0292	3.29385	UP	AT5G63790.1	NAC domain containing protein 102
contig20811	13.7933	20.9277	72.5687	14.4575	UP
contig25573	8.81802	18.7408	45.9705	18.5076	UP	AT2G20830.2	transferases;folic acid binding
contig2471	4.08987	10.6488	20.7777	4.42158	UP	AT3G24290.1	ammonium transporter 1;5
contig21151	15.1407	30.6247	76.722	12.2281	UP	AT3G47730.1	ATP-binding cassette A2
contig63324	7.37167	7.43997	37.336	8.11126	UP	AT5G47060.1	Protein of unknown function (DUF581)
contig12508	19.9489	53.1497	100.976	35.6857	UP	AT2G24550.1	unknown protein; BEST Arabidopsis thaliana protein match is: unknown protein (TAIR:AT4G31510.1); Has 219 Blast hits to 219 proteins in 33 species: Archae - 0; Bacteria - 0; Metazoa - 16; Fungi - 2; Plants - 184; Viruses - 0; Other Eukaryotes - 17 (source: NCBI BLink).
contig30107	4.63234	13.9718	23.3599	3.86269	UP	AT1G80530.1	Major facilitator superfamily protein
contig43196	4.20622	9.18743	21.1685	7.35863	UP	AT2G22190.1	Haloacid dehalogenase-like hydrolase (HAD) superfamily protein
contig6732	13.3408	13.6197	67.0963	43.3522	UP	AT2G33150.1	peroxisomal 3-ketoacyl-CoA thiolase 3
contig61852	5.57318	11.4074	27.9737	6.71118	UP	AT4G33420.1	Peroxidase superfamily protein
contig10835	14.0438	15.9854	70.2383	38.9489	UP	AT2G30490.1	cinnamate-4-hydroxylase
contig67668	4.02898	5.45928	19.9589	10.2317	UP	AT4G35840.1	RING/U-box superfamily protein
contig51767	4.10424	11.2446	20.241	2.38193	UP	AT4G13510.1	ammonium transporter 1;1
contig10098	72.9901	115.075	359.28	106.338	UP	AT5G27760.1	Hypoxia-responsive family protein
contig58741	15.119	57.94	74.4113	10.8949	UP	AT1G77330.1	2-oxoglutarate (2OG) and Fe(II)-dependent oxygenase superfamily protein
contig47958	5.13409	14.2023	25.1067	5.1521	UP	AT5G07990.1	Cytochrome P450 superfamily protein
contig71087	9.35104	45.4568	45.7007	5.31792	UP
contig5888	5.29293	5.27993	25.8262	6.79756	UP	AT5G17330.1	glutamate decarboxylase
contig2820	22.7942	58.7792	110.939	31.0924	UP	AT4G26270.1	phosphofructokinase 3
contig2362	5.30196	20.0913	25.7464	7.74138	UP	AT3G06483.1	pyruvate dehydrogenase kinase
contig9843	23.5635	60.226	114.141	22.5419	UP	AT4G33950.1	Protein kinase superfamily protein
contig68215	5.58351	10.6521	27.0456	15.7698	UP	AT5G39890.1	Protein of unknown function (DUF1637)
contig19847	13.9461	16.275	67.3766	30.6523	UP	AT2G21940.4	shikimate kinase 1
contig27991	10.4696	25.4484	50.4864	3.99388	UP	AT4G10510.1	Subtilase family protein
contig28841	4.15793	8.56548	20.0297	3.12085	UP
contig35044	10.2708	691.077	49.2054	419.769	UP
contig82199	3.81868	7.15023	18.1433	3.77476	UP
contig582	16.0029	29.5506	75.4208	26.0588	UP
contig59283	39.1519	78.9973	181.011	27.7419	UP	AT3G54700.1	phosphate transporter 1;7
contig17846	7.60567	10.1415	34.9257	12.7441	UP
contig76826	46.3066	139.598	212.355	39.5819	UP	AT3G49340.1	Cysteine proteinases superfamily protein
contig167566	5.35479	10.8505	24.447	4.2655	UP	AT5G54500.2	flavodoxin-like quinone reductase 1
contig44015	5.52732	6.00317	25.23	41.8131	UP
contig60843	5.33251	22.5667	24.2013	5.45681	UP
contig52283	4.95959	19.5299	22.4861	5.10346	UP
contig9041	32.9362	93.9689	149.026	96.8758	UP	AT4G27450.1	Aluminium induced protein with YGL and LRDR motifs
contig27518	12.9382	15.8605	58.4798	24.093	UP	AT5G05340.1	Peroxidase superfamily protein
contig43124	4.67969	8.37691	20.7696	4.61703	UP	AT1G65680.1	expansin B2
contig40356	15.0624	30.786	66.7859	13.5466	UP	AT2G15890.1	maternal effect embryo arrest 14
contig4404	76.1017	232.58	337.078	73.2078	UP	AT4G33070.1	Thiamine pyrophosphate dependent pyruvate decarboxylase family protein
contig48731	6.59021	10.3381	29.1874	2.85036	UP	AT2G26670.1	Plant haem oxygenase (decyclizing) family protein
contig64185	4.36782	5.21023	19.3392	10.6044	UP	AT4G35840.1	RING/U-box superfamily protein
contig74228	37.6573	6.22367	166.727	4.2516	UP	AT5G59720.1	heat shock protein 18.2
contig13683	5.98731	11.89	26.1528	4.0861	UP	AT3G01420.1	Peroxidase superfamily protein
contig6081	4.24955	7.79757	18.5554	3.41626	UP	AT5G36110.1	cytochrome P450 family 716 subfamily A polypeptide 1
contig6342	22.8665	58.3967	99.5912	52.6617	UP
contig43353	4.12049	6.46476	17.9277	12.8057	UP
contig27785	4.69961	12.7576	20.3687	4.77291	UP	AT1G65680.1	expansin B2
contig95605	7.6538	7.89412	33.1622	11.4923	UP	AT2G47520.1	Integrase-type DNA-binding superfamily protein
contig50845	16.2475	62.5515	70.271	22.8771	UP	AT3G06483.1	pyruvate dehydrogenase kinase
contig4740	990.157	2015.51	4279.69	694.717	UP	AT1G13440.1	glyceraldehyde-3-phosphate dehydrogenase C2
contig25125	7.25314	9.94136	31.3066	12.6677	UP	AT4G17940.1	Tetratricopeptide repeat (TPR)-like superfamily protein
contig47996	5.21167	16.4353	22.4811	7.62806	UP	AT4G17940.1	Tetratricopeptide repeat (TPR)-like superfamily protein
contig64054	7.25309	8.6109	30.9256	18.6948	UP	AT5G03230.1	Protein of unknown function DUF584
contig74935	4.8068	5.17539	20.4825	5.17737	UP	AT5G47060.1	Protein of unknown function (DUF581)
contig27606	7.35091	321.234	31.2883	106.5	UP	AT1G56430.1	nicotianamine synthase 4
contig22944	10.8798	18.7163	46.2924	14.4638	UP	AT1G61800.1	glucose-6-phosphate/phosphate translocator 2
contig156459	4.23706	9.2177	17.928	6.71072	UP	AT5G46330.1	Leucine-rich receptor-like protein kinase family protein
contig32263	3.58043	8.60172	15.1388	1.23555	UP
contig60715	6.32359	9.56605	26.7364	8.89985	UP	AT5G53560.1	cytochrome B5 isoform E
contig163625	9.10824	9.42128	38.4011	24.2528	UP
contig37153	9.88273	12.2833	41.5602	16.5889	UP
contig42154	5.52746	18.3469	23.2175	5.66937	UP	AT4G02600.1	Seven transmembrane MLO family protein
contig16469	21.8308	40.4488	91.4215	29.8536	UP	AT1G03475.1	Coproporphyrinogen III oxidase
contig156672	11.9804	32.1193	50.1616	15.3325	UP	AT2G47710.1	Adenine nucleotide alpha hydrolases-like superfamily protein
contig17002	5.68385	8.40561	23.7631	7.35813	UP	AT1G72210.1	basic helix-loop-helix (bHLH) DNA-binding superfamily protein
contig26441	5.46718	6.18183	22.8483	13.847	UP	AT2G22190.1	Haloacid dehalogenase-like hydrolase (HAD) superfamily protein
contig29342	22.0156	9.72958	91.6136	27.0569	UP
contig27322	9.0778	20.8627	37.6266	11.9719	UP	AT4G21390.1	S-locus lectin protein kinase family protein
contig2457	17.818	4.60823	73.6851	17.4073	UP
contig29246	10.4399	21.429	42.9761	11.4088	UP	AT4G13510.1	ammonium transporter 1;1
contig38251	4.48619	8.03604	18.4417	4.28924	UP	AT4G07960.1	Cellulose-synthase-like C12
contig6338	14.2826	31.1608	58.6601	21.7277	UP	AT2G24550.1	unknown protein; BEST Arabidopsis thaliana protein match is: unknown protein (TAIR:AT4G31510.1); Has 219 Blast hits to 219 proteins in 33 species: Archae - 0; Bacteria - 0; Metazoa - 16; Fungi - 2; Plants - 184; Viruses - 0; Other Eukaryotes - 17 (source: NCBI BLink).
contig34278	9.88961	20.0318	40.6047	15.8567	UP	AT1G77760.1	nitrate reductase 1
contig38130	4.29854	10.1412	17.6411	4.09724	UP
contig43976	6.63573	16.9803	27.1658	8.85232	UP	AT1G11330.2	S-locus lectin protein kinase family protein
contig33413	4.13968	8.75652	16.9373	4.01814	UP	AT3G13340.1	Transducin/WD40 repeat-like superfamily protein
contig167385	8.58442	17.1767	35.1031	7.11608	UP	AT2G17850.1	Rhodanese/Cell cycle control phosphatase superfamily protein
contig2650	3.76528	5.3044	15.3526	2.07853	UP	AT3G47790.1	ABC2 homolog 7
contig14107	32.5614	137.922	132.305	45.0206	UP	AT3G15450.1	Aluminium induced protein with YGL and LRDR motifs
contig573	27.3015	52.8193	110.932	20.3577	UP	AT1G17290.1	alanine aminotransferas
contig7110	7.06899	15.9348	28.7201	10.5445	UP
contig33619	6.3335	22.2901	25.7047	3.53688	UP	AT2G42600.2	phosphoenolpyruvate carboxylase 2
contig43974	9.2663	16.7281	37.5648	10.1631	UP	AT1G65680.1	expansin B2
contig4801	94.7666	355.115	383.717	38.3368	UP	AT1G77120.1	alcohol dehydrogenase 1
contig35572	4.09894	9.38668	16.5395	4.94503	UP	AT5G56760.1	serine acetyltransferase 1;1
contig43727	6.37296	10.0856	25.7117	0.669235	UP
contig17609	10.4464	12.8599	42.1319	16.0162	UP
contig12883	5.10586	9.54746	20.574	2.94041	UP	AT1G05260.1	Peroxidase superfamily protein
contig50208	4.41524	9.87786	17.7575	2.16027	UP
contig2821	36.627	78.1625	147.161	50.7287	UP	AT4G26270.1	phosphofructokinase 3
contig17811	11.0572	28.4849	44.4215	5.80411	UP
contig58280	4.45805	6.12353	17.9095	5.50365	UP	AT1G78440.1	Arabidopsis thaliana gibberellin 2-oxidase 1
contig46448	7.33785	20.1934	29.4595	12.2103	UP
contig66236	11.799	19.6733	47.3608	27.5609	UP	AT2G19590.1	ACC oxidase 1
contig123176	4.01728	2.77891	16.1052	17.0785	UP
contig9107	5.72007	12.9317	22.9303	3.09254	UP	AT3G62020.1	germin-like protein 10
contig1326	94.6757	270.026	378.207	90.9846	UP	AT1G77120.1	alcohol dehydrogenase 1
contig24794	16.5279	19.5318	65.9808	24.7139	UP	AT2G25940.1	alpha-vacuolar processing enzyme
contig523	104.996	375.33	418.388	76.2423	UP	AT1G77120.1	alcohol dehydrogenase 1
contig169173	6.70642	13.7012	26.7192	14.2933	UP	AT5G15180.1	Peroxidase superfamily protein
contig6085	41.7617	56.4936	166.338	55.165	UP	AT5G08570.1	Pyruvate kinase family protein
contig107551	10.3164	15.2153	41.0022	8.93348	UP
contig65644	4.54068	9.27913	18.0235	5.06471	UP
contig54739	4.56212	11.2639	18.0724	4.19063	UP	AT5G33280.1	Voltage-gated chloride channel family protein
contig2563	9.37137	28.995	37.1199	9.12206	UP	AT5G39110.1	RmlC-like cupins superfamily protein
contig18466	6.0237	18.2358	23.7975	9.02098	UP	AT4G02600.1	Seven transmembrane MLO family protein
contig45698	8.06821	20.4908	31.8268	10.0105	UP	AT5G14700.1	NAD(P)-binding Rossmann-fold superfamily protein
contig38686	4.82948	4.17566	19.0436	12.6065	UP
contig18424	10.5654	1178.33	41.4911	522.867	UP	AT1G09240.1	nicotianamine synthase 3
contig168301	49.0696	105.316	192.626	46.307	UP	AT2G32830.1	phosphate transporter 1;5
contig68759	6.57788	6.71151	25.761	10.5392	UP	AT3G16770.1	ethylene-responsive element binding protein
contig25836	5.3479	7.84149	20.893	8.29506	UP	AT1G13700.1	6-phosphogluconolactonase 1
contig12449	7.10148	26.2394	27.7422	10.8017	UP	AT1G21460.1	Nodulin MtN3 family protein
contig31636	8.88262	28.2448	34.6929	9.07625	UP	AT5G07990.1	Cytochrome P450 superfamily protein
contig19971	4.03492	11.2084	15.759	2.97536	UP
contig25005	6.25905	11.4902	24.4175	3.23035	UP	AT5G17820.1	Peroxidase superfamily protein
contig130157	4.06042	13.9716	15.8166	2.35851	UP	AT5G10930.1	CBL-interacting protein kinase 5
contig38114	4.02837	11.9248	15.6709	1.13074	UP	AT1G28600.1	GDSL-like Lipase/Acylhydrolase superfamily protein
contig14300	20.9318	29.8753	81.334	29.7759	UP	AT1G25280.1	tubby like protein 10
contig91022	6.56913	8.03287	25.4369	7.94916	UP
contig47280	5.97967	11.7317	23.0802	5.15754	UP	AT5G38960.1	RmlC-like cupins superfamily protein
contig51342	5.89436	3.17038	22.7051	19.7	UP
contig26394	13.8202	19.3015	53.1796	21.9374	UP	AT2G35680.1	Phosphotyrosine protein phosphatases superfamily protein
contig42938	7.12345	35.7491	27.3334	47.8299	UP	AT1G22540.1	Major facilitator superfamily protein
contig63077	10.5331	15.9825	40.3944	4.88623	UP	AT2G23780.1	RING/U-box superfamily protein
contig26055	11.1321	5.89839	42.4738	7.40804	UP
contig41702	6.76909	9.03074	25.7234	14.1798	UP
contig11486	4.4919	4.87748	16.9945	3.6788	UP	AT2G47000.1	ATP binding cassette subfamily B4
contig167707	16.1235	25.9046	60.9722	8.39016	UP	AT3G14230.1	related to AP2 2
contig45553	8.42994	69.7327	31.7249	12.6882	UP	AT5G47560.1	tonoplast dicarboxylate transporter
contig2655	28.043	67.105	105.46	30.2207	UP	AT1G76550.1	Phosphofructokinase family protein
contig5173	57.9615	50.9113	217.912	18.411	UP
contig95861	11.9386	30.0498	44.8642	6.83768	UP	AT1G51800.1	Leucine-rich repeat protein kinase family protein
contig32849	5.4383	13.3246	20.4167	3.57178	UP	AT5G05340.1	Peroxidase superfamily protein
contig65163	20.4746	40.5712	76.8165	11.7324	UP	AT3G54700.1	phosphate transporter 1;7
contig14823	9.85459	12.4451	36.9511	16.6554	UP	AT2G25940.1	alpha-vacuolar processing enzyme
contig38470	5.2288	13.2294	19.5613	7.71932	UP
contig34989	43.6648	109.765	163.232	22.1962	UP	AT3G54700.1	phosphate transporter 1;7
contig2960	4.64001	9.31311	17.2994	4.75267	UP	AT1G11340.1	S-locus lectin protein kinase family protein
contig45574	5.42564	9.92825	20.2148	6.02516	UP	AT2G22125.1	binding
contig402	9.67085	22.6253	35.9453	7.48897	UP	AT1G03610.1	Protein of unknown function (DUF789)
contig66735	17.224	18.5062	64.0145	22.1053	UP	AT3G05640.1	Protein phosphatase 2C family protein
contig26698	11.1336	25.0704	41.1518	19.2367	UP	AT5G22920.1	CHY-type/CTCHY-type/RING-type Zinc finger protein
contig5500	26.207	31.1962	96.7872	56.7859	UP	AT5G17330.1	glutamate decarboxylase
contig17747	34.5304	81.8454	127.182	25.1294	UP
contig20823	40.6026	61.6145	149.433	55.465	UP	AT2G40890.1	cytochrome P450 family 98 subfamily A polypeptide 3
contig14796	13.3409	19.8651	49.0449	9.57133	UP	AT1G80160.1	Lactoylglutathione lyase / glyoxalase I family protein
contig17894	4.31923	8.28338	15.8524	1.76847	UP	AT1G32950.1	Subtilase family protein
contig34232	5.66109	12.918	20.7304	3.89716	UP
contig18964	5.42354	6.31529	19.7812	5.27538	UP	AT1G10360.1	glutathione S-transferase TAU 18
contig18277	4.25822	12.8633	15.5187	4.99512	UP	AT2G02040.1	peptide transporter 2
contig28419	12.3198	20.5351	44.873	19.2624	UP	AT5G17420.1	Cellulose synthase family protein
contig19490	6.362	13.3489	23.1298	7.72912	UP
contig4523	9.48759	10.6522	34.3811	6.23896	UP	AT3G01470.1	homeobox 1
contig12752	5.47089	2.92248	19.8252	5.08398	UP	AT5G42650.1	allene oxide synthase
contig8362	6.82299	12.4467	24.6915	9.5404	UP	AT4G27470.1	RING membrane-anchor 3
contig168617	7.05637	8.46309	25.5293	7.2143	UP
contig158307	5.28305	12.3993	19.1055	5.64487	UP	AT1G77760.1	nitrate reductase 1
contig6730	19.2962	41.2629	69.7228	19.8948	UP	AT4G10540.1	Subtilase family protein
contig2305	99.3468	65.2905	358.871	30.5356	UP
contig11798	5.34206	9.98417	19.2823	14.2063	UP	AT2G21320.1	B-box zinc finger family protein
contig68020	5.71211	11.289	20.6159	7.09913	UP	AT1G19740.1	ATP-dependent protease La (LON) domain protein
contig167213	4.56232	12.7895	16.4521	1.222	UP
contig8360	4.20903	6.03102	15.13	5.5767	UP	AT2G41250.1	Haloacid dehalogenase-like hydrolase (HAD) superfamily protein
contig43952	4.29075	21.5546	15.4237	9.18163	UP	AT3G55840.1	Hs1pro-1 protein
contig171247	37.254	62.4668	133.841	88.9329	UP
contig51674	4.88444	26.2124	17.5273	4.92645	UP	AT2G17850.1	Rhodanese/Cell cycle control phosphatase superfamily protein
contig43112	4.97331	10.9962	17.8337	5.74459	UP	AT4G17770.1	trehalose phosphatase/synthase 5
contig47808	5.79162	18.8286	20.7651	4.36007	UP	AT3G09220.1	laccase 7
contig59033	11.4364	31.0944	40.8769	6.95931	UP	AT5G54160.1	O-methyltransferase 1
contig30673	6.71804	4.08461	24.0029	4.52721	UP	AT5G42650.1	allene oxide synthase
contig50087	19.3361	41.7036	68.8769	40.7675	UP	AT2G45180.1	Bifunctional inhibitor/lipid-transfer protein/seed storage 2S albumin superfamily protein
contig45286	6.45613	12.9703	22.9878	6.35662	UP	AT3G55440.1	triosephosphate isomerase
contig44392	5.30561	10.9131	18.8849	5.74071	UP	AT1G01490.1	Heavy metal transport/detoxification superfamily protein
contig168261	17.0566	24.4821	60.6982	79.8945	UP
contig7916	10.5349	21.5137	37.4545	20.7163	UP	AT5G43580.1	Serine protease inhibitor potato inhibitor I-type family protein
contig18237	16.8401	32.4948	59.8604	12.6354	UP	AT5G62740.1	SPFH/Band 7/PHB domain-containing membrane-associated protein family
contig17752	4.57123	5.64499	16.1934	8.57502	UP	AT2G35060.2	K+ uptake permease 11
contig5669	12.5027	845.616	44.1981	248.137	UP	AT1G56430.1	nicotianamine synthase 4
contig47431	22.461	42.555	79.254	25.0379	UP	AT1G25280.1	tubby like protein 10
contig34992	5.14427	7.43511	18.1016	5.67209	UP	AT5G10930.1	CBL-interacting protein kinase 5
contig14602	73.8347	211.991	259.511	148.213	UP
contig78783	18.1555	34.8945	63.7962	42.6474	UP
contig7200	1453.01	2522.88	5079.59	689.056	UP	AT1G13440.1	glyceraldehyde-3-phosphate dehydrogenase C2
contig22321	7.10625	4.75769	24.8145	32.1824	UP	AT4G25720.1	glutaminyl cyclase
contig167138	5.09854	19.1566	17.8011	7.01763	UP
contig542	38.7343	57.5303	135.139	62.7367	UP	AT1G53910.1	related to AP2 12
contig19087	8.44154	27.8202	29.4466	6.61655	UP	AT1G15740.1	Leucine-rich repeat family protein
contig1089	29.113	38.94	101.546	41.4624	UP	AT2G21940.4	shikimate kinase 1
contig29728	6.14189	13.5652	21.4096	4.1045	UP	AT1G68840.1	related to ABI3/VP1 2
contig20013	11.7371	17.5272	40.8406	15.4988	UP	AT5G17420.1	Cellulose synthase family protein
contig9081	10.3473	18.5286	35.9159	12.5097	UP	AT4G23180.1	cysteine-rich RLK (RECEPTOR-like protein kinase) 10
contig56324	7.95629	9.80537	27.6076	8.37458	UP	AT1G30040.1	gibberellin 2-oxidase
contig70102	25.7638	56.622	89.3196	51.8986	UP
contig44164	9.5583	4.01574	33.1171	5.07298	UP
contig13241	24.7664	23.4648	85.6814	28.9221	UP
contig14402	7.23366	31.6359	24.932	7.37471	UP	AT2G05790.1	O-Glycosyl hydrolases family 17 protein
contig49959	7.39915	27.7395	25.4766	6.13981	UP	AT3G53260.1	phenylalanine ammonia-lyase 2
contig4571	153.704	296.814	527.832	145.539	UP	AT3G52990.1	Pyruvate kinase family protein
contig14894	29.1042	71.1433	99.6565	28.064	UP	AT5G54160.1	O-methyltransferase 1
contig1625	6.56654	13.2528	22.3379	6.16283	UP	AT2G03890.1	phosphoinositide 4-kinase gamma 7
contig29829	7.11984	19.168	24.1986	6.86171	UP	AT3G59340.1	Eukaryotic protein of unknown function (DUF914)
contig64036	4.6314	5.70034	15.7364	8.02609	UP	AT1G72210.1	basic helix-loop-helix (bHLH) DNA-binding superfamily protein
contig25725	10.215	25.1621	34.7045	13.9614	UP	AT1G80530.1	Major facilitator superfamily protein
contig70059	5.08275	13.081	17.23	11.1124	UP
contig9718	10.4311	13.1714	35.2929	20.298	UP
contig27544	18.4626	40.1633	62.2324	22.1358	UP	AT3G12500.1	basic chitinase
contig32859	121.052	364.379	406.41	84.8332	UP	AT3G53420.1	plasma membrane intrinsic protein 2A
contig4405	46.6064	115.875	155.833	41.2905	UP	AT4G33070.1	Thiamine pyrophosphate dependent pyruvate decarboxylase family protein
contig53422	10.0635	14.4817	33.6367	13.35	UP	AT3G48140.1	B12D protein
contig35696	23.4704	37.5026	78.3891	21.2276	UP	AT5G48485.1	Bifunctional inhibitor/lipid-transfer protein/seed storage 2S albumin superfamily protein
contig26943	6.80534	27.0103	22.7236	6.55384	UP
contig1711	10.0908	21.577	33.6736	21.5279	UP
contig57200	7.87747	15.3032	26.2576	5.42065	UP	AT5G50000.1	Protein kinase superfamily protein
contig2036	60.1301	113.237	200.086	71.2251	UP	AT1G56700.1	Peptidase C15 pyroglutamyl peptidase I-like
contig18288	17.6421	21.3277	58.6445	12.9382	UP	AT5G62740.1	SPFH/Band 7/PHB domain-containing membrane-associated protein family
contig14748	9.74607	16.0834	32.3613	12.1167	UP	AT2G19810.1	CCCH-type zinc finger family protein
contig10600	7.15073	15.7674	23.7382	9.58653	UP
contig13154	19.1009	9.6522	63.2356	10.7833	UP
contig59179	8.08718	8.65979	26.7613	10.7155	UP
contig70275	9.14964	20.364	30.2205	8.57627	UP
contig21569	18.1	12.6446	59.6402	4.87544	UP	AT3G47420.1	phosphate starvation-induced gene 3
contig24325	11.8176	16.5981	38.8139	12.8415	UP	AT2G43710.2	Plant stearoyl-acyl-carrier-protein desaturase family protein
contig29069	5.09298	5.42078	16.7254	12.9146	UP	AT1G71900.1	Protein of unknown function (DUF803)
contig26797	10.6049	25.4984	34.8172	10.6448	UP	AT1G80530.1	Major facilitator superfamily protein
contig155804	12.9157	33.1861	42.3572	14.8147	UP	AT5G26010.1	Protein phosphatase 2C family protein
contig54698	5.46589	13.651	17.9015	5.40631	UP	AT4G37180.2	Homeodomain-like superfamily protein
contig17754	27.4191	47.5164	89.7162	19.5583	UP	AT4G35160.1	O-methyltransferase family protein
contig16811	12.2179	17.5665	39.9728	8.87287	UP
contig21917	26.5425	29.0987	86.7126	18.7166	UP
contig12112	11.6911	19.6975	38.1032	12.1036	UP	AT5G54160.1	O-methyltransferase 1
contig30734	8.42962	11.2062	27.4626	11.1657	UP
contig1090	11.686	15.4306	38.0301	12.5079	UP	AT4G26270.1	phosphofructokinase 3
contig156070	6.59242	15.3093	21.4169	0.582159	UP	AT5G24090.1	chitinase A
contig68355	4.91428	5.98356	15.9275	12.8483	UP	AT2G30490.1	cinnamate-4-hydroxylase
contig18208	17.997	16.342	57.8567	15.2805	UP	AT1G72720.1	Protein of unknown function (DUF3511)
contig5120	10.2774	11.7768	33.0239	20.5414	UP	AT5G53460.1	NADH-dependent glutamate synthase 1
contig51424	8.954	12.4256	28.7495	7.67729	UP	AT1G49850.1	RING/U-box superfamily protein
contig12163	6.14356	4.91586	19.6997	2.48384	UP	AT4G16260.1	Glycosyl hydrolase superfamily protein
contig17817	6.93731	6.94742	22.2212	10.1651	UP	AT2G35040.1	AICARFT/IMPCHase bienzyme family protein
contig23516	42.5576	107.195	136.303	49.6169	UP	AT5G05340.1	Peroxidase superfamily protein
contig23518	26.9296	46.6508	86.2155	33.3369	UP	AT4G23270.1	cysteine-rich RLK (RECEPTOR-like protein kinase) 19
contig16467	5.95561	7.0794	19.0199	9.73854	UP	AT4G36220.1	ferulic acid 5-hydroxylase 1
contig771	8.39742	6.28282	26.7619	9.02814	UP	AT5G03380.1	Heavy metal transport/detoxification superfamily protein
contig8426	26.6601	53.9998	84.9525	26.4028	UP	AT2G26230.1	uricase / urate oxidase / nodulin 35 putative
contig62936	11.1368	12.7549	35.4501	8.29284	UP
contig3283	8.17666	16.3099	26.0161	5.03938	UP	AT5G49760.1	Leucine-rich repeat protein kinase family protein
contig8603	14.0034	20.8278	44.5228	29.009	UP	AT3G47640.1	basic helix-loop-helix (bHLH) DNA-binding superfamily protein
contig2919	268.342	442.727	852.144	144.632	UP	AT1G13440.1	glyceraldehyde-3-phosphate dehydrogenase C2
contig59298	7.66383	18.1879	24.2575	6.89627	UP	AT2G24100.1	unknown protein; BEST Arabidopsis thaliana protein match is: unknown protein (TAIR:AT4G30780.1); Has 101 Blast hits to 101 proteins in 16 species: Archae - 0; Bacteria - 0; Metazoa - 0; Fungi - 0; Plants - 95; Viruses - 0; Other Eukaryotes - 6 (source: NCBI BLink).
contig37782	7.6464	39.4244	24.1905	22.6517	UP	AT5G53550.1	YELLOW STRIPE like 3
contig157439	6.46528	2.63371	20.4329	0.689804	UP	AT5G59720.1	heat shock protein 18.2
contig29260	7.03668	10.7224	22.2062	7.61413	UP	AT5G17060.1	ADP-ribosylation factor B1B
contig55959	6.78567	9.1107	21.4133	2.52297	UP	AT5G06740.1	Concanavalin A-like lectin protein kinase family protein
contig60190	6.92684	22.6054	21.8373	8.32934	UP	AT5G50760.1	SAUR-like auxin-responsive protein family
contig26633	8.36338	19.7753	26.332	6.22095	UP	AT5G48930.1	hydroxycinnamoyl-CoA shikimate/quinate hydroxycinnamoyl transferase
contig41041	51.408	77.7822	161.257	75.4724	UP	AT4G12510.1	Bifunctional inhibitor/lipid-transfer protein/seed storage 2S albumin superfamily protein
contig9151	9.76768	70.2483	30.6221	22.0199	UP	AT5G53550.1	YELLOW STRIPE like 3
contig22051	60.8154	42.8194	190.428	179.703	UP	AT3G52590.1	ubiquitin extension protein 1
contig1091	7.89941	10.7267	24.7233	5.83573	UP	AT4G26270.1	phosphofructokinase 3
contig55314	8.43173	26.075	26.3872	17.3926	UP	AT5G63160.1	BTB and TAZ domain protein 1
contig23876	4.94735	12.3566	15.4615	3.87058	UP	AT1G79620.1	Leucine-rich repeat protein kinase family protein
contig40682	4.98556	5.71961	15.5635	6.84074	UP	AT2G02040.1	peptide transporter 2
contig35329	9.60063	20.5556	29.9692	10.1677	UP
contig4375	155.214	238.331	483.978	91.5849	UP	AT5G39150.1	RmlC-like cupins superfamily protein
contig20808	17.2887	14.128	53.8224	21.7447	UP	AT1G72280.1	endoplasmic reticulum oxidoreductins 1
contig19324	4.91356	12.2116	15.2726	4.31498	UP	AT5G59520.1	ZRT/IRT-like protein 2
contig15086	10.9449	12.6412	34.0141	8.55002	UP	AT2G41250.1	Haloacid dehalogenase-like hydrolase (HAD) superfamily protein
contig19560	18.5794	24.5002	57.6957	16.2367	UP	AT4G23760.1	Cox19-like CHCH family protein
contig12321	7.67354	10.6255	23.8273	7.78327	UP	AT1G21410.1	F-box/RNI-like superfamily protein
contig34710	35.1437	92.4499	109.114	30.6906	UP	AT2G15890.1	maternal effect embryo arrest 14
contig43457	6.60501	8.97843	20.4989	5.2045	UP	AT1G64530.1	Plant regulator RWP-RK family protein
contig31152	14.1699	37.6074	43.9757	11.7464	UP	AT5G09810.1	actin 7
contig26634	7.837	604.49	24.2627	240.672	UP
contig43430	32.5673	73.7509	100.733	31.3693	UP	AT5G37600.1	glutamine synthase clone R1
contig1412	5.75739	13.4253	17.8075	4.53539	UP
contig19670	53.1821	78.1056	164.43	69.2816	UP
contig11316	6.15417	17.1137	19.0179	8.18205	UP	AT5G06720.1	peroxidase 2
contig541	44.9052	73.6115	138.594	53.7928	UP	AT1G53910.1	related to AP2 12
contig21932	6.85919	17.6672	21.1228	9.60763	UP	AT5G58390.1	Peroxidase superfamily protein
contig19197	6.06529	21.2374	18.6671	4.8283	UP	AT1G15960.1	NRAMP metal ion transporter 6
contig47133	11.6704	23.3399	35.9164	14.9228	UP	AT4G27470.1	RING membrane-anchor 3
contig167197	9.27245	18.2675	28.5324	4.19651	UP	AT1G51890.1	Leucine-rich repeat protein kinase family protein
contig7718	20.3612	15.9581	62.3002	26.777	UP	AT1G72280.1	endoplasmic reticulum oxidoreductins 1
contig14895	5.86028	8.93359	17.9261	4.15762	UP
contig17256	10.5175	11.6282	32.1452	3.9375	UP	AT5G51440.1	HSP20-like chaperones superfamily protein
contig16666	4.93116	8.6735	15.0501	5.69302	UP
contig4330	8.85178	19.2667	27.0039	5.69571	UP
contig48682	6.02159	18.6759	18.3261	9.24482	UP	AT2G45570.1	cytochrome P450 family 76 subfamily C polypeptide 2
contig14733	5.72968	13.2631	17.4267	3.52275	UP	AT5G39110.1	RmlC-like cupins superfamily protein
contig22130	7.08977	6.77262	21.5494	17.8016	UP	AT5G18790.1	Ribosomal protein L33 family protein
contig574	89.2154	141.409	271.02	71.5444	UP	AT1G72330.3	alanine aminotransferase 2
contig81297	12.0966	15.414	36.7162	2.95844	UP
contig5484	8.38248	15.9599	25.4383	5.56924	UP	AT4G10540.1	Subtilase family protein
contig33654	20.5103	42.532	62.1662	11.7551	UP	AT5G39120.1	RmlC-like cupins superfamily protein
contig14740	15.7049	26.8956	47.5864	8.77889	UP	AT4G37520.1	Peroxidase superfamily protein
contig25445	10.8317	33.5186	32.7161	23.9768	UP
contig5896	9.2351	29.0668	27.8673	15.3638	UP
contig16624	5.49348	4.61392	16.5626	5.23388	UP	AT5G20280.1	sucrose phosphate synthase 1F
contig28763	21.596	51.8219	65.0269	27.1394	UP	AT5G36250.1	Protein phosphatase 2C family protein
contig27283	13.8866	36.6486	41.785	11.0285	UP
contig1358	8.30585	11.6849	24.915	7.63642	UP	AT1G78900.1	vacuolar ATP synthase subunit A
contig10535	49.1738	35.0456	147.371	88.2975	UP	AT3G53620.1	pyrophosphorylase 4
contig50555	6.77305	21.2953	20.2957	7.55784	UP	AT1G63440.1	heavy metal atpase 5
contig36220	7.95628	32.7857	23.8234	10.566	UP	AT1G05260.1	Peroxidase superfamily protein
contig3177	30.7612	60.7139	92.0032	28.6046	UP	AT3G47340.1	glutamine-dependent asparagine synthase 1
contig29689	13.5012	18.8048	40.3343	22.9636	UP	AT3G21420.1	2-oxoglutarate (2OG) and Fe(II)-dependent oxygenase superfamily protein
contig35820	7.33565	13.9623	21.9108	8.72149	UP	AT3G24503.1	aldehyde dehydrogenase 2C4
contig6630	23.6785	101.929	70.6186	17.6526	UP	AT1G68020.2	UDP-Glycosyltransferase / trehalose-phosphatase family protein
contig70712	8.01438	16.7948	23.8808	17.5974	UP	AT4G01630.1	expansin A17
contig3656	22.3263	29.7626	66.503	34.5297	UP	AT5G17330.1	glutamate decarboxylase
contig74967	17.471	23.1875	51.9926	19.7291	UP
contig37795	15.7301	5.13913	46.8068	9.73006	UP
contig28333	5.37475	5.81968	15.9928	7.13746	UP	AT4G21100.1	damaged DNA binding protein 1B
contig60789	11.2732	14.9078	33.5413	8.23462	UP	AT5G10930.1	CBL-interacting protein kinase 5
contig1127	80.0938	46.6116	238.099	98.0428	UP
contig16537	9.73619	25.8121	28.908	8.46432	UP	AT3G02050.1	K+ uptake transporter 3
contig8897	54.8007	225.148	162.681	143.568	UP
contig69499	11.3584	25.6319	33.7029	9.2651	UP	AT5G39110.1	RmlC-like cupins superfamily protein
contig13685	20.8742	36.4438	61.9097	22.5529	UP
contig18774	31.1469	79.7874	92.2979	42.9507	UP	AT5G24180.1	Lipase class 3-related protein
contig20771	8.64574	12.6285	25.6008	13.6654	UP
contig14542	14.3902	19.2712	42.5717	20.1822	UP	AT5G44030.1	cellulose synthase A4
contig30949	6.29928	10.0035	18.6149	6.35413	UP
contig48814	8.65187	20.7307	25.5488	5.48943	UP
contig57989	5.36982	3.73729	15.846	3.58232	UP	AT4G17670.1	Protein of unknown function (DUF581)
contig129178	10.4098	18.0518	30.662	18.2266	UP
contig18945	21.7929	26.7356	64.165	36.2643	UP	AT2G02220.1	phytosulfokin receptor 1
contig18526	7.44022	11.1488	21.8908	4.81964	UP	AT5G45910.1	GDSL-like Lipase/Acylhydrolase superfamily protein
contig17547	7.16596	7.20591	21.0233	5.64694	UP	AT5G64120.1	Peroxidase superfamily protein
contig41574	14.357	37.172	42.0579	12.3333	UP	AT2G37040.1	PHE ammonia lyase 1
contig44899	10.7979	22.4711	31.6269	5.46385	UP	AT3G09220.1	laccase 7
contig31738	7.12474	13.6323	20.8621	4.86217	UP	AT5G17820.1	Peroxidase superfamily protein
contig57470	5.23385	9.85339	15.2775	4.37557	UP
contig101335	6.07081	9.04141	17.6107	6.74719	UP	AT1G78050.1	phosphoglycerate/bisphosphoglycerate mutase
contig17665	7.21763	3.12039	20.9282	6.46185	UP	AT3G14690.1	cytochrome P450 family 72 subfamily A polypeptide 15
contig23004	6.49413	17.1971	18.8301	10.659	UP
contig12032	11.1554	24.8471	32.3399	10.4801	UP	AT4G33010.1	glycine decarboxylase P-protein 1
contig4915	192.384	387.087	556.488	140.163	UP	AT5G19140.1	Aluminium induced protein with YGL and LRDR motifs
contig25649	75.4228	195.453	218.127	79.6777	UP	AT3G49340.1	Cysteine proteinases superfamily protein
contig17669	18.0667	42.6049	52.2423	13.5379	UP	AT5G54770.1	thiazole biosynthetic enzyme chloroplast (ARA6) (THI1) (THI4)
contig10965	20.31	39.6068	58.7203	14.5005	UP
contig7301	58.5042	89.8581	168.965	72.5386	UP	AT2G40890.1	cytochrome P450 family 98 subfamily A polypeptide 3
contig77453	10.5228	12.7265	30.2824	14.2511	UP	AT1G35910.1	Haloacid dehalogenase-like hydrolase (HAD) superfamily protein
contig3815	6.37024	7.31059	18.3191	10.3582	UP	AT2G02160.1	CCCH-type zinc finger family protein
contig7848	90.4879	181.799	259.657	58.5751	UP	AT5G19140.1	Aluminium induced protein with YGL and LRDR motifs
contig18187	11.3947	9.96464	32.6162	3.11555	UP	AT2G36770.1	UDP-Glycosyltransferase superfamily protein
contig13570	55.8274	50.1772	159.73	85.337	UP
contig19944	27.1414	64.24	77.6373	55.7832	UP	AT1G61800.1	glucose-6-phosphate/phosphate translocator 2
contig9381	15.3098	27.4188	43.7751	13.7133	UP	AT4G31860.1	Protein phosphatase 2C family protein
contig24978	19.5088	30.231	55.667	60.497	UP
contig16579	41.2214	91.1688	117.551	44.1075	UP	AT4G34970.1	actin depolymerizing factor 9
contig40560	6.22982	64.1285	17.7609	11.3423	UP	AT1G63440.1	heavy metal atpase 5
contig1778	13.0045	33.1641	37.0487	16.6903	UP	AT4G02600.1	Seven transmembrane MLO family protein
contig35852	10.7343	19.4206	30.5631	8.38391	UP	AT1G69800.2	Cystathionine beta-synthase (CBS) protein
contig1110	9.74503	11.8072	27.7331	6.98774	UP	AT3G16560.1	Protein phosphatase 2C family protein
contig61414	9.09884	36.5052	25.8873	49.5712	UP
contig167276	20.6711	25.7007	58.6354	11.0935	UP	AT3G16770.1	ethylene-responsive element binding protein
contig13158	10.434	22.2308	29.5771	7.6403	UP	AT1G15520.1	pleiotropic drug resistance 12
contig57860	8.23136	10.2512	23.3267	7.49587	UP	AT1G64530.1	Plant regulator RWP-RK family protein
contig11507	240.729	779.192	681.949	282.945	UP	AT1G20850.1	xylem cysteine peptidase 2
contig155843	5.65908	4.33905	16.0309	12.0442	UP	AT1G55910.1	zinc transporter 11 precursor
contig16832	6.9805	10.6294	19.764	14.8426	UP	AT4G04570.1	cysteine-rich RLK (RECEPTOR-like protein kinase) 40
contig39144	5.89217	18.3023	16.6808	5.23054	UP	AT1G79620.1	Leucine-rich repeat protein kinase family protein
contig11153	16.121	22.0767	45.5982	15.1848	UP	AT2G22125.1	binding
contig9522	17.7781	17.0356	50.2818	34.8607	UP	AT4G18780.1	cellulose synthase family protein
contig19919	13.591	31.4002	38.3915	12.169	UP	AT2G19860.1	hexokinase 2
contig36330	6.22929	13.0045	17.5904	11.9116	UP	AT3G10340.1	phenylalanine ammonia-lyase 4
contig14429	8.1705	16.3391	23.0703	10.7856	UP	AT5G15140.1	Galactose mutarotase-like superfamily protein
contig24522	12.3876	19.5587	34.9395	11.6353	UP
contig21594	5.71836	8.8065	16.0873	6.7055	UP	AT2G46550.1	unknown protein; BEST Arabidopsis thaliana protein match is: unknown protein (TAIR:AT1G01240.3); Has 72 Blast hits to 68 proteins in 13 species: Archae - 0; Bacteria - 0; Metazoa - 1; Fungi - 0; Plants - 71; Viruses - 0; Other Eukaryotes - 0 (source: NCBI BLink).
contig62940	8.77997	8.0209	24.6342	14.0755	UP	AT1G72820.1	Mitochondrial substrate carrier family protein
contig33371	14.1362	26.2066	39.6593	14.7083	UP	AT2G03500.1	Homeodomain-like superfamily protein
contig39332	9.74506	13.6135	27.3343	4.55515	UP	AT2G16120.1	polyol/monosaccharide transporter 1
contig2308	6.07592	5.41666	17.0238	3.22601	UP	AT3G14690.1	cytochrome P450 family 72 subfamily A polypeptide 15
contig34236	17.0445	36.5196	47.6107	23.5721	UP
contig42233	8.93917	9.44388	24.9672	3.13085	UP	AT1G77330.1	2-oxoglutarate (2OG) and Fe(II)-dependent oxygenase superfamily protein
contig37655	6.97536	11.576	19.4712	5.61588	UP	AT5G18130.1	unknown protein; BEST Arabidopsis thaliana protein match is: unknown protein (TAIR:AT3G03870.2); Has 1807 Blast hits to 1807 proteins in 277 species: Archae - 0; Bacteria - 0; Metazoa - 736; Fungi - 347; Plants - 385; Viruses - 0; Other Eukaryotes - 339 (source: NCBI BLink).
contig7385	15.0961	35.7405	42.1186	11.2321	UP	AT4G37530.1	Peroxidase superfamily protein
contig26800	6.82056	22.09	19.0273	7.33278	UP
contig6142	14.8773	18.956	41.4969	11.8031	UP	AT3G47730.1	ATP-binding cassette A2
contig78916	9.4318	12.9193	26.2934	7.01784	UP
contig10088	17.228	22.5009	47.9554	12.0355	UP	AT2G16400.1	BEL1-like homeodomain 7
contig38627	23.3591	43.455	64.9419	32.2594	UP	AT4G17260.1	Lactate/malate dehydrogenase family protein
contig3341	53.4081	69.7432	148.439	50.0013	UP	AT5G08570.1	Pyruvate kinase family protein
contig5089	13.8363	25.7967	38.3932	6.21607	UP	AT3G14690.1	cytochrome P450 family 72 subfamily A polypeptide 15
contig23060	18.7079	52.5196	51.9005	33.7448	UP
contig26796	35.7969	73.4118	98.9792	37.9506	UP	AT4G34970.1	actin depolymerizing factor 9
contig8962	15.5096	529.254	42.8688	232.342	UP	AT5G14780.1	formate dehydrogenase
contig13699	9.42119	15.2767	26.0268	10.969	UP	AT1G20160.1	Subtilisin-like serine endopeptidase family protein
contig39919	60.2492	75.167	166.218	64.8202	UP	AT4G12470.1	azelaic acid induced 1
contig732	13.0239	27.7287	35.9145	15.3905	UP
contig49641	7.00435	10.9068	19.3129	2.98456	UP	AT4G29990.1	Leucine-rich repeat transmembrane protein kinase protein
contig26885	8.98011	20.2248	24.7454	11.8785	UP	AT5G07990.1	Cytochrome P450 superfamily protein
contig18375	23.4872	653.317	64.6224	385.96	UP	AT5G56080.1	nicotianamine synthase 2
contig17941	28.3279	34.2422	77.8461	44.6837	UP	AT5G17420.1	Cellulose synthase family protein
contig15810	9.21198	6.05164	25.2636	2.93719	UP	AT3G47420.1	phosphate starvation-induced gene 3
contig14318	6.44222	18.1591	17.6582	8.87966	UP
contig35003	6.30813	12.5306	17.2873	10.5576	UP	AT3G23640.1	heteroglycan glucosidase 1
contig46756	6.95821	12.4516	19.0674	8.48056	UP	AT2G16720.1	myb domain protein 7
contig6926	27.6346	31.7578	75.6203	112.655	UP
contig6731	88.6475	54.667	242.556	67.5364	UP
contig61290	7.82465	17.5244	21.4016	6.89856	UP	AT5G19400.1	Telomerase activating protein Est1
contig39901	5.50363	10.6893	15.0379	6.49813	UP	AT3G59340.1	Eukaryotic protein of unknown function (DUF914)
contig76573	6.12663	5.8607	16.7379	15.1029	UP	AT4G32940.1	gamma vacuolar processing enzyme
contig21453	11.1499	22.1383	30.4369	11.3192	UP	AT1G21450.1	SCARECROW-like 1
contig10732	26.076	59.9863	71.1525	59.4132	UP	AT4G02600.1	Seven transmembrane MLO family protein
contig32134	8.15931	7.26915	22.262	12.3145	UP	AT1G72820.1	Mitochondrial substrate carrier family protein
contig13840	34.3041	84.0135	93.5487	27.5545	UP	AT5G62740.1	SPFH/Band 7/PHB domain-containing membrane-associated protein family
contig42331	9.27005	12.1416	25.2542	10.9695	UP	AT5G65640.1	beta HLH protein 93
contig76879	6.7063	12.1312	18.2434	7.52711	UP	AT5G10100.1	Haloacid dehalogenase-like hydrolase (HAD) superfamily protein
contig36660	6.70887	10.8679	18.2297	6.914	UP	AT1G19740.1	ATP-dependent protease La (LON) domain protein
contig8238	71.2955	101.67	193.543	62.5421	UP	AT3G05500.1	Rubber elongation factor protein (REF)
contig21120	15.3012	11.3374	41.5231	20.5545	UP	AT2G38905.1	Low temperature and salt responsive protein family
contig38303	9.20413	10.5555	24.9736	15.9057	UP	AT4G36220.1	ferulic acid 5-hydroxylase 1
contig45341	7.96599	12.6364	21.6141	4.46299	UP	AT4G17500.1	ethylene responsive element binding factor 1
contig55346	13.3759	14.3675	36.2815	23.2882	UP	AT5G54800.1	glucose 6-phosphate/phosphate translocator 1
contig66637	8.5785	22.4018	23.2644	11.1864	UP	AT5G05340.1	Peroxidase superfamily protein
contig15067	5.97385	9.77022	16.1701	4.18091	UP
contig36941	36.5092	44.378	98.7304	46.9476	UP	AT5G48485.1	Bifunctional inhibitor/lipid-transfer protein/seed storage 2S albumin superfamily protein
contig13858	50.5527	100.6	136.676	98.4173	UP
contig2654	35.262	57.4885	95.2724	33.0235	UP	AT1G76550.1	Phosphofructokinase family protein
contig27205	11.121	15.9023	30.043	10.1007	UP
contig15068	9.79727	14.4915	26.453	6.49709	UP
contig8734	14.7629	49.0694	39.8595	43.3561	UP	AT1G10970.1	zinc transporter 4 precursor
contig55343	8.30432	12.0133	22.3251	10.2427	UP	AT3G59690.1	IQ-domain 13
contig17219	39.1646	55.5403	105.248	57.4358	UP	AT1G11680.1	CYTOCHROME P450 51G1
contig44079	6.47654	5.26863	17.3983	6.17453	UP	AT5G20400.1	2-oxoglutarate (2OG) and Fe(II)-dependent oxygenase superfamily protein
contig15020	25.4288	29.9303	68.3056	85.3894	UP
contig24842	35.5774	64.7853	95.5632	43.6834	UP	AT2G47710.1	Adenine nucleotide alpha hydrolases-like superfamily protein
contig10249	91.2949	136.11	245.145	78.7878	UP	AT2G41430.1	dehydration-induced protein (ERD15)
contig957	7.06842	8.52733	18.9674	9.90955	UP	AT3G25690.1	Hydroxyproline-rich glycoprotein family protein
contig63238	8.87948	15.1744	23.8209	8.20726	UP	AT2G38410.1	ENTH/VHS/GAT family protein
contig6980	11.6055	42.4612	31.1264	12.9781	UP	AT2G18700.1	trehalose phosphatase/synthase 11
contig48784	11.7097	7.03894	31.3887	24.6174	UP
contig25381	7.29687	12.1146	19.5286	18.0275	UP
contig33317	5.77577	10.6961	15.4436	4.7872	UP
contig23527	9.90227	21.1287	26.4722	13.9631	UP
contig57964	9.10822	23.5926	24.3424	23.0418	UP
contig134059	6.51768	11.2191	17.4167	21.8579	UP
contig5879	11.5361	15.1191	30.8198	8.25412	UP	AT4G35470.1	plant intracellular ras group-related LRR 4
contig152241	6.94012	13.8471	18.5255	3.19869	UP
contig5911	6.39544	6.93714	17.0704	6.22838	UP	AT1G55020.1	lipoxygenase 1
contig97566	5.6603	8.06166	15.088	3.60808	UP
contig154609	8.08317	15.6483	21.5453	3.98605	UP	AT5G59670.1	Leucine-rich repeat protein kinase family protein
contig8113	68.948	217.006	183.609	104.945	UP	AT4G27450.1	Aluminium induced protein with YGL and LRDR motifs
contig11787	9.06103	16.6575	24.1187	9.60966	UP	AT4G13510.1	ammonium transporter 1;1
contig8206	74.0937	168.853	197.127	78.6699	UP	AT4G23850.1	AMP-dependent synthetase and ligase family protein
contig15410	12.0546	18.4664	32.0211	13.7899	UP	AT2G19810.1	CCCH-type zinc finger family protein
contig76810	9.46206	16.9217	25.1256	5.56411	UP	AT1G77760.1	nitrate reductase 1
contig41318	6.63352	4.43653	17.5984	15.4846	UP
contig1613	12.1192	26.7916	32.132	12.1995	UP	AT3G47340.1	glutamine-dependent asparagine synthase 1
contig35793	23.0085	25.8608	60.978	22.5343	UP	AT4G32690.1	hemoglobin 3
contig120996	5.89388	5.66505	15.5993	5.85044	UP
contig13139	24.5309	49.8922	64.918	21.8672	UP	AT3G12630.1	A20/AN1-like zinc finger family protein
contig14680	8.60771	7.94881	22.7776	7.29596	UP	AT1G76140.1	Prolyl oligopeptidase family protein
contig26898	10.038	38.0781	26.5581	10.4158	UP	AT5G58390.1	Peroxidase superfamily protein
contig2593	41.0374	71.4399	108.534	45.9118	UP	AT3G30390.1	Transmembrane amino acid transporter family protein
contig34341	10.0409	19.1328	26.502	12.7718	UP	AT5G22920.1	CHY-type/CTCHY-type/RING-type Zinc finger protein
contig27999	67.3077	106.506	177.557	89.9645	UP	AT4G12510.1	Bifunctional inhibitor/lipid-transfer protein/seed storage 2S albumin superfamily protein
contig10423	9.23645	11.8954	24.3435	5.76272	UP	AT3G14690.1	cytochrome P450 family 72 subfamily A polypeptide 15
contig2037	75.4571	114.133	198.8	95.5951	UP	AT1G56700.1	Peptidase C15 pyroglutamyl peptidase I-like
contig22836	6.05349	12.7915	15.9397	11.1276	UP	AT4G22590.1	Haloacid dehalogenase-like hydrolase (HAD) superfamily protein
contig3163	83.7852	210.362	220.352	64.1783	UP	AT3G53420.1	plasma membrane intrinsic protein 2A
contig27961	50.4875	96.5602	132.591	61.8576	UP	AT1G56070.1	Ribosomal protein S5/Elongation factor G/III/V family protein
contig10832	31.3421	29.1146	82.2501	49.9327	UP	AT5G22440.1	Ribosomal protein L1p/L10e family
contig11349	10.2483	14.1711	26.8939	9.48199	UP	AT5G07990.1	Cytochrome P450 superfamily protein
contig4160	10.1255	12.2979	26.57	11.0295	UP	AT2G04350.1	AMP-dependent synthetase and ligase family protein
contig167242	33.6942	51.6241	88.4158	18.96	UP	AT2G02250.1	phloem protein 2-B2
contig15598	20.2921	42.7924	53.2472	20.5701	UP	AT3G12630.1	A20/AN1-like zinc finger family protein
contig40508	6.67332	12.5966	17.4831	5.19815	UP	AT1G30440.1	Phototropic-responsive NPH3 family protein
contig37792	18.9923	56.4051	49.7482	14.1286	UP	AT1G15740.1	Leucine-rich repeat family protein
contig61681	10.2484	13.7751	26.8441	7.21372	UP	AT1G22170.1	Phosphoglycerate mutase family protein
contig127115	6.38188	3.41791	16.6881	5.45575	UP
contig17361	8.91526	12.5485	23.3119	4.95482	UP	AT5G60600.1	4-hydroxy-3-methylbut-2-enyl diphosphate synthase
contig2781	11.9595	13.656	31.2239	21.9633	UP	AT5G22850.1	Eukaryotic aspartyl protease family protein
contig39848	28.2952	35.5903	73.8715	27.8844	UP	AT1G11530.1	C-terminal cysteine residue is changed to a serine 1
contig43596	6.20049	7.41761	16.1808	6.99737	UP	AT4G34260.1	1 2-alpha-L-fucosidases
contig33918	41.7876	93.7745	108.964	67.9826	UP	AT5G05340.1	Peroxidase superfamily protein
contig53865	21.1539	50.2297	55.0678	12.7547	UP	AT5G45540.1	Protein of unknown function (DUF594)
contig50585	12.6708	17.4977	32.9551	15.8511	UP	AT5G44030.1	cellulose synthase A4
contig44101	6.57607	11.7639	17.0822	4.8443	UP	AT1G01830.2	ARM repeat superfamily protein
contig15802	10.2602	11.7151	26.6444	10.2965	UP	AT2G02790.1	IQ-domain 29
contig20271	14.3839	27.6916	37.3096	13.2238	UP	AT1G06410.1	trehalose-phosphatase/synthase 7
contig14014	9.85479	15.3302	25.549	3.35892	UP	AT4G13420.1	high affinity K+ transporter 5
contig7474	7.73776	11.0127	20.0492	6.9944	UP	AT3G15630.1	unknown protein; FUNCTIONS IN: molecular_function unknown; INVOLVED IN: biological_process unknown; LOCATED IN: chloroplast; EXPRESSED IN: 24 plant structures; EXPRESSED DURING: 15 growth stages; BEST Arabidopsis thaliana protein match is: unknown protein (TAIR:AT1G52720.1); Has 61 Blast hits to 61 proteins in 13 species: Archae - 0; Bacteria - 0; Metazoa - 0; Fungi - 0; Plants - 61; Viruses - 0;…
contig38645	7.53198	11.4768	19.4807	10.8309	UP	AT1G32100.1	pinoresinol reductase 1
contig43294	14.1174	16.1637	36.4839	26.2379	UP
contig7585	8.93848	4.51348	23.096	7.20252	UP	AT4G35090.1	catalase 2
contig7602	71.1953	138.495	183.93	54.9623	UP	AT4G30190.2	H(+)-ATPase 2
contig12316	14.8261	34.8335	38.2946	7.8668	UP	AT2G16050.1	Cysteine/Histidine-rich C1 domain family protein
contig29581	13.1469	6.3899	33.954	36.2203	UP
contig36068	7.93176	13.5169	20.4794	7.02827	UP	AT3G42050.1	vacuolar ATP synthase subunit H family protein
contig21350	7.83036	9.81988	20.2069	14.7133	UP	AT2G17290.1	Calcium-dependent protein kinase family protein
contig60142	6.73887	10.6799	17.3862	4.773	UP	AT3G59910.1	Ankyrin repeat family protein
contig38897	11.3298	14.9632	29.2087	9.30863	UP	AT5G40850.1	urophorphyrin methylase 1
contig167376	8.06635	19.7794	20.7802	2.57141	UP	AT5G04380.1	S-adenosyl-L-methionine-dependent methyltransferases superfamily protein
contig58676	8.92463	11.5468	22.9862	26.0125	UP	AT5G03230.1	Protein of unknown function DUF584
contig53406	5.98306	6.21497	15.4055	6.76535	UP	AT2G37460.1	nodulin MtN21 /EamA-like transporter family protein
contig10301	98.984	159.598	254.8	112.728	UP	AT4G00430.1	plasma membrane intrinsic protein 1;4
contig40561	10.0449	54.2832	25.8543	12.381	UP	AT1G63440.1	heavy metal atpase 5
contig920	273.009	612.619	702.463	265.44	UP	AT3G10340.1	phenylalanine ammonia-lyase 4
contig28273	44.5407	85.9099	114.493	41.3767	UP	AT5G62700.1	tubulin beta chain 3
contig54880	6.40926	11.1841	16.4699	4.16811	UP	AT1G26830.1	cullin 3
contig38442	11.501	30.3205	29.4973	25.2642	UP
contig18599	9.19052	11.6922	23.5519	8.01215	UP	AT1G12110.1	nitrate transporter 1.1
contig12748	79.2765	102.561	203.094	103.79	UP	AT4G05390.1	root FNR 1
contig980	57.7026	79.273	147.54	50.8792	UP	AT2G36460.1	Aldolase superfamily protein
contig46076	13.1028	18.4344	33.4706	14.7068	UP	AT4G07960.1	Cellulose-synthase-like C12
contig27857	31.0143	33.0728	79.1522	29.4835	UP	AT4G24730.1	Calcineurin-like metallo-phosphoesterase superfamily protein
contig21926	8.89216	8.55975	22.689	18.3937	UP	AT4G12080.1	AT-hook motif nuclear-localized protein 1
contig2361	70.6045	82.5806	179.968	59.3255	UP	AT1G19180.1	jasmonate-zim-domain protein 1
contig22634	7.32159	9.69514	18.6065	6.04366	UP	AT1G21380.1	Target of Myb protein 1
contig12139	7.40137	53.2973	18.7858	13.0719	UP	AT5G05340.1	Peroxidase superfamily protein
contig24649	12.4466	18.6703	31.5844	19.4105	UP	AT3G01190.1	Peroxidase superfamily protein
contig47435	7.1455	16.7629	18.126	13.5501	UP
contig9903	12.1218	23.5992	30.7067	11.4685	UP	AT1G21450.1	SCARECROW-like 1
contig17454	17.802	46.4749	45.0716	11.3782	UP	AT1G62660.1	Glycosyl hydrolases family 32 protein
contig42421	7.1953	6.04071	18.2101	24.4696	UP
contig2663	282.696	625.566	715.214	275.245	UP	AT3G10340.1	phenylalanine ammonia-lyase 4
contig37225	15.0208	15.3535	37.997	10.4689	UP	AT5G05340.1	Peroxidase superfamily protein
contig39318	8.8305	23.5031	22.335	11.7104	UP	AT3G01190.1	Peroxidase superfamily protein
contig59339	5.95394	6.95921	15.039	5.24631	UP	AT3G26300.1	cytochrome P450 family 71 subfamily B polypeptide 34
contig6318	6.11164	11.6182	15.4354	6.37289	UP	AT1G56130.1	Leucine-rich repeat transmembrane protein kinase
contig12444	82.4783	105.394	208.185	106.272	UP	AT3G48350.1	Cysteine proteinases superfamily protein
contig38031	8.72325	15.8023	21.9903	5.98118	UP	AT5G36250.1	Protein phosphatase 2C family protein
contig8960	10.4955	30.3269	26.4578	12.2898	UP	AT2G18700.1	trehalose phosphatase/synthase 11
contig38456	8.21337	13.2295	20.6967	5.56392	UP
contig7457	38.419	65.5417	96.8056	32.9905	UP	AT5G07475.1	Cupredoxin superfamily protein
contig34519	15.3046	31.513	38.5531	11.7882	UP	AT3G23430.1	phosphate 1
contig51548	6.05798	1.34985	15.2455	5.48035	UP
contig9088	10.1833	19.1935	25.6183	9.01397	UP
contig4433	39.9428	66.1352	100.454	25.3124	UP	AT5G03340.1	ATPase AAA-type CDC48 protein
contig705	63.1458	110.297	158.669	56.1198	UP	AT3G09840.1	cell division cycle 48
contig22127	6.99556	14.9973	17.5726	7.72713	UP	AT5G51060.1	NADPH/respiratory burst oxidase protein D
contig14671	13.929	21.503	34.9878	11.4315	UP	AT5G65750.1	2-oxoglutarate dehydrogenase E1 component
contig35560	22.7922	37.3317	57.2405	33.329	UP	AT5G28770.2	bZIP transcription factor family protein
contig5767	8.13622	10.5731	20.4252	4.96693	UP	AT1G44800.1	nodulin MtN21 /EamA-like transporter family protein
contig113890	8.3836	3.11583	21.045	1.08044	UP	AT1G74310.1	heat shock protein 101
contig33136	52.2713	86.2269	131.104	25.8225	UP	AT3G55440.1	triosephosphate isomerase
contig25635	7.32555	15.9622	18.3674	8.09362	UP	AT2G37710.1	receptor lectin kinase
contig36649	7.80619	482.694	19.5683	183.501	UP
contig24471	7.20914	15.7334	18.0565	3.63518	UP	AT1G14870.1	PLANT CADMIUM RESISTANCE 2
contig26331	13.666	11.6095	34.2153	7.70764	UP	AT3G53990.1	Adenine nucleotide alpha hydrolases-like superfamily protein
contig44479	6.89702	11.9054	17.2587	9.08933	UP
contig21071	36.0066	25.1043	90.083	96.9302	UP	AT1G32210.1	Defender against death (DAD family) protein
contig706	45.3973	62.5604	113.346	56.8117	UP	AT1G11680.1	CYTOCHROME P450 51G1
contig56128	9.54689	8.78541	23.8292	8.547	UP
contig77123	7.24057	8.32657	18.0505	8.75954	UP	AT3G52450.1	plant U-box 22
contig43065	8.31085	10.916	20.6836	8.67077	UP	AT4G14580.1	CBL-interacting protein kinase 4
contig2878	72.3269	142.525	179.968	51.8413	UP	AT4G30190.2	H(+)-ATPase 2
contig16648	33.9669	74.3973	84.2297	55.9993	UP
contig42982	7.64952	7.18845	18.9586	10.3687	UP
contig1219	6.11258	6.11402	15.1209	6.70486	UP	AT3G26300.1	cytochrome P450 family 71 subfamily B polypeptide 34
contig69143	33.647	62.3466	83.2228	52.7483	UP	AT3G15630.1	unknown protein; FUNCTIONS IN: molecular_function unknown; INVOLVED IN: biological_process unknown; LOCATED IN: chloroplast; EXPRESSED IN: 24 plant structures; EXPRESSED DURING: 15 growth stages; BEST Arabidopsis thaliana protein match is: unknown protein (TAIR:AT1G52720.1); Has 61 Blast hits to 61 proteins in 13 species: Archae - 0; Bacteria - 0; Metazoa - 0; Fungi - 0; Plants - 61; Viruses - 0;…
contig33909	7.72422	14.6051	19.0974	6.3847	UP
contig35	15.7418	21.9337	38.9154	13.3134	UP	AT3G47730.1	ATP-binding cassette A2
contig4432	37.8162	59.9384	93.4539	23.8906	UP	AT5G03340.1	ATPase AAA-type CDC48 protein
contig5222	14.3554	37.5543	35.4483	29.6227	UP
contig40379	10.8294	19.7764	26.7402	7.54188	UP	AT3G14940.1	phosphoenolpyruvate carboxylase 3
contig57664	8.93461	12.1587	22.0609	6.37813	UP
contig14874	6.16235	14.964	15.2053	5.66301	UP	AT3G02050.1	K+ uptake transporter 3
contig22126	12.5925	20.7024	31.0692	11.8845	UP	AT5G47910.1	respiratory burst oxidase homologue D
contig45855	11.4319	21.0307	28.1796	17.2985	UP	AT5G47390.1	myb-like transcription factor family protein
contig5177	22.9459	45.3012	56.494	13.4869	UP	AT5G47040.1	lon protease 2
contig57169	13.0373	27.5541	32.0573	6.53393	UP	AT3G53260.1	phenylalanine ammonia-lyase 2
contig37406	6.45581	13.7547	15.8726	6.32165	UP
contig4586	15.734	18.647	38.6835	11.6253	UP	AT4G34610.1	BEL1-like homeodomain 6
contig24192	14.3812	29.0552	35.3311	6.26	UP	AT2G38940.1	phosphate transporter 1;4
contig29230	8.4809	16.9056	20.8265	9.36371	UP	AT5G07070.1	CBL-interacting protein kinase 2
contig72660	6.18651	12.6831	15.1786	4.37774	UP
contig14907	12.5415	21.3902	30.71	8.55319	UP	AT5G11940.1	Subtilase family protein
contig3061	28.9196	22.6252	70.7877	17.7126	UP	AT1G44800.1	nodulin MtN21 /EamA-like transporter family protein
contig16520	13.9472	23.9107	34.1323	14.9756	UP	AT3G24503.1	aldehyde dehydrogenase 2C4
contig25414	91.0974	158.453	222.854	47.0193	UP
contig30118	58.2996	99.3306	142.368	48.3453	UP	AT1G70410.2	beta carbonic anhydrase 4
contig159012	12.1842	30.7181	29.7483	9.58514	UP	AT2G37040.1	PHE ammonia lyase 1
contig18675	37.5755	64.2305	91.7327	34.0121	UP	AT5G06460.1	ubiquitin activating enzyme 2
contig28778	8.73539	10.991	21.32	7.94126	UP	AT1G71360.1	Galactose-binding protein
contig2184	22.811	30.4536	55.6722	18.7506	UP	AT1G07510.1	FTSH protease 10
contig870	13.23	7.12809	32.263	11.3442	UP	AT5G64700.1	nodulin MtN21 /EamA-like transporter family protein
contig47102	13.909	28.8678	33.9038	15.1351	UP	AT5G47910.1	respiratory burst oxidase homologue D
contig31407	29.3017	45.2401	71.3835	38.2545	UP	AT2G15620.1	nitrite reductase 1
contig6632	8.6334	6.82939	21.0195	20.5068	UP
contig29605	7.53159	6.61114	18.3342	20.5421	UP	AT5G57540.1	xyloglucan endotransglucosylase/hydrolase 13
contig15706	81.6606	108.009	198.646	113.598	UP
contig28206	9.99388	15.6035	24.2848	9.88817	UP
contig9558	10.1977	20.6392	24.7647	6.45852	UP	AT5G50760.1	SAUR-like auxin-responsive protein family
contig14342	63.2391	103.055	153.41	66.9486	UP	AT1G78290.2	Protein kinase superfamily protein
contig3259	37.5857	91.7852	91.1449	50.3387	UP	AT5G05340.1	Peroxidase superfamily protein
contig25566	26.1024	53.7182	63.2962	42.1275	UP	AT4G02600.1	Seven transmembrane MLO family protein
contig14099	9.40739	11.3703	22.7869	4.54392	UP	AT2G21520.2	Sec14p-like phosphatidylinositol transfer family protein
contig28450	8.38707	10.6017	20.3102	11.4958	UP	AT1G21920.1	Histone H3 K4-specific methyltransferase SET7/9 family protein
contig47028	11.683	14.5685	28.2732	13.5487	UP	AT3G19420.1	PTEN 2
contig20175	26.0787	36.6337	62.9585	32.1065	UP	AT1G76490.1	hydroxy methylglutaryl CoA reductase 1
contig104828	6.33625	7.74045	15.2965	8.63231	UP
contig30723	7.63125	12.6879	18.413	7.16104	UP	AT1G30360.1	Early-responsive to dehydration stress protein (ERD4)
contig156962	8.25262	9.95713	19.9112	6.12299	UP
contig35148	9.87474	15.7213	23.8184	9.43103	UP	AT3G24503.1	aldehyde dehydrogenase 2C4
contig2838	35.3508	59.0028	85.1978	26.9196	UP	AT4G35160.1	O-methyltransferase family protein
contig55583	6.47257	7.30971	15.5957	7.9778	UP	AT4G32060.1	calcium-binding EF hand family protein
contig3120	27.4322	55.3957	66.0843	21.711	UP	AT1G44170.1	aldehyde dehydrogenase 3H1
contig10164	6.69686	10.3051	16.1318	5.63781	UP	AT3G48050.1	BAH domain ;TFIIS helical bundle-like domain
contig43953	8.60122	16.0399	20.6824	9.29176	UP	AT5G13030.1	unknown protein; FUNCTIONS IN: molecular_function unknown; INVOLVED IN: biological_process unknown; LOCATED IN: chloroplast; EXPRESSED IN: 23 plant structures; EXPRESSED DURING: 13 growth stages; CONTAINS InterPro DOMAIN/s: Uncharacterised protein family UPF0061 (InterPro:IPR003846); Has 5046 Blast hits to 4997 proteins in 1211 species: Archae - 8; Bacteria - 2327; Metazoa - 120; Fungi - 134; Pla…
contig45544	10.2495	24.6112	24.6037	19.124	UP	AT3G49340.1	Cysteine proteinases superfamily protein
contig40960	6.43058	6.63878	15.4362	8.50775	UP	AT2G42280.1	basic helix-loop-helix (bHLH) DNA-binding superfamily protein
contig51344	33.9651	41.3338	81.4374	38.9033	UP	AT5G63500.1	Protein of unknown function (DUF 3339)
contig42358	8.45343	14.8565	20.2576	8.05553	UP	AT5G17010.1	Major facilitator superfamily protein
contig25039	15.7658	20.4867	37.7731	10.0105	UP
contig10109	130.135	210.946	311.436	153.724	UP	AT5G17920.1	Cobalamin-independent synthase family protein
contig8903	17.8298	417.453	42.6598	193.107	UP	AT5G14780.1	formate dehydrogenase
contig13334	10.8039	19.5393	25.8456	10.8418	UP	AT1G13640.1	Phosphatidylinositol 3- and 4-kinase family protein
contig39208	8.39856	13.3241	20.0849	8.01962	UP
contig7406	17.788	23.7145	42.5384	18.874	UP	AT4G32410.1	cellulose synthase 1
contig52550	50.7916	70.8188	121.348	50.3812	UP
contig6434	226.355	432.421	540.656	171.556	UP	AT2G18960.1	H(+)-ATPase 1
contig5348	8.09652	17.2751	19.3376	8.52305	UP	AT1G56130.1	Leucine-rich repeat transmembrane protein kinase
contig164359	8.04837	11.9739	19.2199	4.31042	UP	AT2G01900.1	DNAse I-like superfamily protein
contig25059	10.4061	5.82635	24.8364	18.1989	UP	AT5G64170.2	dentin sialophosphoprotein-related
contig7953	37.4207	59.9557	89.306	26.832	UP	AT5G42050.1	DCD (Development and Cell Death) domain protein
contig70409	7.49507	12.0098	17.874	12.2168	UP
contig20675	54.1227	105.628	129.022	44.0544	UP	AT5G17330.1	glutamate decarboxylase
contig13803	7.34703	15.6472	17.4978	4.932	UP	AT3G51630.1	with no lysine (K) kinase 5
contig4013	60.9236	189.139	145.026	91.9413	UP	AT1G48600.2	S-adenosyl-L-methionine-dependent methyltransferases superfamily protein
contig3639	6.88259	8.30615	16.3766	3.66078	UP	AT3G54420.1	homolog of carrot EP3-3 chitinase
contig6320	47.7958	66.5793	113.675	46.215	UP	AT3G05500.1	Rubber elongation factor protein (REF)
contig20164	10.6694	15.9243	25.3477	9.1407	UP	AT3G55410.1	2-oxoglutarate dehydrogenase E1 component
contig14834	14.4176	26.1737	34.2507	11.786	UP	AT4G33010.1	glycine decarboxylase P-protein 1
contig39352	7.82041	7.88727	18.5676	10.1945	UP	AT1G15710.1	prephenate dehydrogenase family protein
contig10011	11.9888	24.8194	28.45	7.50451	UP	AT2G42600.2	phosphoenolpyruvate carboxylase 2
contig3288	30.6907	36.9502	72.7491	57.4763	UP	AT3G43190.1	sucrose synthase 4
contig44318	7.70092	15.7797	18.243	7.93228	UP	AT2G40940.1	ethylene response sensor 1
contig30815	7.69623	17.0902	18.2289	3.23141	UP	AT1G03230.1	Eukaryotic aspartyl protease family protein
contig159764	6.64167	14.2059	15.7209	10.6499	UP
contig11169	102.061	166.134	241.375	112.207	UP	AT1G63940.2	monodehydroascorbate reductase 6
contig40472	7.36173	4.55193	17.3825	16.0197	UP
contig41934	15.6745	30.1523	36.9938	9.80606	UP
contig37000	14.4198	29.3313	34.0064	10.5088	UP	AT5G17540.1	HXXXD-type acyl-transferase family protein
contig51727	7.15139	10.7253	16.8651	6.64199	UP	AT5G45900.1	ThiF family protein
contig73003	10.0744	12.4155	23.7543	12.6716	UP	AT3G04610.1	RNA-binding KH domain-containing protein
contig9825	6.55292	14.8354	15.4441	10.3249	UP	AT2G17850.1	Rhodanese/Cell cycle control phosphatase superfamily protein
contig30591	7.04574	5.28775	16.5846	6.05783	UP
contig164300	8.4551	10.7292	19.9013	3.00338	UP
contig2584	132.541	291.198	311.72	122.44	UP	AT4G00430.1	plasma membrane intrinsic protein 1;4
contig4211	6.7376	12.9344	15.84	4.87923	UP	AT5G49890.1	chloride channel C
contig34685	6.99317	13.058	16.4279	8.03294	UP	AT5G10770.1	Eukaryotic aspartyl protease family protein
contig51117	50.2646	36.79	118.071	7.95071	UP	AT2G26660.1	SPX domain gene 2
contig4084	67.386	131.378	158.25	62.8039	UP	AT1G56070.1	Ribosomal protein S5/Elongation factor G/III/V family protein
contig26980	13.5268	15.7704	31.7369	15.2014	UP	AT1G58440.1	FAD/NAD(P)-binding oxidoreductase family protein
contig76453	7.35892	7.24955	17.2604	5.8433	UP
contig38010	7.37824	13.4078	17.298	8.49051	UP	AT1G04280.1	P-loop containing nucleoside triphosphate hydrolases superfamily protein
contig72327	21.5572	34.8276	50.5249	17.0925	UP	AT5G17330.1	glutamate decarboxylase
contig8419	11.0085	18.4592	25.7752	10.2418	UP	AT4G31860.1	Protein phosphatase 2C family protein
contig53651	11.5284	11.0304	26.9877	11.6431	UP
contig32101	10.6847	14.5444	25.006	10.6484	UP	AT4G34450.1	coatomer gamma-2 subunit putative / gamma-2 coat protein putative / gamma-2 COP putative
contig26424	31.5934	27.763	73.9097	18.9859	UP	AT1G11530.1	C-terminal cysteine residue is changed to a serine 1
contig68461	8.79033	12.3117	20.5614	6.99229	UP	AT3G01780.1	ARM repeat superfamily protein
contig2489	63.4335	113.908	148.243	52.4711	UP	AT5G38820.1	Transmembrane amino acid transporter family protein
contig9737	6.87357	6.60122	16.0595	4.93106	UP	AT5G07010.1	sulfotransferase 2A
contig24511	23.9887	30.087	56.0382	11.3531	UP	AT2G15220.1	Plant basic secretory protein (BSP) family protein
contig18983	6.9908	8.65866	16.3252	5.38962	UP
contig39297	10.3943	15.591	24.273	7.20992	UP	AT2G25280.1	CONTAINS InterPro DOMAIN/s: UPF0103/Mediator of ErbB2-driven cell motility (Memo) related (InterPro:IPR002737); Has 1074 Blast hits to 1072 proteins in 474 species: Archae - 213; Bacteria - 366; Metazoa - 159; Fungi - 135; Plants - 54; Viruses - 0; Other Eukaryotes - 147 (source: NCBI BLink).
contig2773	9.98094	20.9253	23.3067	8.14887	UP	AT5G05340.1	Peroxidase superfamily protein
contig5564	19.0674	22.3253	44.5052	34.0226	UP	AT4G32060.1	calcium-binding EF hand family protein
contig12439	6.91756	8.91556	16.1368	6.73131	UP	AT2G42880.1	MAP kinase 20
contig1898	20.415	60.5581	47.597	26.6384	UP	AT4G27270.1	Quinone reductase family protein
contig22852	38.9938	37.0751	90.9109	70.4607	UP
contig8233	10.0756	10.5107	23.482	3.8837	UP	AT3G09270.1	glutathione S-transferase TAU 8
contig16060	10.1319	5.38666	23.6114	2.7529	UP	AT4G16260.1	Glycosyl hydrolase superfamily protein
contig6637	184.27	228.748	429.119	143.955	UP	AT2G05710.1	aconitase 3
contig13971	306.714	546.272	713.534	291.036	UP	AT1G56070.1	Ribosomal protein S5/Elongation factor G/III/V family protein
contig41184	12.8021	14.7153	29.78	5.50244	UP	AT2G02320.1	phloem protein 2-B7
contig51213	28.9004	46.0096	67.2236	20.643	UP	AT1G02260.1	Divalent ion symporter
contig30270	10.5215	16.0722	24.4638	9.10343	UP	AT5G13140.1	Pollen Ole e 1 allergen and extensin family protein
contig19443	16.7127	32.5372	38.8467	13.3543	UP	AT5G50380.1	exocyst subunit exo70 family protein F1
contig38237	12.4102	20.8939	28.8434	8.9087	UP	AT5G22300.1	nitrilase 4
contig20832	12.5439	19.5334	29.1493	12.5115	UP	AT5G38710.1	Methylenetetrahydrofolate reductase family protein
contig173	21.9491	19.2689	50.9578	35.777	UP	AT4G18780.1	cellulose synthase family protein
contig2877	14.8216	10.6496	34.3979	9.3328	UP	AT4G11650.1	osmotin 34
contig27737	19.4311	17.4865	45.0802	31.6878	UP	AT3G05640.1	Protein phosphatase 2C family protein
contig34849	10.7181	18.0776	24.8658	8.94486	UP	AT3G14940.1	phosphoenolpyruvate carboxylase 3
contig167875	9.21598	34.0254	21.3673	11.0215	UP	AT2G36570.1	Leucine-rich repeat protein kinase family protein
contig196	6.54497	13.5587	15.165	4.06537	UP	AT5G26120.1	alpha-L-arabinofuranosidase 2
contig37499	61.0019	92.2634	141.272	66.6343	UP	AT2G26230.1	uricase / urate oxidase / nodulin 35 putative
contig3837	113.169	203.124	262.075	96.46	UP	AT2G37040.1	PHE ammonia lyase 1
contig37667	10.8514	15.6735	25.128	12.2852	UP	AT3G58760.1	Integrin-linked protein kinase family
contig147353	8.02685	12.5445	18.5574	8.6973	UP
contig833	8.45298	16.2946	19.538	5.98121	UP	AT1G66950.1	pleiotropic drug resistance 11
contig13870	6.62747	11.2046	15.3166	6.87523	UP	AT1G18980.1	RmlC-like cupins superfamily protein
contig45326	23.0929	25.8574	53.3486	27.3338	UP	AT5G09590.1	mitochondrial HSO70 2
contig1225	17.8715	19.5073	41.2681	20.8022	UP	AT5G66760.1	succinate dehydrogenase 1-1
contig48428	7.17488	8.83492	16.557	3.48364	UP	AT3G16560.1	Protein phosphatase 2C family protein
contig17771	11.8941	17.0906	27.4354	8.93094	UP	AT2G21390.1	Coatomer alpha subunit
contig45592	6.62146	10.6925	15.2719	5.12968	UP	AT2G23140.1	RING/U-box superfamily protein with ARM repeat domain
contig54316	13.0163	21.6046	30.0142	9.78707	UP	AT4G04920.1	sensitive to freezing 6
contig13634	20.1849	22.3766	46.5307	19.838	UP
contig33380	8.59542	12.0394	19.814	5.88489	UP	AT5G58380.1	SOS3-interacting protein 1
contig15843	7.0354	13.1701	16.2163	7.8533	UP	AT3G55990.1	Plant protein of unknown function (DUF828)
contig27207	16.5478	23.2147	38.1382	18.4231	UP	AT3G23280.1	XB3 ortholog 5 in Arabidopsis thaliana
contig3109	35.3712	79.0949	81.5042	43.1567	UP	AT1G11260.1	sugar transporter 1
contig17082	13.256	27.9455	30.5421	15.5988	UP	AT2G03500.1	Homeodomain-like superfamily protein
contig17426	12.6893	21.5503	29.2135	7.25396	UP	AT5G49760.1	Leucine-rich repeat protein kinase family protein
contig19678	11.1074	13.9194	25.5595	1.69788	UP	AT4G35160.1	O-methyltransferase family protein
contig29165	35.6418	74.6708	81.9498	40.0035	UP	AT5G35630.1	glutamine synthetase 2
contig26032	42.532	66.861	97.7801	18.012	UP
contig5695	145.874	191.415	335.22	157.023	UP	AT3G52990.1	Pyruvate kinase family protein
contig3707	13.8568	16.4878	31.8234	11.2138	UP	AT1G07510.1	FTSH protease 10
contig22730	40.4297	72.5657	92.7883	38.9477	UP	AT4G33010.1	glycine decarboxylase P-protein 1
contig15605	25.5685	34.7386	58.6236	30.5426	UP	AT1G24625.1	zinc finger protein 7
contig9010	19.0608	32.1542	43.6621	12.47	UP	AT3G14660.1	cytochrome P450 family 72 subfamily A polypeptide 13
contig6972	12.4341	19.1361	28.4589	11.331	UP	AT1G51760.1	peptidase M20/M25/M40 family protein
contig22883	6.75722	10.0092	15.4648	6.87587	UP	AT4G33420.1	Peroxidase superfamily protein
contig80425	7.55354	37.1658	17.2784	41.2885	UP
contig3428	50.3536	88.1835	115.102	43.2583	UP	AT3G09840.1	cell division cycle 48
contig27791	15.1216	36.2293	34.5288	14.8458	UP	AT1G74790.1	catalytics
contig33782	7.23422	8.45856	16.5156	4.72917	UP	AT1G47980.1	unknown protein; FUNCTIONS IN: molecular_function unknown; INVOLVED IN: biological_process unknown; LOCATED IN: endomembrane system; EXPRESSED IN: 6 plant structures; EXPRESSED DURING: 4 anthesis F mature embryo stage petal differentiation and expansion stage E expanded cotyledon stage; BEST Arabidopsis thaliana protein match is: unknown protein (TAIR:AT3G62730.1); Has 169 Blast hits to 169 prote…
contig18360	14.0793	21.3707	32.1403	12.0057	UP	AT1G62020.1	Coatomer alpha subunit
contig28223	9.94047	14.9526	22.6902	5.16619	UP
contig46818	11.4958	9.44262	26.2333	7.62515	UP	AT2G15220.1	Plant basic secretory protein (BSP) family protein
contig18671	12.7021	7.08038	28.9582	9.64923	UP	AT3G14610.1	cytochrome P450 family 72 subfamily A polypeptide 7
contig15219	7.92819	10.3812	18.0592	5.71556	UP	AT5G40010.1	AAA-ATPase 1
contig335	24.1789	56.0234	55.0579	30.1137	UP	AT1G11260.1	sugar transporter 1
contig62590	7.86516	7.08933	17.9079	3.72381	UP	AT2G01900.1	DNAse I-like superfamily protein
contig42734	14.2418	12.5671	32.3993	23.6077	UP	AT5G15630.1	COBRA-like extracellular glycosyl-phosphatidyl inositol-anchored protein family
contig3272	43.914	60.5796	99.89	35.427	UP	AT1G17290.1	alanine aminotransferas
contig19859	11.222	17.7376	25.5168	20.7489	UP
contig14822	12.7816	7.52037	29.0471	14.9221	UP	AT4G32940.1	gamma vacuolar processing enzyme
contig8569	25.9935	36.9082	59.072	18.9086	UP	AT5G42740.1	Sugar isomerase (SIS) family protein
contig40817	10.0363	13.0355	22.8047	8.57751	UP	AT2G35680.1	Phosphotyrosine protein phosphatases superfamily protein
contig29680	11.2818	17.3508	25.628	11.1216	UP	AT5G24710.1	Transducin/WD40 repeat-like superfamily protein
contig3447	7.55989	4.94569	17.1706	2.01488	UP	AT3G12500.1	basic chitinase
contig9680	9.56239	10.5042	21.7134	9.09835	UP	AT2G04350.1	AMP-dependent synthetase and ligase family protein
contig57747	8.42956	9.58493	19.1407	4.3392	UP	AT1G25550.1	myb-like transcription factor family protein
contig22470	26.8177	37.3849	60.8131	27.9997	UP	AT4G32410.1	cellulose synthase 1
contig12667	8.78328	2.77026	19.9164	1.98637	UP	AT4G11650.1	osmotin 34
contig12415	11.127	19.2793	25.2264	8.37838	UP
contig8331	7.43525	8.64759	16.8511	5.94332	UP	AT2G11520.1	calmodulin-binding receptor-like cytoplasmic kinase 3
contig371	158.866	119.624	359.937	293.233	UP
contig72609	17.0059	26.2456	38.4516	22.6839	UP
contig11035	34.9502	71.6644	78.9916	28.6535	UP	AT3G25070.1	RPM1 interacting protein 4
contig5363	12.9145	16.7922	29.1857	16.9632	UP	AT1G74030.1	enolase 1
contig1229	35.2649	34.5448	79.6783	41.0349	UP	AT5G09590.1	mitochondrial HSO70 2
contig24139	37.2279	57.1306	84.0043	30.0897	UP	AT3G28715.1	ATPase V0/A0 complex subunit C/D
contig66426	18.9079	99.8724	42.6224	38.2713	UP	AT5G23370.1	GRAM domain-containing protein / ABA-responsive protein-related
contig22175	17.5512	29.1617	39.5582	15.2806	UP	AT2G30110.1	ubiquitin-activating enzyme 1
contig763	17.1152	29.5917	38.5525	19.2057	UP	AT5G54160.1	O-methyltransferase 1
contig32850	26.786	47.3023	60.3322	22.0061	UP	AT5G05340.1	Peroxidase superfamily protein
contig2450	16.6524	19.2675	37.5042	28.07	UP	AT1G13635.1	DNA glycosylase superfamily protein
contig11269	37.1903	54.2476	83.7389	45.6205	UP	AT5G13110.1	glucose-6-phosphate dehydrogenase 2
contig159999	9.26235	19.2349	20.8537	11.6929	UP	AT1G65680.1	expansin B2
contig47948	7.31723	12.0445	16.4743	5.01011	UP	AT3G03990.1	alpha/beta-Hydrolases superfamily protein
contig688	31.7281	63.4802	71.4336	60.6856	UP	AT3G18000.1	S-adenosyl-L-methionine-dependent methyltransferases superfamily protein
contig5349	41.9044	58.4396	94.3277	54.3309	UP	AT5G56350.1	Pyruvate kinase family protein
contig42575	22.7841	40.3517	51.2279	27.8069	UP
contig47333	8.79708	14.0136	19.777	10.528	UP	AT1G60995.1	FUNCTIONS IN: molecular_function unknown; INVOLVED IN: biological_process unknown; LOCATED IN: cellular_component unknown; EXPRESSED IN: 20 plant structures; EXPRESSED DURING: 10 growth stages; CONTAINS InterPro DOMAIN/s: Membralin (InterPro:IPR019144); Has 172 Blast hits to 170 proteins in 70 species: Archae - 0; Bacteria - 0; Metazoa - 110; Fungi - 0; Plants - 38; Viruses - 0; Other Eukaryotes …
contig12847	31.0414	54.063	69.7544	20.4733	UP	AT3G01910.1	sulfite oxidase
contig4696	10.9377	15.5615	24.57	12.6304	UP	AT1G02270.1	Calcium-binding endonuclease/exonuclease/phosphatase family
contig1249	94.3576	108.903	211.927	117.607	UP	AT1G26560.1	beta glucosidase 40
contig29091	10.5531	19.2387	23.6904	9.7147	UP	AT1G58360.1	amino acid permease 1
contig8822	7.54308	2.28681	16.931	3.70549	UP	AT3G15670.1	Late embryogenesis abundant protein (LEA) family protein
contig38797	26.5011	27.0337	59.478	36.3848	UP	AT5G17420.1	Cellulose synthase family protein
contig3614	15.8402	13.1536	35.5496	16.8681	UP	AT3G17880.1	tetraticopeptide domain-containing thioredoxin
contig19207	19.1545	23.1891	42.9467	14.6236	UP	AT1G20050.1	C-8 7 sterol isomerase
contig5252	7.55914	9.39698	16.944	6.77894	UP	AT1G21630.2	Calcium-binding EF hand family protein
contig61360	6.81333	19.8482	15.2686	5.76215	UP
contig3475	97.3945	122.477	218.238	69.994	UP	AT2G36460.1	Aldolase superfamily protein
contig20812	54.662	59.3239	122.417	63.8815	UP	AT2G45180.1	Bifunctional inhibitor/lipid-transfer protein/seed storage 2S albumin superfamily protein
contig11047	28.7577	39.196	64.4027	31.1703	UP	AT3G13930.1	Dihydrolipoamide acetyltransferase long form protein
contig22963	13.0461	20.8607	29.2074	15.4833	UP	AT1G08630.1	threonine aldolase 1
contig3028	212.148	222.1	474.619	367.532	UP
contig150066	14.3115	32.0014	32.0118	4.70525	UP	AT2G25810.1	tonoplast intrinsic protein 4;1
contig36580	10.6385	16.4536	23.7851	6.23706	UP
contig38987	34.1427	50.8111	76.2672	32.4957	UP	AT2G30490.1	cinnamate-4-hydroxylase
contig11046	10.3221	14.6929	23.0486	9.89796	UP	AT3G13930.1	Dihydrolipoamide acetyltransferase long form protein
contig17979	14.6426	23.4545	32.671	11.0089	UP
contig35352	10.8166	13.525	24.1268	6.56882	UP	AT5G23450.3	long-chain base (LCB) kinase 1
contig150492	10.632	16.611	23.7105	9.02116	UP
contig81852	18.4223	27.6717	41.0701	13.6359	UP	AT1G68090.1	annexin 5
contig6614	19.1553	24.9981	42.6885	17.5433	UP	AT2G01190.1	Octicosapeptide/Phox/Bem1p family protein
contig14157	10.0896	27.5977	22.4846	11.5138	UP	AT1G05260.1	Peroxidase superfamily protein
contig24620	22.9658	27.5161	51.1457	24.7411	UP	AT3G11130.1	Clathrin heavy chain
contig2461	117.372	191.983	261.302	101.079	UP	AT2G05710.1	aconitase 3
contig1211	454.957	534.904	1012.85	319.671	UP	AT3G04120.1	glyceraldehyde-3-phosphate dehydrogenase C subunit 1
contig8073	13.3513	19.1237	29.6494	7.62957	UP	AT5G24530.1	2-oxoglutarate (2OG) and Fe(II)-dependent oxygenase superfamily protein
contig6261	7.93606	7.79229	17.6162	61.9413	UP
contig25651	41.0982	52.8629	91.2212	44.806	UP	AT3G17860.1	jasmonate-zim-domain protein 3
contig465	11.1487	11.8372	24.7242	5.17196	UP	AT3G14690.1	cytochrome P450 family 72 subfamily A polypeptide 15
contig40597	51.5137	66.1623	114.204	79.1735	UP
contig51425	11.4255	12.3527	25.3294	13.0202	UP
contig30328	13.7973	21.2328	30.5667	9.13129	UP	AT1G26830.1	cullin 3
contig15116	11.5478	21.1694	25.561	7.81595	UP	AT2G24360.1	Protein kinase superfamily protein
contig20521	21.782	30.2817	48.2081	20.8039	UP	AT1G55530.1	RING/U-box superfamily protein
contig22334	79.1562	107.106	175.17	70.0625	UP	AT1G09430.1	ATP-citrate lyase A-3
contig15990	8.38476	12.0785	18.5372	6.5773	UP
contig55466	15.8587	16.0463	35.0488	20.0842	UP	AT5G34930.1	arogenate dehydrogenase
contig5829	15.5331	22.0181	34.3138	14.0774	UP	AT5G05140.1	Transcription elongation factor (TFIIS) family protein
contig21525	9.18631	12.0183	20.2893	11.0019	UP	AT2G34680.1	Outer arm dynein light chain 1 protein
contig58405	15.1655	19.8469	33.4501	16.0995	UP	AT3G06130.1	Heavy metal transport/detoxification superfamily protein
contig40591	8.81382	12.2498	19.4364	7.48497	UP	AT1G29900.1	carbamoyl phosphate synthetase B
contig16862	10.5432	10.7701	23.2447	9.34242	UP	AT1G49340.2	Phosphatidylinositol 3- and 4-kinase family protein
contig1076	36.9345	53.6807	81.389	33.5199	UP	AT3G52990.1	Pyruvate kinase family protein
contig9129	43.286	65.2303	95.3467	50.334	UP	AT5G56350.1	Pyruvate kinase family protein
contig12095	57.9706	83.7481	127.689	49.7094	UP	AT4G35160.1	O-methyltransferase family protein
contig64638	27.9229	39.4209	61.4768	18.2934	UP
contig5938	10.6053	10.5486	23.3486	4.76972	UP	AT5G58380.1	SOS3-interacting protein 1
contig206	7.22756	12.3362	15.9119	5.12156	UP	AT5G17260.1	NAC domain containing protein 86
contig68115	316.539	1111.24	696.863	254.01	UP
contig20754	13.6335	24.7355	29.9552	8.47664	UP
contig15202	56.8576	119.912	124.917	46.2231	UP	AT4G05050.1	ubiquitin 11
contig15205	17.1984	18.0053	37.7835	15.4014	UP	AT1G72360.2	Integrase-type DNA-binding superfamily protein
contig12839	7.69696	1.94841	16.9092	1.98123	UP	AT3G04720.1	pathogenesis-related 4
contig46141	28.0869	42.1692	61.6631	23.8317	UP	AT3G28715.1	ATPase V0/A0 complex subunit C/D
contig22754	12.8806	14.6826	28.2778	9.77817	UP
contig32274	13.2074	18.6684	28.9942	11.7976	UP	AT5G22300.1	nitrilase 4
contig11706	20.8709	26.3839	45.8093	16.1369	UP	AT5G05440.1	Polyketide cyclase/dehydrase and lipid transport superfamily protein
contig16383	11.9447	16.0075	26.2057	8.85195	UP	AT1G62020.1	Coatomer alpha subunit
contig358	10.5477	18.1968	23.1276	11.3777	UP	AT3G44280.1	unknown protein; FUNCTIONS IN: molecular_function unknown; INVOLVED IN: biological_process unknown; LOCATED IN: endomembrane system; EXPRESSED IN: 24 plant structures; EXPRESSED DURING: 15 growth stages; BEST Arabidopsis thaliana protein match is: unknown protein (TAIR:AT5G22280.1); Has 82 Blast hits to 82 proteins in 13 species: Archae - 0; Bacteria - 0; Metazoa - 0; Fungi - 0; Plants - 82; Viru…
contig704	197.463	315.166	432.912	174.503	UP	AT5G03340.1	ATPase AAA-type CDC48 protein
contig50295	8.86369	12.7057	19.4274	7.7153	UP	AT5G01830.1	ARM repeat superfamily protein
contig1053	18.4926	12.0383	40.5145	6.00026	UP	AT4G25790.1	CAP (Cysteine-rich secretory proteins Antigen 5 and Pathogenesis-related 1 protein) superfamily protein
contig11408	9.1588	17.9193	20.063	11.532	UP	AT5G07990.1	Cytochrome P450 superfamily protein
contig58552	8.31829	14.5858	18.2155	8.2162	UP	AT5G40470.1	RNI-like superfamily protein
contig42712	26.1039	16.7435	57.1551	38.992	UP
contig25982	18.9211	8.2907	41.3805	18.0094	UP	AT1G12240.1	Glycosyl hydrolases family 32 protein
contig4967	38.3719	58.8845	83.9136	53.0542	UP
contig62794	7.80241	4.45281	17.0557	2.10421	UP
contig16950	7.81515	9.95291	17.0768	6.9574	UP	AT5G11970.1	Protein of unknown function (DUF3511)
contig3636	20.9052	37.7486	45.6764	17.1135	UP	AT1G58030.1	cationic amino acid transporter 2
contig54843	13.7952	19.2065	30.1401	10.179	UP
contig65111	8.45475	10.4954	18.4668	16.0054	UP	AT5G60020.1	laccase 17
contig165953	12.2104	13.7588	26.6678	10.7555	UP
contig22176	7.03624	10.0696	15.3575	6.38316	UP	AT2G30110.1	ubiquitin-activating enzyme 1
contig15999	73.6328	92.0156	160.634	60.5079	UP	AT2G32730.1	26S proteasome regulatory complex non-ATPase subcomplex Rpn2/Psmd1 subunit
contig32002	7.81113	10.7614	17.0355	8.90101	UP	AT1G12040.1	leucine-rich repeat/extensin 1
contig16363	9.56509	13.9966	20.856	8.82421	UP	AT5G19780.1	tubulin alpha-5
contig40745	41.739	60.1004	90.9966	31.0891	UP	AT5G50200.3	nitrate transmembrane transporters
contig8180	8.00441	11.3644	17.4462	8.48844	UP	AT5G58300.1	Leucine-rich repeat protein kinase family protein
contig22106	8.31723	13.3002	18.1233	6.84212	UP	AT1G67310.1	Calmodulin-binding transcription activator protein with CG-1 and Ankyrin domains
contig16375	8.09887	13.4802	17.6321	5.91325	UP	AT3G43600.1	aldehyde oxidase 2
contig3270	18.2427	23.1452	39.7027	18.404	UP	AT1G20270.1	2-oxoglutarate (2OG) and Fe(II)-dependent oxygenase superfamily protein
contig8323	12.1619	13.2351	26.4642	8.42158	UP	AT3G23550.1	MATE efflux family protein
contig12837	18.4416	24.291	40.123	19.1434	UP	AT3G13050.1	Major facilitator superfamily protein
contig27910	32.0005	47.4483	69.6119	33.7535	UP	AT4G17170.1	RAB GTPase homolog B1C
contig67014	17.2309	22.9454	37.4799	14.2058	UP	AT4G31490.1	Coatomer beta subunit
contig42380	7.74757	16.3129	16.8506	5.15479	UP	AT4G39090.1	Papain family cysteine protease
contig26081	8.55283	26.9474	18.6006	6.04345	UP	AT2G24100.1	unknown protein; BEST Arabidopsis thaliana protein match is: unknown protein (TAIR:AT4G30780.1); Has 101 Blast hits to 101 proteins in 16 species: Archae - 0; Bacteria - 0; Metazoa - 0; Fungi - 0; Plants - 95; Viruses - 0; Other Eukaryotes - 6 (source: NCBI BLink).
contig8181	166.194	215.657	361.307	166.558	UP	AT4G32410.1	cellulose synthase 1
contig4530	34.9015	50.8069	75.8746	34.6845	UP	AT5G36880.2	acetyl-CoA synthetase
contig24274	9.96938	18.2559	21.671	7.6753	UP	AT4G37640.1	calcium ATPase 2
contig4144	9.10315	21.8512	19.7744	8.51753	UP	AT1G21240.1	wall associated kinase 3
contig1558	34.6034	95.6927	75.1617	24.5469	UP
contig1230	33.1783	29.6501	72.0564	38.7863	UP	AT5G09590.1	mitochondrial HSO70 2
contig12571	18.3078	11.2305	39.7463	37.1635	UP	AT5G64170.2	dentin sialophosphoprotein-related
contig38502	11.131	17.3527	24.1474	10.2555	UP	AT3G24550.1	proline extensin-like receptor kinase 1
contig11853	9.79463	4.59286	21.246	5.82011	UP	AT3G14630.1	cytochrome P450 family 72 subfamily A polypeptide 9
contig142179	10.0823	13.5188	21.8695	11.7826	UP
contig6653	12.8442	17.7196	27.8502	13.9507	UP	AT2G01600.1	ENTH/ANTH/VHS superfamily protein
contig9011	18.8881	27.0166	40.9248	10.3616	UP	AT3G14640.1	cytochrome P450 family 72 subfamily A polypeptide 10
contig50	12.8443	7.71884	27.8296	7.86098	UP	AT3G04940.1	cysteine synthase D1
contig48649	9.4721	10.2194	20.5187	7.893	UP
contig21535	8.65496	1.5415	18.7473	10.4654	UP	AT5G66040.1	sulfurtransferase protein 16
contig14133	25.8302	31.466	55.931	26.3516	UP	AT3G11130.1	Clathrin heavy chain
contig46748	14.1827	26.1894	30.688	11.1056	UP	AT5G61500.1	autophagy 3 (APG3)
contig4788	38.1816	29.0227	82.5962	32.3492	UP	AT1G71695.1	Peroxidase superfamily protein
contig869	24.2624	12.64	52.402	17.1784	UP	AT5G64700.1	nodulin MtN21 /EamA-like transporter family protein
contig16807	7.693	9.80785	16.6141	8.04654	UP	AT4G23200.1	cysteine-rich RLK (RECEPTOR-like protein kinase) 12
contig20410	12.5751	31.058	27.1485	13.548	UP	AT5G01520.1	RING/U-box superfamily protein
contig22872	12.1775	22.6188	26.2731	16.604	UP	AT4G37180.2	Homeodomain-like superfamily protein
contig1034	56.5119	56.6148	121.861	57.6703	UP	AT2G04350.1	AMP-dependent synthetase and ligase family protein
contig23146	18.7419	19.1913	40.4145	24.0473	UP	AT3G62760.1	Glutathione S-transferase family protein
contig24652	18.7711	27.057	40.4418	19.8707	UP	AT2G03500.1	Homeodomain-like superfamily protein
contig3399	23.7918	40.0482	51.25	14.6459	UP	AT1G21270.1	wall-associated kinase 2
contig3328	39.5744	65.9609	85.1843	25.7145	UP	AT2G17200.1	ubiquitin family protein
contig3455	32.9464	27.0068	70.8462	16.5704	UP	AT5G51890.1	Peroxidase superfamily protein
contig10196	14.2764	20.8894	30.6869	10.7224	UP	AT1G15130.1	Endosomal targeting BRO1-like domain-containing protein
contig5769	8.40747	5.64987	18.0669	3.51398	UP	AT1G21890.1	nodulin MtN21 /EamA-like transporter family protein
contig50126	8.53745	5.45469	18.3446	8.62998	UP
contig8179	7.26161	8.87443	15.6025	7.24764	UP	AT5G58300.1	Leucine-rich repeat protein kinase family protein
contig1634	7.15222	11.153	15.3624	10.1998	UP	AT5G23810.1	amino acid permease 7
contig6416	8.70942	12.6176	18.7026	7.88767	UP	AT4G12070.1	unknown protein; INVOLVED IN: biological_process unknown; LOCATED IN: plasma membrane; EXPRESSED IN: 22 plant structures; EXPRESSED DURING: 13 growth stages; Has 30201 Blast hits to 17322 proteins in 780 species: Archae - 12; Bacteria - 1396; Metazoa - 17338; Fungi - 3422; Plants - 5037; Viruses - 0; Other Eukaryotes - 2996 (source: NCBI BLink).
contig2227	44.1469	73.0289	94.7646	35.9882	UP	AT5G24090.1	chitinase A
contig44835	8.57283	13.0076	18.401	8.98114	UP	AT1G59870.1	ABC-2 and Plant PDR ABC-type transporter family protein
contig48762	7.14499	8.88757	15.3357	5.62517	UP	AT1G53570.1	mitogen-activated protein kinase kinase kinase 3
contig4703	8.5978	9.88182	18.4457	9.64708	UP	AT5G39785.2	Protein of unknown function (DUF1666)
contig2261	23.9166	16.2919	51.3103	8.99086	UP	AT4G25790.1	CAP (Cysteine-rich secretory proteins Antigen 5 and Pathogenesis-related 1 protein) superfamily protein
contig22860	32.2058	42.5355	69.0919	28.2774	UP	AT4G32410.1	cellulose synthase 1
contig69127	8.46601	10.6304	18.1486	11.4279	UP	AT4G01070.1	UDP-Glycosyltransferase superfamily protein
contig24749	9.73878	12.835	20.8681	8.80697	UP	AT1G80070.1	Pre-mRNA-processing-splicing factor
contig59624	10.6682	14.8889	22.8541	4.72844	UP	AT1G77330.1	2-oxoglutarate (2OG) and Fe(II)-dependent oxygenase superfamily protein
contig23606	14.4626	43.3114	30.9664	11.508	UP	AT2G37040.1	PHE ammonia lyase 1
contig5195	10.4989	15.9049	22.4791	7.14494	UP	AT1G13900.1	Purple acid phosphatases superfamily protein
contig31511	22.1608	40.2073	47.4449	12.4436	UP	AT2G38940.1	phosphate transporter 1;4
contig43084	7.80745	6.86323	16.7137	11.7542	UP	AT4G31120.1	SHK1 binding protein 1
contig38088	26.7426	44.8878	57.2378	16.3721	UP	AT1G68300.1	Adenine nucleotide alpha hydrolases-like superfamily protein
contig18940	12.483	26.293	26.7176	13.4496	UP	AT1G24440.1	RING/U-box superfamily protein
contig61693	12.2213	11.485	26.1502	24.745	UP	AT4G36220.1	ferulic acid 5-hydroxylase 1
contig14252	63.0362	93.7719	134.841	75.633	UP	AT3G61430.1	plasma membrane intrinsic protein 1A
contig17563	8.79297	11.9238	18.8081	8.52876	UP	AT4G11610.1	C2 calcium/lipid-binding plant phosphoribosyltransferase family protein
contig35809	10.4057	11.3156	22.2458	10.5164	UP	AT5G20280.1	sucrose phosphate synthase 1F
contig5050	11.3225	14.613	24.199	11.7209	UP	AT5G39785.2	Protein of unknown function (DUF1666)
contig8127	7.16511	13.0709	15.3075	8.03026	UP	AT3G21710.2	unknown protein; Has 35333 Blast hits to 34131 proteins in 2444 species: Archae - 798; Bacteria - 22429; Metazoa - 974; Fungi - 991; Plants - 531; Viruses - 0; Other Eukaryotes - 9610 (source: NCBI BLink).
contig35173	9.0797	11.6194	19.3922	8.22361	UP	AT2G38410.1	ENTH/VHS/GAT family protein
contig3701	8.13655	11.8239	17.3706	4.9009	UP	AT1G26830.1	cullin 3
contig32810	59.5308	90.5703	127.069	55.2074	UP	AT2G27510.1	ferredoxin 3
contig7186	9.04894	13.2025	19.2864	11.6701	UP	AT5G62580.1	ARM repeat superfamily protein
contig63323	18.6313	9.95408	39.6933	19.4062	UP
contig25858	7.87869	11.0498	16.7823	7.74607	UP	AT1G01490.1	Heavy metal transport/detoxification superfamily protein
contig20721	9.8705	14.6036	21.0242	9.26094	UP	AT1G20960.1	U5 small nuclear ribonucleoprotein helicase putative
contig42336	26.0272	60.7957	55.3969	25.1219	UP	AT1G56145.2	Leucine-rich repeat transmembrane protein kinase
contig2817	7.94911	12.8016	16.9123	7.93884	UP
contig58842	24.9106	20.5001	52.9841	33.4765	UP
contig16102	8.89331	15.4165	18.8962	7.41896	UP	AT5G45110.1	NPR1-like protein 3
contig77673	14.3686	9.81231	30.5251	8.14142	UP	AT3G53990.1	Adenine nucleotide alpha hydrolases-like superfamily protein
contig31781	8.60363	3.06906	18.2746	9.2037	UP
contig12986	9.65399	12.8665	20.4968	8.91728	UP	AT1G07380.1	Neutral/alkaline non-lysosomal ceramidase
contig5427	9.05441	12.138	19.203	7.5457	UP	AT1G63770.5	Peptidase M1 family protein
contig32750	10.1463	23.1608	21.5148	7.45894	UP	AT1G76350.1	Plant regulator RWP-RK family protein
contig39251	8.8361	18.6682	18.7331	7.31216	UP
contig3477	35.4304	50.4596	75.1145	29.2546	UP	AT5G06460.1	ubiquitin activating enzyme 2
contig19693	11.7936	75.4493	25.0025	36.3718	UP	AT1G80360.1	Pyridoxal phosphate (PLP)-dependent transferases superfamily protein
contig29090	16.0986	37.1128	34.117	14.0483	UP	AT2G42600.2	phosphoenolpyruvate carboxylase 2
contig42711	227.931	822.909	482.933	217.462	UP	AT1G64160.1	Disease resistance-responsive (dirigent-like protein) family protein
contig48749	8.29666	12.6313	17.5763	6.30235	UP	AT5G11970.1	Protein of unknown function (DUF3511)
contig66060	12.1986	18.4177	25.823	5.12336	UP	AT1G77330.1	2-oxoglutarate (2OG) and Fe(II)-dependent oxygenase superfamily protein
contig7003	11.7517	15.263	24.8748	7.49786	UP	AT3G14690.1	cytochrome P450 family 72 subfamily A polypeptide 15
contig12863	7.79958	8.81056	16.5053	6.65458	UP	AT5G27920.1	F-box family protein
contig1958	73.0659	128.49	154.613	48.078	UP	AT1G79230.1	mercaptopyruvate sulfurtransferase 1
contig15438	96.6492	159.384	204.477	60.054	UP	AT2G02990.1	ribonuclease 1
contig25487	20.0274	52.7403	42.3422	45.0827	UP	AT2G45180.1	Bifunctional inhibitor/lipid-transfer protein/seed storage 2S albumin superfamily protein
contig3545	13.4438	18.5466	28.4196	11.1803	UP	AT5G48020.1	2-oxoglutarate (2OG) and Fe(II)-dependent oxygenase superfamily protein
contig3327	40.4762	62.238	85.5533	30.8115	UP	AT2G17200.1	ubiquitin family protein
contig2812	13.7439	20.7734	29.0294	10.4486	UP	AT1G49050.1	Eukaryotic aspartyl protease family protein
contig63743	9.72269	13.0007	20.5329	6.49356	UP
contig8351	72.7153	102.001	153.197	73.6416	UP	AT2G44160.1	methylenetetrahydrofolate reductase 2
contig58139	13.0756	13.0739	27.5414	11.3393	UP	AT5G11110.1	sucrose phosphate synthase 2F
contig70882	21.8243	33.1687	45.9462	15.6817	UP
contig20167	8.20074	10.9468	17.2582	7.96368	UP	AT2G01600.1	ENTH/ANTH/VHS superfamily protein
contig8849	15.695	29.9658	33.008	13.822	UP	AT2G25490.1	EIN3-binding F box protein 1
contig12295	12.4137	20.218	26.0855	8.87875	UP	AT5G24260.1	prolyl oligopeptidase family protein
contig46241	22.3971	27.1132	47.0595	18.382	UP	AT5G05440.1	Polyketide cyclase/dehydrase and lipid transport superfamily protein
contig1027	63.8745	93.0691	134.113	80.4845	UP	AT2G31390.1	pfkB-like carbohydrate kinase family protein
contig8521	15.961	23.7784	33.5083	14.5722	UP	AT3G01780.1	ARM repeat superfamily protein
contig3942	10.1619	12.8027	21.3313	13.3106	UP	AT5G52430.1	hydroxyproline-rich glycoprotein family protein
contig3380	82.7462	117.009	173.628	72.5453	UP	AT2G44350.2	Citrate synthase family protein
contig37529	45.0785	48.3888	94.5887	42.9619	UP	AT2G32730.1	26S proteasome regulatory complex non-ATPase subcomplex Rpn2/Psmd1 subunit
contig30245	8.61299	10.9309	18.0696	6.31022	UP	AT1G08680.4	ARF GAP-like zinc finger-containing protein ZIGA4
contig39682	16.3567	26.4053	34.2685	12.2815	UP	AT5G49810.1	methionine S-methyltransferase
contig18629	10.3439	9.9553	21.6621	4.14866	UP	AT5G43580.1	Serine protease inhibitor potato inhibitor I-type family protein
contig22919	34.6425	82.8602	72.5	21.4445	UP	AT2G14610.1	pathogenesis-related gene 1
contig4316	39.1474	44.6652	81.9048	25.1672	UP	AT3G48300.1	cytochrome P450 family 71 subfamily A polypeptide 23
contig148703	7.76232	15.1165	16.237	10.0332	UP
contig26901	46.9691	25.2288	98.2159	63.1625	UP	AT1G62660.1	Glycosyl hydrolases family 32 protein
contig3524	37.3646	76.6595	78.1244	32.3702	UP	AT2G39940.1	RNI-like superfamily protein
contig34144	9.07552	6.31196	18.9742	7.90727	UP
contig16626	8.63169	8.2766	18.0444	4.7849	UP
contig32782	13.6675	20.393	28.5668	5.76411	UP	AT4G30170.1	Peroxidase family protein
contig20270	14.3159	23.6407	29.9088	14.183	UP	AT1G06410.1	trehalose-phosphatase/synthase 7
contig1830	34.6263	46.3749	72.2854	30.1513	UP	AT3G57260.1	beta-1 3-glucanase 2
contig168501	8.05991	12.4576	16.8229	11.538	UP	AT2G45110.1	expansin B4
contig30444	13.5081	13.6973	28.1901	19.1226	UP	AT5G16930.1	AAA-type ATPase family protein
contig38363	20.6126	18.1352	43.0018	46.394	UP	AT4G36220.1	ferulic acid 5-hydroxylase 1
contig19925	8.67393	9.74704	18.0936	8.35332	UP	AT4G16144.1	associated molecule with the SH3 domain of STAM 3
contig30127	32.0318	46.2844	66.8162	43.9831	UP	AT2G30490.1	cinnamate-4-hydroxylase
contig40483	24.3946	219.081	50.8691	82.0652	UP	AT3G07720.1	Galactose oxidase/kelch repeat superfamily protein
contig44558	27.2868	35.7429	56.8834	31.4878	UP	AT4G26300.1	Arginyl-tRNA synthetase class Ic
contig50749	20.8911	35.4462	43.5399	26.2759	UP	AT2G06025.1	Acyl-CoA N-acyltransferases (NAT) superfamily protein
contig19667	50.4134	78.7927	105.018	54.1284	UP	AT5G35630.1	glutamine synthetase 2
contig12747	92.2498	110.294	192.149	99.4714	UP	AT4G05390.1	root FNR 1
contig4804	9.96169	11.8833	20.7428	12.2435	UP	AT2G40950.1	Basic-leucine zipper (bZIP) transcription factor family protein
contig2649	31.1554	44.3437	64.8524	26.7222	UP	AT5G06460.1	ubiquitin activating enzyme 2
contig17136	12.963	21.5413	26.9652	13.6147	UP	AT5G39590.1	TLD-domain containing nucleolar protein
contig22430	19.4341	17.1472	40.4108	47.66	UP	AT5G53460.1	NADH-dependent glutamate synthase 1
contig11619	26.3992	29.3391	54.8896	21.5615	UP	AT2G42880.1	MAP kinase 20
contig1181	92.736	137.213	192.814	74.7633	UP	AT1G56070.1	Ribosomal protein S5/Elongation factor G/III/V family protein
contig20824	18.9413	13.8421	39.3667	4.2966	UP
contig13830	95.5238	182.442	198.526	120.893	UP
contig20784	9.47526	16.2176	19.6789	10.3281	UP	AT2G45570.1	cytochrome P450 family 76 subfamily C polypeptide 2
contig5253	9.16232	10.3457	19.0088	7.83171	UP	AT1G21630.2	Calcium-binding EF hand family protein
contig44231	60.5554	57.771	125.617	32.6294	UP
contig2813	123.324	179.1	255.62	72.653	UP	AT1G49050.1	Eukaryotic aspartyl protease family protein
contig9782	14.2103	22.391	29.4543	11.321	UP	AT4G33300.1	ADR1-like 1
contig17114	10.7047	8.6734	22.1875	18.3427	UP	AT5G15630.1	COBRA-like extracellular glycosyl-phosphatidyl inositol-anchored protein family
contig40316	10.7449	20.3193	22.2706	8.83659	UP
contig11845	20.6891	73.48	42.8745	13.4279	UP	AT1G68020.2	UDP-Glycosyltransferase / trehalose-phosphatase family protein
contig8763	11.7396	21.473	24.3069	12.1468	UP	AT3G01860.1	unknown protein; FUNCTIONS IN: molecular_function unknown; INVOLVED IN: response to cadmium ion; LOCATED IN: chloroplast; EXPRESSED IN: 24 plant structures; EXPRESSED DURING: 13 growth stages; BEST Arabidopsis thaliana protein match is: unknown protein (TAIR:AT3G27210.1); Has 66 Blast hits to 66 proteins in 13 species: Archae - 0; Bacteria - 0; Metazoa - 5; Fungi - 0; Plants - 61; Viruses - 0; Ot…
contig31027	18.0581	41.9083	37.3868	16.9466	UP	AT5G05340.1	Peroxidase superfamily protein
contig6812	11.9287	23.4231	24.6963	9.8486	UP	AT3G45640.1	mitogen-activated protein kinase 3
contig20219	13.4889	10.1889	27.9233	8.95618	UP	AT5G47060.1	Protein of unknown function (DUF581)
contig60559	8.2387	24.7611	17.0506	16.3511	UP	AT5G63160.1	BTB and TAZ domain protein 1
contig31516	13.9759	24.3151	28.924	16.5418	UP	AT4G38620.1	myb domain protein 4
contig9106	10.4903	14.2765	21.7014	10.1059	UP	AT5G39180.1	RmlC-like cupins superfamily protein
contig10229	12.3579	17.6914	25.5615	12.8058	UP	AT2G21510.1	DNAJ heat shock N-terminal domain-containing protein
contig11887	13.0608	14.8335	27.0122	15.7916	UP	AT2G39130.1	Transmembrane amino acid transporter family protein
contig24032	18.7561	33.4707	38.7803	14.9564	UP	AT4G13010.1	Oxidoreductase zinc-binding dehydrogenase family protein
contig21992	10.7628	13.2259	22.248	6.97157	UP	AT1G03250.2	unknown protein; FUNCTIONS IN: molecular_function unknown; INVOLVED IN: biological_process unknown; LOCATED IN: cellular_component unknown; EXPRESSED IN: 24 plant structures; EXPRESSED DURING: 15 growth stages.
contig62301	9.79856	11.2172	20.2527	5.72127	UP	AT3G63530.1	RING/U-box superfamily protein
contig30772	7.73111	12.6451	15.9794	7.79726	UP	AT1G61820.1	beta glucosidase 46
contig38090	11.5628	15.2531	23.8946	19.9936	UP
contig20148	7.80673	19.3441	16.127	11.3523	UP	AT3G48360.1	BTB and TAZ domain protein 2
contig42783	9.09318	8.68466	18.7722	11.1264	UP	AT1G04190.1	Tetratricopeptide repeat (TPR)-like superfamily protein
contig33088	19.5469	9.61415	40.3166	12.7928	UP	AT3G09390.1	metallothionein 2A
contig49677	8.37171	15.3957	17.2609	8.60643	UP	AT2G16120.1	polyol/monosaccharide transporter 1
contig22335	82.8877	104.528	170.847	72.0396	UP	AT1G09430.1	ATP-citrate lyase A-3
contig68750	28.495	92.3225	58.7074	78.7849	UP
contig22499	97.0271	227.707	199.881	175.47	UP
contig16194	33.9969	49.8576	70.032	27.2332	UP	AT5G55850.2	RPM1-interacting protein 4 (RIN4) family protein
contig5310	16.8431	27.2804	34.6949	9.72015	UP	AT2G16050.1	Cysteine/Histidine-rich C1 domain family protein
contig40487	9.34707	14.895	19.2526	22.0634	UP
contig39323	7.70464	14.5904	15.854	10.3519	UP	AT1G75220.1	Major facilitator superfamily protein
contig45643	8.6139	11.0799	17.7172	20.5726	UP	AT5G45910.1	GDSL-like Lipase/Acylhydrolase superfamily protein
contig7453	12.0691	12.3417	24.817	23.4396	UP
contig11955	62.7476	77.2507	128.951	61.1121	UP	AT4G37930.1	serine transhydroxymethyltransferase 1
contig2370	17.6904	21.5904	36.3204	14.6126	UP	AT2G17200.1	ubiquitin family protein
contig28724	28.8967	39.6076	59.3148	23.8967	UP	AT1G15130.1	Endosomal targeting BRO1-like domain-containing protein
contig36488	15.4717	32.901	31.7521	20.287	UP	AT4G12730.1	FASCICLIN-like arabinogalactan 2
contig8678	29.2802	30.3246	60.0618	38.935	UP	AT5G17770.1	NADH:cytochrome B5 reductase 1
contig1353	17.7152	31.8374	36.336	17.0293	UP	AT3G14830.1	unknown protein; BEST Arabidopsis thaliana protein match is: unknown protein (TAIR:AT1G53450.2); Has 73 Blast hits to 73 proteins in 12 species: Archae - 0; Bacteria - 0; Metazoa - 0; Fungi - 0; Plants - 73; Viruses - 0; Other Eukaryotes - 0 (source: NCBI BLink).
contig15504	68.7549	117.235	140.986	92.7988	UP	AT5G59970.1	Histone superfamily protein
contig16205	7.54154	24.3834	15.463	7.32491	UP	AT1G43670.1	Inositol monophosphatase family protein
contig20442	13.0584	29.5647	26.7668	14.6446	UP
contig40565	15.6123	23.4908	31.9857	14.4957	UP	AT3G16760.1	Tetratricopeptide repeat (TPR)-like superfamily protein
contig2846	11.0631	16.0607	22.6649	9.79934	UP	AT3G08947.1	ARM repeat superfamily protein
contig62270	17.1733	29.6831	35.1766	17.3366	UP	AT1G64190.1	6-phosphogluconate dehydrogenase family protein
contig35187	13.1051	18.0787	26.8324	13.6423	UP	AT1G49340.2	Phosphatidylinositol 3- and 4-kinase family protein
contig71325	11.1964	12.8132	22.9242	26.793	UP	AT5G60020.1	laccase 17
contig3501	7.4294	8.40149	15.2063	9.92639	UP	AT4G30080.1	auxin response factor 16
contig9466	39.5157	59.7823	80.8729	31.3777	UP	AT2G32300.1	uclacyanin 1
contig48761	8.67723	14.869	17.7549	8.3514	UP	AT4G20970.1	basic helix-loop-helix (bHLH) DNA-binding superfamily protein
contig41586	15.6024	26.0526	31.923	17.277	UP	AT1G08630.1	threonine aldolase 1
contig19468	9.98269	5.55529	20.4206	1.0124	UP	AT4G35160.1	O-methyltransferase family protein
contig25596	7.73732	10.9337	15.827	4.97824	UP	AT3G14790.1	rhamnose biosynthesis 3
contig13934	14.393	22.7513	29.4147	11.6647	UP	AT3G48530.1	SNF1-related protein kinase regulatory subunit gamma 1
contig49475	15.1159	27.2719	30.8749	12.2217	UP
contig47061	7.55394	6.42475	15.3963	11.5082	UP	AT1G44800.1	nodulin MtN21 /EamA-like transporter family protein
contig249	23.4586	27.8336	47.7958	8.46902	UP	AT1G71830.1	somatic embryogenesis receptor-like kinase 1
contig16088	7.47262	7.38238	15.2174	11.9007	UP	AT4G25720.1	glutaminyl cyclase
contig13800	12.118	40.7245	24.6681	5.03468	UP	AT5G57540.1	xyloglucan endotransglucosylase/hydrolase 13
contig42786	13.3283	16.2	27.1294	9.87431	UP	AT4G17500.1	ethylene responsive element binding factor 1
contig6729	18.3432	25.1238	37.3365	17.2744	UP	AT1G21410.1	F-box/RNI-like superfamily protein
contig23822	17.5414	24.2596	35.6812	19.2358	UP	AT5G50200.3	nitrate transmembrane transporters
contig10752	74.1516	92.2929	150.785	59.0002	UP	AT5G65750.1	2-oxoglutarate dehydrogenase E1 component
contig25347	10.42	17.8887	21.1873	7.38141	UP	AT4G34100.1	RING/U-box superfamily protein
contig12846	44.2238	73.5985	89.9147	34.4597	UP	AT3G01910.1	sulfite oxidase
contig1916	14.2205	20.213	28.9042	15.0278	UP	AT3G52140.4	tetratricopeptide repeat (TPR)-containing protein
contig1077	23.8147	32.9415	48.3631	29.6903	UP	AT1G01490.1	Heavy metal transport/detoxification superfamily protein
contig13787	94.6813	122.526	192.279	92.1553	UP	AT2G31390.1	pfkB-like carbohydrate kinase family protein
contig45856	19.1735	31.3443	38.9339	26.4059	UP
contig20809	8.37168	19.8919	16.9922	9.1894	UP	AT1G74790.1	catalytics
contig5583	87.8182	47.2749	178.18	131.051	UP	AT1G73040.1	Mannose-binding lectin superfamily protein
contig5964	8.50409	11.9159	17.2468	9.91867	UP	AT5G45290.2	RING/U-box superfamily protein
contig25413	35.0007	44.4104	70.9656	38.9664	UP	AT2G40890.1	cytochrome P450 family 98 subfamily A polypeptide 3
contig28035	23.024	33.949	46.6684	16.7588	UP
contig12811	11.431	18.821	23.1636	8.87685	UP	AT2G26170.1	cytochrome P450 family 711 subfamily A polypeptide 1
contig53724	12.7397	15.255	25.8139	9.63871	UP	AT4G30080.1	auxin response factor 16
contig2860	109.121	157.394	220.983	103.146	UP	AT1G20260.1	ATPase V1 complex subunit B protein
contig42440	26.5899	15.3756	53.8328	29.4678	UP	AT1G69120.1	K-box region and MADS-box transcription factor family protein
contig26979	11.6932	18.5123	23.6735	15.5386	UP	AT1G58440.1	FAD/NAD(P)-binding oxidoreductase family protein
contig3721	9.88807	13.3275	20.0188	8.83382	UP	AT1G32100.1	pinoresinol reductase 1
contig6074	54.1437	50.6517	109.525	29.2239	UP	AT5G06720.1	peroxidase 2
contig23335	84.4669	184.958	170.813	24.9442	UP	AT3G19690.1	CAP (Cysteine-rich secretory proteins Antigen 5 and Pathogenesis-related 1 protein) superfamily protein
contig9969	12.1881	27.9335	24.6437	8.99483	UP	AT3G14770.1	Nodulin MtN3 family protein
contig52093	14.3817	15.8212	29.071	12.3502	UP	AT4G34450.1	coatomer gamma-2 subunit putative / gamma-2 coat protein putative / gamma-2 COP putative
contig2242	8.62239	11.452	17.4285	7.11676	UP	AT4G16760.1	acyl-CoA oxidase 1
contig12939	12.5654	16.1182	25.3814	9.3789	UP	AT3G13050.1	Major facilitator superfamily protein
contig12680	17.6958	23.436	35.7362	15.3655	UP	AT1G05805.1	basic helix-loop-helix (bHLH) DNA-binding superfamily protein
contig4190	18.0561	19.4311	36.4423	19.0416	UP	AT4G31990.3	aspartate aminotransferase 5
contig16845	92.8089	136.245	187.235	76.2028	UP	AT5G54500.2	flavodoxin-like quinone reductase 1
contig8072	100.386	191.266	202.508	88.1766	UP	AT3G02520.1	general regulatory factor 7
contig1598	9.52265	17.3372	19.1983	6.37874	UP	AT3G14590.2	Calcium-dependent lipid-binding (CaLB domain) family protein
contig7030	7.74436	6.0438	15.6046	11.6724	UP	AT3G21380.1	Mannose-binding lectin superfamily protein
contig4502	7.67438	11.2745	15.4634	5.73887	UP	AT5G13140.1	Pollen Ole e 1 allergen and extensin family protein
contig19321	7.47518	17.5976	15.0617	7.51167	UP	AT2G36910.1	ATP binding cassette subfamily B1
contig19377	113.009	160.829	227.696	117.185	UP	AT3G59970.3	methylenetetrahydrofolate reductase 1
contig22300	55.6508	158.6	112.051	28.2416	UP	AT4G16260.1	Glycosyl hydrolase superfamily protein
contig2035	85.7418	118.723	172.595	79.6261	UP	AT4G37930.1	serine transhydroxymethyltransferase 1
contig19259	9.32724	12.0566	18.7618	8.18508	UP
contig10233	11.3894	253.785	22.9087	139.854	UP	AT1G59960.1	NAD(P)-linked oxidoreductase superfamily protein
contig162	428.694	622.828	861.955	411.346	UP	AT5G43330.1	Lactate/malate dehydrogenase family protein
contig8141	10.0913	10.2291	20.2856	6.66787	UP
contig20572	12.7924	25.3998	25.709	8.59319	UP	AT2G27050.1	ETHYLENE-INSENSITIVE3-like 1
contig938	18.6282	33.1895	37.428	27.6253	UP	AT1G75220.1	Major facilitator superfamily protein
contig121961	32.7452	54.3719	65.7748	5.4603	UP	AT1G73010.1	phosphate starvation-induced gene 2
contig11590	10.885	14.471	21.8538	9.42525	UP	AT5G44790.1	copper-exporting ATPase / responsive-to-antagonist 1 / copper-transporting ATPase (RAN1)
contig2556	35.9389	84.0557	72.1167	31.8391	UP	AT4G37900.1	Protein of unknown function (duplicated DUF1399)
contig28732	14.9661	21.1543	30.0316	11.4074	UP	AT2G03800.1	D-aminoacyl-tRNA deacylases
contig919	498.142	900.858	998.677	252.059	UP	AT3G43190.1	sucrose synthase 4
contig5950	9.62085	13.8596	19.2874	6.77759	UP	AT1G54710.1	homolog of yeast autophagy 18 (ATG18) H
contig25735	12.2483	16.1581	24.5491	17.0513	UP	AT1G21920.1	Histone H3 K4-specific methyltransferase SET7/9 family protein
contig22067	9.60093	12.8109	19.2409	9.72878	UP	AT3G43300.1	HOPM interactor 7
contig22991	64.6138	83.8305	129.465	44.7668	UP	AT1G53500.1	NAD-dependent epimerase/dehydratase family protein
contig21563	11.4803	16.0784	22.9883	8.30877	UP	AT1G59750.1	auxin response factor 1
contig4464	36.5337	41.8722	73.1518	38.7967	UP	AT5G05170.1	Cellulose synthase family protein
contig37694	19.4014	26.0101	38.8427	18.0334	UP	AT4G21810.1	DERLIN-2.1
contig633	407.802	543.272	816.369	385.094	UP	AT2G36460.1	Aldolase superfamily protein
contig56713	9.06051	9.36564	18.1283	17.0048	UP	AT5G16750.1	Transducin family protein / WD-40 repeat family protein
contig8693	8.62138	10.1384	17.244	11.4316	UP	AT5G04140.2	glutamate synthase 1

## Sheet: Foglio2
blastx_hit_def
AT1G01490			blastx_hit_def
AT1G01490			AT1G01490
AT1G01490			AT1G01720
AT1G01720			AT1G01830
AT1G01720			AT1G02260
AT1G01830			AT1G02270
AT1G02260			AT1G03230
AT1G02270			AT1G03250
AT1G03230			AT1G03475
AT1G03250			AT1G03610
AT1G03475			AT1G04190
AT1G03475			AT1G04280
AT1G03610			AT1G05260
AT1G04190			AT1G05805
AT1G04280			AT1G06260
AT1G05260			AT1G06410
AT1G05260			AT1G07380
AT1G05260			AT1G07510
AT1G05805			AT1G08090
AT1G06260			AT1G08630
AT1G06410			AT1G08680
AT1G06410			AT1G09090
AT1G07380			AT1G09240
AT1G07510			AT1G09430
AT1G07510			AT1G10360
AT1G08090			AT1G10390
AT1G08090			AT1G10970
AT1G08090			AT1G11260
AT1G08090			AT1G11330
AT1G08630			AT1G11340
AT1G08630			AT1G11530
AT1G08680			AT1G11680
AT1G09090			AT1G12040
AT1G09240			AT1G12110
AT1G09240			AT1G12240
AT1G09240			AT1G13440
AT1G09430			AT1G13635
AT1G09430			AT1G13640
AT1G10360			AT1G13700
AT1G10390			AT1G13900
AT1G10970			AT1G14870
AT1G11260			AT1G15130
AT1G11260			AT1G15520
AT1G11330			AT1G15710
AT1G11340			AT1G15740
AT1G11530			AT1G15960
AT1G11530			AT1G17290
AT1G11680			AT1G18980
AT1G11680			AT1G19180
AT1G12040			AT1G19530
AT1G12110			AT1G19740
AT1G12110			AT1G20050
AT1G12110			AT1G20160
AT1G12240			AT1G20260
AT1G13440			AT1G20270
AT1G13440			AT1G20850
AT1G13440			AT1G20960
AT1G13635			AT1G21200
AT1G13640			AT1G21210
AT1G13700			AT1G21240
AT1G13900			AT1G21270
AT1G14870			AT1G21380
AT1G15130			AT1G21410
AT1G15130			AT1G21450
AT1G15520			AT1G21460
AT1G15710			AT1G21630
AT1G15740			AT1G21680
AT1G15740			AT1G21890
AT1G15960			AT1G21920
AT1G17290			AT1G22170
AT1G17290			AT1G22540
AT1G18980			AT1G24440
AT1G19180			AT1G24625
AT1G19530			AT1G25280
AT1G19740			AT1G25550
AT1G19740			AT1G26560
AT1G20050			AT1G26830
AT1G20160			AT1G28600
AT1G20260			AT1G29900
AT1G20270			AT1G30040
AT1G20850			AT1G30360
AT1G20960			AT1G30440
AT1G21200			AT1G32100
AT1G21210			AT1G32130
AT1G21240			AT1G32210
AT1G21270			AT1G32230
AT1G21270			AT1G32950
AT1G21380			AT1G33055
AT1G21410			AT1G33140
AT1G21410			AT1G35910
AT1G21450			AT1G43160
AT1G21450			AT1G43670
AT1G21460			AT1G43890
AT1G21630			AT1G44170
AT1G21630			AT1G44800
AT1G21680			AT1G47980
AT1G21890			AT1G48600
AT1G21920			AT1G49050
AT1G21920			AT1G49340
AT1G22170			AT1G49850
AT1G22540			AT1G51760
AT1G24440			AT1G51800
AT1G24625			AT1G51890
AT1G25280			AT1G53500
AT1G25280			AT1G53570
AT1G25550			AT1G53910
AT1G26560			AT1G54710
AT1G26830			AT1G55020
AT1G26830			AT1G55530
AT1G26830			AT1G55910
AT1G28600			AT1G56070
AT1G29900			AT1G56130
AT1G30040			AT1G56145
AT1G30040			AT1G56430
AT1G30360			AT1G56700
AT1G30440			AT1G58030
AT1G32100			AT1G58170
AT1G32100			AT1G58360
AT1G32130			AT1G58440
AT1G32210			AT1G59750
AT1G32230			AT1G59870
AT1G32950			AT1G59960
AT1G33055			AT1G60995
AT1G33055			AT1G61800
AT1G33140			AT1G61820
AT1G35910			AT1G62020
AT1G43160			AT1G62660
AT1G43670			AT1G63440
AT1G43890			AT1G63770
AT1G44170			AT1G63940
AT1G44800			AT1G64160
AT1G44800			AT1G64190
AT1G44800			AT1G64530
AT1G47980			AT1G65680
AT1G48600			AT1G66950
AT1G49050			AT1G67310
AT1G49050			AT1G68020
AT1G49340			AT1G68090
AT1G49340			AT1G68300
AT1G49850			AT1G68510
AT1G51760			AT1G68840
AT1G51800			AT1G69120
AT1G51890			AT1G69800
AT1G53500			AT1G70410
AT1G53570			AT1G70940
AT1G53910			AT1G71360
AT1G53910			AT1G71695
AT1G54710			AT1G71830
AT1G55020			AT1G71900
AT1G55530			AT1G72210
AT1G55910			AT1G72280
AT1G56070			AT1G72330
AT1G56070			AT1G72360
AT1G56070			AT1G72720
AT1G56070			AT1G72820
AT1G56130			AT1G73010
AT1G56130			AT1G73040
AT1G56145			AT1G74030
AT1G56430			AT1G74310
AT1G56430			AT1G74790
AT1G56430			AT1G75220
AT1G56430			AT1G76140
AT1G56430			AT1G76350
AT1G56430			AT1G76490
AT1G56430			AT1G76550
AT1G56700			AT1G77120
AT1G56700			AT1G77330
AT1G58030			AT1G77760
AT1G58170			AT1G78050
AT1G58360			AT1G78290
AT1G58440			AT1G78440
AT1G58440			AT1G78900
AT1G59750			AT1G79230
AT1G59870			AT1G79620
AT1G59960			AT1G80070
AT1G60995			AT1G80160
AT1G61800			AT1G80360
AT1G61800			AT1G80530
AT1G61820			AT2G01190
AT1G62020			AT2G01420
AT1G62020			AT2G01600
AT1G62660			AT2G01900
AT1G62660			AT2G02040
AT1G63440			AT2G02160
AT1G63440			AT2G02220
AT1G63440			AT2G02250
AT1G63770			AT2G02320
AT1G63940			AT2G02790
AT1G64160			AT2G02990
AT1G64190			AT2G03500
AT1G64530			AT2G03800
AT1G64530			AT2G03890
AT1G64530			AT2G04350
AT1G65680			AT2G05710
AT1G65680			AT2G05790
AT1G65680			AT2G06025
AT1G65680			AT2G11520
AT1G66950			AT2G14610
AT1G66950			AT2G15220
AT1G67310			AT2G15620
AT1G68020			AT2G15890
AT1G68020			AT2G16050
AT1G68090			AT2G16060
AT1G68300			AT2G16120
AT1G68510			AT2G16400
AT1G68840			AT2G16720
AT1G68840			AT2G17200
AT1G68840			AT2G17290
AT1G68840			AT2G17850
AT1G69120			AT2G18700
AT1G69800			AT2G18960
AT1G70410			AT2G19590
AT1G70940			AT2G19810
AT1G71360			AT2G19860
AT1G71695			AT2G20610
AT1G71695			AT2G20670
AT1G71830			AT2G20830
AT1G71900			AT2G21320
AT1G72210			AT2G21390
AT1G72210			AT2G21510
AT1G72280			AT2G21520
AT1G72280			AT2G21940
AT1G72330			AT2G22125
AT1G72360			AT2G22190
AT1G72360			AT2G23140
AT1G72360			AT2G23570
AT1G72360			AT2G23780
AT1G72720			AT2G24100
AT1G72820			AT2G24360
AT1G72820			AT2G24550
AT1G72820			AT2G25280
AT1G72820			AT2G25490
AT1G73010			AT2G25810
AT1G73040			AT2G25940
AT1G74030			AT2G26170
AT1G74310			AT2G26230
AT1G74790			AT2G26660
AT1G74790			AT2G26670
AT1G75220			AT2G27050
AT1G75220			AT2G27510
AT1G76140			AT2G28710
AT1G76350			AT2G30110
AT1G76490			AT2G30490
AT1G76550			AT2G31390
AT1G76550			AT2G32300
AT1G77120			AT2G32730
AT1G77120			AT2G32830
AT1G77120			AT2G33150
AT1G77120			AT2G34680
AT1G77120			AT2G35040
AT1G77120			AT2G35060
AT1G77330			AT2G35510
AT1G77330			AT2G35680
AT1G77330			AT2G35930
AT1G77330			AT2G36460
AT1G77330			AT2G36570
AT1G77760			AT2G36770
AT1G77760			AT2G36910
AT1G77760			AT2G37040
AT1G78050			AT2G37460
AT1G78290			AT2G37710
AT1G78440			AT2G38410
AT1G78900			AT2G38905
AT1G79230			AT2G38940
AT1G79620			AT2G39130
AT1G79620			AT2G39940
AT1G80070			AT2G40890
AT1G80160			AT2G40940
AT1G80360			AT2G40950
AT1G80530			AT2G41250
AT1G80530			AT2G41430
AT1G80530			AT2G42280
AT2G01190			AT2G42600
AT2G01420			AT2G42880
AT2G01600			AT2G43710
AT2G01600			AT2G44160
AT2G01900			AT2G44310
AT2G01900			AT2G44350
AT2G02040			AT2G45110
AT2G02040			AT2G45180
AT2G02160			AT2G45570
AT2G02220			AT2G46550
AT2G02250			AT2G47000
AT2G02320			AT2G47520
AT2G02790			AT2G47710
AT2G02990			AT3G01190
AT2G03500			AT3G01420
AT2G03500			AT3G01470
AT2G03500			AT3G01780
AT2G03800			AT3G01860
AT2G03890			AT3G01910
AT2G04350			AT3G02050
AT2G04350			AT3G02520
AT2G04350			AT3G02550
AT2G05710			AT3G02630
AT2G05710			AT3G03990
AT2G05790			AT3G04120
AT2G06025			AT3G04610
AT2G06025			AT3G04720
AT2G11520			AT3G04940
AT2G14610			AT3G05500
AT2G15220			AT3G05640
AT2G15220			AT3G06130
AT2G15620			AT3G06483
AT2G15890			AT3G07720
AT2G15890			AT3G08947
AT2G16050			AT3G09220
AT2G16050			AT3G09270
AT2G16060			AT3G09390
AT2G16060			AT3G09840
AT2G16120			AT3G10040
AT2G16120			AT3G10340
AT2G16400			AT3G11130
AT2G16720			AT3G12500
AT2G17200			AT3G12630
AT2G17200			AT3G13050
AT2G17200			AT3G13340
AT2G17290			AT3G13930
AT2G17850			AT3G14230
AT2G17850			AT3G14590
AT2G17850			AT3G14610
AT2G18700			AT3G14630
AT2G18700			AT3G14640
AT2G18960			AT3G14660
AT2G19590			AT3G14690
AT2G19590			AT3G14770
AT2G19590			AT3G14790
AT2G19810			AT3G14830
AT2G19810			AT3G14940
AT2G19860			AT3G15450
AT2G20610			AT3G15630
AT2G20670			AT3G15670
AT2G20670			AT3G16560
AT2G20830			AT3G16760
AT2G20830			AT3G16770
AT2G21320			AT3G17860
AT2G21390			AT3G17880
AT2G21510			AT3G18000
AT2G21520			AT3G19420
AT2G21940			AT3G19690
AT2G21940			AT3G21380
AT2G22125			AT3G21420
AT2G22125			AT3G21710
AT2G22190			AT3G23280
AT2G22190			AT3G23430
AT2G23140			AT3G23550
AT2G23570			AT3G23640
AT2G23780			AT3G24290
AT2G24100			AT3G24503
AT2G24100			AT3G24550
AT2G24360			AT3G25070
AT2G24550			AT3G25270
AT2G24550			AT3G25690
AT2G25280			AT3G25730
AT2G25490			AT3G26300
AT2G25810			AT3G28490
AT2G25940			AT3G28715
AT2G25940			AT3G29970
AT2G26170			AT3G30390
AT2G26230			AT3G42050
AT2G26230			AT3G43190
AT2G26660			AT3G43300
AT2G26670			AT3G43600
AT2G27050			AT3G44280
AT2G27510			AT3G45640
AT2G28710			AT3G47160
AT2G30110			AT3G47340
AT2G30110			AT3G47420
AT2G30490			AT3G47640
AT2G30490			AT3G47730
AT2G30490			AT3G47790
AT2G30490			AT3G48050
AT2G30490			AT3G48140
AT2G30490			AT3G48300
AT2G31390			AT3G48350
AT2G31390			AT3G48360
AT2G32300			AT3G48530
AT2G32730			AT3G49340
AT2G32730			AT3G51630
AT2G32830			AT3G52140
AT2G32830			AT3G52450
AT2G32830			AT3G52590
AT2G33150			AT3G52990
AT2G34680			AT3G53260
AT2G35040			AT3G53420
AT2G35060			AT3G53620
AT2G35510			AT3G53990
AT2G35680			AT3G54420
AT2G35680			AT3G54700
AT2G35680			AT3G55410
AT2G35930			AT3G55440
AT2G36460			AT3G55840
AT2G36460			AT3G55990
AT2G36460			AT3G57062
AT2G36570			AT3G57260
AT2G36770			AT3G58760
AT2G36910			AT3G59340
AT2G37040			AT3G59690
AT2G37040			AT3G59910
AT2G37040			AT3G59970
AT2G37040			AT3G61430
AT2G37460			AT3G62020
AT2G37460			AT3G62550
AT2G37710			AT3G62760
AT2G38410			AT3G63530
AT2G38410			AT4G00430
AT2G38905			AT4G01070
AT2G38940			AT4G01630
AT2G38940			AT4G02600
AT2G39130			AT4G04570
AT2G39940			AT4G04920
AT2G40890			AT4G05050
AT2G40890			AT4G05200
AT2G40890			AT4G05390
AT2G40940			AT4G07960
AT2G40950			AT4G10265
AT2G41250			AT4G10270
AT2G41250			AT4G10510
AT2G41430			AT4G10520
AT2G42280			AT4G10530
AT2G42280			AT4G10540
AT2G42600			AT4G11610
AT2G42600			AT4G11650
AT2G42600			AT4G12070
AT2G42880			AT4G12080
AT2G42880			AT4G12470
AT2G43710			AT4G12510
AT2G44160			AT4G12730
AT2G44310			AT4G13010
AT2G44350			AT4G13420
AT2G45110			AT4G13510
AT2G45180			AT4G14580
AT2G45180			AT4G16144
AT2G45180			AT4G16260
AT2G45570			AT4G16760
AT2G45570			AT4G17170
AT2G46550			AT4G17260
AT2G47000			AT4G17500
AT2G47520			AT4G17670
AT2G47520			AT4G17770
AT2G47710			AT4G17940
AT2G47710			AT4G18780
AT2G47710			AT4G18930
AT2G47710			AT4G20970
AT2G47710			AT4G21100
AT2G47710			AT4G21390
AT3G01190			AT4G21810
AT3G01190			AT4G22590
AT3G01420			AT4G23180
AT3G01470			AT4G23200
AT3G01780			AT4G23270
AT3G01780			AT4G23760
AT3G01860			AT4G23850
AT3G01910			AT4G24730
AT3G01910			AT4G25720
AT3G02050			AT4G25790
AT3G02050			AT4G26270
AT3G02520			AT4G26300
AT3G02550			AT4G27270
AT3G02550			AT4G27450
AT3G02550			AT4G27470
AT3G02630			AT4G28700
AT3G03990			AT4G29990
AT3G04120			AT4G30080
AT3G04610			AT4G30170
AT3G04720			AT4G30190
AT3G04940			AT4G31120
AT3G05500			AT4G31490
AT3G05500			AT4G31860
AT3G05640			AT4G31990
AT3G05640			AT4G32060
AT3G06130			AT4G32410
AT3G06483			AT4G32690
AT3G06483			AT4G32940
AT3G07720			AT4G33010
AT3G08947			AT4G33070
AT3G09220			AT4G33300
AT3G09220			AT4G33420
AT3G09270			AT4G33950
AT3G09390			AT4G34100
AT3G09840			AT4G34260
AT3G09840			AT4G34450
AT3G10040			AT4G34610
AT3G10040			AT4G34840
AT3G10340			AT4G34970
AT3G10340			AT4G35090
AT3G10340			AT4G35160
AT3G11130			AT4G35470
AT3G11130			AT4G35840
AT3G12500			AT4G36220
AT3G12500			AT4G37180
AT3G12630			AT4G37520
AT3G12630			AT4G37530
AT3G13050			AT4G37640
AT3G13050			AT4G37900
AT3G13340			AT4G37930
AT3G13340			AT4G38260
AT3G13930			AT4G38620
AT3G13930			AT4G39090
AT3G14230			AT5G01520
AT3G14590			AT5G01650
AT3G14610			AT5G01830
AT3G14630			AT5G03230
AT3G14640			AT5G03340
AT3G14660			AT5G03380
AT3G14690			AT5G04140
AT3G14690			AT5G04380
AT3G14690			AT5G05140
AT3G14690			AT5G05170
AT3G14690			AT5G05340
AT3G14690			AT5G05440
AT3G14770			AT5G06460
AT3G14790			AT5G06720
AT3G14830			AT5G06740
AT3G14940			AT5G07010
AT3G14940			AT5G07070
AT3G15450			AT5G07390
AT3G15630			AT5G07475
AT3G15630			AT5G07990
AT3G15670			AT5G08100
AT3G16560			AT5G08570
AT3G16560			AT5G08790
AT3G16760			AT5G09590
AT3G16770			AT5G09810
AT3G16770			AT5G10100
AT3G17860			AT5G10530
AT3G17880			AT5G10770
AT3G18000			AT5G10930
AT3G19420			AT5G11110
AT3G19690			AT5G11940
AT3G21380			AT5G11970
AT3G21420			AT5G13030
AT3G21710			AT5G13110
AT3G23280			AT5G13140
AT3G23430			AT5G14700
AT3G23550			AT5G14780
AT3G23640			AT5G15100
AT3G24290			AT5G15120
AT3G24503			AT5G15140
AT3G24503			AT5G15180
AT3G24503			AT5G15630
AT3G24550			AT5G16570
AT3G25070			AT5G16750
AT3G25270			AT5G16930
AT3G25690			AT5G17010
AT3G25730			AT5G17060
AT3G26300			AT5G17260
AT3G26300			AT5G17330
AT3G28490			AT5G17420
AT3G28490			AT5G17540
AT3G28715			AT5G17770
AT3G28715			AT5G17820
AT3G29970			AT5G17920
AT3G29970			AT5G18130
AT3G30390			AT5G18790
AT3G42050			AT5G19140
AT3G43190			AT5G19400
AT3G43190			AT5G19780
AT3G43300			AT5G20280
AT3G43600			AT5G20400
AT3G44280			AT5G22300
AT3G45640			AT5G22440
AT3G47160			AT5G22850
AT3G47340			AT5G22920
AT3G47340			AT5G23370
AT3G47420			AT5G23450
AT3G47420			AT5G23810
AT3G47640			AT5G24090
AT3G47730			AT5G24180
AT3G47730			AT5G24260
AT3G47730			AT5G24530
AT3G47790			AT5G24710
AT3G48050			AT5G25280
AT3G48140			AT5G25940
AT3G48300			AT5G26010
AT3G48350			AT5G26120
AT3G48360			AT5G27760
AT3G48530			AT5G27920
AT3G49340			AT5G28770
AT3G49340			AT5G33280
AT3G49340			AT5G34930
AT3G51630			AT5G35630
AT3G52140			AT5G36110
AT3G52450			AT5G36250
AT3G52590			AT5G36880
AT3G52990			AT5G37600
AT3G52990			AT5G38710
AT3G52990			AT5G38820
AT3G53260			AT5G38960
AT3G53260			AT5G39110
AT3G53420			AT5G39120
AT3G53420			AT5G39150
AT3G53620			AT5G39180
AT3G53990			AT5G39590
AT3G53990			AT5G39785
AT3G54420			AT5G39890
AT3G54700			AT5G40010
AT3G54700			AT5G40470
AT3G54700			AT5G40850
AT3G55410			AT5G42050
AT3G55440			AT5G42650
AT3G55440			AT5G42740
AT3G55840			AT5G43330
AT3G55840			AT5G43350
AT3G55990			AT5G43580
AT3G57062			AT5G44030
AT3G57260			AT5G44730
AT3G58760			AT5G44790
AT3G59340			AT5G45110
AT3G59340			AT5G45275
AT3G59690			AT5G45290
AT3G59910			AT5G45540
AT3G59970			AT5G45890
AT3G61430			AT5G45900
AT3G62020			AT5G45910
AT3G62550			AT5G46330
AT3G62760			AT5G47040
AT3G63530			AT5G47060
AT4G00430			AT5G47390
AT4G00430			AT5G47560
AT4G01070			AT5G47910
AT4G01630			AT5G48020
AT4G02600			AT5G48485
AT4G02600			AT5G48930
AT4G02600			AT5G49760
AT4G02600			AT5G49810
AT4G02600			AT5G49890
AT4G02600			AT5G50000
AT4G04570			AT5G50200
AT4G04920			AT5G50380
AT4G05050			AT5G50760
AT4G05200			AT5G51060
AT4G05390			AT5G51440
AT4G05390			AT5G51890
AT4G07960			AT5G52430
AT4G07960			AT5G53460
AT4G10265			AT5G53550
AT4G10265			AT5G53560
AT4G10270			AT5G53970
AT4G10270			AT5G54160
AT4G10270			AT5G54500
AT4G10270			AT5G54770
AT4G10270			AT5G54800
AT4G10270			AT5G55850
AT4G10270			AT5G56080
AT4G10270			AT5G56350
AT4G10270			AT5G56760
AT4G10270			AT5G57540
AT4G10270			AT5G58300
AT4G10270			AT5G58380
AT4G10510			AT5G58390
AT4G10520			AT5G58787
AT4G10530			AT5G59520
AT4G10530			AT5G59670
AT4G10540			AT5G59720
AT4G10540			AT5G59970
AT4G10540			AT5G60020
AT4G11610			AT5G60600
AT4G11650			AT5G60780
AT4G11650			AT5G61500
AT4G12070			AT5G62580
AT4G12080			AT5G62700
AT4G12470			AT5G62740
AT4G12510			AT5G63160
AT4G12510			AT5G63500
AT4G12730			AT5G63790
AT4G13010			AT5G64120
AT4G13420			AT5G64170
AT4G13510			AT5G64700
AT4G13510			AT5G65640
AT4G13510			AT5G65750
AT4G14580			AT5G66040
AT4G16144			AT5G66760
AT4G16260
AT4G16260
AT4G16260
AT4G16760
AT4G17170
AT4G17260
AT4G17260
AT4G17260
AT4G17260
AT4G17500
AT4G17500
AT4G17670
AT4G17770
AT4G17940
AT4G17940
AT4G18780
AT4G18780
AT4G18930
AT4G20970
AT4G21100
AT4G21390
AT4G21810
AT4G22590
AT4G23180
AT4G23200
AT4G23270
AT4G23760
AT4G23850
AT4G24730
AT4G25720
AT4G25720
AT4G25790
AT4G25790
AT4G26270
AT4G26270
AT4G26270
AT4G26270
AT4G26300
AT4G27270
AT4G27450
AT4G27450
AT4G27470
AT4G27470
AT4G28700
AT4G29990
AT4G30080
AT4G30080
AT4G30170
AT4G30190
AT4G30190
AT4G31120
AT4G31490
AT4G31860
AT4G31860
AT4G31990
AT4G32060
AT4G32060
AT4G32410
AT4G32410
AT4G32410
AT4G32410
AT4G32690
AT4G32690
AT4G32940
AT4G32940
AT4G33010
AT4G33010
AT4G33010
AT4G33070
AT4G33070
AT4G33300
AT4G33420
AT4G33420
AT4G33420
AT4G33950
AT4G34100
AT4G34260
AT4G34450
AT4G34450
AT4G34610
AT4G34840
AT4G34970
AT4G34970
AT4G35090
AT4G35160
AT4G35160
AT4G35160
AT4G35160
AT4G35160
AT4G35470
AT4G35840
AT4G35840
AT4G36220
AT4G36220
AT4G36220
AT4G36220
AT4G37180
AT4G37180
AT4G37520
AT4G37530
AT4G37640
AT4G37900
AT4G37900
AT4G37930
AT4G37930
AT4G38260
AT4G38620
AT4G39090
AT5G01520
AT5G01520
AT5G01650
AT5G01830
AT5G03230
AT5G03230
AT5G03340
AT5G03340
AT5G03340
AT5G03380
AT5G04140
AT5G04380
AT5G05140
AT5G05170
AT5G05340
AT5G05340
AT5G05340
AT5G05340
AT5G05340
AT5G05340
AT5G05340
AT5G05340
AT5G05340
AT5G05340
AT5G05340
AT5G05440
AT5G05440
AT5G06460
AT5G06460
AT5G06460
AT5G06720
AT5G06720
AT5G06740
AT5G07010
AT5G07070
AT5G07390
AT5G07475
AT5G07990
AT5G07990
AT5G07990
AT5G07990
AT5G07990
AT5G08100
AT5G08570
AT5G08570
AT5G08790
AT5G09590
AT5G09590
AT5G09590
AT5G09810
AT5G10100
AT5G10530
AT5G10770
AT5G10930
AT5G10930
AT5G10930
AT5G11110
AT5G11110
AT5G11940
AT5G11970
AT5G11970
AT5G13030
AT5G13110
AT5G13140
AT5G13140
AT5G14700
AT5G14780
AT5G14780
AT5G15100
AT5G15120
AT5G15140
AT5G15180
AT5G15630
AT5G15630
AT5G16570
AT5G16750
AT5G16930
AT5G17010
AT5G17060
AT5G17260
AT5G17330
AT5G17330
AT5G17330
AT5G17330
AT5G17330
AT5G17330
AT5G17420
AT5G17420
AT5G17420
AT5G17420
AT5G17540
AT5G17770
AT5G17820
AT5G17820
AT5G17920
AT5G18130
AT5G18790
AT5G19140
AT5G19140
AT5G19400
AT5G19780
AT5G20280
AT5G20280
AT5G20400
AT5G22300
AT5G22300
AT5G22440
AT5G22850
AT5G22920
AT5G22920
AT5G23370
AT5G23450
AT5G23810
AT5G24090
AT5G24090
AT5G24180
AT5G24260
AT5G24530
AT5G24710
AT5G25280
AT5G25280
AT5G25940
AT5G25940
AT5G25940
AT5G25940
AT5G25940
AT5G25940
AT5G25940
AT5G25940
AT5G25940
AT5G25940
AT5G25940
AT5G25940
AT5G25940
AT5G25940
AT5G25940
AT5G26010
AT5G26120
AT5G27760
AT5G27760
AT5G27920
AT5G28770
AT5G33280
AT5G34930
AT5G35630
AT5G35630
AT5G36110
AT5G36250
AT5G36250
AT5G36880
AT5G37600
AT5G37600
AT5G38710
AT5G38820
AT5G38960
AT5G38960
AT5G39110
AT5G39110
AT5G39110
AT5G39120
AT5G39150
AT5G39180
AT5G39590
AT5G39785
AT5G39785
AT5G39890
AT5G39890
AT5G39890
AT5G39890
AT5G39890
AT5G39890
AT5G40010
AT5G40470
AT5G40850
AT5G42050
AT5G42650
AT5G42650
AT5G42740
AT5G43330
AT5G43350
AT5G43580
AT5G43580
AT5G44030
AT5G44030
AT5G44730
AT5G44730
AT5G44790
AT5G45110
AT5G45275
AT5G45290
AT5G45540
AT5G45890
AT5G45900
AT5G45910
AT5G45910
AT5G46330
AT5G47040
AT5G47060
AT5G47060
AT5G47060
AT5G47060
AT5G47390
AT5G47560
AT5G47910
AT5G47910
AT5G47910
AT5G48020
AT5G48485
AT5G48485
AT5G48930
AT5G49760
AT5G49760
AT5G49760
AT5G49810
AT5G49890
AT5G50000
AT5G50200
AT5G50200
AT5G50380
AT5G50760
AT5G50760
AT5G51060
AT5G51060
AT5G51440
AT5G51890
AT5G52430
AT5G53460
AT5G53460
AT5G53550
AT5G53550
AT5G53560
AT5G53970
AT5G54160
AT5G54160
AT5G54160
AT5G54160
AT5G54500
AT5G54500
AT5G54770
AT5G54800
AT5G55850
AT5G56080
AT5G56350
AT5G56350
AT5G56760
AT5G57540
AT5G57540
AT5G58300
AT5G58300
AT5G58380
AT5G58380
AT5G58390
AT5G58390
AT5G58787
AT5G59520
AT5G59670
AT5G59720
AT5G59720
AT5G59720
AT5G59970
AT5G60020
AT5G60020
AT5G60600
AT5G60780
AT5G61500
AT5G62580
AT5G62700
AT5G62740
AT5G62740
AT5G62740
AT5G63160
AT5G63160
AT5G63500
AT5G63790
AT5G64120
AT5G64170
AT5G64170
AT5G64700
AT5G64700
AT5G65640
AT5G65750
AT5G65750
AT5G66040
AT5G66760
