# Supplementary material for: Molecular Responses to Cadmium Exposure in Two Contrasting Durum Wheat Genotypes
Source: Int J Mol Sci. 2021 Jul 8;22(14):7343. doi: 10.3390/ijms22147343 (PMC8306872; doi:10.3390/ijms22147343)
Supplement: Supplementary file 1 [file ijms-22-07343-s001.zip › Table S4_ Up-regulated only in L-Cd treated plants.xlsx]

## Sheet: Foglio1
gene_id	L_root_CTRL	L_root_CD	H_root_CTRL	H_root_CD	L Root CTRL Vs CD	blastx_hit_def	annotation
contig10011	11.9888	24.8194	28.45	7.50451	UP	AT2G42600	phosphoenolpyruvate carboxylase 2
contig10118	24.396	42.6612	24.8377	19.3321	UP	AT1G53580	glyoxalase II 3
contig10299	15.2362	31.0057	21.9872	12.4662	UP	AT4G31550	WRKY DNA-binding protein 11
contig10405	16.664	32.5207	9.53515	5.05542	UP	AT5G21170	5'-AMP-activated protein kinase beta-2 subunit protein
contig10688	115.636	203.695	68.1999	76.7573	UP
contig10700	4.65292	20.1413	25.1437	11.539	UP	AT3G55840	Hs1pro-1 protein
contig10732	26.076	59.9863	71.1525	59.4132	UP	AT4G02600	Seven transmembrane MLO family protein
contig10779	22.3184	61.396	38.7337	33.5988	UP	AT3G08650	ZIP metal ion transporter family
contig10789	21.0955	72.7344	30.9168	42.0448	UP	AT2G05830	NagB/RpiA/CoA transferase-like superfamily protein
contig10965	20.31	39.6068	58.7203	14.5005	UP
contig11035	34.9502	71.6644	78.9916	28.6535	UP	AT3G25070	RPM1 interacting protein 4
contig11113	22.5541	44.6313	44.2992	16.4095	UP	AT2G23810	tetraspanin8
contig113097	31.1321	53.5083	36.7115	28.8955	UP	AT1G67090	ribulose bisphosphate carboxylase small chain 1A
contig1132	11.9026	26.3242	13.3535	17.8442	UP	AT3G20870	ZIP metal ion transporter family
contig114425	5.14469	22.4937	13.135	2.08323	UP
contig11453	13.216	24.8843	22.2914	9.66296	UP
contig11463	13.5885	24.7287	10.0421	9.98092	UP
contig11507	240.729	779.192	681.949	282.945	UP	AT1G20850	xylem cysteine peptidase 2
contig115371	10.5823	44.9845	11.1758	8.04152	UP
contig116	15.8335	29.2884	12.9407	17.5506	UP
contig11655	10.3684	23.4956	16.025	10.147	UP	AT5G07100	WRKY DNA-binding protein 26
contig11742	18.5626	47.3822	32.5524	22.1591	UP	AT1G20190	expansin 11
contig11845	20.6891	73.48	42.8745	13.4279	UP	AT1G68020	UDP-Glycosyltransferase / trehalose-phosphatase family protein
contig11876	14.9312	27.1625	25.5133	14.0542	UP	AT3G24503	aldehyde dehydrogenase 2C4
contig12032	11.1554	24.8471	32.3399	10.4801	UP	AT4G33010	glycine decarboxylase P-protein 1
contig1212	67.9415	121.878	64.6469	97.4476	UP	AT1G02335	germin-like protein subfamily 2 member 2 precursor
contig12139	7.40137	53.2973	18.7858	13.0719	UP	AT5G05340	Peroxidase superfamily protein
contig12240	56.5363	198.815	316.67	69.9918	UP	AT5G16570	glutamine synthetase 1;4
contig122857	9.2741	26.5412	163.577	44.8467	UP	AT5G25940	early nodulin-related
contig12316	14.8261	34.8335	38.2946	7.8668	UP	AT2G16050	Cysteine/Histidine-rich C1 domain family protein
contig12320	19.819	34.802	27.9464	14.9094	UP	AT5G07830	glucuronidase 2
contig124033	10.1801	22.2897	14.431	15.0516	UP
contig12449	7.10148	26.2394	27.7422	10.8017	UP	AT1G21460	Nodulin MtN3 family protein
contig12455	22.4695	42.7004	35.4155	25.4767	UP	AT1G05260	Peroxidase superfamily protein
contig12508	19.9489	53.1497	100.976	35.6857	UP	AT2G24550	unknown protein; BEST Arabidopsis thaliana protein match is: unknown protein (TAIR:AT4G31510.1); Has 219 Blast hits to 219 proteins in 33 species: Archae - 0; Bacteria - 0; Metazoa - 16; Fungi - 2; Plants - 184; Viruses - 0; Other Eukaryotes - 17 (source: NCBI BLink).
contig12701	63.8509	112.772	96.9118	29.8117	UP
contig127072	3.13716	21.0376	80.9616	18.181	UP	AT5G25940	early nodulin-related
contig12847	31.0414	54.063	69.7544	20.4733	UP	AT3G01910	sulfite oxidase
contig13075	160.96	419.858	188.892	280.245	UP	AT4G22570	adenine phosphoribosyl transferase 3
contig13139	24.5309	49.8922	64.918	21.8672	UP	AT3G12630	A20/AN1-like zinc finger family protein
contig13158	10.434	22.2308	29.5771	7.6403	UP	AT1G15520	pleiotropic drug resistance 12
contig1326	94.6757	270.026	378.207	90.9846	UP	AT1G77120	alcohol dehydrogenase 1
contig13431	6.28637	22.3383	11.8428	5.33159	UP	AT3G61060	phloem protein 2-A13
contig1353	17.7152	31.8374	36.336	17.0293	UP	AT3G14830	unknown protein; BEST Arabidopsis thaliana protein match is: unknown protein (TAIR:AT1G53450.2); Has 73 Blast hits to 73 proteins in 12 species: Archae - 0; Bacteria - 0; Metazoa - 0; Fungi - 0; Plants - 73; Viruses - 0; Other Eukaryotes - 0 (source: NCBI BLink).
contig13545	14.6696	65.0224	22.3663	35.6806	UP	AT1G63440	heavy metal atpase 5
contig13685	20.8742	36.4438	61.9097	22.5529	UP
contig13702	10.7964	24.437	17.9615	4.26976	UP	AT1G68810	basic helix-loop-helix (bHLH) DNA-binding superfamily protein
contig13800	12.118	40.7245	24.6681	5.03468	UP	AT5G57540	xyloglucan endotransglucosylase/hydrolase 13
contig13830	95.5238	182.442	198.526	120.893	UP
contig13833	13.9777	26.1386	14.1429	3.40963	UP	AT1G10360	glutathione S-transferase TAU 18
contig13839	26.861	49.2152	37.2472	14.7245	UP	AT5G62740	SPFH/Band 7/PHB domain-containing membrane-associated protein family
contig13840	34.3041	84.0135	93.5487	27.5545	UP	AT5G62740	SPFH/Band 7/PHB domain-containing membrane-associated protein family
contig13858	50.5527	100.6	136.676	98.4173	UP
contig13863	16.3738	29.319	9.89336	6.13973	UP	AT1G47840	hexokinase 3
contig138679	14.7705	83.8367	201.623	32.2673	UP	AT5G39890	Protein of unknown function (DUF1637)
contig13890	13.6047	25.5067	16.7158	12.386	UP	AT1G05260	Peroxidase superfamily protein
contig1393	22.5486	43.9283	45.0579	23.7015	UP	AT3G22400	PLAT/LH2 domain-containing lipoxygenase family protein
contig13971	306.714	546.272	713.534	291.036	UP	AT1G56070	Ribosomal protein S5/Elongation factor G/III/V family protein
contig14107	32.5614	137.922	132.305	45.0206	UP	AT3G15450	Aluminium induced protein with YGL and LRDR motifs
contig14157	10.0896	27.5977	22.4846	11.5138	UP	AT1G05260	Peroxidase superfamily protein
contig14163	36.2828	140.267	226.775	58.2311	UP	AT5G37600	glutamine synthase clone R1
contig141977	7.3726	22.6534	98.1115	28.1811	UP	AT3G02630	Plant stearoyl-acyl-carrier-protein desaturase family protein
contig14209	11.8221	22.5412	19.298	8.25896	UP	AT3G51550	Malectin/receptor-like protein kinase family protein
contig143856	2.72574	29.9098	10.7864	15.3029	UP	AT4G24120	YELLOW STRIPE like 1
contig14402	7.23366	31.6359	24.932	7.37471	UP	AT2G05790	O-Glycosyl hydrolases family 17 protein
contig145565	11.0149	51.5816	305.258	79.6334	UP	AT5G25940	early nodulin-related
contig1460	13.8237	25.6098	24.1733	15.5299	UP	AT5G42650	allene oxide synthase
contig14602	73.8347	211.991	259.511	148.213	UP
contig146024	22.3322	37.8127	29.7939	22.3183	UP
contig14740	15.7049	26.8956	47.5864	8.77889	UP	AT4G37520	Peroxidase superfamily protein
contig14834	14.4176	26.1737	34.2507	11.786	UP	AT4G33010	glycine decarboxylase P-protein 1
contig14886	19.0043	32.888	22.8792	28.8787	UP	AT3G13790	Glycosyl hydrolases family 32 protein
contig14894	29.1042	71.1433	99.6565	28.064	UP	AT5G54160	O-methyltransferase 1
contig14907	12.5415	21.3902	30.71	8.55319	UP	AT5G11940	Subtilase family protein
contig14958	10.8138	20.6511	17.8977	10.1734	UP	AT3G55470	Calcium-dependent lipid-binding (CaLB domain) family protein
contig150066	14.3115	32.0014	32.0118	4.70525	UP	AT2G25810	tonoplast intrinsic protein 4;1
contig150191	23.0644	41.3584	27.0615	22.2714	UP	AT5G38410	Ribulose bisphosphate carboxylase (small chain) family protein
contig150520	11.9671	21.077	23.7124	9.81715	UP	AT1G77330	2-oxoglutarate (2OG) and Fe(II)-dependent oxygenase superfamily protein
contig15116	11.5478	21.1694	25.561	7.81595	UP	AT2G24360	Protein kinase superfamily protein
contig1513	150.693	277.534	280.988	83.461	UP	AT1G10370	Glutathione S-transferase family protein
contig15156	9.20793	37.271	18.2577	18.2805	UP	AT5G53850	haloacid dehalogenase-like hydrolase family protein
contig15202	56.8576	119.912	124.917	46.2231	UP	AT4G05050	ubiquitin 11
contig15345	19.0399	33.3409	29.3429	12.279	UP	AT2G23810	tetraspanin8
contig154079	15.0683	32.0756	25.7881	5.46851	UP	AT3G16240	delta tonoplast integral protein
contig15476	27.3345	46.7486	38.0968	25.9177	UP	AT1G76900	tubby like protein 1
contig155750	11.036	58.0096	125.577	20.8618	UP	AT5G15120	Protein of unknown function (DUF1637)
contig1558	34.6034	95.6927	75.1617	24.5469	UP
contig155804	12.9157	33.1861	42.3572	14.8147	UP	AT5G26010	Protein phosphatase 2C family protein
contig15598	20.2921	42.7924	53.2472	20.5701	UP	AT3G12630	A20/AN1-like zinc finger family protein
contig156672	11.9804	32.1193	50.1616	15.3325	UP	AT2G47710	Adenine nucleotide alpha hydrolases-like superfamily protein
contig156711	39.8925	114.747	46.4163	64.7794	UP
contig157960	14.9326	34.2925	20.2256	14.8363	UP	AT1G06330	Heavy metal transport/detoxification superfamily protein
contig158666	12.8432	23.8098	11.7311	10.5645	UP	AT5G67620	unknown protein; FUNCTIONS IN: molecular_function unknown; INVOLVED IN: N-terminal protein myristoylation; LOCATED IN: microtubule; BEST Arabidopsis thaliana protein match is: unknown protein (TAIR:AT5G62900.1); Has 1807 Blast hits to 1807 proteins in 277 species: Archae - 0; Bacteria - 0; Metazoa - 736; Fungi - 347; Plants - 385; Viruses - 0; Other Eukaryotes - 339 (source: NCBI BLink).
contig159012	12.1842	30.7181	29.7483	9.58514	UP	AT2G37040	PHE ammonia lyase 1
contig160100	6.47102	21.1864	13.4463	5.38813	UP
contig1613	12.1192	26.7916	32.132	12.1995	UP	AT3G47340	glutamine-dependent asparagine synthase 1
contig161540	11.3344	26.9077	16.8719	10.2823	UP	AT5G67420	LOB domain-containing protein 37
contig16160	15.6295	34.9751	22.159	16.9357	UP	AT2G39640	glycosyl hydrolase family 17 protein
contig16176	32.8853	65.3438	53.1792	31.5879	UP	AT1G47128	Granulin repeat cysteine protease family protein
contig16205	7.54154	24.3834	15.463	7.32491	UP	AT1G43670	Inositol monophosphatase family protein
contig16227	6.61394	31.6083	10.0655	14.3124	UP	AT1G47240	NRAMP metal ion transporter 2
contig163953	33.2625	73.2259	64.9986	45.611	UP
contig164282	55.098	167.141	45.3521	45.9689	UP	AT1G65870	Disease resistance-responsive (dirigent-like protein) family protein
contig16469	21.8308	40.4488	91.4215	29.8536	UP	AT1G03475	Coproporphyrinogen III oxidase
contig164847	22.9698	39.4386	30.1932	32.482	UP
contig16520	13.9472	23.9107	34.1323	14.9756	UP	AT3G24503	aldehyde dehydrogenase 2C4
contig16537	9.73619	25.8121	28.908	8.46432	UP	AT3G02050	K+ uptake transporter 3
contig16579	41.2214	91.1688	117.551	44.1075	UP	AT4G34970	actin depolymerizing factor 9
contig16648	33.9669	74.3973	84.2297	55.9993	UP
contig167163	13.367	55.0791	209.532	5.92651	UP	AT5G43350	phosphate transporter 1;1
contig167423	3.82334	25.9412	10.2135	5.71761	UP	AT3G19690	CAP (Cysteine-rich secretory proteins Antigen 5 and Pathogenesis-related 1 protein) superfamily protein
contig167550	14.8001	57.3511	168.605	6.14406	UP	AT2G32830	phosphate transporter 1;5
contig167857	30.2347	56.1887	41.5154	32.865	UP	AT5G53890	phytosylfokine-alpha receptor 2
contig167875	9.21598	34.0254	21.3673	11.0215	UP	AT2G36570	Leucine-rich repeat protein kinase family protein
contig168029	10.6472	36.5786	6.7887	8.48762	UP
contig168301	49.0696	105.316	192.626	46.307	UP	AT2G32830	phosphate transporter 1;5
contig168479	16.943	30.0278	26.0432	8.72879	UP
contig169100	27.9104	48.7613	53.0202	11.5713	UP
contig169135	78.9816	325.112	104.155	68.8104	UP	AT3G09390	metallothionein 2A
contig169707	12.9764	72.4423	14.4018	19.6831	UP
contig170187	12.6616	50.5035	113.201	10.248	UP	AT1G21680	DPP6 N-terminal domain-like protein
contig170262	6.87112	32.6677	6.7745	2.19635	UP
contig17082	13.256	27.9455	30.5421	15.5988	UP	AT2G03500	Homeodomain-like superfamily protein
contig1711	10.0908	21.577	33.6736	21.5279	UP
contig171247	37.254	62.4668	133.841	88.9329	UP
contig17229	21.1009	41.4676	32.1619	17.9624	UP	AT2G37040	PHE ammonia lyase 1
contig17403	12.5899	24.6189	17.8922	13.6492	UP	AT1G05260	Peroxidase superfamily protein
contig17426	12.6893	21.5503	29.2135	7.25396	UP	AT5G49760	Leucine-rich repeat protein kinase family protein
contig17454	17.802	46.4749	45.0716	11.3782	UP	AT1G62660	Glycosyl hydrolases family 32 protein
contig17633	16.4654	28.538	19.1283	15.2242	UP	AT2G39730	rubisco activase
contig17669	18.0667	42.6049	52.2423	13.5379	UP	AT5G54770	thiazole biosynthetic enzyme chloroplast (ARA6) (THI1) (THI4)
contig17747	34.5304	81.8454	127.182	25.1294	UP
contig17754	27.4191	47.5164	89.7162	19.5583	UP	AT4G35160	O-methyltransferase family protein
contig1778	13.0045	33.1641	37.0487	16.6903	UP	AT4G02600	Seven transmembrane MLO family protein
contig17795	47.6617	110.375	59.666	34.8149	UP	AT5G21170	5'-AMP-activated protein kinase beta-2 subunit protein
contig17811	11.0572	28.4849	44.4215	5.80411	UP
contig17961	17.8438	44.4716	28.2762	17.1607	UP	AT2G24100	unknown protein; BEST Arabidopsis thaliana protein match is: unknown protein (TAIR:AT4G30780.1); Has 101 Blast hits to 101 proteins in 16 species: Archae - 0; Bacteria - 0; Metazoa - 0; Fungi - 0; Plants - 95; Viruses - 0; Other Eukaryotes - 6 (source: NCBI BLink).
contig18237	16.8401	32.4948	59.8604	12.6354	UP	AT5G62740	SPFH/Band 7/PHB domain-containing membrane-associated protein family
contig18278	15.832	27.1367	29.6691	17.1587	UP	AT2G02040	peptide transporter 2
contig18469	10.2259	24.7753	78.1454	18.8406	UP	AT5G44730	Haloacid dehalogenase-like hydrolase (HAD) superfamily protein
contig18488	22.3668	40.729	24.1528	11.2327	UP	AT4G16800	ATP-dependent caseinolytic (Clp) protease/crotonase family protein
contig18569	20.375	34.9273	40.2686	12.3759	UP	AT2G37040	PHE ammonia lyase 1
contig18598	9.22813	26.2682	49.3469	16.3612	UP	AT1G12110	nitrate transporter 1.1
contig18675	37.5755	64.2305	91.7327	34.0121	UP	AT5G06460	ubiquitin activating enzyme 2
contig18774	31.1469	79.7874	92.2979	42.9507	UP	AT5G24180	Lipase class 3-related protein
contig18813	20.2639	36.1512	34.9598	16.5272	UP	AT1G50670	OTU-like cysteine protease family protein
contig18940	12.483	26.293	26.7176	13.4496	UP	AT1G24440	RING/U-box superfamily protein
contig1898	20.415	60.5581	47.597	26.6384	UP	AT4G27270	Quinone reductase family protein
contig19074	20.6725	46.4098	22.4248	21.0186	UP
contig19087	8.44154	27.8202	29.4466	6.61655	UP	AT1G15740	Leucine-rich repeat family protein
contig19197	6.06529	21.2374	18.6671	4.8283	UP	AT1G15960	NRAMP metal ion transporter 6
contig19334	23.8784	85.61	128.709	11.5217	UP	AT3G29970	B12D protein
contig19443	16.7127	32.5372	38.8467	13.3543	UP	AT5G50380	exocyst subunit exo70 family protein F1
contig1956	29.3598	52.2519	40.3285	22.2568	UP	AT1G80460	Actin-like ATPase superfamily protein
contig1958	73.0659	128.49	154.613	48.078	UP	AT1G79230	mercaptopyruvate sulfurtransferase 1
contig19693	11.7936	75.4493	25.0025	36.3718	UP	AT1G80360	Pyridoxal phosphate (PLP)-dependent transferases superfamily protein
contig19757	126.61	322.076	179.128	257.253	UP	AT3G17390	S-adenosylmethionine synthetase family protein
contig19791	13.6658	26.6891	27.1843	12.2302	UP	AT1G01720	NAC (No Apical Meristem) domain transcriptional regulator superfamily protein
contig19887	21.9452	47.0811	22.4513	16.7496	UP	AT4G05030	Copper transport protein family
contig19919	13.591	31.4002	38.3915	12.169	UP	AT2G19860	hexokinase 2
contig19944	27.1414	64.24	77.6373	55.7832	UP	AT1G61800	glucose-6-phosphate/phosphate translocator 2
contig19983	10.5802	24.4235	18.8594	12.5116	UP	AT1G63440	heavy metal atpase 5
contig20183	10.3786	25.9059	16.8972	6.70783	UP	AT3G62760	Glutathione S-transferase family protein
contig20271	14.3839	27.6916	37.3096	13.2238	UP	AT1G06410	trehalose-phosphatase/synthase 7
contig20299	20.3019	43.3644	27.8279	29.71	UP	AT2G05260	alpha/beta-Hydrolases superfamily protein
contig20351	20.236	43.3999	30.6	7.68948	UP	AT4G21585	endonuclease 4
contig2036	60.1301	113.237	200.086	71.2251	UP	AT1G56700	Peptidase C15 pyroglutamyl peptidase I-like
contig20410	12.5751	31.058	27.1485	13.548	UP	AT5G01520	RING/U-box superfamily protein
contig20442	13.0584	29.5647	26.7668	14.6446	UP
contig20495	15.1242	26.0885	23.2881	13.7435	UP	AT5G51970	GroES-like zinc-binding alcohol dehydrogenase family protein
contig20571	34.9039	66.7489	67.0338	23.6186	UP	AT2G27050	ETHYLENE-INSENSITIVE3-like 1
contig20572	12.7924	25.3998	25.709	8.59319	UP	AT2G27050	ETHYLENE-INSENSITIVE3-like 1
contig20675	54.1227	105.628	129.022	44.0544	UP	AT5G17330	glutamate decarboxylase
contig20754	13.6335	24.7355	29.9552	8.47664	UP
contig20813	16.1689	35.593	25.4069	15.4712	UP
contig21113	15.4281	32.6584	29.8594	16.5761	UP	AT3G01500	carbonic anhydrase 1
contig21131	86.1063	203.232	85.7116	38.0643	UP	AT1G02260	Divalent ion symporter
contig21151	15.1407	30.6247	76.722	12.2281	UP	AT3G47730	ATP-binding cassette A2
contig21228	27.2298	46.7356	50.9505	24.8592	UP	AT5G11950	Putative lysine decarboxylase family protein
contig21453	11.1499	22.1383	30.4369	11.3192	UP	AT1G21450	SCARECROW-like 1
contig21541	28.9602	56.7092	49.0031	21.1468	UP	AT2G15220	Plant basic secretory protein (BSP) family protein
contig21948	15.9974	35.1131	21.4724	9.33132	UP	AT1G03230	Eukaryotic aspartyl protease family protein
contig22063	16.0614	28.9368	22.0661	15.7839	UP	AT5G01240	like AUXIN RESISTANT 1
contig22135	25.5363	47.4223	31.3663	25.3138	UP	AT1G05260	Peroxidase superfamily protein
contig22271	9.84605	22.9615	16.0921	18.7902	UP	AT4G34950	Major facilitator superfamily protein
contig2230	214.442	474.082	274.581	382.706	UP	AT3G17390	S-adenosylmethionine synthetase family protein
contig22300	55.6508	158.6	112.051	28.2416	UP	AT4G16260	Glycosyl hydrolase superfamily protein
contig22325	23.251	118.992	28.1785	9.96701	UP
contig22499	97.0271	227.707	199.881	175.47	UP
contig22554	70.0023	122.23	101.204	126.715	UP	AT1G05260	Peroxidase superfamily protein
contig22643	14.4345	25.1187	24.8035	16.9174	UP	AT2G42005	Transmembrane amino acid transporter family protein
contig22730	40.4297	72.5657	92.7883	38.9477	UP	AT4G33010	glycine decarboxylase P-protein 1
contig228	29.5191	70.2067	42.45	26.4537	UP	AT5G25610	BURP domain-containing protein
contig22872	12.1775	22.6188	26.2731	16.604	UP	AT4G37180	Homeodomain-like superfamily protein
contig22919	34.6425	82.8602	72.5	21.4445	UP	AT2G14610	pathogenesis-related gene 1
contig23018	5.80228	20.3492	8.85218	13.5018	UP	AT5G42210	Major facilitator superfamily protein
contig23060	18.7079	52.5196	51.9005	33.7448	UP
contig23069	11.0083	20.9765	13.4119	6.94778	UP
contig23119	17.4651	37.0841	34.1404	17.3107	UP	AT1G20050	C-8 7 sterol isomerase
contig23251	15.8293	30.8674	20.5853	25.3027	UP	AT5G39040	transporter associated with antigen processing protein 2
contig23335	84.4669	184.958	170.813	24.9442	UP	AT3G19690	CAP (Cysteine-rich secretory proteins Antigen 5 and Pathogenesis-related 1 protein) superfamily protein
contig23516	42.5576	107.195	136.303	49.6169	UP	AT5G05340	Peroxidase superfamily protein
contig23518	26.9296	46.6508	86.2155	33.3369	UP	AT4G23270	cysteine-rich RLK (RECEPTOR-like protein kinase) 19
contig23527	9.90227	21.1287	26.4722	13.9631	UP
contig23606	14.4626	43.3114	30.9664	11.508	UP	AT2G37040	PHE ammonia lyase 1
contig23616	94.6005	205.769	128.101	60.9591	UP
contig2362	5.30196	20.0913	25.7464	7.74138	UP	AT3G06483	pyruvate dehydrogenase kinase
contig2363	10.3215	22.9589	17.6157	8.56796	UP	AT1G77210	sugar transporter 14
contig2375	156.911	295.965	209.179	126.854	UP	AT4G39090	Papain family cysteine protease
contig23804	49.9645	88.6872	89.5689	35.7342	UP
contig24032	18.7561	33.4707	38.7803	14.9564	UP	AT4G13010	Oxidoreductase zinc-binding dehydrogenase family protein
contig24066	7.20605	22.2922	9.48484	12.4257	UP	AT3G20870	ZIP metal ion transporter family
contig24192	14.3812	29.0552	35.3311	6.26	UP	AT2G38940	phosphate transporter 1;4
contig24261	14.6624	28.5171	28.1688	6.87082	UP	AT2G27360	GDSL-like Lipase/Acylhydrolase superfamily protein
contig24520	15.9818	33.6398	25.2148	18.3108	UP	AT4G33500	Protein phosphatase 2C family protein
contig24686	24.0442	50.3344	31.2591	22.953	UP
contig24719	62.1139	186.963	43.1636	14.6103	UP
contig24801	10.3069	24.9278	16.7257	20.1935	UP
contig24842	35.5774	64.7853	95.5632	43.6834	UP	AT2G47710	Adenine nucleotide alpha hydrolases-like superfamily protein
contig24845	24.7176	48.6921	20.4604	8.4203	UP	AT3G15730	phospholipase D alpha 1
contig2489	63.4335	113.908	148.243	52.4711	UP	AT5G38820	Transmembrane amino acid transporter family protein
contig25260	24.5608	51.3625	37.5249	22.6741	UP	AT5G05340	Peroxidase superfamily protein
contig25279	13.3367	32.5886	24.3386	8.05716	UP	AT1G77380	amino acid permease 3
contig25414	91.0974	158.453	222.854	47.0193	UP
contig25445	10.8317	33.5186	32.7161	23.9768	UP
contig25487	20.0274	52.7403	42.3422	45.0827	UP	AT2G45180	Bifunctional inhibitor/lipid-transfer protein/seed storage 2S albumin superfamily protein
contig25493	13.2377	22.613	23.7857	8.11941	UP
contig25548	12.9746	99.1067	285.517	21.2975	UP	AT2G16060	hemoglobin 1
contig2555	85.4171	164.572	90.3292	29.507	UP	AT4G16260	Glycosyl hydrolase superfamily protein
contig2556	35.9389	84.0557	72.1167	31.8391	UP	AT4G37900	Protein of unknown function (duplicated DUF1399)
contig25566	26.1024	53.7182	63.2962	42.1275	UP	AT4G02600	Seven transmembrane MLO family protein
contig2557	4.43242	20.3599	57.0142	30.385	UP	AT4G37900	Protein of unknown function (duplicated DUF1399)
contig2563	9.37137	28.995	37.1199	9.12206	UP	AT5G39110	RmlC-like cupins superfamily protein
contig25649	75.4228	195.453	218.127	79.6777	UP	AT3G49340	Cysteine proteinases superfamily protein
contig25725	10.215	25.1621	34.7045	13.9614	UP	AT1G80530	Major facilitator superfamily protein
contig25820	28.7862	61.7511	43.3974	29.3005	UP
contig2584	132.541	291.198	311.72	122.44	UP	AT4G00430	plasma membrane intrinsic protein 1;4
contig2593	41.0374	71.4399	108.534	45.9118	UP	AT3G30390	Transmembrane amino acid transporter family protein
contig26081	8.55283	26.9474	18.6006	6.04345	UP	AT2G24100	unknown protein; BEST Arabidopsis thaliana protein match is: unknown protein (TAIR:AT4G30780.1); Has 101 Blast hits to 101 proteins in 16 species: Archae - 0; Bacteria - 0; Metazoa - 0; Fungi - 0; Plants - 95; Viruses - 0; Other Eukaryotes - 6 (source: NCBI BLink).
contig26082	27.71	65.3815	50.7793	36.7863	UP
contig26086	69.0545	145.622	85.8	72.0808	UP
contig26249	2.12293	32.0931	9.12995	13.2032	UP	AT5G39040	transporter associated with antigen processing protein 2
contig2655	28.043	67.105	105.46	30.2207	UP	AT1G76550	Phosphofructokinase family protein
contig26579	31.5968	62.622	48.2667	13.9212	UP	AT1G71695	Peroxidase superfamily protein
contig2663	282.696	625.566	715.214	275.245	UP	AT3G10340	phenylalanine ammonia-lyase 4
contig26698	11.1336	25.0704	41.1518	19.2367	UP	AT5G22920	CHY-type/CTCHY-type/RING-type Zinc finger protein
contig26736	16.8066	33.8797	29.3698	11.4428	UP	AT2G37040	PHE ammonia lyase 1
contig26796	35.7969	73.4118	98.9792	37.9506	UP	AT4G34970	actin depolymerizing factor 9
contig26797	10.6049	25.4984	34.8172	10.6448	UP	AT1G80530	Major facilitator superfamily protein
contig26800	6.82056	22.09	19.0273	7.33278	UP
contig26885	8.98011	20.2248	24.7454	11.8785	UP	AT5G07990	Cytochrome P450 superfamily protein
contig26898	10.038	38.0781	26.5581	10.4158	UP	AT5G58390	Peroxidase superfamily protein
contig26943	6.80534	27.0103	22.7236	6.55384	UP
contig27033	20.6586	51.1158	34.9803	28.6294	UP	AT1G60140	trehalose phosphate synthase
contig27182	11.2055	22.011	22.3125	8.80975	UP	AT3G26300	cytochrome P450 family 71 subfamily B polypeptide 34
contig27283	13.8866	36.6486	41.785	11.0285	UP
contig27322	9.0778	20.8627	37.6266	11.9719	UP	AT4G21390	S-locus lectin protein kinase family protein
contig27329	11.0376	21.9834	20.6533	17.1154	UP	AT4G11290	Peroxidase superfamily protein
contig27330	26.426	47.5374	38.135	28.1015	UP	AT4G11290	Peroxidase superfamily protein
contig27368	19.6112	33.4569	8.11182	5.65714	UP	AT2G37040	PHE ammonia lyase 1
contig27544	18.4626	40.1633	62.2324	22.1358	UP	AT3G12500	basic chitinase
contig2773	9.98094	20.9253	23.3067	8.14887	UP	AT5G05340	Peroxidase superfamily protein
contig27791	15.1216	36.2293	34.5288	14.8458	UP	AT1G74790	catalytics
contig27862	64.9594	149.737	93.4672	31.4055	UP	AT5G37820	NOD26-like intrinsic protein 4;2
contig27927	15.0708	31.8465	25.1344	15.668	UP	AT1G05260	Peroxidase superfamily protein
contig27961	50.4875	96.5602	132.591	61.8576	UP	AT1G56070	Ribosomal protein S5/Elongation factor G/III/V family protein
contig27991	10.4696	25.4484	50.4864	3.99388	UP	AT4G10510	Subtilase family protein
contig2802	18.4571	50.9819	29.3156	12.3383	UP	AT5G55180	O-Glycosyl hydrolases family 17 protein
contig2820	22.7942	58.7792	110.939	31.0924	UP	AT4G26270	phosphofructokinase 3
contig2821	36.627	78.1625	147.161	50.7287	UP	AT4G26270	phosphofructokinase 3
contig28273	44.5407	85.9099	114.493	41.3767	UP	AT5G62700	tubulin beta chain 3
contig28528	39.587	78.0161	53.6446	54.3367	UP	AT1G02335	germin-like protein subfamily 2 member 2 precursor
contig28679	12.1864	23.5832	13.3125	6.22737	UP	AT2G37040	PHE ammonia lyase 1
contig28688	15.4323	30.5961	28.9396	17.0059	UP	AT5G51890	Peroxidase superfamily protein
contig28761	120.216	220.78	149.895	46.2234	UP	AT5G39160	RmlC-like cupins superfamily protein
contig28763	21.596	51.8219	65.0269	27.1394	UP	AT5G36250	Protein phosphatase 2C family protein
contig2878	72.3269	142.525	179.968	51.8413	UP	AT4G30190	H(+)-ATPase 2
contig28794	18.3759	40.336	29.03	20.7743	UP
contig28801	12.3516	21.6039	18.8862	9.01848	UP	AT4G17880	Basic helix-loop-helix (bHLH) DNA-binding family protein
contig28979	65.2106	117.663	108.946	68.9102	UP
contig28980	39.9295	78.334	68.1302	31.206	UP
contig29090	16.0986	37.1128	34.117	14.0483	UP	AT2G42600	phosphoenolpyruvate carboxylase 2
contig29165	35.6418	74.6708	81.9498	40.0035	UP	AT5G35630	glutamine synthetase 2
contig29246	10.4399	21.429	42.9761	11.4088	UP	AT4G13510	ammonium transporter 1;1
contig2929	33.0787	63.3837	62.7231	28.2564	UP	AT1G09740	Adenine nucleotide alpha hydrolases-like superfamily protein
contig29295	21.5043	36.6877	26.0016	24.8066	UP
contig29317	10.4716	20.962	17.8743	8.36797	UP	AT5G48930	hydroxycinnamoyl-CoA shikimate/quinate hydroxycinnamoyl transferase
contig29333	15.5995	28.3917	30.9813	11.0943	UP	AT5G24890	unknown protein; FUNCTIONS IN: molecular_function unknown; INVOLVED IN: biological_process unknown; LOCATED IN: cellular_component unknown; EXPRESSED IN: 24 plant structures; EXPRESSED DURING: 13 growth stages; BEST Arabidopsis thaliana protein match is: unknown protein (TAIR:AT2G24550.1); Has 1807 Blast hits to 1807 proteins in 277 species: Archae - 0; Bacteria - 0; Metazoa - 736; Fungi - 347; P…
contig29563	10.6499	20.8914	10.4914	9.7592	UP
contig29602	11.1701	20.2714	14.2244	5.21509	UP	AT1G50180	NB-ARC domain-containing disease resistance protein
contig2986	188.723	969.658	271.707	432.447	UP	AT4G14716	acireductone dioxygenase 1
contig299	12.1714	22.7054	23.6139	8.01567	UP	AT5G15870	glycosyl hydrolase family 81 protein
contig300	25.4508	47.0748	38.6581	16.615	UP	AT5G15870	glycosyl hydrolase family 81 protein
contig30118	58.2996	99.3306	142.368	48.3453	UP	AT1G70410	beta carbonic anhydrase 4
contig30253	17.4858	30.3627	29.9738	14.9608	UP	AT5G11950	Putative lysine decarboxylase family protein
contig30520	35.1881	110.183	44.9379	71.6527	UP	AT1G49820	S-methyl-5-thioribose kinase
contig30540	22.7216	43.1869	36.3777	24.0256	UP	AT1G79620	Leucine-rich repeat protein kinase family protein
contig30639	10.3818	23.7011	14.5901	7.27298	UP	AT3G15730	phospholipase D alpha 1
contig30707	30.8356	192.526	384.499	52.4977	UP	AT2G16060	hemoglobin 1
contig30907	13.9282	23.8612	27.5142	12.4301	UP	AT5G64550	loricrin-related
contig30939	29.6784	51.3653	33.2722	31.1193	UP	AT1G65680	expansin B2
contig30941	20.8165	35.6257	32.7997	18.9232	UP
contig31027	18.0581	41.9083	37.3868	16.9466	UP	AT5G05340	Peroxidase superfamily protein
contig3105	45.0176	78.6451	80.4176	47.7468	UP	AT3G03080	Zinc-binding dehydrogenase family protein
contig3109	35.3712	79.0949	81.5042	43.1567	UP	AT1G11260	sugar transporter 1
contig31090	4.05531	29.8442	13.7602	16.6427	UP	AT5G53550	YELLOW STRIPE like 3
contig31136	21.8296	77.8398	39.2328	18.6783	UP	AT2G05790	O-Glycosyl hydrolases family 17 protein
contig31152	14.1699	37.6074	43.9757	11.7464	UP	AT5G09810	actin 7
contig3120	27.4322	55.3957	66.0843	21.711	UP	AT1G44170	aldehyde dehydrogenase 3H1
contig31463	16.5957	30.826	102.94	54.9942	UP	AT4G17260	Lactate/malate dehydrogenase family protein
contig3147	16.0005	32.2236	24.5186	18.7664	UP	AT4G06744	Leucine-rich repeat (LRR) family protein
contig31511	22.1608	40.2073	47.4449	12.4436	UP	AT2G38940	phosphate transporter 1;4
contig31516	13.9759	24.3151	28.924	16.5418	UP	AT4G38620	myb domain protein 4
contig3163	83.7852	210.362	220.352	64.1783	UP	AT3G53420	plasma membrane intrinsic protein 2A
contig31636	8.88262	28.2448	34.6929	9.07625	UP	AT5G07990	Cytochrome P450 superfamily protein
contig3177	30.7612	60.7139	92.0032	28.6046	UP	AT3G47340	glutamine-dependent asparagine synthase 1
contig32068	23.5921	41.0888	30.5137	18.8589	UP	AT3G21280	ubiquitin-specific protease 7
contig3208	404.043	687.517	287.158	146.31	UP	AT2G33830	Dormancy/auxin associated family protein
contig32384	11.2088	20.176	11.8967	13.0512	UP	AT2G17640	Trimeric LpxA-like enzymes superfamily protein
contig32519	14.6638	32.8876	24.4004	15.7428	UP	AT4G33500	Protein phosphatase 2C family protein
contig32534	12.6164	25.5132	21.873	15.8139	UP	AT2G45530	RING/U-box superfamily protein
contig32540	28.5722	54.1789	34.5105	32.596	UP	AT5G07130	laccase 13
contig3259	37.5857	91.7852	91.1449	50.3387	UP	AT5G05340	Peroxidase superfamily protein
contig32595	9.80067	20.0043	82.8562	26.6418	UP	AT2G35510	similar to RCD one 1
contig32678	12.2773	20.8157	21.3311	10.7471	UP	AT2G35680	Phosphotyrosine protein phosphatases superfamily protein
contig32750	10.1463	23.1608	21.5148	7.45894	UP	AT1G76350	Plant regulator RWP-RK family protein
contig32789	14.638	35.9051	21.0194	7.21688	UP	AT4G37070	Acyl transferase/acyl hydrolase/lysophospholipase superfamily protein
contig32850	26.786	47.3023	60.3322	22.0061	UP	AT5G05340	Peroxidase superfamily protein
contig32859	121.052	364.379	406.41	84.8332	UP	AT3G53420	plasma membrane intrinsic protein 2A
contig32966	12.4281	23.1009	24.7638	8.50868	UP	AT5G01520	RING/U-box superfamily protein
contig33371	14.1362	26.2066	39.6593	14.7083	UP	AT2G03500	Homeodomain-like superfamily protein
contig33392	197.007	544.471	297.119	210.717	UP
contig335	24.1789	56.0234	55.0579	30.1137	UP	AT1G11260	sugar transporter 1
contig33619	6.3335	22.2901	25.7047	3.53688	UP	AT2G42600	phosphoenolpyruvate carboxylase 2
contig33654	20.5103	42.532	62.1662	11.7551	UP	AT5G39120	RmlC-like cupins superfamily protein
contig33682	36.4237	67.374	68.0196	30.8055	UP
contig33887	35.9928	74.6727	59.0093	41.6334	UP	AT4G33420	Peroxidase superfamily protein
contig33918	41.7876	93.7745	108.964	67.9826	UP	AT5G05340	Peroxidase superfamily protein
contig3399	23.7918	40.0482	51.25	14.6459	UP	AT1G21270	wall-associated kinase 2
contig34029	15.5632	26.6951	15.6035	18.1341	UP	AT5G24800	basic leucine zipper 9
contig34122	21.7627	41.6909	34.154	23.0928	UP	AT1G05260	Peroxidase superfamily protein
contig34236	17.0445	36.5196	47.6107	23.5721	UP
contig34278	9.88961	20.0318	40.6047	15.8567	UP	AT1G77760	nitrate reductase 1
contig3428	50.3536	88.1835	115.102	43.2583	UP	AT3G09840	cell division cycle 48
contig34491	10.8936	20.9644	13.8686	10.6582	UP	AT2G39730	rubisco activase
contig34519	15.3046	31.513	38.5531	11.7882	UP	AT3G23430	phosphate 1
contig3459	30.6432	72.6029	57.5763	23.5387	UP	AT2G46750	D-arabinono-1 4-lactone oxidase family protein
contig34654	8.94062	25.5815	16.2012	5.666	UP	AT3G21520	DUF679 domain membrane protein 1
contig34710	35.1437	92.4499	109.114	30.6906	UP	AT2G15890	maternal effect embryo arrest 14
contig34889	22.2364	47.7999	43.4537	34.3324	UP	AT1G65680	expansin B2
contig34964	23.645	43.4275	39.2533	10.291	UP	AT3G21520	DUF679 domain membrane protein 1
contig34989	43.6648	109.765	163.232	22.1962	UP	AT3G54700	phosphate transporter 1;7
contig3524	37.3646	76.6595	78.1244	32.3702	UP	AT2G39940	RNI-like superfamily protein
contig3527	33.6529	68.7633	54.5459	46.6953	UP
contig3528	22.0626	37.798	28.3622	25.6901	UP
contig35329	9.60063	20.5556	29.9692	10.1677	UP
contig36220	7.95628	32.7857	23.8234	10.566	UP	AT1G05260	Peroxidase superfamily protein
contig3636	20.9052	37.7486	45.6764	17.1135	UP	AT1G58030	cationic amino acid transporter 2
contig36443	14.8146	49.349	289.807	49.3909	UP	AT5G25940	early nodulin-related
contig36488	15.4717	32.901	31.7521	20.287	UP	AT4G12730	FASCICLIN-like arabinogalactan 2
contig3668	21.3369	44.0415	32.8001	16.9614	UP	AT2G39940	RNI-like superfamily protein
contig36713	67.0171	155.685	108.916	72.5994	UP	AT5G01320	Thiamine pyrophosphate dependent pyruvate decarboxylase family protein
contig36767	10.7683	20.5115	21.4986	12.5017	UP
contig36833	22.6503	40.6792	41.7616	25.0853	UP	AT5G10560	Glycosyl hydrolase family protein
contig36897	22.8749	40.7833	44.8433	21.4709	UP	AT1G64190	6-phosphogluconate dehydrogenase family protein
contig369	32.8279	57.617	47.0377	20.9826	UP	AT1G65820	microsomal glutathione s-transferase putative
contig3694	11.2027	20.699	12.2872	9.40657	UP	AT2G40540	potassium transporter 2
contig37000	14.4198	29.3313	34.0064	10.5088	UP	AT5G17540	HXXXD-type acyl-transferase family protein
contig37097	71.1263	131.632	61.1073	96.8917	UP	AT1G02335	germin-like protein subfamily 2 member 2 precursor
contig37194	41.6329	79.2948	79.8617	64.3725	UP
contig37357	24.0831	49.7267	22.5518	30.9358	UP
contig37358	9.98455	22.0005	12.285	10.1173	UP	AT5G06800	myb-like HTH transcriptional regulator family protein
contig37573	12.1417	26.1602	18.5044	17.5341	UP
contig37691	13.1236	23.0179	21.1256	9.80575	UP	AT2G41860	calcium-dependent protein kinase 14
contig37782	7.6464	39.4244	24.1905	22.6517	UP	AT5G53550	YELLOW STRIPE like 3
contig37792	18.9923	56.4051	49.7482	14.1286	UP	AT1G15740	Leucine-rich repeat family protein
contig38317	361.148	860.409	673.419	597.862	UP	AT4G12470	azelaic acid induced 1
contig38337	7.9684	20.0017	11.7417	10.2461	UP	AT5G18490	Plant protein of unknown function (DUF946)
contig3837	113.169	203.124	262.075	96.46	UP	AT2G37040	PHE ammonia lyase 1
contig38380	11.726	27.0817	69.2494	20.6892	UP	AT2G47710	Adenine nucleotide alpha hydrolases-like superfamily protein
contig38442	11.501	30.3205	29.4973	25.2642	UP
contig3852	19.1324	34.7231	30.9468	31.6335	UP
contig38627	23.3591	43.455	64.9419	32.2594	UP	AT4G17260	Lactate/malate dehydrogenase family protein
contig38697	30.1732	77.6053	296.22	116.687	UP
contig3901	26.6604	47.0944	50.8631	20.3604	UP	AT1G70170	matrix metalloproteinase
contig39079	41.6197	133.706	24.59	8.57441	UP
contig39124	13.3853	42.5387	13.054	13.8399	UP	AT5G23370	GRAM domain-containing protein / ABA-responsive protein-related
contig3926	646.617	1370.84	793.109	600.691	UP
contig393	26.3965	51.4268	44.8022	31.7178	UP	AT5G51890	Peroxidase superfamily protein
contig39318	8.8305	23.5031	22.335	11.7104	UP	AT3G01190	Peroxidase superfamily protein
contig395	12.8068	26.4816	20.3241	13.0421	UP	AT1G14520	myo-inositol oxygenase 1
contig39548	366.758	713.074	617.692	170.033	UP	AT3G09390	metallothionein 2A
contig39634	13.0328	24.4807	14.311	12.585	UP
contig3984	24.0213	53.1103	47.7028	24.7721	UP	AT2G34080	Cysteine proteinases superfamily protein
contig39903	5.33167	20.1353	10.9463	13.8058	UP	AT4G34950	Major facilitator superfamily protein
contig4013	60.9236	189.139	145.026	91.9413	UP	AT1G48600	S-adenosyl-L-methionine-dependent methyltransferases superfamily protein
contig40183	15.2958	27.1664	11.0608	13.9649	UP
contig402	9.67085	22.6253	35.9453	7.48897	UP	AT1G03610	Protein of unknown function (DUF789)
contig40316	10.7449	20.3193	22.2706	8.83659	UP
contig40356	15.0624	30.786	66.7859	13.5466	UP	AT2G15890	maternal effect embryo arrest 14
contig40367	8.80087	26.4557	14.9315	11.5525	UP	AT3G48360	BTB and TAZ domain protein 2
contig40483	24.3946	219.081	50.8691	82.0652	UP	AT3G07720	Galactose oxidase/kelch repeat superfamily protein
contig40560	6.22982	64.1285	17.7609	11.3423	UP	AT1G63440	heavy metal atpase 5
contig40561	10.0449	54.2832	25.8543	12.381	UP	AT1G63440	heavy metal atpase 5
contig4084	67.386	131.378	158.25	62.8039	UP	AT1G56070	Ribosomal protein S5/Elongation factor G/III/V family protein
contig4100	71.4711	139.849	117.755	46.7578	UP	AT5G62740	SPFH/Band 7/PHB domain-containing membrane-associated protein family
contig41254	29.5408	52.4585	28.5226	27.5641	UP
contig41316	23.3487	42.9753	24.5787	19.1756	UP	AT3G15730	phospholipase D alpha 1
contig4144	9.10315	21.8512	19.7744	8.51753	UP	AT1G21240	wall associated kinase 3
contig41574	14.357	37.172	42.0579	12.3333	UP	AT2G37040	PHE ammonia lyase 1
contig41710	8.59393	20.9933	50.1391	10.7715	UP
contig4191	13.1058	24.5982	26.1062	9.27075	UP	AT5G16880	Target of Myb protein 1
contig41934	15.6745	30.1523	36.9938	9.80606	UP
contig42336	26.0272	60.7957	55.3969	25.1219	UP	AT1G56145	Leucine-rich repeat transmembrane protein kinase
contig4256	31.7659	92.3271	47.3978	27.4187	UP	AT1G55120	beta-fructofuranosidase 5
contig42575	22.7841	40.3517	51.2279	27.8069	UP
contig42711	227.931	822.909	482.933	217.462	UP	AT1G64160	Disease resistance-responsive (dirigent-like protein) family protein
contig43017	32.002	61.0093	49.9783	31.6173	UP	AT5G35525	PLAC8 family protein
contig43024	17.3885	31.9659	31.3926	24.2879	UP
contig43125	15.1715	30.7523	29.8782	13.6212	UP	AT1G65680	expansin B2
contig43430	32.5673	73.7509	100.733	31.3693	UP	AT5G37600	glutamine synthase clone R1
contig43571	24.7166	149.507	223.288	4.50356	UP	AT1G77120	alcohol dehydrogenase 1
contig43722	18.5227	46.0854	331.802	95.0481	UP
contig4380	89.6139	189.304	96.9018	31.271	UP	AT4G16260	Glycosyl hydrolase superfamily protein
contig43952	4.29075	21.5546	15.4237	9.18163	UP	AT3G55840	Hs1pro-1 protein
contig44031	4.254	20.0624	32.8009	11.4925	UP	AT2G20670	Protein of unknown function (DUF506)
contig4404	76.1017	232.58	337.078	73.2078	UP	AT4G33070	Thiamine pyrophosphate dependent pyruvate decarboxylase family protein
contig4405	46.6064	115.875	155.833	41.2905	UP	AT4G33070	Thiamine pyrophosphate dependent pyruvate decarboxylase family protein
contig44215	68.9877	125.19	78.8004	63.9319	UP	AT3G10340	phenylalanine ammonia-lyase 4
contig44866	14.4696	28.5202	93.7318	27.2676	UP	AT1G03475	Coproporphyrinogen III oxidase
contig44899	10.7979	22.4711	31.6269	5.46385	UP	AT3G09220	laccase 7
contig45236	11.3971	24.8473	17.8723	15.4747	UP	AT1G32170	xyloglucan endotransglucosylase/hydrolase 30
contig4540	108.656	185.751	181.735	93.2909	UP	AT3G02520	general regulatory factor 7
contig45409	23.2421	67.1515	44.289	24.9479	UP
contig45429	59.5939	152.765	108.432	51.6384	UP
contig45544	10.2495	24.6112	24.6037	19.124	UP	AT3G49340	Cysteine proteinases superfamily protein
contig45553	8.42994	69.7327	31.7249	12.6882	UP	AT5G47560	tonoplast dicarboxylate transporter
contig45639	36.1711	63.9489	37.9829	24.7993	UP
contig45682	27.0912	46.4946	52.6599	27.7519	UP
contig45698	8.06821	20.4908	31.8268	10.0105	UP	AT5G14700	NAD(P)-binding Rossmann-fold superfamily protein
contig4571	153.704	296.814	527.832	145.539	UP	AT3G52990	Pyruvate kinase family protein
contig45855	11.4319	21.0307	28.1796	17.2985	UP	AT5G47390	myb-like transcription factor family protein
contig45946	88.5949	158.28	90.2532	39.2464	UP	AT5G39160	RmlC-like cupins superfamily protein
contig46200	15.9683	28.4009	15.7269	15.4594	UP
contig46448	7.33785	20.1934	29.4595	12.2103	UP
contig46449	11.5104	22.1528	22.5337	11.8033	UP	AT5G44340	tubulin beta chain 4
contig46584	14.0478	35.2418	26.2482	14.7988	UP	AT1G14870	PLANT CADMIUM RESISTANCE 2
contig4662	9.24422	21.2107	14.0571	10.5129	UP	AT4G37870	phosphoenolpyruvate carboxykinase 1
contig46662	12.1411	81.1103	20.8745	24.9515	UP	AT1G52120	Mannose-binding lectin superfamily protein
contig46666	40.5216	82.9652	73.6581	37.3116	UP	AT5G65600	Concanavalin A-like lectin protein kinase family protein
contig46748	14.1827	26.1894	30.688	11.1056	UP	AT5G61500	autophagy 3 (APG3)
contig47102	13.909	28.8678	33.9038	15.1351	UP	AT5G47910	respiratory burst oxidase homologue D
contig47133	11.6704	23.3399	35.9164	14.9228	UP	AT4G27470	RING membrane-anchor 3
contig4740	990.157	2015.51	4279.69	694.717	UP	AT1G13440	glyceraldehyde-3-phosphate dehydrogenase C2
contig47410	11.0241	45.212	64.2532	22.9657	UP
contig47431	22.461	42.555	79.254	25.0379	UP	AT1G25280	tubby like protein 10
contig47757	16.4768	30.3729	31.0769	10.5488	UP
contig4800	24.5375	177.3	262.986	12.3591	UP	AT1G77120	alcohol dehydrogenase 1
contig4801	94.7666	355.115	383.717	38.3368	UP	AT1G77120	alcohol dehydrogenase 1
contig48112	13.7864	23.3157	25.8307	11.0493	UP	AT5G06580	FAD-linked oxidases family protein
contig48599	6.38739	21.2902	13.0171	6.38021	UP	AT2G44230	Plant protein of unknown function (DUF946)
contig48741	20.4268	53.1561	26.6897	17.165	UP
contig48814	8.65187	20.7307	25.5488	5.48943	UP
contig4915	192.384	387.087	556.488	140.163	UP	AT5G19140	Aluminium induced protein with YGL and LRDR motifs
contig49475	15.1159	27.2719	30.8749	12.2217	UP
contig49516	12.5531	33.8204	96.1811	30.6726	UP
contig49517	12.9442	44.1149	123.372	24.9803	UP
contig49633	11.2919	21.0388	21.7531	8.97044	UP	AT4G27745	Yippee family putative zinc-binding protein
contig49837	14.4976	32.2312	23.9308	6.41297	UP	AT2G16050	Cysteine/Histidine-rich C1 domain family protein
contig49862	162.249	345.034	70.5445	43.212	UP
contig49863	5.67428	20.9765	8.22112	4.01554	UP
contig49959	7.39915	27.7395	25.4766	6.13981	UP	AT3G53260	phenylalanine ammonia-lyase 2
contig50087	19.3361	41.7036	68.8769	40.7675	UP	AT2G45180	Bifunctional inhibitor/lipid-transfer protein/seed storage 2S albumin superfamily protein
contig50180	15.161	31.9769	16.2844	9.80667	UP	AT2G43330	inositol transporter 1
contig50497	9.68729	28.7085	18.9562	18.9316	UP	AT2G28160	FER-like regulator of iron uptake
contig50555	6.77305	21.2953	20.2957	7.55784	UP	AT1G63440	heavy metal atpase 5
contig50749	20.8911	35.4462	43.5399	26.2759	UP	AT2G06025	Acyl-CoA N-acyltransferases (NAT) superfamily protein
contig50845	16.2475	62.5515	70.271	22.8771	UP	AT3G06483	pyruvate dehydrogenase kinase
contig5089	13.8363	25.7967	38.3932	6.21607	UP	AT3G14690	cytochrome P450 family 72 subfamily A polypeptide 15
contig512	44.2394	84.1281	81.9928	39.8519	UP	AT5G24090	chitinase A
contig51526	9.72823	21.3996	7.98359	11.2404	UP
contig51674	4.88444	26.2124	17.5273	4.92645	UP	AT2G17850	Rhodanese/Cell cycle control phosphatase superfamily protein
contig5177	22.9459	45.3012	56.494	13.4869	UP	AT5G47040	lon protease 2
contig51861	4.3595	29.5489	12.7638	9.09208	UP
contig52080	10.3378	24.4458	75.1082	22.3517	UP
contig5222	14.3554	37.5543	35.4483	29.6227	UP
contig523	104.996	375.33	418.388	76.2423	UP	AT1G77120	alcohol dehydrogenase 1
contig5254	21.8558	40.9941	42.7126	19.8538	UP	AT5G24890	unknown protein; FUNCTIONS IN: molecular_function unknown; INVOLVED IN: biological_process unknown; LOCATED IN: cellular_component unknown; EXPRESSED IN: 24 plant structures; EXPRESSED DURING: 13 growth stages; BEST Arabidopsis thaliana protein match is: unknown protein (TAIR:AT2G24550.1); Has 1807 Blast hits to 1807 proteins in 277 species: Archae - 0; Bacteria - 0; Metazoa - 736; Fungi - 347; P…
contig52544	17.1375	29.8464	30.3439	6.86604	UP	AT1G20050	C-8 7 sterol isomerase
contig53223	11.9181	24.4762	21.895	8.79054	UP	AT5G06370	NC domain-containing protein-related
contig53487	12.3556	23.1536	18.1113	13.563	UP	AT1G13080	cytochrome P450 family 71 subfamily B polypeptide 2
contig53499	10.4394	22.0379	14.7482	13.9617	UP	AT3G46540	ENTH/VHS family protein
contig53500	27.4383	49.425	31.6464	29.6683	UP	AT3G46540	ENTH/VHS family protein
contig53865	21.1539	50.2297	55.0678	12.7547	UP	AT5G45540	Protein of unknown function (DUF594)
contig53940	46.4253	190.855	257.327	38.0305	UP	AT5G45890	senescence-associated gene 12
contig54031	10.9323	22.7971	12.8016	10.5834	UP	AT4G33920	Protein phosphatase 2C family protein
contig54126	19.295	34.6027	21.5859	24.5645	UP	AT1G63440	heavy metal atpase 5
contig54150	15.5787	39.7588	21.9506	13.8661	UP	AT1G59970	Matrixin family protein
contig5419	27.0955	46.1471	33.3394	19.3837	UP	AT2G14170	aldehyde dehydrogenase 6B2
contig54817	10.4813	22.0439	17.0877	10.581	UP
contig55145	11.8002	25.6621	15.0175	12.9501	UP	AT2G30933	Carbohydrate-binding X8 domain superfamily protein
contig55314	8.43173	26.075	26.3872	17.3926	UP	AT5G63160	BTB and TAZ domain protein 1
contig55332	14.0503	25.5874	19.8586	21.1553	UP	AT5G57550	xyloglucan endotransglucosylase/hydrolase 25
contig55342	27.4734	54.6266	52.3567	18.4632	UP	AT2G32720	cytochrome B5 isoform B
contig55476	7.84288	30.7509	96.5961	36.7355	UP	AT5G25940	early nodulin-related
contig55484	27.5238	64.8427	29.9761	25.3114	UP	AT5G05340	Peroxidase superfamily protein
contig56028	17.4599	31.8665	27.3474	20.5346	UP	AT4G11290	Peroxidase superfamily protein
contig56043	17.064	36.7225	29.1089	14.3723	UP	AT5G15180	Peroxidase superfamily protein
contig56699	12.4421	25.2622	14.9681	8.06407	UP	AT2G37040	PHE ammonia lyase 1
contig56857	27.7221	49.3159	38.8132	40.0922	UP	AT1G05260	Peroxidase superfamily protein
contig56925	23.0911	42.0674	169.025	24.9683	UP
contig57089	39.3307	168.676	355.894	67.7657	UP	AT5G25940	early nodulin-related
contig57169	13.0373	27.5541	32.0573	6.53393	UP	AT3G53260	phenylalanine ammonia-lyase 2
contig573	27.3015	52.8193	110.932	20.3577	UP	AT1G17290	alanine aminotransferas
contig57301	24.4832	51.6657	36.5056	31.5686	UP	AT5G02260	expansin A9
contig57313	9.76393	21.8922	5.04656	4.38102	UP	AT3G48740	Nodulin MtN3 family protein
contig5735	13.6471	22.9542	24.844	7.50876	UP	AT1G61250	secretory carrier 3
contig57536	13.7761	25.2471	19.1692	14.8361	UP	AT4G05030	Copper transport protein family
contig57964	9.10822	23.5926	24.3424	23.0418	UP
contig58116	14.3915	35.7701	123.1	24.5937	UP	AT1G19530	unknown protein; FUNCTIONS IN: molecular_function unknown; INVOLVED IN: N-terminal protein myristoylation anaerobic respiration; LOCATED IN: cellular_component unknown; EXPRESSED IN: leaf apex inflorescence meristem hypocotyl root flower; EXPRESSED DURING: petal differentiation and expansion stage; Has 47 Blast hits to 47 proteins in 13 species: Archae - 0; Bacteria - 0; Metazoa - 0; Fungi - 0; P…
contig58157	22.6709	50.359	28.4629	15.9255	UP	AT4G15610	Uncharacterised protein family (UPF0497)
contig582	16.0029	29.5506	75.4208	26.0588	UP
contig58422	7.20883	22.3815	122.899	25.2716	UP
contig5858	100.755	270.44	161.832	86.9774	UP	AT3G62760	Glutathione S-transferase family protein
contig58741	15.119	57.94	74.4113	10.8949	UP	AT1G77330	2-oxoglutarate (2OG) and Fe(II)-dependent oxygenase superfamily protein
contig5883	5.25089	38.5372	14.4207	9.99128	UP	AT1G63440	heavy metal atpase 5
contig5896	9.2351	29.0668	27.8673	15.3638	UP
contig59033	11.4364	31.0944	40.8769	6.95931	UP	AT5G54160	O-methyltransferase 1
contig5909	16.7454	31.3162	28.3245	10.9054	UP	AT5G62740	SPFH/Band 7/PHB domain-containing membrane-associated protein family
contig59091	18.1215	31.7971	35.2446	16.5239	UP	AT4G34150	Calcium-dependent lipid-binding (CaLB domain) family protein
contig59283	39.1519	78.9973	181.011	27.7419	UP	AT3G54700	phosphate transporter 1;7
contig59336	5.7304	22.1415	14.7276	5.52931	UP
contig59715	12.0748	54.9276	22.1035	11.7459	UP	AT1G76800	Vacuolar iron transporter (VIT) family protein
contig59813	24.7277	44.7016	30.2063	34.6918	UP
contig60	1773.8	3598.99	1778.19	6214.1	UP
contig6019	176.678	320.745	222.455	147.057	UP	AT3G62760	Glutathione S-transferase family protein
contig60190	6.92684	22.6054	21.8373	8.32934	UP	AT5G50760	SAUR-like auxin-responsive protein family
contig60471	30.7474	61.7393	17.0998	24.9196	UP	AT5G37820	NOD26-like intrinsic protein 4;2
contig6052	119.568	218.735	236.366	103.734	UP	AT3G57260	beta-1 3-glucanase 2
contig60559	8.2387	24.7611	17.0506	16.3511	UP	AT5G63160	BTB and TAZ domain protein 1
contig60843	5.33251	22.5667	24.2013	5.45681	UP
contig61108	176.469	373.056	311.297	155.374	UP
contig616	205.781	350.37	261.711	260.85	UP	AT3G17390	S-adenosylmethionine synthetase family protein
contig61631	29.2188	53.5277	44.6303	35.2295	UP	AT4G11290	Peroxidase superfamily protein
contig61955	12.6761	24.6645	20.8219	11.8894	UP	AT4G01630	expansin A17
contig6196	51.6561	141.077	72.8838	24.5681	UP	AT3G06390	Uncharacterised protein family (UPF0497)
contig62270	17.1733	29.6831	35.1766	17.3366	UP	AT1G64190	6-phosphogluconate dehydrogenase family protein
contig62698	22.0225	38.922	16.5118	16.0893	UP
contig62976	11.1765	24.9893	17.7382	8.53088	UP	AT3G53260	phenylalanine ammonia-lyase 2
contig6338	14.2826	31.1608	58.6601	21.7277	UP	AT2G24550	unknown protein; BEST Arabidopsis thaliana protein match is: unknown protein (TAIR:AT4G31510.1); Has 219 Blast hits to 219 proteins in 33 species: Archae - 0; Bacteria - 0; Metazoa - 16; Fungi - 2; Plants - 184; Viruses - 0; Other Eukaryotes - 17 (source: NCBI BLink).
contig6342	22.8665	58.3967	99.5912	52.6617	UP
contig63595	17.8428	84.4936	101.129	15.4114	UP
contig63618	20.0458	38.4988	24.1442	24.7819	UP	AT1G20190	expansin 11
contig64092	8.17567	21.2458	11.068	12.9211	UP	AT5G05340	Peroxidase superfamily protein
contig6434	226.355	432.421	540.656	171.556	UP	AT2G18960	H(+)-ATPase 1
contig64530	14.9545	29.2117	12.2482	17.0839	UP	AT4G34050	S-adenosyl-L-methionine-dependent methyltransferases superfamily protein
contig64858	8.44686	20.3007	14.8501	13.0394	UP	AT1G62280	SLAC1 homologue 1
contig65013	21.0045	38.5469	26.1397	18.7491	UP
contig65163	20.4746	40.5712	76.8165	11.7324	UP	AT3G54700	phosphate transporter 1;7
contig6630	23.6785	101.929	70.6186	17.6526	UP	AT1G68020	UDP-Glycosyltransferase / trehalose-phosphatase family protein
contig66426	18.9079	99.8724	42.6224	38.2713	UP	AT5G23370	GRAM domain-containing protein / ABA-responsive protein-related
contig66637	8.5785	22.4018	23.2644	11.1864	UP	AT5G05340	Peroxidase superfamily protein
contig6730	19.2962	41.2629	69.7228	19.8948	UP	AT4G10540	Subtilase family protein
contig67914	12.6936	22.7388	14.0395	10.9043	UP	AT1G02170	metacaspase 1
contig68115	316.539	1111.24	696.863	254.01	UP
contig6812	11.9287	23.4231	24.6963	9.8486	UP	AT3G45640	mitogen-activated protein kinase 3
contig6816	83.9	165.843	112.571	39.6735	UP	AT5G37820	NOD26-like intrinsic protein 4;2
contig6823	29.766	50.4922	54.0648	31.7007	UP	AT3G21420	2-oxoglutarate (2OG) and Fe(II)-dependent oxygenase superfamily protein
contig68512	10.8815	42.1849	20.1004	33.5126	UP
contig6853	16.1003	55.2858	22.5215	21.6331	UP	AT1G76800	Vacuolar iron transporter (VIT) family protein
contig68730	12.1754	24.1667	17.6639	18.7245	UP
contig68750	28.495	92.3225	58.7074	78.7849	UP
contig688	31.7281	63.4802	71.4336	60.6856	UP	AT3G18000	S-adenosyl-L-methionine-dependent methyltransferases superfamily protein
contig6883	13.0327	34.8299	17.2604	14.0402	UP	AT5G23370	GRAM domain-containing protein / ABA-responsive protein-related
contig69143	33.647	62.3466	83.2228	52.7483	UP	AT3G15630	unknown protein; FUNCTIONS IN: molecular_function unknown; INVOLVED IN: biological_process unknown; LOCATED IN: chloroplast; EXPRESSED IN: 24 plant structures; EXPRESSED DURING: 15 growth stages; BEST Arabidopsis thaliana protein match is: unknown protein (TAIR:AT1G52720.1); Has 61 Blast hits to 61 proteins in 13 species: Archae - 0; Bacteria - 0; Metazoa - 0; Fungi - 0; Plants - 61; Viruses - 0;…
contig69499	11.3584	25.6319	33.7029	9.2651	UP	AT5G39110	RmlC-like cupins superfamily protein
contig69516	13.9286	24.7423	21.8785	13.5357	UP
contig69540	113.795	328.897	127.761	75.9348	UP
contig69648	20.1541	35.0106	22.2253	18.0907	UP	AT5G66390	Peroxidase superfamily protein
contig6978	11.4977	26.3526	16.541	7.68182	UP	AT4G16260	Glycosyl hydrolase superfamily protein
contig6980	11.6055	42.4612	31.1264	12.9781	UP	AT2G18700	trehalose phosphatase/synthase 11
contig70102	25.7638	56.622	89.3196	51.8986	UP
contig70275	9.14964	20.364	30.2205	8.57627	UP
contig705	63.1458	110.297	158.669	56.1198	UP	AT3G09840	cell division cycle 48
contig7061	17.4958	42.6857	33.4895	14.5138	UP	AT2G38750	annexin 4
contig7096	13.0735	24.5815	13.2587	14.0496	UP	AT5G05340	Peroxidase superfamily protein
contig71087	9.35104	45.4568	45.7007	5.31792	UP
contig71405	14.2349	37.8449	15.4318	6.26124	UP
contig717	14.4759	24.5994	20.5373	10.4742	UP	AT1G22930	T-complex protein 11
contig7200	1453.01	2522.88	5079.59	689.056	UP	AT1G13440	glyceraldehyde-3-phosphate dehydrogenase C2
contig72119	17.2568	30.3171	16.384	12.6791	UP	AT2G37040	PHE ammonia lyase 1
contig7276	13.7623	23.4291	26.0033	12.5691	UP	AT2G47060	Protein kinase superfamily protein
contig7283	88.9295	177.263	71.9651	40.5669	UP	AT1G02260	Divalent ion symporter
contig729	91.4368	200.771	153.556	165.44	UP	AT4G11600	glutathione peroxidase 6
contig732	13.0239	27.7287	35.9145	15.3905	UP
contig7364	15.0815	30.0623	28.4636	9.39579	UP	AT1G62660	Glycosyl hydrolases family 32 protein
contig7385	15.0961	35.7405	42.1186	11.2321	UP	AT4G37530	Peroxidase superfamily protein
contig7416	9.95143	23.2276	18.2659	5.64837	UP	AT3G30390	Transmembrane amino acid transporter family protein
contig7457	38.419	65.5417	96.8056	32.9905	UP	AT5G07475	Cupredoxin superfamily protein
contig74659	23.2795	51.3019	34.1217	16.6917	UP	AT4G14630	germin-like protein 9
contig75403	17.9006	38.1505	34.5386	19.759	UP
contig7602	71.1953	138.495	183.93	54.9623	UP	AT4G30190	H(+)-ATPase 2
contig7619	20.8338	41.0437	30.7658	22.72	UP	AT1G20190	expansin 11
contig7620	19.9427	34.4175	24.266	22.1272	UP	AT1G20190	expansin 11
contig763	17.1152	29.5917	38.5525	19.2057	UP	AT5G54160	O-methyltransferase 1
contig7662	14.3551	41.4388	26.3095	18.4252	UP	AT1G15960	NRAMP metal ion transporter 6
contig76826	46.3066	139.598	212.355	39.5819	UP	AT3G49340	Cysteine proteinases superfamily protein
contig76961	14.2773	25.8241	17.0807	15.9278	UP	AT1G64160	Disease resistance-responsive (dirigent-like protein) family protein
contig7706	17.1209	34.6326	31.6633	15.477	UP	AT2G02040	peptide transporter 2
contig7734	85.9672	147.702	111.989	35.8347	UP
contig78248	14.4482	42.0792	17.2104	14.6947	UP	AT1G06330	Heavy metal transport/detoxification superfamily protein
contig7830	11.8074	35.1972	18.5828	17.1224	UP	AT4G39640	gamma-glutamyl transpeptidase 1
contig7848	90.4879	181.799	259.657	58.5751	UP	AT5G19140	Aluminium induced protein with YGL and LRDR motifs
contig78657	9.76407	20.9204	14.0462	9.69914	UP	AT4G11070	WRKY family transcription factor
contig78783	18.1555	34.8945	63.7962	42.6474	UP
contig79092	38.2407	85.4061	24.0463	13.6756	UP
contig7910	14.6682	27.1626	24.8123	14.9214	UP	AT4G20070	allantoate amidohydrolase
contig7916	10.5349	21.5137	37.4545	20.7163	UP	AT5G43580	Serine protease inhibitor potato inhibitor I-type family protein
contig79288	11.4711	27.1244	18.2506	10.8587	UP	AT5G67420	LOB domain-containing protein 37
contig7971	22.7064	48.0282	43.361	18.1068	UP	AT1G06620	2-oxoglutarate (2OG) and Fe(II)-dependent oxygenase superfamily protein
contig7980	19.9109	34.9646	25.7825	19.6351	UP	AT3G01850	Aldolase-type TIM barrel family protein
contig80	407.906	759.158	798.124	208.253	UP	AT3G43190	sucrose synthase 4
contig80072	44.0539	134.214	43.9081	28.5838	UP	AT5G37810	NOD26-like intrinsic protein 4;1
contig80693	11.3267	32.3755	9.71488	16.9943	UP	AT1G49820	S-methyl-5-thioribose kinase
contig8072	100.386	191.266	202.508	88.1766	UP	AT3G02520	general regulatory factor 7
contig8086	13.9289	48.0737	23.8815	15.8577	UP	AT1G55120	beta-fructofuranosidase 5
contig81053	10.9445	20.9873	14.6111	8.29906	UP	AT1G06650	2-oxoglutarate (2OG) and Fe(II)-dependent oxygenase superfamily protein
contig8113	68.948	217.006	183.609	104.945	UP	AT4G27450	Aluminium induced protein with YGL and LRDR motifs
contig8124	21.2226	42.649	34.6436	19.3008	UP	AT1G56130	Leucine-rich repeat transmembrane protein kinase
contig81432	7.14741	20.5567	10.0515	7.5896	UP
contig8206	74.0937	168.853	197.127	78.6699	UP	AT4G23850	AMP-dependent synthetase and ligase family protein
contig82100	12.668	47.4489	17.3436	19.0707	UP	AT2G30840	2-oxoglutarate (2OG) and Fe(II)-dependent oxygenase superfamily protein
contig8426	26.6601	53.9998	84.9525	26.4028	UP	AT2G26230	uricase / urate oxidase / nodulin 35 putative
contig85452	58.3046	144.107	54.1875	47.9589	UP
contig85847	7.70817	21.2429	8.09688	8.29442	UP
contig85850	18.0999	37.0524	27.79	18.2558	UP	AT1G15960	NRAMP metal ion transporter 6
contig8624	36.4812	76.3197	39.3282	54.8099	UP	AT5G12040	Nitrilase/cyanide hydratase and apolipoprotein N-acyltransferase family protein
contig8625	18.3282	41.5144	21.5608	25.2412	UP	AT5G12040	Nitrilase/cyanide hydratase and apolipoprotein N-acyltransferase family protein
contig8643	19.3807	45.4445	29.7779	31.7437	UP	AT4G39640	gamma-glutamyl transpeptidase 1
contig8734	14.7629	49.0694	39.8595	43.3561	UP	AT1G10970	zinc transporter 4 precursor
contig8763	11.7396	21.473	24.3069	12.1468	UP	AT3G01860	unknown protein; FUNCTIONS IN: molecular_function unknown; INVOLVED IN: response to cadmium ion; LOCATED IN: chloroplast; EXPRESSED IN: 24 plant structures; EXPRESSED DURING: 13 growth stages; BEST Arabidopsis thaliana protein match is: unknown protein (TAIR:AT3G27210.1); Has 66 Blast hits to 66 proteins in 13 species: Archae - 0; Bacteria - 0; Metazoa - 5; Fungi - 0; Plants - 61; Viruses - 0; Ot…
contig8807	35.8951	84.6734	62.851	56.2824	UP	AT1G23870	trehalose-phosphatase/synthase 9
contig8849	15.695	29.9658	33.008	13.822	UP	AT2G25490	EIN3-binding F box protein 1
contig8897	54.8007	225.148	162.681	143.568	UP
contig8916	19.3552	34.0647	25.5413	14.3732	UP	AT3G03990	alpha/beta-Hydrolases superfamily protein
contig8960	10.4955	30.3269	26.4578	12.2898	UP	AT2G18700	trehalose phosphatase/synthase 11
contig9010	19.0608	32.1542	43.6621	12.47	UP	AT3G14660	cytochrome P450 family 72 subfamily A polypeptide 13
contig9041	32.9362	93.9689	149.026	96.8758	UP	AT4G27450	Aluminium induced protein with YGL and LRDR motifs
contig9151	9.76768	70.2483	30.6221	22.0199	UP	AT5G53550	YELLOW STRIPE like 3
contig9185	169.06	580.506	295.566	282.099	UP	AT3G17390	S-adenosylmethionine synthetase family protein
contig919	498.142	900.858	998.677	252.059	UP	AT3G43190	sucrose synthase 4
contig920	273.009	612.619	702.463	265.44	UP	AT3G10340	phenylalanine ammonia-lyase 4
contig92293	20.9242	55.3951	226.251	54.6897	UP	AT5G25940	early nodulin-related
contig930	214.541	1430.91	325.446	527.661	UP	AT4G14716	acireductone dioxygenase 1
contig938	18.6282	33.1895	37.428	27.6253	UP	AT1G75220	Major facilitator superfamily protein
contig9381	15.3098	27.4188	43.7751	13.7133	UP	AT4G31860	Protein phosphatase 2C family protein
contig95081	19.7641	50.3581	267.369	78.2706	UP
contig95207	16.216	27.7808	11.3253	9.20863	UP
contig9558	10.1977	20.6392	24.7647	6.45852	UP	AT5G50760	SAUR-like auxin-responsive protein family
contig95861	11.9386	30.0498	44.8642	6.83768	UP	AT1G51800	Leucine-rich repeat protein kinase family protein
contig964	11.1117	20.0014	16.1881	4.55962	UP	AT4G23190	cysteine-rich RLK (RECEPTOR-like protein kinase) 11
contig9842	116.612	245.268	166.745	115.636	UP	AT4G01850	S-adenosylmethionine synthetase 2
contig9843	23.5635	60.226	114.141	22.5419	UP	AT4G33950	Protein kinase superfamily protein
contig9903	12.1218	23.5992	30.7067	11.4685	UP	AT1G21450	SCARECROW-like 1
contig9969	12.1881	27.9335	24.6437	8.99483	UP	AT3G14770	Nodulin MtN3 family protein
