# Supplementary material for: Molecular Responses to Cadmium Exposure in Two Contrasting Durum Wheat Genotypes
Source: Int J Mol Sci. 2021 Jul 8;22(14):7343. doi: 10.3390/ijms22147343 (PMC8306872; doi:10.3390/ijms22147343)
Supplement: Supplementary file 1 [file ijms-22-07343-s001.zip › Table S5_ Down-regulated only in L-Cd treated plants.xlsx]

## Sheet: Foglio1
Contig_id	L_root_CTRL	L_root_CD	H_root_CTRL	H_root_CD	L Root CTRL Vs CD	AGI code	Annotation
contig17829	47.5737	17.3991	33.0026	49.9476	DOWN
contig18129	51.0982	16.3091	34.4401	51.5476	DOWN
contig18547	99.7087	41.1756	95.8401	73.013	DOWN
contig20168	21.3866	8.6169	15.69	23.6887	DOWN	AT1G11240.1	CONTAINS InterPro DOMAIN/s: Nucleolar protein 12 (InterPro:IPR019186); Has 2484 Blast hits to 1934 proteins in 262 species: Archae - 0; Bacteria - 90; Metazoa - 921; Fungi - 378; Plants - 144; Viruses - 18; Other Eukaryotes - 933 (source: NCBI BLink).
contig23841	25.6605	9.80647	14.9327	14.4832	DOWN	AT1G71350.1	eukaryotic translation initiation factor SUI1 family protein
contig24340	71.4921	13.3049	30.151	15.8376	DOWN	AT5G51440.1	HSP20-like chaperones superfamily protein
contig26177	27.1559	8.79366	16.148	11.4983	DOWN	AT1G06520.1	glycerol-3-phosphate acyltransferase 1
contig26178	21.6142	7.92829	12.3957	7.61444	DOWN	AT4G01950.1	glycerol-3-phosphate acyltransferase 3
contig26337	24.2651	7.96799	11.5387	17.5636	DOWN	AT5G16260.1	RNA binding (RRM/RBD/RNP motifs) family protein
contig28040	30.0492	12.1724	27.7062	41.5298	DOWN
contig28250	28.5863	10.3783	14.4943	20.3863	DOWN
contig32324	28.7216	10.239	22.7726	25.2059	DOWN
contig32372	25.096	10.5213	13.7482	17.4216	DOWN
contig34696	35.7635	13.7075	22.2816	26.3925	DOWN	AT5G23570.1	XS domain-containing protein / XS zinc finger domain-containing protein-related
contig35662	20.6412	3.40245	37.5024	16.443	DOWN
contig4177	46.188	17.3397	44.0699	36.9014	DOWN	AT4G16660.1	heat shock protein 70 (Hsp 70) family protein
contig42454	27.5316	10.7734	14.0957	17.6026	DOWN
contig4497	22.6378	8.95937	14.8942	16.1566	DOWN	AT5G18540.1	unknown protein; Has 2026 Blast hits to 792 proteins in 129 species: Archae - 2; Bacteria - 12; Metazoa - 1126; Fungi - 267; Plants - 292; Viruses - 0; Other Eukaryotes - 327 (source: NCBI BLink).
contig46263	114.052	45.8454	177.805	191.641	DOWN	AT1G62660.1	Glycosyl hydrolases family 32 protein
contig48572	85.1864	31.6728	64.5256	64.0835	DOWN	AT3G07770.1	HEAT SHOCK PROTEIN 89.1
contig48769	28.062	10.1813	21.5273	15.7733	DOWN	AT1G22160.1	Protein of unknown function (DUF581)
contig48874	23.7112	7.59893	9.95356	15.5387	DOWN
contig49755	31.0781	7.82731	7.61981	3.06929	DOWN
contig49775	52.7813	20.7292	56.8895	53.9735	DOWN
contig50061	22.9287	9.28525	23.0722	27.455	DOWN	AT2G29500.1	HSP20-like chaperones superfamily protein
contig51073	33.9189	13.3166	20.2868	29.5354	DOWN	AT5G16250.1	unknown protein; BEST Arabidopsis thaliana protein match is: unknown protein (TAIR:AT3G02640.1); Has 1807 Blast hits to 1807 proteins in 277 species: Archae - 0; Bacteria - 0; Metazoa - 736; Fungi - 347; Plants - 385; Viruses - 0; Other Eukaryotes - 339 (source: NCBI BLink).
contig51164	26.1311	10.621	29.6698	13.8615	DOWN	AT1G30070.2	SGS domain-containing protein
contig53524	21.9558	8.86791	10.4265	11.3886	DOWN
contig54388	23.2184	6.69126	11.6284	5.05303	DOWN
contig58751	67.1175	22.3202	41.6814	24.2368	DOWN	AT3G04500.1	RNA-binding (RRM/RBD/RNP motifs) family protein
contig63100	30.7962	12.0817	16.5692	13.8786	DOWN	AT1G01610.1	glycerol-3-phosphate acyltransferase 4
contig64283	51.4498	16.7167	33.9056	22.0147	DOWN	AT4G12400.2	stress-inducible protein putative
contig66298	22.6459	2.80612	19.1663	8.66036	DOWN
contig7249	58.5619	20.8506	53.5545	47.0568	DOWN	AT4G16660.1	heat shock protein 70 (Hsp 70) family protein
contig72772	23.2313	8.22161	8.09853	15.5676	DOWN
contig7507	32.3812	13.0762	19.9511	22.4051	DOWN	AT2G37990.1	ribosome biogenesis regulatory protein (RRS1) family protein
contig7995	20.2745	8.30889	14.0081	16.5308	DOWN
contig8199	39.5128	16.2701	35.7457	56.914	DOWN	AT1G31970.1	DEA(D/H)-box RNA helicase family protein
contig83706	23.2129	8.78132	31.3769	39.0545	DOWN
contig88886	21.7019	8.37081	11.0345	6.0291	DOWN	AT3G55040.1	glutathione transferase lambda 2
contig9231	21.9657	7.60687	13.7531	7.4855	DOWN	AT4G24050.1	NAD(P)-binding Rossmann-fold superfamily protein
contig98069	23.3418	9.75568	18.5546	26.3218	DOWN
contig9881	22.2844	9.14333	15.4669	22.2464	DOWN	AT5G57120.1	FUNCTIONS IN: molecular_function unknown; INVOLVED IN: biological_process unknown; LOCATED IN: nucleolus; EXPRESSED IN: 21 plant structures; EXPRESSED DURING: 13 growth stages; CONTAINS InterPro DOMAIN/s: LisH dimerisation motif (InterPro:IPR006594) SRP40 C-terminal (InterPro:IPR007718); Has 101969 Blast hits to 55488 proteins in 2506 species: Archae - 424; Bacteria - 13843; Metazoa - 37674; Fung…
