# Supplementary material for: Molecular Responses to Cadmium Exposure in Two Contrasting Durum Wheat Genotypes
Source: Int J Mol Sci. 2021 Jul 8;22(14):7343. doi: 10.3390/ijms22147343 (PMC8306872; doi:10.3390/ijms22147343)
Supplement: Supplementary file 1 [file ijms-22-07343-s001.zip › Table S6_ Up-regulated only in H-Cd treated plants.xlsx]

## Sheet: Foglio1
Contig_id	L_root_CTRL	L_root_CD	H_root_CTRL	H_root_CD	H Root CTRL Vs CD	AGI Code	Annotation
contig101059	16.8508	14.3039	13.1914	31.6179	UP
contig10258	23.4981	18.2983	19.2411	37.4758	UP	AT4G31470.1	CAP (Cysteine-rich secretory proteins Antigen 5 and Pathogenesis-related 1 protein) superfamily protein
contig10372	16.4296	15.5708	10.8598	34.6757	UP
contig104062	24.1376	24.017	16.4651	28.1891	UP
contig105162	39.2777	16.0897	8.78978	34.1845	UP
contig10717	204.655	188.715	144.183	317.089	UP	AT1G48750.1	Bifunctional inhibitor/lipid-transfer protein/seed storage 2S albumin superfamily protein
contig10718	62.7119	67.4903	41.8458	79.7971	UP	AT3G18280.1	Bifunctional inhibitor/lipid-transfer protein/seed storage 2S albumin superfamily protein
contig108274	0.827327	4.8522	1.27804	21.3165	UP	AT1G22550.1	Major facilitator superfamily protein
contig11093	16.3725	12.4444	12.1052	25.3544	UP
contig11228	5.18185	6.93693	7.10236	22.6039	UP	AT1G56430.1	nicotianamine synthase 4
contig11239	76.8466	66.4612	48.138	90.6577	UP	AT5G01240.1	like AUXIN RESISTANT 1
contig1158	81.5905	81.4714	56.1405	98.6385	UP	AT5G10770.1	Eukaryotic aspartyl protease family protein
contig11636	24.5759	20.4129	15.1136	31.4009	UP	AT1G65870.1	Disease resistance-responsive (dirigent-like protein) family protein
contig11639	15.6969	12.8096	13.7395	23.5792	UP
contig11651	41.2411	20.6816	22.263	42.8096	UP	AT5G56360.1	calmodulin-binding protein
contig11760	36.3618	26.2181	17.9345	49.9753	UP
contig11923	15.6469	11.4939	11.1456	20.275	UP	AT4G00980.1	zinc knuckle (CCHC-type) family protein
contig12111	32.1016	23.5331	19.0728	34.6684	UP	AT5G15090.1	voltage dependent anion channel 3
contig12156	24.4872	14.0847	14.9375	35.7725	UP	AT5G55660.1	DEK domain-containing chromatin associated protein
contig12194	16.049	12.2435	11.6068	23.1598	UP	AT5G10770.1	Eukaryotic aspartyl protease family protein
contig1220	40.1295	16.865	22.7358	39.148	UP
contig122427	12.7155	16.8987	17.2795	32.5039	UP
contig12368	13.1406	18.1124	14.6233	32.9858	UP
contig12382	31.9633	17.2515	22.396	47.9328	UP
contig12650	20.3333	21.5957	18.9266	35.7939	UP	AT3G08650.2	ZIP metal ion transporter family
contig126646	10.1087	11.6598	10.7111	22.3586	UP
contig12722	24.6581	13.211	12.6071	30.8325	UP
contig128726	52.5054	41.9363	36.1739	127.36	UP
contig12984	41.2604	31.3908	27.5623	48.0338	UP	AT1G15780.1	unknown protein; BEST Arabidopsis thaliana protein match is: unknown protein (TAIR:AT2G10440.1); Has 103701 Blast hits to 43153 proteins in 1828 species: Archae - 30; Bacteria - 7385; Metazoa - 38639; Fungi - 11531; Plants - 7727; Viruses - 307; Other Eukaryotes - 38082 (source: NCBI BLink).
contig132058	9.54899	5.38884	8.29613	27.1306	UP	AT1G76140.1	Prolyl oligopeptidase family protein
contig13306	18.4064	21.8012	17.1586	30.104	UP
contig13331	105.176	69.5099	92.3222	167.467	UP	AT5G57530.1	xyloglucan endotransglucosylase/hydrolase 12
contig135367	16.976	17.3028	13.084	24.2923	UP
contig13550	26.3925	13.0466	15.6843	31.7177	UP
contig13741	16.2573	8.46369	11.483	21.2433	UP	AT1G04160.1	myosin XI B
contig14236	13.3281	7.89619	7.93557	20.8135	UP	AT3G59690.1	IQ-domain 13
contig14237	28.5325	8.34158	10.1382	43.5085	UP
contig14827	22.0817	10.8162	14.0058	29.2035	UP	AT3G06400.3	chromatin-remodeling protein 11
contig14849	24.8656	12.7289	16.2062	32.6123	UP	AT5G57110.1	autoinhibited Ca2+ -ATPase isoform 8
contig14856	33.8939	20.276	24.902	43.1733	UP
contig150907	9.48297	10.8841	14.3556	35.2983	UP	AT1G76140.1	Prolyl oligopeptidase family protein
contig15100	29.6267	16.168	22.0613	41.4222	UP	AT3G18480.1	CCAAT-displacement protein alternatively spliced product
contig15124	37.4817	18.2585	20.7932	35.3334	UP	AT4G21710.1	DNA-directed RNA polymerase family protein
contig15203	33.0299	14.3584	18.7687	33.3069	UP
contig155	0.437587	101.46	9.84575	41.9866	UP	AT5G13740.1	zinc induced facilitator 1
contig15703	43.035	26.5337	26.8159	46.7436	UP
contig157600	19.1981	21.8306	14.3545	26.4591	UP	AT4G30320.1	CAP (Cysteine-rich secretory proteins Antigen 5 and Pathogenesis-related 1 protein) superfamily protein
contig15770	30.7005	12.8842	21.7072	37.4205	UP
contig15804	37.8088	19.1395	20.6819	39.5134	UP
contig15869	19.6389	8.67636	13.61	25.6455	UP	AT1G65540.1	LETM1-like protein
contig15935	16.7499	10.5326	12.5985	22.353	UP	AT3G57300.2	INO80 ortholog
contig16030	193.828	107.907	88.9992	266.452	UP
contig16165	109.338	51.702	46.3697	81.2924	UP
contig16412	57.8674	38.8507	46.8042	81.5137	UP
contig16419	22.7101	11.853	8.5344	26.8934	UP
contig16443	23.5387	11.1226	12.7891	30.8375	UP	AT3G18480.1	CCAAT-displacement protein alternatively spliced product
contig16553	259.503	137.967	100.938	197.91	UP
contig165861	16.6476	16.9235	10.3892	25.7814	UP	AT1G48100.1	Pectin lyase-like superfamily protein
contig16612	20.4507	11.525	12.0174	21.1922	UP	AT5G06970.1	Protein of unknown function (DUF810)
contig167265	6.2745	5.32448	7.19417	28.9781	UP	AT5G42510.1	Disease resistance-responsive (dirigent-like protein) family protein
contig167928	15.0923	12.2639	8.94388	21.7114	UP	AT4G27270.1	Quinone reductase family protein
contig168050	6.13388	7.93516	11.8893	20.5029	UP
contig16866	35.3976	22.6384	25.1769	46.4675	UP	AT3G06400.3	chromatin-remodeling protein 11
contig168936	29.7912	38.4513	16.1299	32.4047	UP
contig17081	24.4895	20.0423	17.4867	33.221	UP	AT1G75500.1	Walls Are Thin 1
contig17100	35.3506	16.8196	19.566	33.8964	UP	AT2G41640.1	Glycosyltransferase family 61 protein
contig17254	43.0147	23.9254	23.146	41.7092	UP	AT5G04560.2	HhH-GPD base excision DNA repair family protein
contig17286	46.4461	25.9411	24.1455	42.4941	UP	AT3G21180.1	autoinhibited Ca(2+)-ATPase 9
contig17300	34.192	21.8429	27.3726	63.209	UP
contig17314	27.5778	13.971	15.5786	35.9349	UP	AT5G55660.1	DEK domain-containing chromatin associated protein
contig17678	74.8923	42.3059	39.133	83.5438	UP
contig18597	20.7683	12.0962	11.368	23.3224	UP	AT3G54670.3	Structural maintenance of chromosomes (SMC) family protein
contig18617	86.5971	97.8597	49.0847	109.846	UP
contig18679	35.7217	22.5921	23.3222	46.5096	UP	AT1G14690.1	microtubule-associated protein 65-7
contig18800	57.9067	31.0895	41.7747	88.532	UP
contig18823	58.7095	59.3264	50.9935	92.1036	UP	AT4G33420.1	Peroxidase superfamily protein
contig18874	18.2358	10.419	14.8975	25.3753	UP
contig19022	21.0047	7.36845	12.1996	22.4216	UP
contig19031	34.7246	15.0413	24.9613	43.7306	UP
contig19404	36.3571	9.60283	12.9373	22.276	UP
contig19515	27.8144	14.8391	17.4864	30.1986	UP
contig19546	19.0623	12.9877	10.5869	21.2989	UP	AT1G75820.1	Leucine-rich receptor-like protein kinase family protein
contig19559	24.9083	21.3208	21.0352	38.5879	UP
contig19624	23.227	10.4484	14.2123	28.0933	UP
contig19900	7.30334	0.773375	11.2722	26.6642	UP
contig20099	22.4663	14.4357	11.835	23.4923	UP
contig20206	11.2635	9.01155	9.2437	21.5919	UP
contig20432	21.1875	11.4125	14.0551	28.3313	UP	AT2G47500.1	P-loop nucleoside triphosphate hydrolases superfamily protein with CH (Calponin Homology) domain
contig2047	21.3557	11.0153	13.7515	23.9088	UP
contig2048	16.9606	7.03279	12.1248	25.9875	UP	AT1G65540.1	LETM1-like protein
contig20537	16.266	7.30816	13.2453	23.0635	UP	AT4G39050.1	Kinesin motor family protein
contig20698	30.9789	15.9217	20.619	35.5903	UP	AT1G71220.2	UDP-glucose:glycoprotein glucosyltransferases;transferases transferring hexosyl groups;transferases transferring glycosyl groups
contig21166	19.931	10.3115	11.9714	20.995	UP	AT1G58230.1	binding
contig21167	16.1635	6.65613	8.31788	21.6219	UP	AT3G47460.1	Structural maintenance of chromosomes (SMC) family protein
contig21168	21.7035	8.65803	11.214	23.3305	UP	AT3G47460.1	Structural maintenance of chromosomes (SMC) family protein
contig21317	44.0279	16.7348	17.938	37.491	UP
contig21514	46.6287	21.7361	22.9292	39.0525	UP
contig21572	35.2582	13.4069	24.7104	47.3936	UP	AT3G12020.2	P-loop containing nucleoside triphosphate hydrolases superfamily protein
contig21573	36.6833	14.4406	25.9865	54.5084	UP	AT3G12020.2	P-loop containing nucleoside triphosphate hydrolases superfamily protein
contig21612	35.1419	17.296	12.1212	36.5547	UP
contig21737	28.8784	22.33	19.5717	43.467	UP
contig21910	26.0578	16.2463	18.409	32.602	UP	AT3G19340.1	Protein of unknown function (DUF3754)
contig21972	20.0757	12.1548	18.3012	35.9806	UP	AT5G37478.1	TPX2 (targeting protein for Xklp2) protein family
contig22368	20.8874	13.8877	8.83489	21.3008	UP
contig22454	25.3261	14.0351	17.0463	31.2756	UP	AT5G06120.1	ARM repeat superfamily protein
contig226	119.365	136.2	64.7804	128.842	UP	AT4G29260.1	HAD superfamily subfamily IIIB acid phosphatase
contig227	35.4096	35.4366	21.6229	41.9314	UP	AT4G29260.1	HAD superfamily subfamily IIIB acid phosphatase
contig22746	102.632	58.7375	46.5233	96.6829	UP
contig22764	50.8459	23.7956	33.9396	60.6857	UP	AT5G56360.1	calmodulin-binding protein
contig22817	24.6359	13.5297	15.0685	27.2718	UP	AT4G01210.1	glycosyl transferase family 1 protein
contig2296	18.8128	11.3801	10.5256	20.0201	UP
contig22979	3.75762	1.54435	6.88875	27.4207	UP
contig23064	25.1789	11.7664	15.8429	28.667	UP	AT2G25110.1	stromal cell-derived factor 2-like protein precursor
contig23504	24.3645	12.0336	15.4534	27.2267	UP	AT5G20840.1	Phosphoinositide phosphatase family protein
contig2371	25.2363	16.2733	18.0717	32.3825	UP	AT3G07160.1	glucan synthase-like 10
contig2372	26.6666	14.8204	17.4511	31.2575	UP	AT3G07160.1	glucan synthase-like 10
contig2376	40.4637	20.3503	11.4212	37.4102	UP
contig23912	33.8635	31.4976	30.5569	62.5283	UP	AT2G43610.1	Chitinase family protein
contig23945	41.8864	38.4605	23.2907	46.6868	UP	AT2G36100.1	Uncharacterised protein family (UPF0497)
contig23952	25.3522	10.3579	12.1249	29.9633	UP
contig24055	39.1694	20.9586	16.3019	36.5676	UP
contig24186	57.3716	45.712	25.2406	62.608	UP
contig24187	67.2259	50.9051	23.6695	63.6642	UP	AT4G00880.1	SAUR-like auxin-responsive protein family
contig2438	4.43141	5.62259	10.2508	43.1522	UP
contig24521	12.9014	13.7072	10.8037	20.8287	UP	AT3G15630.1	unknown protein; FUNCTIONS IN: molecular_function unknown; INVOLVED IN: biological_process unknown; LOCATED IN: chloroplast; EXPRESSED IN: 24 plant structures; EXPRESSED DURING: 15 growth stages; BEST Arabidopsis thaliana protein match is: unknown protein (TAIR:AT1G52720.1); Has 61 Blast hits to 61 proteins in 13 species: Archae - 0; Bacteria - 0; Metazoa - 0; Fungi - 0; Plants - 61; Viruses - 0;…
contig24550	28.1329	23.2952	21.3427	42.6056	UP	AT5G18280.2	apyrase 2
contig25001	3.97063	5.93555	7.57454	33.5119	UP	AT3G47640.1	basic helix-loop-helix (bHLH) DNA-binding superfamily protein
contig25117	20.989	19.155	10.3959	20.2522	UP
contig25244	0.212605	0.0947047	22.5784	41.6382	UP	AT3G02280.1	Flavodoxin family protein
contig25386	21.333	17.6144	12.779	21.8975	UP
contig25556	14.1712	13.7759	12.3443	22.1382	UP	AT3G24315.1	Sec20 family protein
contig25574	44.4694	23.4421	26.9947	47.4357	UP
contig25968	62.8547	33.0303	29.7735	60.411	UP	AT3G57785.1	unknown protein; BEST Arabidopsis thaliana protein match is: unknown protein (TAIR:AT2G42310.1); Has 121 Blast hits to 121 proteins in 51 species: Archae - 0; Bacteria - 0; Metazoa - 4; Fungi - 48; Plants - 67; Viruses - 0; Other Eukaryotes - 2 (source: NCBI BLink).
contig26069	75.7442	29.2791	35.1691	65.6589	UP
contig26556	60.2532	64.9191	38.1965	65.8132	UP
contig26767	21.3026	13.7747	17.8587	30.6103	UP	AT5G06120.1	ARM repeat superfamily protein
contig26966	22.2105	22.869	18.3452	31.3786	UP
contig27241	24.7011	10.74	12.0311	24.502	UP	AT4G39300.1	unknown protein; FUNCTIONS IN: molecular_function unknown; INVOLVED IN: biological_process unknown; LOCATED IN: chloroplast; EXPRESSED IN: 22 plant structures; EXPRESSED DURING: 13 growth stages; Has 30201 Blast hits to 17322 proteins in 780 species: Archae - 12; Bacteria - 1396; Metazoa - 17338; Fungi - 3422; Plants - 5037; Viruses - 0; Other Eukaryotes - 2996 (source: NCBI BLink).
contig27288	18.7256	8.59779	12.2099	26.8667	UP
contig27562	30.7939	24.055	17.3981	29.9642	UP
contig27582	22.801	23.5665	15.6579	27.1768	UP
contig27691	17.3924	13.8068	12.3026	24.9797	UP	AT2G28790.1	Pathogenesis-related thaumatin superfamily protein
contig28084	148.467	140.852	82.5436	141.161	UP	AT4G31550.1	WRKY DNA-binding protein 11
contig28505	21.1341	12.0894	12.7114	24.7596	UP
contig28525	110.029	184.924	110.462	218.984	UP
contig28743	3.7596	4.08658	6.08675	41.121	UP	AT5G53450.1	OBP3-responsive gene 1
contig28750	56.8357	26.0261	25.2714	54.7912	UP
contig2879	9.60631	14.3888	6.88947	31.9861	UP
contig28809	18.6429	9.55947	12.8311	24.6187	UP
contig29039	15.8511	10.154	12.5428	25.6754	UP	AT3G61480.1	Quinoprotein amine dehydrogenase beta chain-like; RIC1-like guanyl-nucleotide exchange factor
contig29319	26.1038	12.2326	16.3353	31.8347	UP	AT1G79830.4	golgin candidate 5
contig29372	18.0661	9.9782	15.2904	26.6249	UP
contig29386	30.7141	20.091	17.648	30.2559	UP	AT1G20330.1	sterol methyltransferase 2
contig29446	64.9489	38.2395	27.2779	73.9998	UP
contig29495	26.1485	11.6928	14.7346	33.0219	UP	AT5G18620.2	chromatin remodeling factor17
contig29520	14.4443	19.977	13.6866	26.2646	UP	AT4G20860.1	FAD-binding Berberine family protein
contig29575	27.6567	13.5495	13.6356	29.3048	UP	AT2G21790.1	ribonucleotide reductase 1
contig29722	43.3127	41.5607	27.9741	67.2034	UP	AT4G12780.1	Chaperone DnaJ-domain superfamily protein
contig29875	16.455	9.30993	11.9143	22.5919	UP	AT1G31420.1	Leucine-rich repeat protein kinase family protein
contig29901	71.4656	32.0764	32.7726	65.8625	UP	AT4G15800.1	ralf-like 33
contig30001	126.317	43.9929	58.0815	100.225	UP
contig30244	25.4785	23.418	27.1717	47.4515	UP	AT5G59870.1	histone H2A 6
contig30343	3.78091	2.80091	11.639	20.2707	UP
contig30653	44.173	26.9982	23.3966	40.0033	UP
contig30676	41.0966	20.306	24.1427	42.509	UP
contig30750	36.3414	32.742	27.2494	47.1225	UP	AT2G43580.1	Chitinase family protein
contig30890	27.4815	15.0131	13.9215	31.439	UP
contig31081	80.4499	55.2222	27.7991	79.6451	UP
contig31191	16.6923	20.3491	12.1968	22.8789	UP	AT5G20650.1	copper transporter 5
contig31192	16.8877	22.4497	12.5131	26.7131	UP	AT5G20650.1	copper transporter 5
contig31198	28.2877	15.5278	20.0171	35.9143	UP
contig31274	25.5962	24.6897	26.4049	44.7114	UP
contig31529	31.8492	15.0823	22.7931	48.0075	UP	AT1G06490.1	glucan synthase-like 7
contig31567	63.7476	40.0616	46.613	82.981	UP	AT2G34680.1	Outer arm dynein light chain 1 protein
contig31622	23.6338	11.8505	11.1961	23.9349	UP	AT1G45170.1	unknown protein; BEST Arabidopsis thaliana protein match is: unknown protein (TAIR:AT5G42960.1); Has 62 Blast hits to 62 proteins in 18 species: Archae - 0; Bacteria - 0; Metazoa - 0; Fungi - 0; Plants - 62; Viruses - 0; Other Eukaryotes - 0 (source: NCBI BLink).
contig31891	22.6206	14.8577	14.8089	28.4011	UP	AT5G67270.1	end binding protein 1C
contig3190	77.6395	32.3322	24.3716	63.4119	UP	AT5G60390.1	GTP binding Elongation factor Tu family protein
contig31942	65.4655	20.4067	25.7125	51.6681	UP
contig32075	47.3007	33.1651	42.2043	75.2528	UP	AT2G34680.1	Outer arm dynein light chain 1 protein
contig32120	24.8156	16.3272	17.2813	32.4804	UP	AT5G18410.1	transcription activators
contig32213	28.2826	12.3689	12.4726	28.6088	UP
contig3222	66.7542	32.6281	27.7337	74.993	UP
contig32239	0.169473	18.3978	0.601774	27.6282	UP	AT5G58330.1	lactate/malate dehydrogenase family protein
contig32332	18.405	11.1141	13.632	23.5073	UP
contig32351	22.1092	23.0562	20.4275	34.5619	UP
contig32560	39.1223	13.5849	10.776	23.935	UP
contig32778	18.4234	8.22504	8.30105	20.7086	UP
contig33057	21.5101	26.9691	18.3355	40.1436	UP
contig33123	28.0883	14.3734	12.7469	24.2434	UP
contig332	21.948	9.75313	14.1011	25.0706	UP
contig337	20.0492	13.1017	12.6756	24.3887	UP	AT2G27170.1	Structural maintenance of chromosomes (SMC) family protein
contig33720	11.5832	3.19767	4.00198	20.9059	UP
contig33972	18.5371	7.64354	8.63822	23.8241	UP	AT1G04160.1	myosin XI B
contig34108	25.3866	13.6204	14.4277	29.7076	UP	AT1G15660.1	centromere protein C
contig34205	13.6674	10.5443	12.5996	27.7207	UP	AT3G54110.1	plant uncoupling mitochondrial protein 1
contig34275	26.6571	11.7797	10.4072	29.9604	UP
contig34384	20.6134	16.8283	12.8943	25.8928	UP
contig34475	19.2623	16.0813	12.3563	21.0615	UP
contig34670	26.6975	28.6309	22.5486	39.8229	UP	AT2G21100.1	Disease resistance-responsive (dirigent-like protein) family protein
contig34878	21.9188	13.8647	9.63388	23.075	UP	AT5G56040.2	Leucine-rich receptor-like protein kinase family protein
contig34892	40.0477	50.8388	33.0176	59.8869	UP	AT3G19430.1	late embryogenesis abundant protein-related / LEA protein-related
contig34897	10.7729	8.48339	10.0053	20.2198	UP	AT2G32300.1	uclacyanin 1
contig35000	47.0383	27.9778	35.1802	67.8933	UP	AT3G26670.1	Protein of unknown function (DUF803)
contig35092	19.0334	16.3631	15.0775	31.7491	UP	AT3G52470.1	Late embryogenesis abundant (LEA) hydroxyproline-rich glycoprotein family
contig35133	23.7407	11.792	12.8639	26.4295	UP
contig35399	14.716	12.642	10.8646	21.2245	UP	AT5G60690.1	Homeobox-leucine zipper family protein / lipid-binding START domain-containing protein
contig35554	26.9896	13.6667	15.0015	26.9857	UP
contig35607	9.868	10.1833	8.58219	21.0594	UP
contig35772	25.7811	16.8009	14.2769	27.3737	UP
contig35775	40.0026	31.0488	27.5724	63.4597	UP
contig35863	22.9793	14.6295	17.7245	46.3204	UP	AT5G13750.1	zinc induced facilitator-like 1
contig36167	31.4514	11.7198	9.41122	37.9352	UP
contig36246	34.1381	20.0806	16.5845	31.727	UP
contig36506	6.56952	7.59086	9.58012	39.1373	UP
contig36787	14.3871	9.44863	5.54855	31.8056	UP
contig36841	17.3983	10.1806	7.55507	23.0344	UP
contig36993	29.7672	18.3897	16.4127	39.1584	UP	AT1G17580.1	myosin 1
contig37102	15.7428	18.7953	10.3895	27.0715	UP	AT3G18290.1	zinc finger protein-related
contig37186	203.119	179.631	140.895	245.019	UP
contig37348	18.3104	9.24731	10.5967	20.2476	UP
contig37401	13.4908	6.51034	15.4968	27.8616	UP
contig37540	16.5564	12.8608	13.0558	22.5199	UP	AT2G18980.1	Peroxidase superfamily protein
contig3787	353.305	181.743	118.222	258.171	UP
contig38025	50.3094	33.694	38.1414	81.5525	UP
contig38091	21.3649	16.2788	13.7167	24.8982	UP	AT1G73590.1	Auxin efflux carrier family protein
contig38162	37.3932	33.3854	27.2893	50.3575	UP	AT1G72230.1	Cupredoxin superfamily protein
contig38403	33.9799	19.0453	15.7975	29.4711	UP	AT1G19660.1	Wound-responsive family protein
contig38404	17.7124	19.8068	10.2191	46.2271	UP	AT5G05250.1	unknown protein; BEST Arabidopsis thaliana protein match is: unknown protein (TAIR:AT3G56360.1); Has 30201 Blast hits to 17322 proteins in 780 species: Archae - 12; Bacteria - 1396; Metazoa - 17338; Fungi - 3422; Plants - 5037; Viruses - 0; Other Eukaryotes - 2996 (source: NCBI BLink).
contig38491	22.6067	15.2454	15.9149	34.954	UP
contig38608	21.0532	15.657	13.2562	23.7372	UP
contig38623	26.746	14.1014	10.398	21.8291	UP
contig38705	39.1314	28.3225	31.1827	54.9089	UP	AT4G31470.1	CAP (Cysteine-rich secretory proteins Antigen 5 and Pathogenesis-related 1 protein) superfamily protein
contig38718	23.1154	16.0395	9.65999	27.8778	UP	AT1G62790.1	Bifunctional inhibitor/lipid-transfer protein/seed storage 2S albumin superfamily protein
contig38865	16.3917	7.7586	6.72863	24.5122	UP
contig38924	20.7531	12.9	9.91512	20.3482	UP
contig39416	14.3232	13.8344	8.22138	21.379	UP	AT3G12700.1	Eukaryotic aspartyl protease family protein
contig40140	27.7129	13.015	16.2488	29.0645	UP
contig40161	23.5732	39.2644	14.2189	26.3658	UP
contig40457	28.7657	16.7522	18.1238	34.8117	UP	AT1G44100.1	amino acid permease 5
contig40462	66.342	35.4768	26.6116	68.7669	UP	AT4G15800.1	ralf-like 33
contig40681	16.2751	7.77931	8.72992	20.6046	UP
contig40773	10.4637	4.41772	8.61147	28.5304	UP
contig40869	23.7996	23.117	17.1101	40.2809	UP
contig41147	36.2352	25.0693	22.4353	40.9993	UP
contig41448	40.5101	25.4837	27.0061	50.979	UP	AT5G06970.1	Protein of unknown function (DUF810)
contig41703	19.761	6.82864	6.85986	21.4413	UP
contig42407	38.1029	55.0421	37.7265	72.8733	UP
contig42615	20.7152	15.8934	13.6227	23.8765	UP
contig43033	22.5064	23.2742	11.5393	24.0461	UP
contig43093	59.8249	54.5066	47.2365	81.6286	UP	AT3G18280.1	Bifunctional inhibitor/lipid-transfer protein/seed storage 2S albumin superfamily protein
contig43109	17.7677	9.1823	11.9109	21.4519	UP
contig43233	16.6904	9.3044	8.95792	20.0421	UP	AT1G48090.1	calcium-dependent lipid-binding family protein
contig43291	40.9794	23.0806	26.1626	49.9198	UP
contig43582	0.387601	298.228	5.39318	92.916	UP	AT1G09240.1	nicotianamine synthase 3
contig43932	16.7306	14.6597	23.5442	40.9208	UP	AT5G60020.1	laccase 17
contig44156	23.4464	20.0942	17.7203	32.8262	UP	AT4G09990.1	Protein of unknown function (DUF579)
contig44437	55.0722	36.0402	30.574	58.4755	UP
contig44454	28.9336	11.9366	17.7748	30.7658	UP	AT5G23570.1	XS domain-containing protein / XS zinc finger domain-containing protein-related
contig44461	22.0731	10.3967	11.491	21.5912	UP	AT1G60200.1	splicing factor PWI domain-containing protein / RNA recognition motif (RRM)-containing protein
contig44505	30.6753	35.3513	21.9562	41.0307	UP	AT2G40370.1	laccase 5
contig44593	25.5607	16.1292	20.83	37.2455	UP	AT2G16940.2	Splicing factor CC1-like
contig44596	31.7279	18.659	19.5976	37.093	UP
contig44656	15.6733	12.0159	12.6997	22.0541	UP
contig44736	24.9849	12.2719	15.3316	26.194	UP
contig44881	21.9339	13.3683	21.6131	38.3358	UP	AT5G05390.1	laccase 12
contig44935	24.1993	13.6086	17.693	35.9626	UP
contig44973	12.5113	10.4641	10.6563	20.023	UP	AT3G02850.1	STELAR K+ outward rectifier
contig45009	20.5568	20.9305	16.223	31.1843	UP	AT1G48410.2	Stabilizer of iron transporter SufD / Polynucleotidyl transferase
contig45131	22.9607	17.5396	8.79105	25.4607	UP	AT1G52150.2	Homeobox-leucine zipper family protein / lipid-binding START domain-containing protein
contig45204	21.0562	22.3191	11.5054	30.9438	UP	AT1G27450.3	adenine phosphoribosyl transferase 1
contig45344	21.9152	11.3176	16.0519	32.4985	UP	AT1G20610.1	Cyclin B2;3
contig45569	27.9706	20.3448	16.3147	34.1322	UP
contig45620	27.0326	15.882	19.4438	35.6398	UP
contig46446	31.4031	16.6995	27.3268	59.8746	UP	AT3G06400.3	chromatin-remodeling protein 11
contig46783	28.1261	27.551	19.5956	51.6623	UP
contig46873	39.4984	16.0635	10.1581	42.8375	UP
contig47489	61.4965	19.9006	11.9751	61.7375	UP	AT3G07480.1	2Fe-2S ferredoxin-like superfamily protein
contig47690	45.9737	24.7207	30.3627	54.102	UP
contig47875	38.0293	15.6333	19.2604	44.9436	UP
contig4809	37.9742	23.9105	28.2518	50.1949	UP	AT5G63120.2	P-loop containing nucleoside triphosphate hydrolases superfamily protein
contig4820	33.9607	47.2112	31.8624	65.1154	UP
contig48722	13.2016	3.39675	10.7478	23.8955	UP
contig4894	123.948	54.1785	71.7421	197.267	UP
contig49133	22.8835	13.5768	14.0812	26.0932	UP	AT3G48700.1	carboxyesterase 13
contig4988	27.469	20.5725	12.3366	23.2428	UP	AT3G22600.1	Bifunctional inhibitor/lipid-transfer protein/seed storage 2S albumin superfamily protein
contig49986	22.2555	9.54245	12.1348	25.1276	UP
contig50022	25.5973	22.5565	19.8027	33.7601	UP	AT1G54690.1	gamma histone variant H2AX
contig50261	21.0659	16.6792	14.7625	33.5241	UP
contig50644	16.8358	12.6974	7.44616	21.385	UP
contig5083	10.4422	8.46663	16.6996	31.0146	UP
contig5115	92.1783	46.2038	35.8854	68.8906	UP	AT4G34880.1	Amidase family protein
contig51359	25.3608	16.6071	9.89725	26.1304	UP
contig51648	14.7577	8.00152	12.47	23.0103	UP	AT5G64030.1	S-adenosyl-L-methionine-dependent methyltransferases superfamily protein
contig51803	17.5068	8.34014	11.3858	20.1322	UP	AT1G55810.1	uridine kinase-like 3
contig51926	28.3569	9.93217	13.6991	26.9777	UP	AT5G08500.1	Transmembrane CLPTM1 family protein
contig51937	21.9932	12.2067	10.0216	20.0553	UP
contig52535	24.7278	16.7935	16.2146	33.015	UP
contig52655	22.3056	16.5949	15.2616	30.5737	UP
contig53333	29.1502	13.4551	14.3799	28.5639	UP
contig53679	44.5029	22.4085	20.2352	45.4435	UP
contig53725	39.0591	26.3506	12.6282	33.3621	UP	AT1G52360.2	Coatomer beta' subunit
contig54018	21.3484	23.6075	15.4165	36.4395	UP
contig54061	30.0752	17.541	22.2658	43.2738	UP
contig54531	11.3289	9.84484	11.6917	20.6641	UP	AT1G76470.1	NAD(P)-binding Rossmann-fold superfamily protein
contig54607	18.4397	9.18224	14.6149	29.1806	UP
contig54868	38.5732	42.1796	29.581	52.6062	UP	AT5G02260.1	expansin A9
contig5511	155.665	111.368	110.589	211.296	UP
contig55563	39.179	41.6701	27.4715	50.2188	UP
contig5692	20.4705	17.4348	16.2438	30.5477	UP	AT5G10770.1	Eukaryotic aspartyl protease family protein
contig56933	26.9296	19.7093	12.509	24.4061	UP
contig56971	28.0338	18.819	23.1236	46.3205	UP
contig57351	64.7206	24.0645	23.9458	72.8926	UP
contig5796	4.42076	3.33025	9.55511	31.3066	UP
contig58266	11.4002	5.02414	5.95991	21.0521	UP	AT4G38350.2	Patched family protein
contig58465	27.8182	12.9862	11.5968	27.6762	UP
contig58555	23.4178	16.0654	17.7873	30.1649	UP	AT5G65000.1	Nucleotide-sugar transporter family protein
contig58681	31.6433	21.061	17.8765	32.167	UP
contig58989	12.6537	11.1698	14.3955	24.4158	UP	AT4G10850.1	Nodulin MtN3 family protein
contig59107	15.2875	7.95644	7.64747	25.6468	UP
contig59494	48.7856	36.7277	31.5261	60.2491	UP	AT4G15800.1	ralf-like 33
contig60527	13.9433	10.8328	17.8778	31.1713	UP
contig61318	29.4814	12.993	8.47858	36.361	UP
contig61400	33.4309	14.685	21.4616	47.6102	UP
contig61471	86.9835	81.927	63.7231	123.512	UP
contig61812	19.6278	10.371	10.8268	20.8391	UP
contig61889	28.025	29.7822	16.1242	32.0349	UP	AT2G36100.1	Uncharacterised protein family (UPF0497)
contig61996	21.7757	34.6431	18.1246	43.2017	UP
contig62094	23.7138	28.9065	28.0723	59.1376	UP	AT5G05340.1	Peroxidase superfamily protein
contig6261	7.93606	7.79229	17.6162	61.9413	UP
contig6269	21.8034	11.5053	12.001	27.9387	UP	AT3G61570.1	GRIP-related ARF-binding domain-containing protein 1
contig62796	25.0988	11.1436	10.8036	22.5429	UP
contig62838	18.7875	20.111	10.921	22.5598	UP
contig63001	16.4724	12.8178	10.0866	23.3289	UP	AT3G24240.1	Leucine-rich repeat receptor-like protein kinase family protein
contig63332	38.9893	23.1449	20.7467	40.2332	UP
contig63613	25.6395	20.0842	15.9409	27.265	UP
contig64834	39.7256	33.694	27.0231	58.278	UP	AT5G61840.1	Exostosin family protein
contig65103	19.1431	4.28169	5.46152	20.3523	UP	AT4G39300.1	unknown protein; FUNCTIONS IN: molecular_function unknown; INVOLVED IN: biological_process unknown; LOCATED IN: chloroplast; EXPRESSED IN: 22 plant structures; EXPRESSED DURING: 13 growth stages; Has 30201 Blast hits to 17322 proteins in 780 species: Archae - 12; Bacteria - 1396; Metazoa - 17338; Fungi - 3422; Plants - 5037; Viruses - 0; Other Eukaryotes - 2996 (source: NCBI BLink).
contig65458	36.8769	19.8694	23.9883	46.9607	UP
contig65667	25.0004	20.106	11.9754	21.1938	UP
contig65873	35.0355	18.8999	22.127	37.7071	UP
contig6594	26.8419	17.5734	14.0906	24.737	UP	AT5G05340.1	Peroxidase superfamily protein
contig66342	11.5735	7.73785	8.38563	23.3319	UP
contig67195	20.2852	12.3642	10.9992	20.0541	UP
contig67674	0.244354	58.4434	1.87406	65.5028	UP
contig687	12.6583	19.8306	11.8165	20.0934	UP	AT2G44280.1	Major facilitator superfamily protein
contig69089	9.8954	10.1946	7.07945	61.0297	UP
contig70463	28.1091	16.1569	16.6842	30.2178	UP
contig70473	17.739	12.6308	15.7271	27.6944	UP	AT1G28600.1	GDSL-like Lipase/Acylhydrolase superfamily protein
contig70665	13.5205	18.9811	14.4086	45.5998	UP	AT5G05250.1	unknown protein; BEST Arabidopsis thaliana protein match is: unknown protein (TAIR:AT3G56360.1); Has 30201 Blast hits to 17322 proteins in 780 species: Archae - 12; Bacteria - 1396; Metazoa - 17338; Fungi - 3422; Plants - 5037; Viruses - 0; Other Eukaryotes - 2996 (source: NCBI BLink).
contig70926	26.6651	17.0356	12.4874	23.4536	UP	AT1G73630.1	EF hand calcium-binding protein family
contig71066	59.0991	92.7041	59.6018	108.861	UP
contig71461	14.418	10.28	9.08119	20.9263	UP
contig71809	13.3362	6.84237	16.4994	29.6039	UP
contig71963	17.8264	12.6093	16.3112	30.2633	UP	AT2G43610.1	Chitinase family protein
contig7211	22.6001	20.0051	14.674	31.5123	UP	AT5G41040.1	HXXXD-type acyl-transferase family protein
contig72264	27.2964	22.6427	11.897	20.5335	UP
contig72594	37.0241	46.0015	46.8313	102.054	UP
contig72943	19.0414	13.2239	16.6106	29.463	UP
contig7395	19.7501	8.04059	18.2953	34.9802	UP	AT5G55920.1	S-adenosyl-L-methionine-dependent methyltransferases superfamily protein
contig7396	17.0436	8.50253	17.949	34.652	UP	AT5G55920.1	S-adenosyl-L-methionine-dependent methyltransferases superfamily protein
contig74227	29.9242	13.635	15.2261	27.5111	UP
contig74563	29.3408	27.2077	24.0885	45.4072	UP
contig74679	37.3455	38.9277	18.2728	33.0939	UP
contig75692	18.9566	11.7373	9.30604	20.0788	UP
contig75820	24.974	11.5966	9.41207	24.6691	UP
contig75864	15.9582	10.8532	12.5388	21.6511	UP
contig76098	0.806437	116.039	10.6206	36.8918	UP	AT1G56430.1	nicotianamine synthase 4
contig76159	17.0252	11.0184	6.65188	26.7775	UP	AT2G02220.1	phytosulfokin receptor 1
contig7633	20.4075	17.9612	11.2836	22.567	UP	AT3G22600.1	Bifunctional inhibitor/lipid-transfer protein/seed storage 2S albumin superfamily protein
contig76350	11.1953	8.35618	2.07937	35.4903	UP
contig77337	20.2151	17.4609	18.5172	34.5207	UP
contig77356	28.0252	23.1101	20.6135	39.8701	UP
contig78515	33.8314	19.2439	15.5432	27.7088	UP
contig78528	54.2505	45.6318	35.7349	60.7667	UP
contig78714	14.1507	8.99609	9.39162	20.5607	UP
contig7877	35.9332	20.3824	25.4152	46.9899	UP	AT3G43300.1	HOPM interactor 7
contig79465	18.7727	15.1622	11.6052	27.0431	UP
contig7968	160.564	131.473	120.694	208.207	UP	AT5G10770.1	Eukaryotic aspartyl protease family protein
contig80241	0.17077	0	6.20496	23.8088	UP
contig80348	19.0732	13.2059	10.8812	21.4395	UP
contig8097	23.368	21.0952	20.2555	34.8363	UP	AT1G79620.1	Leucine-rich repeat protein kinase family protein
contig81376	28.0237	14.1902	6.57254	27.5927	UP
contig81618	27.5336	20.264	12.466	30.7147	UP	AT5G61840.1	Exostosin family protein
contig81835	11.4728	12.7427	18.1035	31.5274	UP	AT2G16060.1	hemoglobin 1
contig82086	31.2432	26.1764	48.0254	95.4729	UP
contig82144	38.9262	32.3122	26.1132	58.9875	UP
contig84193	22.9434	9.44444	13.7123	30.3567	UP
contig8509	171.29	92.5263	91.8275	157.13	UP	AT5G43970.1	translocase of outer membrane 22-V
contig8538	33.0629	17.6997	20.2429	44.8682	UP	AT5G13000.1	glucan synthase-like 12
contig8831	34.561	16.8728	21.144	39.7703	UP	AT4G20850.1	tripeptidyl peptidase ii
contig885	41.1649	28.119	26.9997	47.3504	UP	AT5G64080.1	Bifunctional inhibitor/lipid-transfer protein/seed storage 2S albumin superfamily protein
contig89530	14.6957	9.9744	9.3706	22.0564	UP
contig9182	116.552	52.9162	66.7932	195.14	UP
contig9190	27.8315	16.108	16.0206	31.9326	UP
contig92374	19.8885	13.4743	15.3566	30.5099	UP
contig9282	26.1493	14.6647	18.5179	33.6999	UP	AT4G12770.1	Chaperone DnaJ-domain superfamily protein
contig9495	136.664	140.188	70.5776	163.705	UP
contig96575	48.7469	20.7584	18.9792	49.2505	UP
contig970	19.5437	11.7507	10.4893	22.1475	UP
contig97062	0.0667761	0.0552745	15.3712	26.0693	UP	AT3G17450.1	hAT dimerisation domain-containing protein
contig9734	38.2074	17.354	22.8509	40.8909	UP	AT3G18190.1	TCP-1/cpn60 chaperonin family protein
contig9888	25.9428	13.0414	14.1451	27.0909	UP	AT5G04560.2	HhH-GPD base excision DNA repair family protein
contig99450	13.827	10.7027	4.85856	24.754	UP
