# Supplementary material for: Molecular Responses to Cadmium Exposure in Two Contrasting Durum Wheat Genotypes
Source: Int J Mol Sci. 2021 Jul 8;22(14):7343. doi: 10.3390/ijms22147343 (PMC8306872; doi:10.3390/ijms22147343)
Supplement: Supplementary file 1 [file ijms-22-07343-s001.zip › Table S7_Down-regulated only in H-Cd treated plants.xlsx]

## Sheet: Foglio1
Contig_id	L_root_CTRL	L_root_CD	H_root_CTRL	H_root_CD	H Root CTRL Vs CD	AGI code	Annotation
contig10069	202.681	105.25	251.239	62.2966	DOWN	AT5G56010.1	heat shock protein 81-3
contig10083	2105.21	3193.02	3325.36	1367.03	DOWN	AT5G60390.1	GTP binding Elongation factor Tu family protein
contig10088	17.228	22.5009	47.9554	12.0355	DOWN	AT2G16400.1	BEL1-like homeodomain 7
contig100932	0.526508	2.54071	20.2779	1.93713	DOWN
contig10098	72.9901	115.075	359.28	106.338	DOWN	AT5G27760.1	Hypoxia-responsive family protein
contig10196	14.2764	20.8894	30.6869	10.7224	DOWN	AT1G15130.1	Endosomal targeting BRO1-like domain-containing protein
contig10249	91.2949	136.11	245.145	78.7878	DOWN	AT2G41430.1	dehydration-induced protein (ERD15)
contig10280	31.2567	19.1557	41.551	14.5696	DOWN	AT5G47060.1	Protein of unknown function (DUF581)
contig10332	21.8175	21.904	38.4308	13.4967	DOWN	AT3G57260.1	beta-1 3-glucanase 2
contig103680	21.8145	30.8573	22.1287	7.01331	DOWN
contig10390	95.8154	143.027	184.698	63.436	DOWN	AT4G05050.1	ubiquitin 11
contig10423	9.23645	11.8954	24.3435	5.76272	DOWN	AT3G14690.1	cytochrome P450 family 72 subfamily A polypeptide 15
contig10433	21.7892	29.2062	32.728	12.5481	DOWN
contig1053	18.4926	12.0383	40.5145	6.00026	DOWN	AT4G25790.1	CAP (Cysteine-rich secretory proteins Antigen 5 and Pathogenesis-related 1 protein) superfamily protein
contig10657	14.6385	18.1104	28.5952	9.60419	DOWN	AT1G49050.1	Eukaryotic aspartyl protease family protein
contig107112	2.33542	1.88438	27.5091	8.76549	DOWN
contig107416	1.08409	2.27693	22.3388	8.99889	DOWN	AT5G25940.1	early nodulin-related
contig10752	74.1516	92.2929	150.785	59.0002	DOWN	AT5G65750.1	2-oxoglutarate dehydrogenase E1 component
contig107551	10.3164	15.2153	41.0022	8.93348	DOWN
contig1076	36.9345	53.6807	81.389	33.5199	DOWN	AT3G52990.1	Pyruvate kinase family protein
contig10823	34.7261	45.9592	57.1233	21.875	DOWN	AT4G24160.1	alpha/beta-Hydrolases superfamily protein
contig1089	29.113	38.94	101.546	41.4624	DOWN	AT2G21940.4	shikimate kinase 1
contig1090	11.686	15.4306	38.0301	12.5079	DOWN	AT4G26270.1	phosphofructokinase 3
contig1091	7.89941	10.7267	24.7233	5.83573	DOWN	AT4G26270.1	phosphofructokinase 3
contig109164	13.0683	19.3109	20.7152	6.49466	DOWN
contig109460	7.61811	8.78107	109.647	30.6733	DOWN
contig10961	60.6295	62.0385	85.988	31.166	DOWN	AT4G25760.1	glutamine dumper 2
contig10964	44.9322	70.004	89.1251	37.3263	DOWN
contig1110	9.74503	11.8072	27.7331	6.98774	DOWN	AT3G16560.1	Protein phosphatase 2C family protein
contig11153	16.121	22.0767	45.5982	15.1848	DOWN	AT2G22125.1	binding
contig11159	15.0226	21.6603	24.2208	9.81316	DOWN	AT5G48150.1	GRAS family transcription factor
contig1127	80.0938	46.6116	238.099	98.0428	DOWN
contig113142	8.07772	3.92688	55.5143	15.9753	DOWN
contig11349	10.2483	14.1711	26.8939	9.48199	DOWN	AT5G07990.1	Cytochrome P450 superfamily protein
contig113767	17.5268	17.8488	21.6416	8.03221	DOWN
contig115324	6.4036	3.0141	89.136	21.1607	DOWN	AT4G10270.1	Wound-responsive family protein
contig11595	59.2011	75.3528	96.0751	23.1368	DOWN	AT1G56070.1	Ribosomal protein S5/Elongation factor G/III/V family protein
contig11598	33.0362	49.5203	57.5266	17.6455	DOWN
contig11619	26.3992	29.3391	54.8896	21.5615	DOWN	AT2G42880.1	MAP kinase 20
contig116454	62.1558	50.0891	59.8775	14.8833	DOWN	AT4G22990.2	Major Facilitator Superfamily with SPX (SYG1/Pho81/XPR1) domain-containing protein
contig11671	28.7819	16.7404	40.1272	8.20526	DOWN	AT4G21680.1	NITRATE TRANSPORTER 1.8
contig11706	20.8709	26.3839	45.8093	16.1369	DOWN	AT5G05440.1	Polyketide cyclase/dehydrase and lipid transport superfamily protein
contig11746	600.229	651.655	779.834	278.306	DOWN	AT3G48140.1	B12D protein
contig1179	207.166	295.182	371.216	118.836	DOWN	AT1G56070.1	Ribosomal protein S5/Elongation factor G/III/V family protein
contig1180	99.6429	133.499	194.628	74.0275	DOWN	AT1G56070.1	Ribosomal protein S5/Elongation factor G/III/V family protein
contig1181	92.736	137.213	192.814	74.7633	DOWN	AT1G56070.1	Ribosomal protein S5/Elongation factor G/III/V family protein
contig118100	23.399	39.0222	26.2776	9.97117	DOWN	AT5G10770.1	Eukaryotic aspartyl protease family protein
contig1182	16.7574	20.8426	33.4715	10.4825	DOWN	AT1G56070.1	Ribosomal protein S5/Elongation factor G/III/V family protein
contig118389	5.88116	5.29756	112.187	24.4482	DOWN	AT4G10270.1	Wound-responsive family protein
contig11851	86.2024	78.8416	134.951	45.8083	DOWN	AT4G35150.1	O-methyltransferase family protein
contig11853	9.79463	4.59286	21.246	5.82011	DOWN	AT3G14630.1	cytochrome P450 family 72 subfamily A polypeptide 9
contig11871	171.689	230.98	205.464	27.4922	DOWN	AT1G71695.1	Peroxidase superfamily protein
contig118886	23.3149	12.6896	39.4743	7.14573	DOWN
contig11900	19.7194	26.597	26.8754	10.6521	DOWN	AT5G53160.2	regulatory components of ABA receptor 3
contig12083	40.6386	48.5796	50.706	14.5512	DOWN	AT5G02090.1	unknown protein; Has 30 Blast hits to 30 proteins in 10 species: Archae - 0; Bacteria - 0; Metazoa - 0; Fungi - 0; Plants - 30; Viruses - 0; Other Eukaryotes - 0 (source: NCBI BLink).
contig12095	57.9706	83.7481	127.689	49.7094	DOWN	AT4G35160.1	O-methyltransferase family protein
contig1211	454.957	534.904	1012.85	319.671	DOWN	AT3G04120.1	glyceraldehyde-3-phosphate dehydrogenase C subunit 1
contig12112	11.6911	19.6975	38.1032	12.1036	DOWN	AT5G54160.1	O-methyltransferase 1
contig121961	32.7452	54.3719	65.7748	5.4603	DOWN	AT1G73010.1	phosphate starvation-induced gene 2
contig122193	2.06666	2.41115	45.5108	5.72629	DOWN	AT1G33055.1	unknown protein; FUNCTIONS IN: molecular_function unknown; INVOLVED IN: anaerobic respiration; LOCATED IN: endomembrane system; EXPRESSED IN: 13 plant structures; EXPRESSED DURING: 6 growth stages; Has 20 Blast hits to 20 proteins in 8 species: Archae - 0; Bacteria - 0; Metazoa - 0; Fungi - 0; Plants - 20; Viruses - 0; Other Eukaryotes - 0 (source: NCBI BLink).
contig1224	17.3997	25.1297	29.8513	11.2422	DOWN	AT5G53480.1	ARM repeat superfamily protein
contig12295	12.4137	20.218	26.0855	8.87875	DOWN	AT5G24260.1	prolyl oligopeptidase family protein
contig12296	19.5523	21.2616	38.886	16.0163	DOWN	AT5G50920.1	CLPC homologue 1
contig12321	7.67354	10.6255	23.8273	7.78327	DOWN	AT1G21410.1	F-box/RNI-like superfamily protein
contig12358	193.287	302.477	297.246	117.682	DOWN	AT5G10860.1	Cystathionine beta-synthase (CBS) family protein
contig12359	237.937	380.399	367.171	148.796	DOWN	AT5G10860.1	Cystathionine beta-synthase (CBS) family protein
contig1246	51.1766	81.6787	79.6683	33.3359	DOWN	AT4G05050.1	ubiquitin 11
contig124743	20.1708	24.617	25.6422	8.1195	DOWN
contig126163	0.394786	1.04275	24.0138	3.08257	DOWN	AT1G33055.1	unknown protein; FUNCTIONS IN: molecular_function unknown; INVOLVED IN: anaerobic respiration; LOCATED IN: endomembrane system; EXPRESSED IN: 13 plant structures; EXPRESSED DURING: 6 growth stages; Has 20 Blast hits to 20 proteins in 8 species: Archae - 0; Bacteria - 0; Metazoa - 0; Fungi - 0; Plants - 20; Viruses - 0; Other Eukaryotes - 0 (source: NCBI BLink).
contig12686	42.4941	66.9423	58.8747	23.0662	DOWN
contig12811	11.431	18.821	23.1636	8.87685	DOWN	AT2G26170.1	cytochrome P450 family 711 subfamily A polypeptide 1
contig128348	8.30596	6.94292	114.073	29.2469	DOWN	AT4G10270.1	Wound-responsive family protein
contig12846	44.2238	73.5985	89.9147	34.4597	DOWN	AT3G01910.1	sulfite oxidase
contig1293	15.4829	24.8657	29.6898	7.70674	DOWN	AT1G34210.1	somatic embryogenesis receptor-like kinase 2
contig12939	12.5654	16.1182	25.3814	9.3789	DOWN	AT3G13050.1	Major facilitator superfamily protein
contig1302	27.8785	43.9335	50.2075	17.4262	DOWN	AT1G58030.1	cationic amino acid transporter 2
contig130911	1.08441	1.21565	24.3321	5.40456	DOWN
contig131248	3.73609	1.41885	21.3496	5.7439	DOWN
contig13131	18.3361	21.1933	29.7096	11.9436	DOWN	AT1G34040.1	Pyridoxal phosphate (PLP)-dependent transferases superfamily protein
contig13154	19.1009	9.6522	63.2356	10.7833	DOWN
contig13191	0.103174	0.277115	97.7942	34.2125	DOWN	AT1G01620.1	plasma membrane intrinsic protein 1C
contig131984	95.0167	44.3818	69.2731	16.5762	DOWN
contig13241	24.7664	23.4648	85.6814	28.9221	DOWN
contig13259	112.444	86.9752	52.7567	22.1686	DOWN	AT1G71695.1	Peroxidase superfamily protein
contig13311	19.8891	32.6864	34.8222	13.9058	DOWN	AT3G06580.1	Mevalonate/galactokinase family protein
contig133392	0.556016	1.11393	21.8391	7.30957	DOWN	AT5G25940.1	early nodulin-related
contig13370	16.5092	15.9169	30.4413	12.7972	DOWN	AT2G39570.1	ACT domain-containing protein
contig13409	29.2535	47.4478	36.495	14.8825	DOWN	AT3G06580.1	Mevalonate/galactokinase family protein
contig13475	19.2769	21.0983	34.1449	10.6185	DOWN	AT2G23780.1	RING/U-box superfamily protein
contig13476	55.0435	56.1863	85.6507	35.0812	DOWN	AT1G19310.1	RING/U-box superfamily protein
contig1351	15.2542	13.9623	22.3202	8.30657	DOWN	AT5G60600.1	4-hydroxy-3-methylbut-2-enyl diphosphate synthase
contig1358	8.30585	11.6849	24.915	7.63642	DOWN	AT1G78900.1	vacuolar ATP synthase subunit A
contig13622	5.44525	7.88273	29.2592	8.18548	DOWN	AT1G01720.1	NAC (No Apical Meristem) domain transcriptional regulator superfamily protein
contig13655	18.2122	26.0441	28.8472	11.7114	DOWN	AT1G14740.1	Protein of unknown function (DUF1423)
contig13699	9.42119	15.2767	26.0268	10.969	DOWN	AT1G20160.1	Subtilisin-like serine endopeptidase family protein
contig13713	20.121	30.4837	34.4191	12.9508	DOWN
contig138572	8.11697	8.27261	114.218	37.9349	DOWN
contig13934	14.393	22.7513	29.4147	11.6647	DOWN	AT3G48530.1	SNF1-related protein kinase regulatory subunit gamma 1
contig14003	20.2979	8.80408	24.9965	9.66023	DOWN	AT1G79930.1	heat shock protein 91
contig14014	9.85479	15.3302	25.549	3.35892	DOWN	AT4G13420.1	high affinity K+ transporter 5
contig14099	9.40739	11.3703	22.7869	4.54392	DOWN	AT2G21520.2	Sec14p-like phosphatidylinositol transfer family protein
contig14300	20.9318	29.8753	81.334	29.7759	DOWN	AT1G25280.1	tubby like protein 10
contig14487	1.86668	1.98625	37.2433	10.4989	DOWN	AT1G77120.1	alcohol dehydrogenase 1
contig145171	0.830485	0.5294	26.866	0.669786	DOWN	AT1G68510.1	LOB domain-containing protein 42
contig145907	29.4744	38.8342	56.368	18.2247	DOWN	AT3G09840.1	cell division cycle 48
contig14609	28.9846	20.8107	28.8669	9.38781	DOWN	AT4G26830.1	O-Glycosyl hydrolases family 17 protein
contig14623	63.0757	69.3203	120.823	43.5604	DOWN	AT2G33590.1	NAD(P)-binding Rossmann-fold superfamily protein
contig1464	73.0241	107.121	139.183	57.5664	DOWN	AT3G25800.1	protein phosphatase 2A subunit A2
contig14671	13.929	21.503	34.9878	11.4315	DOWN	AT5G65750.1	2-oxoglutarate dehydrogenase E1 component
contig14679	26.7852	21.7906	32.3887	11.2206	DOWN	AT1G76140.1	Prolyl oligopeptidase family protein
contig14680	8.60771	7.94881	22.7776	7.29596	DOWN	AT1G76140.1	Prolyl oligopeptidase family protein
contig14748	9.74607	16.0834	32.3613	12.1167	DOWN	AT2G19810.1	CCCH-type zinc finger family protein
contig14778	79.1601	129.74	147.364	40.0739	DOWN	AT1G68300.1	Adenine nucleotide alpha hydrolases-like superfamily protein
contig14796	13.3409	19.8651	49.0449	9.57133	DOWN	AT1G80160.1	Lactoylglutathione lyase / glyoxalase I family protein
contig14798	42.4412	41.5051	72.2547	25.9954	DOWN
contig14854	14.584	15.0119	24.4384	8.30317	DOWN	AT5G49910.1	chloroplast heat shock protein 70-2
contig14855	11.377	13.051	20.3301	7.36645	DOWN	AT5G49910.1	chloroplast heat shock protein 70-2
contig14904	51.2444	82.8545	99.4323	25.728	DOWN	AT4G35160.1	O-methyltransferase family protein
contig150492	10.632	16.611	23.7105	9.02116	DOWN
contig15065	27.9972	45.7676	32.4915	12.5837	DOWN	AT5G63620.1	GroES-like zinc-binding alcohol dehydrogenase family protein
contig15068	9.79727	14.4915	26.453	6.49709	DOWN
contig15086	10.9449	12.6412	34.0141	8.55002	DOWN	AT2G41250.1	Haloacid dehalogenase-like hydrolase (HAD) superfamily protein
contig1512	125.093	188.773	234.275	88.843	DOWN	AT1G10370.1	Glutathione S-transferase family protein
contig15205	17.1984	18.0053	37.7835	15.4014	DOWN	AT1G72360.2	Integrase-type DNA-binding superfamily protein
contig15237	52.8525	86.521	88.5641	33.9107	DOWN	AT4G05050.1	ubiquitin 11
contig15369	24.5065	14.1149	24.1123	8.74569	DOWN	AT1G22900.1	Disease resistance-responsive (dirigent-like protein) family protein
contig15438	96.6492	159.384	204.477	60.054	DOWN	AT2G02990.1	ribonuclease 1
contig1545	18.8809	18.233	26.1239	9.72784	DOWN	AT1G58290.1	Glutamyl-tRNA reductase family protein
contig155078	0.446721	0.681996	26.6108	1.16795	DOWN	AT3G25270.1	Ribonuclease H-like superfamily protein
contig155715	1.68344	0.671809	30.8035	0.970049	DOWN
contig15615	107.946	121.398	150.805	61.4859	DOWN	AT5G19890.1	Peroxidase superfamily protein
contig156251	0.676849	7.97258	33.1296	7.12053	DOWN	AT5G25940.1	early nodulin-related
contig156454	0.526857	1.89351	31.1165	5.55854	DOWN
contig156648	0.421439	2.21568	25.8511	3.15596	DOWN	AT1G21250.1	cell wall-associated kinase
contig156659	0.963892	2.7489	33.5739	4.66444	DOWN
contig157100	0.204367	2.26189	31.4283	1.05414	DOWN	AT1G80820.1	cinnamoyl coa reductase
contig15802	10.2602	11.7151	26.6444	10.2965	DOWN	AT2G02790.1	IQ-domain 29
contig15810	9.21198	6.05164	25.2636	2.93719	DOWN	AT3G47420.1	phosphate starvation-induced gene 3
contig15814	58.2589	79.8716	105.314	31.0126	DOWN
contig15982	18.088	22.2054	27.2685	10.7288	DOWN	AT3G53180.1	glutamate-ammonia ligases;catalytics;glutamate-ammonia ligases
contig15999	73.6328	92.0156	160.634	60.5079	DOWN	AT2G32730.1	26S proteasome regulatory complex non-ATPase subcomplex Rpn2/Psmd1 subunit
contig16049	86.1347	63.964	94.8498	21.7291	DOWN	AT2G26660.1	SPX domain gene 2
contig16060	10.1319	5.38666	23.6114	2.7529	DOWN	AT4G16260.1	Glycosyl hydrolase superfamily protein
contig16171	34.8626	54.257	55.7409	20.5356	DOWN	AT1G32780.1	GroES-like zinc-binding dehydrogenase family protein
contig16194	33.9969	49.8576	70.032	27.2332	DOWN	AT5G55850.2	RPM1-interacting protein 4 (RIN4) family protein
contig16252	19.6564	26.6173	32.6711	11.6563	DOWN	AT4G21640.1	Subtilase family protein
contig163642	22.0701	29.7867	41.4659	14.1569	DOWN
contig16383	11.9447	16.0075	26.2057	8.85195	DOWN	AT1G62020.1	Coatomer alpha subunit
contig1658	14.6603	20.7797	23.3662	9.70676	DOWN	AT2G20370.1	Exostosin family protein
contig16686	68.3956	94.1767	116.971	40.1672	DOWN	AT3G05950.1	RmlC-like cupins superfamily protein
contig166978	102.481	56.176	45.6772	15.0709	DOWN	AT5G48485.1	Bifunctional inhibitor/lipid-transfer protein/seed storage 2S albumin superfamily protein
contig167242	33.6942	51.6241	88.4158	18.96	DOWN	AT2G02250.1	phloem protein 2-B2
contig167276	20.6711	25.7007	58.6354	11.0935	DOWN	AT3G16770.1	ethylene-responsive element binding protein
contig167707	16.1235	25.9046	60.9722	8.39016	DOWN	AT3G14230.1	related to AP2 2
contig16811	12.2179	17.5665	39.9728	8.87287	DOWN
contig168197	165.218	184.58	96.3819	18.4747	DOWN
contig168206	3.48736	5.20013	24.6381	2.84662	DOWN	AT1G43160.1	related to AP2 6
contig16845	92.8089	136.245	187.235	76.2028	DOWN	AT5G54500.2	flavodoxin-like quinone reductase 1
contig168617	7.05637	8.46309	25.5293	7.2143	DOWN
contig16862	10.5432	10.7701	23.2447	9.34242	DOWN	AT1G49340.2	Phosphatidylinositol 3- and 4-kinase family protein
contig16904	15.9147	14.7885	21.8581	9.19888	DOWN
contig16913	16.8867	11.8655	30.648	11.7811	DOWN	AT5G07680.1	NAC domain containing protein 80
contig16926	37.6183	63.2263	39.8305	7.14243	DOWN	AT1G71695.1	Peroxidase superfamily protein
contig17002	5.68385	8.40561	23.7631	7.35813	DOWN	AT1G72210.1	basic helix-loop-helix (bHLH) DNA-binding superfamily protein
contig1710	15.5214	15.195	23.0646	8.38751	DOWN	AT5G59310.1	lipid transfer protein 4
contig17120	19.513	15.3738	33.4597	10.3223	DOWN
contig17181	35.039	49.6816	48.6223	19.3873	DOWN	AT4G05050.1	ubiquitin 11
contig17256	10.5175	11.6282	32.1452	3.9375	DOWN	AT5G51440.1	HSP20-like chaperones superfamily protein
contig17335	20.9446	26.3914	22.0306	9.25258	DOWN	AT5G63620.1	GroES-like zinc-binding alcohol dehydrogenase family protein
contig17361	8.91526	12.5485	23.3119	4.95482	DOWN	AT5G60600.1	4-hydroxy-3-methylbut-2-enyl diphosphate synthase
contig17547	7.16596	7.20591	21.0233	5.64694	DOWN	AT5G64120.1	Peroxidase superfamily protein
contig17609	10.4464	12.8599	42.1319	16.0162	DOWN
contig17665	7.21763	3.12039	20.9282	6.46185	DOWN	AT3G14690.1	cytochrome P450 family 72 subfamily A polypeptide 15
contig17771	11.8941	17.0906	27.4354	8.93094	DOWN	AT2G21390.1	Coatomer alpha subunit
contig17841	116.692	132.275	172.836	59.4995	DOWN	AT1G56410.1	heat shock protein 70 (Hsp 70) family protein
contig17846	7.60567	10.1415	34.9257	12.7441	DOWN
contig17851	48.4595	37.2472	50.9805	20.4152	DOWN	AT5G19890.1	Peroxidase superfamily protein
contig1797	13.2888	21.8371	20.7369	6.84799	DOWN	AT5G04930.1	aminophospholipid ATPase 1
contig17979	14.6426	23.4545	32.671	11.0089	DOWN
contig18098	63.3643	102.364	105.689	28.8897	DOWN	AT5G05340.1	Peroxidase superfamily protein
contig18187	11.3947	9.96464	32.6162	3.11555	DOWN	AT2G36770.1	UDP-Glycosyltransferase superfamily protein
contig18208	17.997	16.342	57.8567	15.2805	DOWN	AT1G72720.1	Protein of unknown function (DUF3511)
contig18254	15.4181	18.5652	27.9398	8.47446	DOWN	AT4G27020.1	unknown protein; FUNCTIONS IN: molecular_function unknown; LOCATED IN: vacuole; BEST Arabidopsis thaliana protein match is: unknown protein (TAIR:AT5G54870.1); Has 1807 Blast hits to 1807 proteins in 277 species: Archae - 0; Bacteria - 0; Metazoa - 736; Fungi - 347; Plants - 385; Viruses - 0; Other Eukaryotes - 339 (source: NCBI BLink).
contig18285	19.2791	31.0112	30.1068	12.3046	DOWN	AT5G58490.1	NAD(P)-binding Rossmann-fold superfamily protein
contig18288	17.6421	21.3277	58.6445	12.9382	DOWN	AT5G62740.1	SPFH/Band 7/PHB domain-containing membrane-associated protein family
contig1830	34.6263	46.3749	72.2854	30.1513	DOWN	AT3G57260.1	beta-1 3-glucanase 2
contig18360	14.0793	21.3707	32.1403	12.0057	DOWN	AT1G62020.1	Coatomer alpha subunit
contig18526	7.44022	11.1488	21.8908	4.81964	DOWN	AT5G45910.1	GDSL-like Lipase/Acylhydrolase superfamily protein
contig18578	20.441	25.0089	26.6529	9.93804	DOWN
contig18590	73.7741	40.9928	107.475	27.4893	DOWN
contig18599	9.19052	11.6922	23.5519	8.01215	DOWN	AT1G12110.1	nitrate transporter 1.1
contig18629	10.3439	9.9553	21.6621	4.14866	DOWN	AT5G43580.1	Serine protease inhibitor potato inhibitor I-type family protein
contig18671	12.7021	7.08038	28.9582	9.64923	DOWN	AT3G14610.1	cytochrome P450 family 72 subfamily A polypeptide 7
contig18770	16.2364	22.1315	29.2917	11.7624	DOWN	AT1G17370.1	oligouridylate binding protein 1B
contig18830	83.1688	112.911	99.1115	35.2851	DOWN
contig18831	32.7249	40.4751	35.7001	14.232	DOWN
contig18878	17.7295	26.0363	29.6347	12.4876	DOWN	AT5G55480.1	SHV3-like 1
contig18891	3.22966	4.67553	30.1048	9.94634	DOWN	AT2G30490.1	cinnamate-4-hydroxylase
contig1914	26.4529	39.3493	47.9458	16.068	DOWN	AT2G18730.1	diacylglycerol kinase 3
contig19207	19.1545	23.1891	42.9467	14.6236	DOWN	AT1G20050.1	C-8 7 sterol isomerase
contig1928	12.4444	14.7518	22.1221	7.8097	DOWN	AT4G10710.1	global transcription factor C
contig1933	15.303	19.8005	21.8307	7.50438	DOWN	AT2G29065.1	GRAS family transcription factor
contig195	47.0872	76.9906	87.538	27.8908	DOWN	AT3G10740.1	alpha-L-arabinofuranosidase 1
contig19514	20.5415	27.8958	32.4916	13.0592	DOWN	AT1G65520.1	delta(3) delta(2)-enoyl CoA isomerase 1
contig19523	179.551	162.23	137.43	57.792	DOWN	AT5G06860.1	polygalacturonase inhibiting protein 1
contig19560	18.5794	24.5002	57.6957	16.2367	DOWN	AT4G23760.1	Cox19-like CHCH family protein
contig19601	25.0265	18.7444	49.1667	16.4665	DOWN	AT5G03380.1	Heavy metal transport/detoxification superfamily protein
contig19670	53.1821	78.1056	164.43	69.2816	DOWN
contig19678	11.1074	13.9194	25.5595	1.69788	DOWN	AT4G35160.1	O-methyltransferase family protein
contig19696	17.9526	23.8447	25.1368	10.0019	DOWN	AT2G45980.1	unknown protein; FUNCTIONS IN: molecular_function unknown; INVOLVED IN: biological_process unknown; LOCATED IN: cellular_component unknown; EXPRESSED IN: 25 plant structures; EXPRESSED DURING: 15 growth stages; BEST Arabidopsis thaliana protein match is: unknown protein (TAIR:AT4G00355.2); Has 93 Blast hits to 90 proteins in 15 species: Archae - 0; Bacteria - 0; Metazoa - 0; Fungi - 0; Plants - 9…
contig19740	31.6035	36.0037	43.1662	11.1401	DOWN	AT4G26830.1	O-Glycosyl hydrolases family 17 protein
contig19809	17.5462	28.4866	34.4829	11.1371	DOWN
contig19828	16.0333	14.1269	28.0535	9.6848	DOWN	AT1G18970.1	germin-like protein 4
contig19904	27.9759	37.3551	21.3725	6.01572	DOWN	AT1G21270.1	wall-associated kinase 2
contig20013	11.7371	17.5272	40.8406	15.4988	DOWN	AT5G17420.1	Cellulose synthase family protein
contig20164	10.6694	15.9243	25.3477	9.1407	DOWN	AT3G55410.1	2-oxoglutarate dehydrogenase E1 component
contig20219	13.4889	10.1889	27.9233	8.95618	DOWN	AT5G47060.1	Protein of unknown function (DUF581)
contig20241	17.3057	19.4862	20.3269	6.14549	DOWN	AT5G25880.1	NADP-malic enzyme 3
contig20476	37.9287	53.6126	65.1636	26.7267	DOWN	AT4G25030.1	unknown protein; BEST Arabidopsis thaliana protein match is: unknown protein (TAIR:AT5G45410.3); Has 125 Blast hits to 125 proteins in 36 species: Archae - 2; Bacteria - 31; Metazoa - 0; Fungi - 4; Plants - 88; Viruses - 0; Other Eukaryotes - 0 (source: NCBI BLink).
contig20545	12.7072	16.9548	24.3798	5.46778	DOWN	AT5G45650.1	subtilase family protein
contig20563	42.2974	64.0217	72.4049	30.2703	DOWN	AT3G42170.1	BED zinc finger ;hAT family dimerisation domain
contig2061	67.3356	84.433	112.065	36.1007	DOWN	AT1G60420.1	DC1 domain-containing protein
contig20654	32.0999	20.5716	42.5477	9.29292	DOWN	AT5G64510.1	unknown protein; FUNCTIONS IN: molecular_function unknown; INVOLVED IN: biological_process unknown; LOCATED IN: endomembrane system; EXPRESSED IN: 17 plant structures; EXPRESSED DURING: 10 growth stages; Has 35333 Blast hits to 34131 proteins in 2444 species: Archae - 798; Bacteria - 22429; Metazoa - 974; Fungi - 991; Plants - 531; Viruses - 0; Other Eukaryotes - 9610 (source: NCBI BLink).
contig208	11.7545	15.0094	20.3549	7.11809	DOWN
contig20808	17.2887	14.128	53.8224	21.7447	DOWN	AT1G72280.1	endoplasmic reticulum oxidoreductins 1
contig20811	13.7933	20.9277	72.5687	14.4575	DOWN
contig20823	40.6026	61.6145	149.433	55.465	DOWN	AT2G40890.1	cytochrome P450 family 98 subfamily A polypeptide 3
contig20824	18.9413	13.8421	39.3667	4.2966	DOWN
contig20895	41.2195	48.2921	77.5679	31.1888	DOWN	AT4G31480.1	Coatomer beta subunit
contig21070	19.0166	23.9968	24.5565	4.1054	DOWN	AT5G06860.1	polygalacturonase inhibiting protein 1
contig21176	13.5289	20.0078	24.5001	8.63302	DOWN	AT1G55120.1	beta-fructofuranosidase 5
contig21563	11.4803	16.0784	22.9883	8.30877	DOWN	AT1G59750.1	auxin response factor 1
contig21569	18.1	12.6446	59.6402	4.87544	DOWN	AT3G47420.1	phosphate starvation-induced gene 3
contig2184	22.811	30.4536	55.6722	18.7506	DOWN	AT1G07510.1	FTSH protease 10
contig21917	26.5425	29.0987	86.7126	18.7166	DOWN
contig21949	18.48	21.6306	31.4181	8.08759	DOWN	AT3G57270.1	beta-1 3-glucanase 1
contig21992	10.7628	13.2259	22.248	6.97157	DOWN	AT1G03250.2	unknown protein; FUNCTIONS IN: molecular_function unknown; INVOLVED IN: biological_process unknown; LOCATED IN: cellular_component unknown; EXPRESSED IN: 24 plant structures; EXPRESSED DURING: 15 growth stages.
contig22126	12.5925	20.7024	31.0692	11.8845	DOWN	AT5G47910.1	respiratory burst oxidase homologue D
contig22175	17.5512	29.1617	39.5582	15.2806	DOWN	AT2G30110.1	ubiquitin-activating enzyme 1
contig22217	5.22662	6.93379	29.2975	9.27693	DOWN	AT1G01720.1	NAC (No Apical Meristem) domain transcriptional regulator superfamily protein
contig2227	44.1469	73.0289	94.7646	35.9882	DOWN	AT5G24090.1	chitinase A
contig22334	79.1562	107.106	175.17	70.0625	DOWN	AT1G09430.1	ATP-citrate lyase A-3
contig22335	82.8877	104.528	170.847	72.0396	DOWN	AT1G09430.1	ATP-citrate lyase A-3
contig2261	23.9166	16.2919	51.3103	8.99086	DOWN	AT4G25790.1	CAP (Cysteine-rich secretory proteins Antigen 5 and Pathogenesis-related 1 protein) superfamily protein
contig22617	30.3221	36.772	48.0418	17.746	DOWN
contig22696	28.187	40.2367	52.7502	20.4956	DOWN	AT4G31490.1	Coatomer beta subunit
contig22729	22.8118	30.0126	40.5532	15.3759	DOWN	AT3G49680.1	branched-chain aminotransferase 3
contig22754	12.8806	14.6826	28.2778	9.77817	DOWN
contig22860	32.2058	42.5355	69.0919	28.2774	DOWN	AT4G32410.1	cellulose synthase 1
contig22991	64.6138	83.8305	129.465	44.7668	DOWN	AT1G53500.1	NAD-dependent epimerase/dehydratase family protein
contig22992	34.5513	50.701	65.7471	25.5657	DOWN	AT1G78570.1	rhamnose biosynthesis 1
contig2303	19.8346	25.8475	30.9049	11.8036	DOWN
contig2305	99.3468	65.2905	358.871	30.5356	DOWN
contig2330	19.0532	25.1196	31.9963	12.8129	DOWN
contig23346	14.6723	17.7381	26.0754	10.5637	DOWN	AT5G10490.1	MSCS-like 2
contig23370	2.55774	4.35311	30.0179	4.39319	DOWN	AT1G72360.2	Integrase-type DNA-binding superfamily protein
contig23497	4.10494	6.6176	25.6366	9.50033	DOWN	AT2G42280.1	basic helix-loop-helix (bHLH) DNA-binding superfamily protein
contig23532	60.7246	39.6341	72.8652	16.0101	DOWN	AT5G08290.1	mRNA splicing factor thioredoxin-like U5 snRNP
contig2361	70.6045	82.5806	179.968	59.3255	DOWN	AT1G19180.1	jasmonate-zim-domain protein 1
contig23628	28.5949	33.342	44.6328	18.3718	DOWN	AT3G14690.1	cytochrome P450 family 72 subfamily A polypeptide 15
contig23643	35.094	41.928	60.1338	18.6676	DOWN	AT4G25030.1	unknown protein; BEST Arabidopsis thaliana protein match is: unknown protein (TAIR:AT5G45410.3); Has 125 Blast hits to 125 proteins in 36 species: Archae - 2; Bacteria - 31; Metazoa - 0; Fungi - 4; Plants - 88; Viruses - 0; Other Eukaryotes - 0 (source: NCBI BLink).
contig2370	17.6904	21.5904	36.3204	14.6126	DOWN	AT2G17200.1	ubiquitin family protein
contig24139	37.2279	57.1306	84.0043	30.0897	DOWN	AT3G28715.1	ATPase V0/A0 complex subunit C/D
contig24325	11.8176	16.5981	38.8139	12.8415	DOWN	AT2G43710.2	Plant stearoyl-acyl-carrier-protein desaturase family protein
contig24363	15.2523	14.7833	25.1696	8.37637	DOWN	AT5G53420.1	CCT motif family protein
contig24511	23.9887	30.087	56.0382	11.3531	DOWN	AT2G15220.1	Plant basic secretory protein (BSP) family protein
contig24522	12.3876	19.5587	34.9395	11.6353	DOWN
contig24554	0.00694164	0.00646592	39.829	12.7936	DOWN	AT1G75280.1	NmrA-like negative transcriptional regulator family protein
contig24575	13.0721	16.3747	22.9228	6.65046	DOWN	AT4G00960.1	Protein kinase superfamily protein
contig2461	117.372	191.983	261.302	101.079	DOWN	AT2G05710.1	aconitase 3
contig24666	25.7147	30.7539	43.96	9.34166	DOWN
contig24749	9.73878	12.835	20.8681	8.80697	DOWN	AT1G80070.1	Pre-mRNA-processing-splicing factor
contig24794	16.5279	19.5318	65.9808	24.7139	DOWN	AT2G25940.1	alpha-vacuolar processing enzyme
contig24830	6.3433	5.0923	116.299	28.8145	DOWN	AT4G10270.1	Wound-responsive family protein
contig249	23.4586	27.8336	47.7958	8.46902	DOWN	AT1G71830.1	somatic embryogenesis receptor-like kinase 1
contig24917	14.8502	15.9456	22.6001	8.49431	DOWN	AT1G43190.1	polypyrimidine tract-binding protein 3
contig25024	34.4238	31.8769	55.1677	21.0329	DOWN	AT3G01420.1	Peroxidase superfamily protein
contig25039	15.7658	20.4867	37.7731	10.0105	DOWN
contig25123	18.9524	18.3545	22.1526	9.04725	DOWN	AT5G12180.1	calcium-dependent protein kinase 17
contig25125	7.25314	9.94136	31.3066	12.6677	DOWN	AT4G17940.1	Tetratricopeptide repeat (TPR)-like superfamily protein
contig25146	14.5301	6.89809	20.5038	6.77151	DOWN	AT5G51440.1	HSP20-like chaperones superfamily protein
contig25214	20.007	12.2747	21.4173	5.7281	DOWN	AT3G54700.1	phosphate transporter 1;7
contig2559	12.5503	13.8493	21.4609	7.78514	DOWN	AT5G35690.1	CONTAINS InterPro DOMAIN/s: WLM (InterPro:IPR013536) PUB domain (InterPro:IPR018997) PUG domain (InterPro:IPR006567); BEST Arabidopsis thaliana protein match is: zinc ion binding (TAIR:AT1G55915.1); Has 30201 Blast hits to 17322 proteins in 780 species: Archae - 12; Bacteria - 1396; Metazoa - 17338; Fungi - 3422; Plants - 5037; Viruses - 0; Other Eukaryotes - 2996 (source: NCBI BLink).
contig25811	15.1925	19.6002	25.1782	9.2166	DOWN	AT1G69800.2	Cystathionine beta-synthase (CBS) protein
contig25836	5.3479	7.84149	20.893	8.29506	DOWN	AT1G13700.1	6-phosphogluconolactonase 1
contig25870	20.3	31.8216	25.5701	8.89556	DOWN	AT4G33950.1	Protein kinase superfamily protein
contig25974	33.348	29.2319	48.5588	17.3838	DOWN
contig26000	44.8679	49.7152	62.4419	25.7046	DOWN	AT3G57260.1	beta-1 3-glucanase 2
contig26032	42.532	66.861	97.7801	18.012	DOWN
contig26055	11.1321	5.89839	42.4738	7.40804	DOWN
contig26331	13.666	11.6095	34.2153	7.70764	DOWN	AT3G53990.1	Adenine nucleotide alpha hydrolases-like superfamily protein
contig26332	19.1867	10.8065	33.3587	12.5311	DOWN
contig26394	13.8202	19.3015	53.1796	21.9374	DOWN	AT2G35680.1	Phosphotyrosine protein phosphatases superfamily protein
contig26424	31.5934	27.763	73.9097	18.9859	DOWN	AT1G11530.1	C-terminal cysteine residue is changed to a serine 1
contig2649	31.1554	44.3437	64.8524	26.7222	DOWN	AT5G06460.1	ubiquitin activating enzyme 2
contig2654	35.262	57.4885	95.2724	33.0235	DOWN	AT1G76550.1	Phosphofructokinase family protein
contig26963	39.3746	52.1312	46.2517	16.721	DOWN	AT3G09270.1	glutathione S-transferase TAU 8
contig27032	12.066	13.2141	20.2753	7.75874	DOWN	AT5G03540.3	exocyst subunit exo70 family protein A1
contig27058	15.8134	13.8549	21.1244	7.49756	DOWN	AT5G60600.1	4-hydroxy-3-methylbut-2-enyl diphosphate synthase
contig27137	38.5831	55.5135	74.2761	30.8066	DOWN
contig27184	16.6711	21.9139	32.5873	12.9979	DOWN	AT1G53310.1	phosphoenolpyruvate carboxylase 1
contig27203	57.5378	86.4792	75.9257	21.1661	DOWN	AT5G55180.2	O-Glycosyl hydrolases family 17 protein
contig27205	11.121	15.9023	30.043	10.1007	DOWN
contig27293	26.4454	31.573	42.631	12.3088	DOWN	AT3G06170.1	Serinc-domain containing serine and sphingolipid biosynthesis protein
contig27377	34.3218	30.3308	26.6544	7.32244	DOWN
contig27379	25.4783	34.4129	41.7935	17.0523	DOWN	AT4G35160.1	O-methyltransferase family protein
contig27518	12.9382	15.8605	58.4798	24.093	DOWN	AT5G05340.1	Peroxidase superfamily protein
contig27593	18.6286	23.3187	24.754	9.34262	DOWN	AT2G38870.1	Serine protease inhibitor potato inhibitor I-type family protein
contig27857	31.0143	33.0728	79.1522	29.4835	DOWN	AT4G24730.1	Calcineurin-like metallo-phosphoesterase superfamily protein
contig2791	68.601	81.4037	92.3803	37.595	DOWN	AT2G42490.1	Copper amine oxidase family protein
contig27966	55.8258	58.5028	55.6656	20.5755	DOWN	AT1G51880.1	root hair specific 6
contig2797	25.8889	41.3663	42.4452	14.1432	DOWN	AT5G53160.2	regulatory components of ABA receptor 3
contig28035	23.024	33.949	46.6684	16.7588	DOWN
contig2808	140.583	138.068	149.39	62.4787	DOWN	AT1G71695.1	Peroxidase superfamily protein
contig2809	122.716	109.177	94.8099	34.0003	DOWN	AT1G71695.1	Peroxidase superfamily protein
contig2812	13.7439	20.7734	29.0294	10.4486	DOWN	AT1G49050.1	Eukaryotic aspartyl protease family protein
contig2813	123.324	179.1	255.62	72.653	DOWN	AT1G49050.1	Eukaryotic aspartyl protease family protein
contig2819	90.6405	130.892	175.995	57.2	DOWN	AT3G27090.1	DCD (Development and Cell Death) domain protein
contig28206	9.99388	15.6035	24.2848	9.88817	DOWN
contig28223	9.94047	14.9526	22.6902	5.16619	DOWN
contig28342	18.7318	25.9002	34.1026	12.4061	DOWN	AT2G23620.1	methyl esterase 1
contig2838	35.3508	59.0028	85.1978	26.9196	DOWN	AT4G35160.1	O-methyltransferase family protein
contig28452	155.317	68.8808	138.959	36.9357	DOWN	AT5G56010.1	heat shock protein 81-3
contig28593	22.8197	29.9036	38.4888	6.39022	DOWN	AT3G21340.1	Leucine-rich repeat protein kinase family protein
contig28713	33.5396	44.1951	66.7495	22.1579	DOWN	AT3G07560.1	peroxin 13
contig28723	27.7148	39.7167	53.4081	21.2451	DOWN	AT1G15130.1	Endosomal targeting BRO1-like domain-containing protein
contig28724	28.8967	39.6076	59.3148	23.8967	DOWN	AT1G15130.1	Endosomal targeting BRO1-like domain-containing protein
contig28732	14.9661	21.1543	30.0316	11.4074	DOWN	AT2G03800.1	D-aminoacyl-tRNA deacylases
contig2877	14.8216	10.6496	34.3979	9.3328	DOWN	AT4G11650.1	osmotin 34
contig28778	8.73539	10.991	21.32	7.94126	DOWN	AT1G71360.1	Galactose-binding protein
contig28923	66.2381	74.6712	81.8725	15.7086	DOWN	AT2G02990.1	ribonuclease 1
contig29093	24.8441	38.5241	46.4592	13.1731	DOWN	AT5G61070.1	histone deacetylase of the RPD3/HDA1 superfamily 18
contig2919	268.342	442.727	852.144	144.632	DOWN	AT1G13440.1	glyceraldehyde-3-phosphate dehydrogenase C2
contig29260	7.03668	10.7224	22.2062	7.61413	DOWN	AT5G17060.1	ADP-ribosylation factor B1B
contig29332	20.3654	26.5956	40.5764	7.88565	DOWN	AT5G02090.1	unknown protein; Has 30 Blast hits to 30 proteins in 10 species: Archae - 0; Bacteria - 0; Metazoa - 0; Fungi - 0; Plants - 30; Viruses - 0; Other Eukaryotes - 0 (source: NCBI BLink).
contig29342	22.0156	9.72958	91.6136	27.0569	DOWN
contig29480	17.3499	21.787	30.9811	10.8388	DOWN	AT1G59750.1	auxin response factor 1
contig2951	33.5373	20.3814	60.3129	12.4364	DOWN	AT3G02040.1	senescence-related gene 3
contig29604	83.4825	106.078	146.03	32.6922	DOWN	AT5G19890.1	Peroxidase superfamily protein
contig29824	19.7861	33.4252	36.4411	10.9161	DOWN	AT1G14870.1	PLANT CADMIUM RESISTANCE 2
contig30000	27.2452	14.4513	52.5842	14.0458	DOWN	AT5G51890.1	Peroxidase superfamily protein
contig30270	10.5215	16.0722	24.4638	9.10343	DOWN	AT5G13140.1	Pollen Ole e 1 allergen and extensin family protein
contig30292	20.048	20.8698	32.2981	13.2923	DOWN	AT1G64940.1	cytochrome P450 family 87 subfamily A polypeptide 6
contig30328	13.7973	21.2328	30.5667	9.13129	DOWN	AT1G26830.1	cullin 3
contig30406	57.034	70.5971	56.5017	22.4837	DOWN
contig30462	31.108	33.2027	59.8874	23.5126	DOWN	AT4G34450.1	coatomer gamma-2 subunit putative / gamma-2 coat protein putative / gamma-2 COP putative
contig3061	28.9196	22.6252	70.7877	17.7126	DOWN	AT1G44800.1	nodulin MtN21 /EamA-like transporter family protein
contig30673	6.71804	4.08461	24.0029	4.52721	DOWN	AT5G42650.1	allene oxide synthase
contig3069	34.4254	51.3611	47.6292	19.3136	DOWN	AT1G10360.1	glutathione S-transferase TAU 18
contig30734	8.42962	11.2062	27.4626	11.1657	DOWN
contig3085	16.0982	13.8775	27.0364	10.9495	DOWN	AT5G45410.1	unknown protein; BEST Arabidopsis thaliana protein match is: unknown protein (TAIR:AT4G25030.2); Has 124 Blast hits to 124 proteins in 34 species: Archae - 2; Bacteria - 31; Metazoa - 0; Fungi - 0; Plants - 91; Viruses - 0; Other Eukaryotes - 0 (source: NCBI BLink).
contig31236	20.4576	10.8963	25.1578	4.8337	DOWN	AT4G21680.1	NITRATE TRANSPORTER 1.8
contig3127	319.042	390.367	302.552	105.178	DOWN	AT1G71695.1	Peroxidase superfamily protein
contig31730	54.7381	51.9737	64.5972	19.9403	DOWN	AT5G05440.1	Polyketide cyclase/dehydrase and lipid transport superfamily protein
contig3180	83.336	95.2031	121.65	44.6268	DOWN	AT1G56070.1	Ribosomal protein S5/Elongation factor G/III/V family protein
contig32262	11.5576	16.2751	21.9623	7.55617	DOWN	AT4G11900.1	S-locus lectin protein kinase family protein
contig32274	13.2074	18.6684	28.9942	11.7976	DOWN	AT5G22300.1	nitrilase 4
contig32546	11.9965	17.4463	75.8956	26.8274	DOWN	AT3G28490.1	Oxoglutarate/iron-dependent oxygenase
contig32631	22.7619	12.878	33.7288	13.2018	DOWN
contig3272	43.914	60.5796	99.89	35.427	DOWN	AT1G17290.1	alanine aminotransferas
contig32782	13.6675	20.393	28.5668	5.76411	DOWN	AT4G30170.1	Peroxidase family protein
contig32879	18.2399	12.9295	20.02	7.40324	DOWN	AT3G09270.1	glutathione S-transferase TAU 8
contig3307	14.7387	15.4505	21.3663	6.52343	DOWN	AT3G50950.2	HOPZ-ACTIVATED RESISTANCE 1
contig33088	19.5469	9.61415	40.3166	12.7928	DOWN	AT3G09390.1	metallothionein 2A
contig33131	51.1175	65.3675	88.2385	33.7412	DOWN	AT2G40290.1	Eukaryotic translation initiation factor 2 subunit 1
contig33136	52.2713	86.2269	131.104	25.8225	DOWN	AT3G55440.1	triosephosphate isomerase
contig3327	40.4762	62.238	85.5533	30.8115	DOWN	AT2G17200.1	ubiquitin family protein
contig3328	39.5744	65.9609	85.1843	25.7145	DOWN	AT2G17200.1	ubiquitin family protein
contig33324	20.9851	28.9283	38.984	13.5822	DOWN	AT4G29010.1	Enoyl-CoA hydratase/isomerase family
contig33369	18.1571	22.6831	28.3985	9.13117	DOWN	AT3G06170.1	Serinc-domain containing serine and sphingolipid biosynthesis protein
contig3341	53.4081	69.7432	148.439	50.0013	DOWN	AT5G08570.1	Pyruvate kinase family protein
contig33455	50.414	61.2043	46.4136	18.2873	DOWN	AT4G21860.1	methionine sulfoxide reductase B 2
contig33466	23.6767	29.7409	29.6619	11.6899	DOWN	AT4G29990.1	Leucine-rich repeat transmembrane protein kinase protein
contig33478	21.1407	31.7677	34.2784	13.4478	DOWN	AT2G24360.1	Protein kinase superfamily protein
contig3373	22.4451	25.9509	38.123	15.3561	DOWN	AT1G34750.1	Protein phosphatase 2C family protein
contig3380	82.7462	117.009	173.628	72.5453	DOWN	AT2G44350.2	Citrate synthase family protein
contig33807	35.3391	40.9479	52.5559	8.59591	DOWN	AT1G17710.1	Pyridoxal phosphate phosphatase-related protein
contig34217	12.1962	7.87726	20.657	7.95258	DOWN	AT3G48660.1	Protein of unknown function (DUF 3339)
contig3430	15.623	24.7903	226.984	63.111	DOWN	AT5G27760.1	Hypoxia-responsive family protein
contig34352	24.0712	20.8558	36.645	12.5022	DOWN	AT1G72330.3	alanine aminotransferase 2
contig34363	24.4438	30.3137	41.5966	16.8586	DOWN	AT1G73680.2	alpha dioxygenase
contig3455	32.9464	27.0068	70.8462	16.5704	DOWN	AT5G51890.1	Peroxidase superfamily protein
contig34648	17.4701	28.0642	23.6777	6.91636	DOWN
contig3475	97.3945	122.477	218.238	69.994	DOWN	AT2G36460.1	Aldolase superfamily protein
contig34756	13.3725	16.0945	24.5214	8.84023	DOWN	AT5G35690.1	CONTAINS InterPro DOMAIN/s: WLM (InterPro:IPR013536) PUB domain (InterPro:IPR018997) PUG domain (InterPro:IPR006567); BEST Arabidopsis thaliana protein match is: zinc ion binding (TAIR:AT1G55915.1); Has 30201 Blast hits to 17322 proteins in 780 species: Archae - 12; Bacteria - 1396; Metazoa - 17338; Fungi - 3422; Plants - 5037; Viruses - 0; Other Eukaryotes - 2996 (source: NCBI BLink).
contig34766	240.604	384.895	358.056	103.721	DOWN	AT4G33720.1	CAP (Cysteine-rich secretory proteins Antigen 5 and Pathogenesis-related 1 protein) superfamily protein
contig3477	35.4304	50.4596	75.1145	29.2546	DOWN	AT5G06460.1	ubiquitin activating enzyme 2
contig34849	10.7181	18.0776	24.8658	8.94486	DOWN	AT3G14940.1	phosphoenolpyruvate carboxylase 3
contig34874	18.3124	23.3129	34.6732	12.7804	DOWN	AT5G47390.1	myb-like transcription factor family protein
contig34977	22.4958	14.4828	36.5965	15.2568	DOWN
contig35	15.7418	21.9337	38.9154	13.3134	DOWN	AT3G47730.1	ATP-binding cassette A2
contig35015	21.6872	22.1073	28.3905	9.65117	DOWN	AT1G79000.2	histone acetyltransferase of the CBP family 1
contig35148	9.87474	15.7213	23.8184	9.43103	DOWN	AT3G24503.1	aldehyde dehydrogenase 2C4
contig35352	10.8166	13.525	24.1268	6.56882	DOWN	AT5G23450.3	long-chain base (LCB) kinase 1
contig35362	21.0755	16.9329	39.8889	12.9546	DOWN
contig3545	13.4438	18.5466	28.4196	11.1803	DOWN	AT5G48020.1	2-oxoglutarate (2OG) and Fe(II)-dependent oxygenase superfamily protein
contig35696	23.4704	37.5026	78.3891	21.2276	DOWN	AT5G48485.1	Bifunctional inhibitor/lipid-transfer protein/seed storage 2S albumin superfamily protein
contig35793	23.0085	25.8608	60.978	22.5343	DOWN	AT4G32690.1	hemoglobin 3
contig35908	26.4316	23.189	31.0739	11.3722	DOWN	AT4G39730.1	Lipase/lipooxygenase PLAT/LH2 family protein
contig3625	709.716	1031.09	1021.99	402.645	DOWN	AT2G14610.1	pathogenesis-related gene 1
contig3626	350.424	456.313	490.234	186.748	DOWN	AT4G33720.1	CAP (Cysteine-rich secretory proteins Antigen 5 and Pathogenesis-related 1 protein) superfamily protein
contig36580	10.6385	16.4536	23.7851	6.23706	DOWN
contig366	99.0349	126.276	151.384	55.2794	DOWN	AT2G43590.1	Chitinase family protein
contig3669	13.8454	19.05	23.9509	9.24127	DOWN	AT4G35800.1	RNA polymerase II large subunit
contig36734	15.5754	20.7053	30.6795	8.10338	DOWN	AT3G04350.1	Plant protein of unknown function (DUF946)
contig36848	15.2275	20.5132	21.9375	7.69416	DOWN	AT1G07530.1	SCARECROW-like 14
contig36867	21.1896	31.6095	39.8256	10.3674	DOWN	AT5G59450.1	GRAS family transcription factor
contig36906	19.2739	31.9649	38.375	12.5853	DOWN	AT1G71980.1	Protease-associated (PA) RING/U-box zinc finger family protein
contig3707	13.8568	16.4878	31.8234	11.2138	DOWN	AT1G07510.1	FTSH protease 10
contig37153	9.88273	12.2833	41.5602	16.5889	DOWN
contig3718	63.8402	87.9933	116.915	44.6197	DOWN	AT5G08530.1	51 kDa subunit of complex I
contig37225	15.0208	15.3535	37.997	10.4689	DOWN	AT5G05340.1	Peroxidase superfamily protein
contig37333	17.3476	15.6244	23.7393	9.10742	DOWN	AT2G40740.1	WRKY DNA-binding protein 55
contig37369	14.9347	14.0747	23.6001	7.55534	DOWN	AT1G28050.1	B-box type zinc finger protein with CCT domain
contig37394	3.04068	1.65038	81.013	10.6467	DOWN	AT4G10265.1	Wound-responsive family protein
contig37983	16.6369	7.88287	29.831	10.1719	DOWN	AT1G21890.1	nodulin MtN21 /EamA-like transporter family protein
contig38084	47.9416	41.5445	47.1647	17.4329	DOWN	AT5G54680.1	basic helix-loop-helix (bHLH) DNA-binding superfamily protein
contig38088	26.7426	44.8878	57.2378	16.3721	DOWN	AT1G68300.1	Adenine nucleotide alpha hydrolases-like superfamily protein
contig38237	12.4102	20.8939	28.8434	8.9087	DOWN	AT5G22300.1	nitrilase 4
contig38274	37.8234	29.9985	44.0793	17.022	DOWN	AT2G02250.1	phloem protein 2-B2
contig3844	50.9021	62.6916	85.8282	36.1113	DOWN	AT3G53230.1	ATPase AAA-type CDC48 protein
contig38456	8.21337	13.2295	20.6967	5.56392	DOWN
contig38897	11.3298	14.9632	29.2087	9.30863	DOWN	AT5G40850.1	urophorphyrin methylase 1
contig38938	15.3518	23.2012	21.8931	8.44101	DOWN	AT2G15230.1	lipase 1
contig39208	8.39856	13.3241	20.0849	8.01962	DOWN
contig39297	10.3943	15.591	24.273	7.20992	DOWN	AT2G25280.1	CONTAINS InterPro DOMAIN/s: UPF0103/Mediator of ErbB2-driven cell motility (Memo) related (InterPro:IPR002737); Has 1074 Blast hits to 1072 proteins in 474 species: Archae - 213; Bacteria - 366; Metazoa - 159; Fungi - 135; Plants - 54; Viruses - 0; Other Eukaryotes - 147 (source: NCBI BLink).
contig39332	9.74506	13.6135	27.3343	4.55515	DOWN	AT2G16120.1	polyol/monosaccharide transporter 1
contig39592	38.1101	51.3709	63.0132	26.4372	DOWN	AT4G27070.1	tryptophan synthase beta-subunit 2
contig39629	21.9273	15.8639	20.2613	7.81974	DOWN	AT1G56300.1	Chaperone DnaJ-domain superfamily protein
contig39682	16.3567	26.4053	34.2685	12.2815	DOWN	AT5G49810.1	methionine S-methyltransferase
contig3974	20.1595	28.6153	39.7937	8.46192	DOWN	AT1G34210.1	somatic embryogenesis receptor-like kinase 2
contig3980	27.9837	22.1225	44.8648	12.9467	DOWN	AT4G11650.1	osmotin 34
contig39848	28.2952	35.5903	73.8715	27.8844	DOWN	AT1G11530.1	C-terminal cysteine residue is changed to a serine 1
contig39919	60.2492	75.167	166.218	64.8202	DOWN	AT4G12470.1	azelaic acid induced 1
contig3997	23.3823	34.0823	30.3906	11.2919	DOWN	AT3G47340.1	glutamine-dependent asparagine synthase 1
contig3998	63.6925	87.4483	58.7904	22.7944	DOWN	AT3G47340.1	glutamine-dependent asparagine synthase 1
contig40019	8.0564	11.9499	48.3716	11.5286	DOWN	AT5G08790.1	NAC (No Apical Meristem) domain transcriptional regulator superfamily protein
contig40249	22.7962	24.7781	20.4827	8.39967	DOWN	AT1G55020.1	lipoxygenase 1
contig4025	53.3106	81.9324	84.9728	33.8773	DOWN	AT5G09810.1	actin 7
contig4054	13.8458	9.38822	98.1337	13.4342	DOWN	AT3G02550.1	LOB domain-containing protein 41
contig40745	41.739	60.1004	90.9966	31.0891	DOWN	AT5G50200.3	nitrate transmembrane transporters
contig4078	417.996	519.19	661.78	277.484	DOWN	AT5G60390.1	GTP binding Elongation factor Tu family protein
contig40817	10.0363	13.0355	22.8047	8.57751	DOWN	AT2G35680.1	Phosphotyrosine protein phosphatases superfamily protein
contig41033	54.6517	81.826	87.2341	30.7141	DOWN	AT1G56410.1	heat shock protein 70 (Hsp 70) family protein
contig41184	12.8021	14.7153	29.78	5.50244	DOWN	AT2G02320.1	phloem protein 2-B7
contig41537	2.75993	2.1895	104.913	13.3452	DOWN	AT4G10270.1	Wound-responsive family protein
contig4160	10.1255	12.2979	26.57	11.0295	DOWN	AT2G04350.1	AMP-dependent synthetase and ligase family protein
contig4202	555.555	565.641	997.865	265.008	DOWN	AT3G04120.1	glyceraldehyde-3-phosphate dehydrogenase C subunit 1
contig42233	8.93917	9.44388	24.9672	3.13085	DOWN	AT1G77330.1	2-oxoglutarate (2OG) and Fe(II)-dependent oxygenase superfamily protein
contig423	14.6433	12.682	21.6723	8.35384	DOWN	AT4G34350.1	4-hydroxy-3-methylbut-2-enyl diphosphate reductase
contig4257	131.459	118.521	101.846	41.27	DOWN	AT1G22770.1	gigantea protein (GI)
contig4258	50.4626	58.7427	51.3429	16.5169	DOWN	AT1G22770.1	gigantea protein (GI)
contig42647	18.9955	18.3405	31.061	9.3512	DOWN	AT2G18800.1	xyloglucan endotransglucosylase/hydrolase 21
contig42786	13.3283	16.2	27.1294	9.87431	DOWN	AT4G17500.1	ethylene responsive element binding factor 1
contig42907	35.7683	49.922	59.0948	19.7188	DOWN
contig43065	8.31085	10.916	20.6836	8.67077	DOWN	AT4G14580.1	CBL-interacting protein kinase 4
contig43136	17.1386	16.0335	22.2232	6.02225	DOWN	AT1G25550.1	myb-like transcription factor family protein
contig43149	22.4633	13.1969	28.6577	10.9457	DOWN	AT3G04120.1	glyceraldehyde-3-phosphate dehydrogenase C subunit 1
contig4316	39.1474	44.6652	81.9048	25.1672	DOWN	AT3G48300.1	cytochrome P450 family 71 subfamily A polypeptide 23
contig4327	28.1815	45.0059	44.425	13.3248	DOWN	AT4G16260.1	Glycosyl hydrolase superfamily protein
contig43446	15.7011	17.2534	26.271	9.03046	DOWN	AT1G67030.1	zinc finger protein 6
contig43457	6.60501	8.97843	20.4989	5.2045	DOWN	AT1G64530.1	Plant regulator RWP-RK family protein
contig43727	6.37296	10.0856	25.7117	0.669235	DOWN
contig4375	155.214	238.331	483.978	91.5849	DOWN	AT5G39150.1	RmlC-like cupins superfamily protein
contig43878	4.14354	5.42437	22.0292	3.29385	DOWN	AT5G63790.1	NAC domain containing protein 102
contig43994	16.6223	15.1209	26.2421	9.95629	DOWN	AT1G07530.1	SCARECROW-like 14
contig441	20.985	14.4019	26.6285	4.56967	DOWN	AT2G45910.1	U-box domain-containing protein kinase family protein
contig44164	9.5583	4.01574	33.1171	5.07298	DOWN
contig44231	60.5554	57.771	125.617	32.6294	DOWN
contig4432	37.8162	59.9384	93.4539	23.8906	DOWN	AT5G03340.1	ATPase AAA-type CDC48 protein
contig4433	39.9428	66.1352	100.454	25.3124	DOWN	AT5G03340.1	ATPase AAA-type CDC48 protein
contig4457	222.852	228.481	331.937	137.866	DOWN	AT5G56010.1	heat shock protein 81-3
contig44765	60.7983	28.0834	64.3115	17.7686	DOWN	AT3G46230.1	heat shock protein 17.4
contig4487	107.166	148.094	160.484	63.7539	DOWN	AT1G60420.1	DC1 domain-containing protein
contig4488	24.4604	31.4951	47.1803	12.6903	DOWN	AT5G09810.1	actin 7
contig4489	59.6625	63.8705	84.4354	32.1014	DOWN	AT5G09810.1	actin 7
contig4523	9.48759	10.6522	34.3811	6.23896	DOWN	AT3G01470.1	homeobox 1
contig45341	7.96599	12.6364	21.6141	4.46299	DOWN	AT4G17500.1	ethylene responsive element binding factor 1
contig45349	1.64636	2.13063	31.8646	5.25227	DOWN	AT3G10040.1	sequence-specific DNA binding transcription factors
contig45513	38.2741	32.7238	44.8089	16.2523	DOWN	AT3G57240.1	beta-1 3-glucanase 3
contig45654	7.75597	5.21378	49.0849	8.11446	DOWN	AT3G02550.1	LOB domain-containing protein 41
contig4586	15.734	18.647	38.6835	11.6253	DOWN	AT4G34610.1	BEL1-like homeodomain 6
contig46141	28.0869	42.1692	61.6631	23.8317	DOWN	AT3G28715.1	ATPase V0/A0 complex subunit C/D
contig4623	256.912	179.318	185.497	44.3039	DOWN	AT5G41080.1	PLC-like phosphodiesterases superfamily protein
contig46241	22.3971	27.1132	47.0595	18.382	DOWN	AT5G05440.1	Polyketide cyclase/dehydrase and lipid transport superfamily protein
contig46311	3.12414	3.03509	36.6972	11.1301	DOWN	AT4G10270.1	Wound-responsive family protein
contig465	11.1487	11.8372	24.7242	5.17196	DOWN	AT3G14690.1	cytochrome P450 family 72 subfamily A polypeptide 15
contig46605	74.6016	33.9901	28.0618	9.90443	DOWN
contig46616	19.5223	21.928	20.9327	7.68907	DOWN	AT3G04570.1	AT-hook motif nuclear-localized protein 19
contig46720	24.9467	15.1528	35.6434	14.6357	DOWN
contig46818	11.4958	9.44262	26.2333	7.62515	DOWN	AT2G15220.1	Plant basic secretory protein (BSP) family protein
contig47027	35.158	37.1987	34.9007	13.5665	DOWN
contig47311	15.6917	20.8215	29.9547	9.13879	DOWN	AT5G43150.1	unknown protein; FUNCTIONS IN: molecular_function unknown; INVOLVED IN: biological_process unknown; LOCATED IN: mitochondrion; EXPRESSED IN: 22 plant structures; EXPRESSED DURING: 13 growth stages; Has 1807 Blast hits to 1807 proteins in 277 species: Archae - 0; Bacteria - 0; Metazoa - 736; Fungi - 347; Plants - 385; Viruses - 0; Other Eukaryotes - 339 (source: NCBI BLink).
contig47349	13.8146	22.2014	26.2913	9.56232	DOWN	AT1G34340.1	alpha/beta-Hydrolases superfamily protein
contig47390	4.45166	5.3011	27.9962	7.22506	DOWN	AT1G10390.1	Nucleoporin autopeptidase
contig4775	58.589	34.6712	86.5995	18.7436	DOWN
contig47800	14.4565	7.34834	27.7233	6.10517	DOWN	AT2G39510.1	nodulin MtN21 /EamA-like transporter family protein
contig4788	38.1816	29.0227	82.5962	32.3492	DOWN	AT1G71695.1	Peroxidase superfamily protein
contig48320	31.2746	24.9846	39.5574	16.2223	DOWN
contig48377	2.98269	4.97979	25.945	5.13751	DOWN	AT5G45275.1	Major facilitator superfamily protein
contig48540	13.0986	13.5857	23.49	9.56031	DOWN	AT5G05140.1	Transcription elongation factor (TFIIS) family protein
contig48731	6.59021	10.3381	29.1874	2.85036	DOWN	AT2G26670.1	Plant haem oxygenase (decyclizing) family protein
contig49	31.0628	44.7106	58.4581	18.5041	DOWN	AT3G57260.1	beta-1 3-glucanase 2
contig49036	7.28673	6.72516	45.2345	11.6543	DOWN	AT4G32690.1	hemoglobin 3
contig49194	2.31813	2.57574	23.6782	2.56206	DOWN	AT5G47060.1	Protein of unknown function (DUF581)
contig4950	18.9265	19.673	28.1021	11.2877	DOWN	AT3G14690.1	cytochrome P450 family 72 subfamily A polypeptide 15
contig4973	19.6275	23.4279	28.0541	7.02865	DOWN	AT3G47090.1	Leucine-rich repeat protein kinase family protein
contig49736	14.0152	12.5376	25.0335	10.4358	DOWN	AT3G47160.2	RING/U-box superfamily protein
contig50	12.8443	7.71884	27.8296	7.86098	DOWN	AT3G04940.1	cysteine synthase D1
contig51116	68.1503	32.6046	76.4095	9.04894	DOWN	AT2G45130.1	SPX domain gene 3
contig51117	50.2646	36.79	118.071	7.95071	DOWN	AT2G26660.1	SPX domain gene 2
contig5119	94.0122	154.209	31.6362	12.8725	DOWN	AT5G39150.1	RmlC-like cupins superfamily protein
contig51213	28.9004	46.0096	67.2236	20.643	DOWN	AT1G02260.1	Divalent ion symporter
contig5142	100.403	108.443	93.0432	38.6189	DOWN	AT2G20420.1	ATP citrate lyase (ACL) family protein
contig51424	8.954	12.4256	28.7495	7.67729	DOWN	AT1G49850.1	RING/U-box superfamily protein
contig51602	3.05178	3.91861	23.3333	3.21674	DOWN	AT1G08090.1	nitrate transporter 2:1
contig5172	17.7446	23.7495	102.678	8.19595	DOWN
contig5173	57.9615	50.9113	217.912	18.411	DOWN
contig51901	4.7092	7.27475	94.6469	21.2024	DOWN	AT5G39890.1	Protein of unknown function (DUF1637)
contig5195	10.4989	15.9049	22.4791	7.14494	DOWN	AT1G13900.1	Purple acid phosphatases superfamily protein
contig52	30.5946	25.0686	36.4977	13.3824	DOWN	AT1G02260.1	Divalent ion symporter
contig52550	50.7916	70.8188	121.348	50.3812	DOWN
contig5267	23.3851	35.1293	34.7433	9.52722	DOWN	AT3G12500.1	basic chitinase
contig5272	12.2098	6.54397	23.8974	9.22726	DOWN	AT5G65660.1	hydroxyproline-rich glycoprotein family protein
contig5310	16.8431	27.2804	34.6949	9.72015	DOWN	AT2G16050.1	Cysteine/Histidine-rich C1 domain family protein
contig53230	3.56401	5.54243	20.9996	6.90004	DOWN	AT2G47710.1	Adenine nucleotide alpha hydrolases-like superfamily protein
contig53422	10.0635	14.4817	33.6367	13.35	DOWN	AT3G48140.1	B12D protein
contig53724	12.7397	15.255	25.8139	9.63871	DOWN	AT4G30080.1	auxin response factor 16
contig541	44.9052	73.6115	138.594	53.7928	DOWN	AT1G53910.1	related to AP2 12
contig543	68.0506	77.5198	82.6879	20.2534	DOWN	AT1G10360.1	glutathione S-transferase TAU 18
contig54316	13.0163	21.6046	30.0142	9.78707	DOWN	AT4G04920.1	sensitive to freezing 6
contig5438	88.3693	114.965	149.448	38.7193	DOWN	AT1G10370.1	Glutathione S-transferase family protein
contig54579	36.6412	28.2044	33.8795	13.6551	DOWN	AT3G07130.1	purple acid phosphatase 15
contig54676	34.0579	44.4936	59.4211	24.7697	DOWN	AT1G03610.1	Protein of unknown function (DUF789)
contig54843	13.7952	19.2065	30.1401	10.179	DOWN
contig5508	55.2393	45.2508	81.6192	30.2435	DOWN	AT5G02230.1	Haloacid dehalogenase-like hydrolase (HAD) superfamily protein
contig55959	6.78567	9.1107	21.4133	2.52297	DOWN	AT5G06740.1	Concanavalin A-like lectin protein kinase family protein
contig56128	9.54689	8.78541	23.8292	8.547	DOWN
contig56265	16.8341	19.1787	27.6363	7.44117	DOWN	AT4G27020.1	unknown protein; FUNCTIONS IN: molecular_function unknown; LOCATED IN: vacuole; BEST Arabidopsis thaliana protein match is: unknown protein (TAIR:AT5G54870.1); Has 1807 Blast hits to 1807 proteins in 277 species: Archae - 0; Bacteria - 0; Metazoa - 736; Fungi - 347; Plants - 385; Viruses - 0; Other Eukaryotes - 339 (source: NCBI BLink).
contig56324	7.95629	9.80537	27.6076	8.37458	DOWN	AT1G30040.1	gibberellin 2-oxidase
contig5667	17.6152	12.901	20.3428	7.11845	DOWN
contig56736	9.14853	5.80553	120.652	19.7529	DOWN	AT4G10265.1	Wound-responsive family protein
contig5687	61.7175	82.2956	102.683	27.9366	DOWN	AT1G56070.1	Ribosomal protein S5/Elongation factor G/III/V family protein
contig5702	31.9952	21.6344	45.7797	15.9094	DOWN	AT4G17670.1	Protein of unknown function (DUF581)
contig574	89.2154	141.409	271.02	71.5444	DOWN	AT1G72330.3	alanine aminotransferase 2
contig57664	8.93461	12.1587	22.0609	6.37813	DOWN
contig5767	8.13622	10.5731	20.4252	4.96693	DOWN	AT1G44800.1	nodulin MtN21 /EamA-like transporter family protein
contig5770	80.077	65.4001	103.676	17.2129	DOWN	AT5G20150.1	SPX domain gene 1
contig57860	8.23136	10.2512	23.3267	7.49587	DOWN	AT1G64530.1	Plant regulator RWP-RK family protein
contig57986	70.6136	104.561	77.1943	24.7689	DOWN	AT5G39160.1	RmlC-like cupins superfamily protein
contig5829	15.5331	22.0181	34.3138	14.0774	DOWN	AT5G05140.1	Transcription elongation factor (TFIIS) family protein
contig5869	29.2485	33.4524	54.8011	19.3103	DOWN	AT3G52190.1	phosphate transporter traffic facilitator1
contig58744	250.04	167.461	159.523	27.2096	DOWN	AT5G48485.1	Bifunctional inhibitor/lipid-transfer protein/seed storage 2S albumin superfamily protein
contig5878	149.781	186.601	217.959	83.0451	DOWN	AT5G11520.1	aspartate aminotransferase 3
contig5879	11.5361	15.1191	30.8198	8.25412	DOWN	AT4G35470.1	plant intracellular ras group-related LRR 4
contig5888	5.29293	5.27993	25.8262	6.79756	DOWN	AT5G17330.1	glutamate decarboxylase
contig5889	42.5143	46.1408	61.9667	21.8149	DOWN	AT4G25760.1	glutamine dumper 2
contig5895	605.2	797.308	1105.88	432.997	DOWN	AT1G56070.1	Ribosomal protein S5/Elongation factor G/III/V family protein
contig59179	8.08718	8.65979	26.7613	10.7155	DOWN
contig5938	10.6053	10.5486	23.3486	4.76972	DOWN	AT5G58380.1	SOS3-interacting protein 1
contig59607	14.1458	16.3624	21.3963	7.04315	DOWN	AT3G61060.2	phloem protein 2-A13
contig59624	10.6682	14.8889	22.8541	4.72844	DOWN	AT1G77330.1	2-oxoglutarate (2OG) and Fe(II)-dependent oxygenase superfamily protein
contig59995	20.0488	11.2107	24.37	6.25575	DOWN	AT4G09320.1	Nucleoside diphosphate kinase family protein
contig60655	74.5313	48.0212	63.8409	14.8994	DOWN
contig60715	6.32359	9.56605	26.7364	8.89985	DOWN	AT5G53560.1	cytochrome B5 isoform E
contig6074	54.1437	50.6517	109.525	29.2239	DOWN	AT5G06720.1	peroxidase 2
contig60789	11.2732	14.9078	33.5413	8.23462	DOWN	AT5G10930.1	CBL-interacting protein kinase 5
contig6085	41.7617	56.4936	166.338	55.165	DOWN	AT5G08570.1	Pyruvate kinase family protein
contig6134	10.1338	15.3724	20.0813	8.12059	DOWN	AT3G55990.1	Plant protein of unknown function (DUF828)
contig6142	14.8773	18.956	41.4969	11.8031	DOWN	AT3G47730.1	ATP-binding cassette A2
contig61451	7.61023	4.90761	118.729	22.1683	DOWN	AT4G10270.1	Wound-responsive family protein
contig61681	10.2484	13.7751	26.8441	7.21372	DOWN	AT1G22170.1	Phosphoglycerate mutase family protein
contig622	13.2551	14.6071	25.9857	3.9617	DOWN	AT4G13420.1	high affinity K+ transporter 5
contig62301	9.79856	11.2172	20.2527	5.72127	DOWN	AT3G63530.1	RING/U-box superfamily protein
contig62338	15.0168	18.6322	21.5768	8.81825	DOWN
contig6283	55.3361	40.6475	63.6874	25.6521	DOWN	AT5G58380.1	SOS3-interacting protein 1
contig62936	11.1368	12.7549	35.4501	8.29284	DOWN
contig63028	2.77035	1.94107	21.5502	8.97199	DOWN
contig63036	5.78223	8.72578	33.5218	4.62186	DOWN	AT1G08090.1	nitrate transporter 2:1
contig63077	10.5331	15.9825	40.3944	4.88623	DOWN	AT2G23780.1	RING/U-box superfamily protein
contig6320	47.7958	66.5793	113.675	46.215	DOWN	AT3G05500.1	Rubber elongation factor protein (REF)
contig63324	7.37167	7.43997	37.336	8.11126	DOWN	AT5G47060.1	Protein of unknown function (DUF581)
contig6354	20.6087	28.0886	163.637	28.1607	DOWN
contig6366	499.975	571.591	821.327	305.554	DOWN	AT5G60390.1	GTP binding Elongation factor Tu family protein
contig63743	9.72269	13.0007	20.5329	6.49356	DOWN
contig64426	22.0432	36.7044	33.2107	13.9335	DOWN
contig64638	27.9229	39.4209	61.4768	18.2934	DOWN
contig64742	15.2019	12.5254	22.0926	8.12999	DOWN	AT3G23600.1	alpha/beta-Hydrolases superfamily protein
contig65005	76.4793	83.3277	39.8575	9.58773	DOWN	AT2G14440.1	Leucine-rich repeat protein kinase family protein
contig65031	20.5093	23.2611	26.7749	10.9385	DOWN	AT4G24290.2	MAC/Perforin domain-containing protein
contig65286	1.33106	2.31185	29.5589	6.87444	DOWN
contig6587	109.234	143.074	169.159	60.8216	DOWN	AT5G11520.1	aspartate aminotransferase 3
contig66060	12.1986	18.4177	25.823	5.12336	DOWN	AT1G77330.1	2-oxoglutarate (2OG) and Fe(II)-dependent oxygenase superfamily protein
contig6614	19.1553	24.9981	42.6885	17.5433	DOWN	AT2G01190.1	Octicosapeptide/Phox/Bem1p family protein
contig6637	184.27	228.748	429.119	143.955	DOWN	AT2G05710.1	aconitase 3
contig66574	15.3091	7.25802	24.2458	8.49113	DOWN	AT1G08650.1	phosphoenolpyruvate carboxylase kinase 1
contig66735	17.224	18.5062	64.0145	22.1053	DOWN	AT3G05640.1	Protein phosphatase 2C family protein
contig6675	57.0057	73.7022	98.5024	41.1007	DOWN	AT5G08530.1	51 kDa subunit of complex I
contig66958	43.3594	33.172	52.8816	21.2799	DOWN	AT2G25110.1	stromal cell-derived factor 2-like protein precursor
contig67014	17.2309	22.9454	37.4799	14.2058	DOWN	AT4G31490.1	Coatomer beta subunit
contig6731	88.6475	54.667	242.556	67.5364	DOWN
contig67328	16.2107	21.1197	28.2256	11.2992	DOWN
contig6743	251.7	406.191	346.679	136.427	DOWN	AT4G14880.1	O-acetylserine (thiol) lyase (OAS-TL) isoform A1
contig67565	2.59942	3.28507	41.3455	4.14786	DOWN
contig67745	13.3536	12.5171	23.1961	8.98851	DOWN	AT3G54140.1	peptide transporter 1
contig6799	19.3885	21.7502	32.7385	10.6783	DOWN	AT1G06290.1	acyl-CoA oxidase 3
contig68404	5.93374	4.47355	59.0128	15.3218	DOWN	AT4G10270.1	Wound-responsive family protein
contig68461	8.79033	12.3117	20.5614	6.99229	DOWN	AT3G01780.1	ARM repeat superfamily protein
contig6868	27.013	18.624	24.6752	6.49309	DOWN	AT1G20860.1	phosphate transporter 1;8
contig68759	6.57788	6.71151	25.761	10.5392	DOWN	AT3G16770.1	ethylene-responsive element binding protein
contig69033	6.55835	3.40751	90.6506	11.1643	DOWN	AT4G10270.1	Wound-responsive family protein
contig6972	12.4341	19.1361	28.4589	11.331	DOWN	AT1G51760.1	peptidase M20/M25/M40 family protein
contig69882	0.614349	3.78389	26.7466	2.06372	DOWN
contig6991	23.3523	25.648	43.0204	17.5643	DOWN	AT5G46110.4	Glucose-6-phosphate/phosphate translocator-related
contig7003	11.7517	15.263	24.8748	7.49786	DOWN	AT3G14690.1	cytochrome P450 family 72 subfamily A polypeptide 15
contig70115	17.8638	17.0946	20.498	8.00009	DOWN	AT2G37430.1	C2H2 and C2HC zinc fingers superfamily protein
contig7018	53.7756	61.009	70.4642	29.4939	DOWN	AT2G38870.1	Serine protease inhibitor potato inhibitor I-type family protein
contig704	197.463	315.166	432.912	174.503	DOWN	AT5G03340.1	ATPase AAA-type CDC48 protein
contig70882	21.8243	33.1687	45.9462	15.6817	DOWN
contig70982	19.4565	23.5415	24.9822	10.308	DOWN	AT2G16430.2	purple acid phosphatase 10
contig71213	4.24688	6.6175	75.2858	18.4895	DOWN	AT1G21200.1	sequence-specific DNA binding transcription factors
contig7161	25.0547	24.187	28.1561	10.3509	DOWN
contig72129	4.30113	2.97326	39.9307	2.22682	DOWN	AT5G25280.1	serine-rich protein-related
contig7232	13.6736	17.1496	24.2376	8.60945	DOWN	AT5G58740.1	HSP20-like chaperones superfamily protein
contig72327	21.5572	34.8276	50.5249	17.0925	DOWN	AT5G17330.1	glutamate decarboxylase
contig72829	8.94861	8.07406	84.0892	15.9664	DOWN	AT4G10270.1	Wound-responsive family protein
contig73531	4.80036	3.65665	68.6719	11.329	DOWN
contig74042	24.1705	13.5773	20.9122	7.50095	DOWN	AT1G04770.1	Tetratricopeptide repeat (TPR)-like superfamily protein
contig74349	17.8584	11.4972	22.4698	4.19966	DOWN
contig74360	7.36951	9.19549	48.5918	5.18212	DOWN	AT1G72360.2	Integrase-type DNA-binding superfamily protein
contig7439	12.9484	18.7455	20.5398	7.6759	DOWN	AT5G53480.1	ARM repeat superfamily protein
contig7474	7.73776	11.0127	20.0492	6.9944	DOWN	AT3G15630.1	unknown protein; FUNCTIONS IN: molecular_function unknown; INVOLVED IN: biological_process unknown; LOCATED IN: chloroplast; EXPRESSED IN: 24 plant structures; EXPRESSED DURING: 15 growth stages; BEST Arabidopsis thaliana protein match is: unknown protein (TAIR:AT1G52720.1); Has 61 Blast hits to 61 proteins in 13 species: Archae - 0; Bacteria - 0; Metazoa - 0; Fungi - 0; Plants - 61; Viruses - 0;…
contig74935	4.8068	5.17539	20.4825	5.17737	DOWN	AT5G47060.1	Protein of unknown function (DUF581)
contig74967	17.471	23.1875	51.9926	19.7291	DOWN
contig75164	18.6169	11.1466	20.5713	2.74728	DOWN
contig7579	15.2285	11.8223	23.7671	8.74606	DOWN	AT4G34350.1	4-hydroxy-3-methylbut-2-enyl diphosphate reductase
contig7585	8.93848	4.51348	23.096	7.20252	DOWN	AT4G35090.1	catalase 2
contig7605	44.1171	45.9346	29.9177	12.3767	DOWN
contig7630	28.4956	38.7448	49.0204	17.0087	DOWN	AT1G32780.1	GroES-like zinc-binding dehydrogenase family protein
contig77015	2.13904	2.46284	20.7415	5.77092	DOWN	AT3G10040.1	sequence-specific DNA binding transcription factors
contig771	8.39742	6.28282	26.7619	9.02814	DOWN	AT5G03380.1	Heavy metal transport/detoxification superfamily protein
contig77309	12.3909	18.95	21.3193	5.4459	DOWN	AT5G10990.1	SAUR-like auxin-responsive protein family
contig77673	14.3686	9.81231	30.5251	8.14142	DOWN	AT3G53990.1	Adenine nucleotide alpha hydrolases-like superfamily protein
contig7882	65.6766	96.0467	82.5312	34.6365	DOWN
contig78916	9.4318	12.9193	26.2934	7.01784	DOWN
contig793	307.832	347.058	477.57	195.077	DOWN	AT5G56010.1	heat shock protein 81-3
contig7953	37.4207	59.9557	89.306	26.832	DOWN	AT5G42050.1	DCD (Development and Cell Death) domain protein
contig8011	22.7919	29.0574	33.8725	14.2077	DOWN	AT1G78070.1	Transducin/WD40 repeat-like superfamily protein
contig8073	13.3513	19.1237	29.6494	7.62957	DOWN	AT5G24530.1	2-oxoglutarate (2OG) and Fe(II)-dependent oxygenase superfamily protein
contig80825	12.7941	19.5107	23.0184	7.23852	DOWN
contig81223	25.1293	37.4785	29.0553	8.80021	DOWN
contig81297	12.0966	15.414	36.7162	2.95844	DOWN
contig81349	20.0387	16.1035	23.2294	3.6234	DOWN
contig8141	10.0913	10.2291	20.2856	6.66787	DOWN
contig81557	15.0489	23.4641	28.4128	10.1919	DOWN	AT5G57620.1	myb domain protein 36
contig81658	19.8706	22.9715	22.8969	8.40811	DOWN	AT5G49690.1	UDP-Glycosyltransferase superfamily protein
contig81852	18.4223	27.6717	41.0701	13.6359	DOWN	AT1G68090.1	annexin 5
contig8233	10.0756	10.5107	23.482	3.8837	DOWN	AT3G09270.1	glutathione S-transferase TAU 8
contig8238	71.2955	101.67	193.543	62.5421	DOWN	AT3G05500.1	Rubber elongation factor protein (REF)
contig8291	46.6494	45.3598	56.651	20.5783	DOWN	AT5G43850.1	RmlC-like cupins superfamily protein
contig8322	10.82	10.0957	21.5893	6.68926	DOWN	AT3G23550.1	MATE efflux family protein
contig8323	12.1619	13.2351	26.4642	8.42158	DOWN	AT3G23550.1	MATE efflux family protein
contig84005	4.28182	3.2348	76.9201	6.50553	DOWN	AT4G10270.1	Wound-responsive family protein
contig8420	24.19	33.9648	43.4833	17.3192	DOWN	AT5G42740.1	Sugar isomerase (SIS) family protein
contig84843	22.0715	10.6459	32.6735	4.89262	DOWN	AT5G08290.1	mRNA splicing factor thioredoxin-like U5 snRNP
contig8552	286.171	290.716	478.001	197.004	DOWN	AT2G27510.1	ferredoxin 3
contig8569	25.9935	36.9082	59.072	18.9086	DOWN	AT5G42740.1	Sugar isomerase (SIS) family protein
contig869	24.2624	12.64	52.402	17.1784	DOWN	AT5G64700.1	nodulin MtN21 /EamA-like transporter family protein
contig870	13.23	7.12809	32.263	11.3442	DOWN	AT5G64700.1	nodulin MtN21 /EamA-like transporter family protein
contig89403	13.0567	16.4933	21.3393	7.38141	DOWN	AT1G49100.1	Leucine-rich repeat protein kinase family protein
contig8945	13.3333	8.82439	21.9635	5.60358	DOWN	AT1G21230.1	wall associated kinase 5
contig9011	18.8881	27.0166	40.9248	10.3616	DOWN	AT3G14640.1	cytochrome P450 family 72 subfamily A polypeptide 10
contig906	42.7048	53.6183	68.4675	21.8545	DOWN	AT4G24690.1	ubiquitin-associated (UBA)/TS-N domain-containing protein / octicosapeptide/Phox/Bemp1 (PB1) domain-containing protein
contig907	33.0631	41.1096	52.5642	17.0623	DOWN	AT4G24690.1	ubiquitin-associated (UBA)/TS-N domain-containing protein / octicosapeptide/Phox/Bemp1 (PB1) domain-containing protein
contig91022	6.56913	8.03287	25.4369	7.94916	DOWN
contig91344	93.7041	58.4707	61.3067	23.4582	DOWN	AT4G22990.2	Major Facilitator Superfamily with SPX (SYG1/Pho81/XPR1) domain-containing protein
contig9146	21.8832	28.1233	29.4797	10.4103	DOWN	AT4G02860.1	Phenazine biosynthesis PhzC/PhzF protein
contig9167	11.7421	14.2532	20.0883	7.19473	DOWN
contig9168	20.0677	23.0594	30.0951	11.3002	DOWN
contig9195	57.9228	50.4476	70.9686	27.2868	DOWN	AT2G33770.1	phosphate 2
contig9466	39.5157	59.7823	80.8729	31.3777	DOWN	AT2G32300.1	uclacyanin 1
contig9510	39.8878	45.579	62.8641	22.4081	DOWN	AT4G11650.1	osmotin 34
contig9545	29.2957	33.9223	54.5013	22.9073	DOWN	AT2G46860.1	pyrophosphorylase 3
contig95605	7.6538	7.89412	33.1622	11.4923	DOWN	AT2G47520.1	Integrase-type DNA-binding superfamily protein
contig9607	3.66566	5.1214	23.1943	9.67299	DOWN	AT1G58170.1	Disease resistance-responsive (dirigent-like protein) family protein
contig9612	35.1957	28.088	57.7893	19.1203	DOWN	AT5G47550.1	Cystatin/monellin superfamily protein
contig9680	9.56239	10.5042	21.7134	9.09835	DOWN	AT2G04350.1	AMP-dependent synthetase and ligase family protein
contig97412	3.89362	5.16621	90.649	19.9385	DOWN
contig9753	21.6643	17.0824	30.7168	12.0548	DOWN	AT2G25110.1	stromal cell-derived factor 2-like protein precursor
contig9782	14.2103	22.391	29.4543	11.321	DOWN	AT4G33300.1	ADR1-like 1
contig980	57.7026	79.273	147.54	50.8792	DOWN	AT2G36460.1	Aldolase superfamily protein
contig9971	35.2625	45.0228	53.6181	22.4141	DOWN	AT2G29400.1	type one protein phosphatase 1
