# Supplementary figures and images for: Molecular Responses to Cadmium Exposure in Two Contrasting Durum Wheat Genotypes
Source: MDPI journal article supplement (doi:10.3390/ijms22147343), 2021-07-08

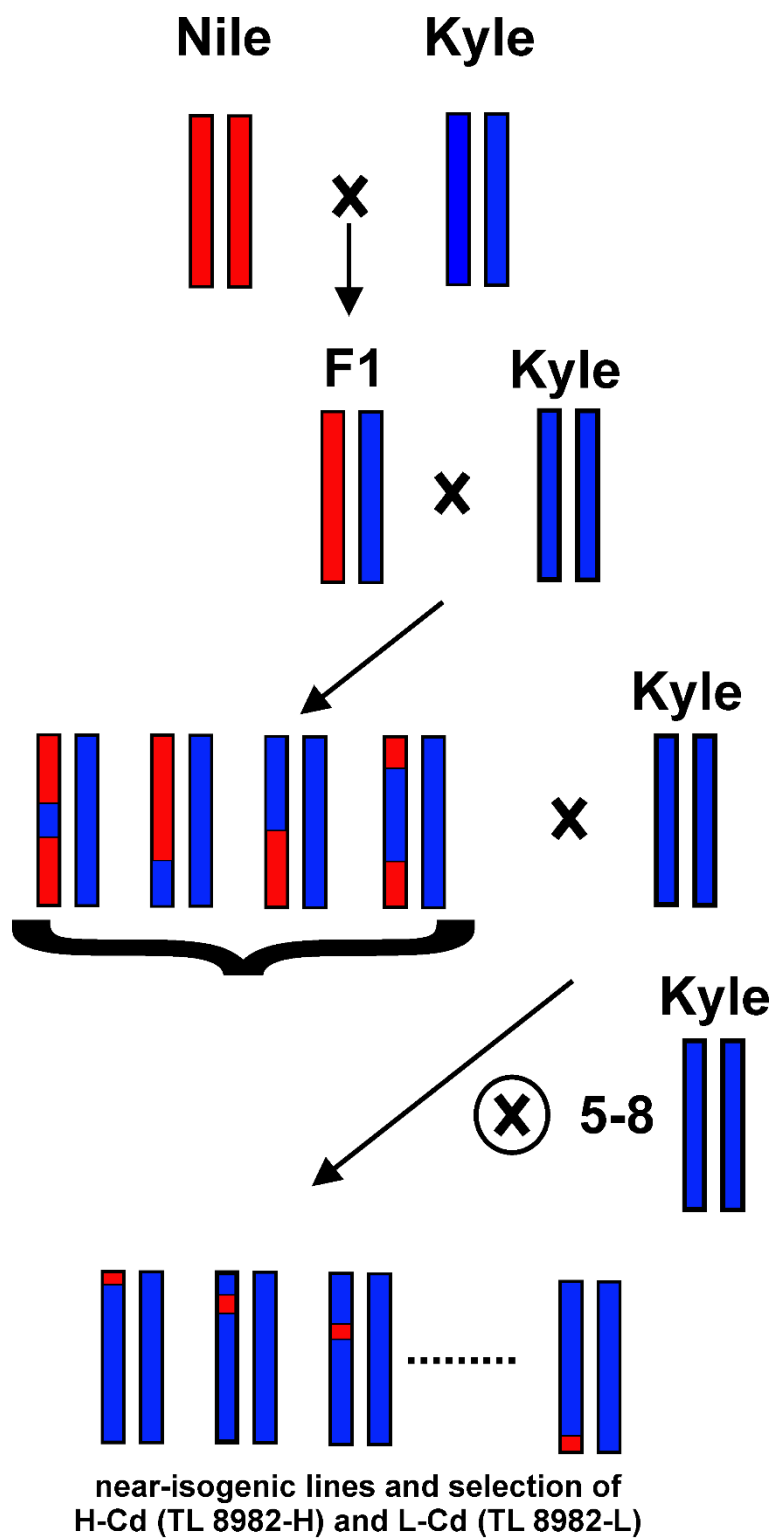

Figure S1. Near-isogenic line breeding scheme.

Supplement: s1 [file s1]
